# Supplementary material
Source: publisher figshare collection journal article supplement (https://acs.figshare.com/ndownloader/files/4678390)
Supplement: Supplementary file 1 [file 4678390]

MODEL        1
ATOM      1  N   PHE     1      57.400  62.441  89.616  0.00  0.00
ATOM      2  H1  PHE     1      57.563  62.764  89.871  0.00  0.00
ATOM      3  H2  PHE     1      57.776  62.484  89.742  0.00  0.00
ATOM      4  H3  PHE     1      57.581  62.718  89.488  0.00  0.00
ATOM      5  CA  PHE     1      56.372  61.566  89.253  0.00  0.00
ATOM      6  HA  PHE     1      56.764  60.901  88.587  0.00  0.00
ATOM      7  CB  PHE     1      55.914  60.845  90.397  0.00  0.00
ATOM      8  HB2 PHE     1      55.510  61.476  91.044  0.00  0.00
ATOM      9  HB3 PHE     1      55.162  60.247  90.072  0.00  0.00
ATOM     10  CG  PHE     1      56.912  60.059  91.078  0.00  0.00
ATOM     11  CD1 PHE     1      57.314  60.345  92.260  0.00  0.00
ATOM     12  HD1 PHE     1      56.938  61.129  92.690  0.00  0.00
ATOM     13  CE1 PHE     1      58.224  59.615  92.894  0.00  0.00
ATOM     14  HE1 PHE     1      58.523  59.837  93.798  0.00  0.00
ATOM     15  CZ  PHE     1      58.729  58.603  92.346  0.00  0.00
ATOM     16  HZ  PHE     1      59.425  58.054  92.826  0.00  0.00
ATOM     17  CE2 PHE     1      58.344  58.307  91.164  0.00  0.00
ATOM     18  HE2 PHE     1      58.756  57.536  90.737  0.00  0.00
ATOM     19  CD2 PHE     1      57.431  59.033  90.532  0.00  0.00
ATOM     20  HD2 PHE     1      57.135  58.798  89.632  0.00  0.00
ATOM     21  C   PHE     1      55.253  62.266  88.574  0.00  0.00
ATOM     22  O   PHE     1      54.859  63.265  89.010  0.00  0.00
ATOM     23  N   LEU     2      54.741  61.747  87.497  0.00  0.00
ATOM     24  H   LEU     2      55.140  60.941  87.194  0.00  0.00
ATOM     25  CA  LEU     2      53.685  62.302  86.676  0.00  0.00
ATOM     26  HA  LEU     2      53.051  62.856  87.319  0.00  0.00
ATOM     27  CB  LEU     2      54.326  63.219  85.677  0.00  0.00
ATOM     28  HB2 LEU     2      55.053  63.809  86.137  0.00  0.00
ATOM     29  HB3 LEU     2      54.806  62.643  84.981  0.00  0.00
ATOM     30  CG  LEU     2      53.413  64.123  84.965  0.00  0.00
ATOM     31  HG  LEU     2      52.713  63.591  84.481  0.00  0.00
ATOM     32  CD1 LEU     2      52.761  65.029  85.826  0.00  0.00
ATOM     33 1HD1 LEU     2      52.553  65.197  86.010  0.00  0.00
ATOM     34 2HD1 LEU     2      52.651  65.251  86.104  0.00  0.00
ATOM     35 3HD1 LEU     2      52.587  65.304  85.981  0.00  0.00
ATOM     36  CD2 LEU     2      54.108  64.920  83.996  0.00  0.00
ATOM     37 1HD2 LEU     2      54.056  65.050  83.621  0.00  0.00
ATOM     38 2HD2 LEU     2      54.301  65.353  83.873  0.00  0.00
ATOM     39 3HD2 LEU     2      54.466  64.931  83.775  0.00  0.00
ATOM     40  C   LEU     2      52.799  61.264  86.012  0.00  0.00
ATOM     41  O   LEU     2      51.782  61.584  85.486  0.00  0.00
ATOM     42  N   SER     3      53.167  60.023  86.027  0.00  0.00
ATOM     43  H   SER     3      54.003  59.813  86.461  0.00  0.00
ATOM     44  CA  SER     3      52.436  58.922  85.415  0.00  0.00
ATOM     45  HA  SER     3      52.126  59.220  84.465  0.00  0.00
ATOM     46  CB  SER     3      53.359  57.791  85.252  0.00  0.00
ATOM     47  HB2 SER     3      53.522  57.449  85.078  0.00  0.00
ATOM     48  HB3 SER     3      53.691  57.649  85.176  0.00  0.00
ATOM     49  OG  SER     3      53.595  57.371  85.389  0.00  0.00
ATOM     50  HG  SER     3      53.993  56.844  85.195  0.00  0.00
ATOM     51  C   SER     3      51.205  58.464  86.156  0.00  0.00
ATOM     52  O   SER     3      51.072  58.752  87.313  0.00  0.00
ATOM     53  N   LEU     4      50.341  57.707  85.502  0.00  0.00
ATOM     54  H   LEU     4      50.549  57.518  84.563  0.00  0.00
ATOM     55  CA  LEU     4      49.095  57.151  86.009  0.00  0.00
ATOM     56  HA  LEU     4      48.421  57.967  86.137  0.00  0.00
ATOM     57  CB  LEU     4      48.528  56.230  84.928  0.00  0.00
ATOM     58  HB2 LEU     4      48.446  56.782  84.032  0.00  0.00
ATOM     59  HB3 LEU     4      49.226  55.456  84.758  0.00  0.00
ATOM     60  CG  LEU     4      47.194  55.572  85.206  0.00  0.00
ATOM     61  HG  LEU     4      47.232  55.042  86.076  0.00  0.00
ATOM     62  CD1 LEU     4      46.097  56.503  85.298  0.00  0.00
ATOM     63 1HD1 LEU     4      45.526  56.404  85.449  0.00  0.00
ATOM     64 2HD1 LEU     4      46.060  56.948  85.629  0.00  0.00
ATOM     65 3HD1 LEU     4      45.905  56.825  84.910  0.00  0.00
ATOM     66  CD2 LEU     4      46.849  54.637  84.138  0.00  0.00
ATOM     67 1HD2 LEU     4      46.629  54.424  83.917  0.00  0.00
ATOM     68 2HD2 LEU     4      46.838  54.311  83.948  0.00  0.00
ATOM     69 3HD2 LEU     4      46.828  54.486  83.777  0.00  0.00
ATOM     70  C   LEU     4      49.193  56.463  87.353  0.00  0.00
ATOM     71  O   LEU     4      48.275  56.495  88.118  0.00  0.00
ATOM     72  N   ASP     5      50.310  55.872  87.674  0.00  0.00
ATOM     73  H   ASP     5      51.022  55.880  87.003  0.00  0.00
ATOM     74  CA  ASP     5      50.598  55.245  88.941  0.00  0.00
ATOM     75  HA  ASP     5      49.779  54.663  89.203  0.00  0.00
ATOM     76  CB  ASP     5      51.743  54.342  88.736  0.00  0.00
ATOM     77  HB2 ASP     5      51.696  53.931  87.956  0.00  0.00
ATOM     78  HB3 ASP     5      52.517  54.750  88.716  0.00  0.00
ATOM     79  CG  ASP     5      51.915  53.428  89.574  0.00  0.00
ATOM     80  OD1 ASP     5      51.697  52.982  89.833  0.00  0.00
ATOM     81  OD2 ASP     5      52.290  53.118  89.957  0.00  0.00
ATOM     82  C   ASP     5      50.846  56.192  90.109  0.00  0.00
ATOM     83  O   ASP     5      51.048  55.786  91.160  0.00  0.00
ATOM     84  N   SER     6      50.829  57.448  89.952  0.00  0.00
ATOM     85  H   SER     6      50.605  57.729  89.080  0.00  0.00
ATOM     86  CA  SER     6      51.172  58.453  90.950  0.00  0.00
ATOM     87  HA  SER     6      51.523  57.943  91.826  0.00  0.00
ATOM     88  CB  SER     6      52.315  59.301  90.441  0.00  0.00
ATOM     89  HB2 SER     6      52.727  59.858  91.256  0.00  0.00
ATOM     90  HB3 SER     6      53.083  58.681  90.045  0.00  0.00
ATOM     91  OG  SER     6      51.910  60.198  89.458  0.00  0.00
ATOM     92  HG  SER     6      51.596  59.719  88.723  0.00  0.00
ATOM     93  C   SER     6      49.995  59.334  91.348  0.00  0.00
ATOM     94  O   SER     6      49.096  59.525  90.555  0.00  0.00
ATOM     95  N   PRO     7      49.978  59.922  92.546  0.00  0.00
ATOM     96  CD  PRO     7      50.893  59.702  93.621  0.00  0.00
ATOM     97  HD2 PRO     7      51.865  59.941  93.350  0.00  0.00
ATOM     98  HD3 PRO     7      50.844  58.712  93.932  0.00  0.00
ATOM     99  CG  PRO     7      50.470  60.584  94.724  0.00  0.00
ATOM    100  HG2 PRO     7      51.062  61.321  94.787  0.00  0.00
ATOM    101  HG3 PRO     7      50.460  60.119  95.550  0.00  0.00
ATOM    102  CB  PRO     7      49.178  61.078  94.430  0.00  0.00
ATOM    103  HB2 PRO     7      49.095  62.019  94.712  0.00  0.00
ATOM    104  HB3 PRO     7      48.531  60.549  94.952  0.00  0.00
ATOM    105  CA  PRO     7      48.978  60.891  92.947  0.00  0.00
ATOM    106  HA  PRO     7      48.005  60.483  92.779  0.00  0.00
ATOM    107  C   PRO     7      49.052  62.215  92.194  0.00  0.00
ATOM    108  O   PRO     7      48.130  62.964  92.192  0.00  0.00
ATOM    109  N   THR     8      50.144  62.503  91.547  0.00  0.00
ATOM    110  H   THR     8      50.875  61.861  91.613  0.00  0.00
ATOM    111  CA  THR     8      50.411  63.703  90.764  0.00  0.00
ATOM    112  HA  THR     8      49.910  64.526  91.209  0.00  0.00
ATOM    113  CB  THR     8      51.881  64.022  90.751  0.00  0.00
ATOM    114  HB  THR     8      52.167  64.164  89.965  0.00  0.00
ATOM    115  CG2 THR     8      52.218  65.001  91.407  0.00  0.00
ATOM    116 1HG2 THR     8      52.466  65.136  91.634  0.00  0.00
ATOM    117 2HG2 THR     8      52.341  65.340  91.397  0.00  0.00
ATOM    118 3HG2 THR     8      52.109  65.255  91.649  0.00  0.00
ATOM    119  OG1 THR     8      52.640  63.218  91.195  0.00  0.00
ATOM    120  HG1 THR     8      53.040  63.298  90.897  0.00  0.00
ATOM    121  C   THR     8      49.901  63.632  89.341  0.00  0.00
ATOM    122  O   THR     8      49.956  64.610  88.657  0.00  0.00
ATOM    123  N   TYR     9      49.387  62.509  88.889  0.00  0.00
ATOM    124  H   TYR     9      49.411  61.744  89.488  0.00  0.00
ATOM    125  CA  TYR     9      48.714  62.337  87.608  0.00  0.00
ATOM    126  HA  TYR     9      49.445  62.505  86.842  0.00  0.00
ATOM    127  CB  TYR     9      48.226  60.908  87.518  0.00  0.00
ATOM    128  HB2 TYR     9      49.070  60.276  87.521  0.00  0.00
ATOM    129  HB3 TYR     9      47.682  60.693  88.395  0.00  0.00
ATOM    130  CG  TYR     9      47.387  60.567  86.320  0.00  0.00
ATOM    131  CD1 TYR     9      47.942  60.582  85.045  0.00  0.00
ATOM    132  HD1 TYR     9      48.966  60.821  84.925  0.00  0.00
ATOM    133  CE1 TYR     9      47.158  60.272  83.941  0.00  0.00
ATOM    134  HE1 TYR     9      47.586  60.292  82.973  0.00  0.00
ATOM    135  CZ  TYR     9      45.819  59.941  84.102  0.00  0.00
ATOM    136  OH  TYR     9      45.056  59.631  83.049  0.00  0.00
ATOM    137  HH  TYR     9      45.527  59.645  82.249  0.00  0.00
ATOM    138  CE2 TYR     9      45.269  59.913  85.380  0.00  0.00
ATOM    139  HE2 TYR     9      44.256  59.628  85.504  0.00  0.00
ATOM    140  CD2 TYR     9      46.057  60.208  86.483  0.00  0.00
ATOM    141  HD2 TYR     9      45.644  60.133  87.458  0.00  0.00
ATOM    142  C   TYR     9      47.569  63.331  87.392  0.00  0.00
ATOM    143  O   TYR     9      46.877  63.683  88.331  0.00  0.00
ATOM    144  N   VAL    10      47.333  63.763  86.162  0.00  0.00
ATOM    145  H   VAL    10      47.952  63.460  85.454  0.00  0.00
ATOM    146  CA  VAL    10      46.327  64.757  85.787  0.00  0.00
ATOM    147  HA  VAL    10      46.587  65.658  86.318  0.00  0.00
ATOM    148  CB  VAL    10      46.420  65.077  84.288  0.00  0.00
ATOM    149  HB  VAL    10      47.414  65.334  84.081  0.00  0.00
ATOM    150  CG1 VAL    10      46.093  63.947  83.393  0.00  0.00
ATOM    151 1HG1 VAL    10      45.796  63.507  83.448  0.00  0.00
ATOM    152 2HG1 VAL    10      45.884  63.931  82.947  0.00  0.00
ATOM    153 3HG1 VAL    10      46.396  63.578  83.113  0.00  0.00
ATOM    154  CG2 VAL    10      45.601  66.231  83.876  0.00  0.00
ATOM    155 1HG2 VAL    10      45.368  66.556  83.889  0.00  0.00
ATOM    156 2HG2 VAL    10      45.521  66.559  83.727  0.00  0.00
ATOM    157 3HG2 VAL    10      45.335  66.436  83.683  0.00  0.00
ATOM    158  C   VAL    10      44.897  64.428  86.214  0.00  0.00
ATOM    159  O   VAL    10      44.183  65.333  86.595  0.00  0.00
ATOM    160  N   LEU    11      44.499  63.160  86.222  0.00  0.00
ATOM    161  H   LEU    11      45.178  62.498  85.928  0.00  0.00
ATOM    162  CA  LEU    11      43.209  62.648  86.684  0.00  0.00
ATOM    163  HA  LEU    11      43.059  61.722  86.157  0.00  0.00
ATOM    164  CB  LEU    11      43.319  62.302  88.171  0.00  0.00
ATOM    165  HB2 LEU    11      44.249  61.791  88.336  0.00  0.00
ATOM    166  HB3 LEU    11      43.366  63.216  88.722  0.00  0.00
ATOM    167  CG  LEU    11      42.197  61.455  88.749  0.00  0.00
ATOM    168  HG  LEU    11      41.261  61.942  88.593  0.00  0.00
ATOM    169  CD1 LEU    11      42.132  60.093  88.133  0.00  0.00
ATOM    170 1HD1 LEU    11      41.866  59.786  87.909  0.00  0.00
ATOM    171 2HD1 LEU    11      42.293  59.810  87.828  0.00  0.00
ATOM    172 3HD1 LEU    11      42.156  59.677  88.233  0.00  0.00
ATOM    173  CD2 LEU    11      42.397  61.266  90.228  0.00  0.00
ATOM    174 1HD2 LEU    11      42.502  61.461  90.637  0.00  0.00
ATOM    175 2HD2 LEU    11      42.206  61.147  90.589  0.00  0.00
ATOM    176 3HD2 LEU    11      42.615  61.055  90.534  0.00  0.00
ATOM    177  C   LEU    11      42.006  63.527  86.320  0.00  0.00
ATOM    178  O   LEU    11      41.366  64.117  87.176  0.00  0.00
ATOM    179  N   TYR    12      41.704  63.620  85.031  0.00  0.00
ATOM    180  H   TYR    12      42.262  63.105  84.393  0.00  0.00
ATOM    181  CA  TYR    12      40.660  64.470  84.462  0.00  0.00
ATOM    182  HA  TYR    12      41.009  65.490  84.500  0.00  0.00
ATOM    183  CB  TYR    12      40.454  64.123  82.982  0.00  0.00
ATOM    184  HB2 TYR    12      39.931  63.190  82.916  0.00  0.00
ATOM    185  HB3 TYR    12      39.814  64.868  82.555  0.00  0.00
ATOM    186  CG  TYR    12      41.703  64.030  82.140  0.00  0.00
ATOM    187  CD1 TYR    12      42.266  62.787  81.878  0.00  0.00
ATOM    188  HD1 TYR    12      41.817  61.911  82.278  0.00  0.00
ATOM    189  CE1 TYR    12      43.404  62.677  81.070  0.00  0.00
ATOM    190  HE1 TYR    12      43.827  61.730  80.852  0.00  0.00
ATOM    191  CZ  TYR    12      43.976  63.825  80.520  0.00  0.00
ATOM    192  OH  TYR    12      45.058  63.728  79.726  0.00  0.00
ATOM    193  HH  TYR    12      45.315  64.557  79.363  0.00  0.00
ATOM    194  CE2 TYR    12      43.413  65.066  80.778  0.00  0.00
ATOM    195  HE2 TYR    12      43.853  65.931  80.351  0.00  0.00
ATOM    196  CD2 TYR    12      42.273  65.173  81.584  0.00  0.00
ATOM    197  HD2 TYR    12      41.833  66.118  81.773  0.00  0.00
ATOM    198  C   TYR    12      39.312  64.418  85.195  0.00  0.00
ATOM    199  O   TYR    12      38.697  65.442  85.391  0.00  0.00
ATOM    200  N   ARG    13      38.878  63.247  85.643  0.00  0.00
ATOM    201  H   ARG    13      39.439  62.460  85.416  0.00  0.00
ATOM    202  CA  ARG    13      37.653  63.019  86.420  0.00  0.00
ATOM    203  HA  ARG    13      36.829  63.417  85.855  0.00  0.00
ATOM    204  CB  ARG    13      37.449  61.517  86.580  0.00  0.00
ATOM    205  HB2 ARG    13      37.888  61.076  86.054  0.00  0.00
ATOM    206  HB3 ARG    13      37.681  61.215  87.301  0.00  0.00
ATOM    207  CG  ARG    13      36.354  61.010  86.449  0.00  0.00
ATOM    208  HG2 ARG    13      35.904  61.451  86.977  0.00  0.00
ATOM    209  HG3 ARG    13      36.109  61.294  85.717  0.00  0.00
ATOM    210  CD  ARG    13      36.168  59.526  86.628  0.00  0.00
ATOM    211  HD2 ARG    13      36.892  59.177  87.269  0.00  0.00
ATOM    212  HD3 ARG    13      35.248  59.355  87.054  0.00  0.00
ATOM    213  NE  ARG    13      36.249  58.808  85.415  0.00  0.00
ATOM    214  HE  ARG    13      36.376  59.293  84.606  0.00  0.00
ATOM    215  CZ  ARG    13      36.197  57.575  85.262  0.00  0.00
ATOM    216  NH1 ARG    13      36.029  56.780  86.187  0.00  0.00
ATOM    217 1HH1 ARG    13      35.926  57.094  87.084  0.00  0.00
ATOM    218 2HH1 ARG    13      36.015  55.854  85.990  0.00  0.00
ATOM    219  NH2 ARG    13      36.321  57.088  84.134  0.00  0.00
ATOM    220 1HH2 ARG    13      36.519  57.686  83.412  0.00  0.00
ATOM    221 2HH2 ARG    13      36.291  56.157  84.040  0.00  0.00
ATOM    222  C   ARG    13      37.624  63.728  87.768  0.00  0.00
ATOM    223  O   ARG    13      36.602  64.099  88.225  0.00  0.00
ATOM    224  N   ASP    14      38.732  63.950  88.388  0.00  0.00
ATOM    225  H   ASP    14      39.537  63.630  87.943  0.00  0.00
ATOM    226  CA  ASP    14      38.867  64.662  89.652  0.00  0.00
ATOM    227  HA  ASP    14      37.947  64.608  90.186  0.00  0.00
ATOM    228  CB  ASP    14      39.915  63.983  90.489  0.00  0.00
ATOM    229  HB2 ASP    14      39.702  62.951  90.530  0.00  0.00
ATOM    230  HB3 ASP    14      40.851  64.101  90.028  0.00  0.00
ATOM    231  CG  ASP    14      39.966  64.506  91.875  0.00  0.00
ATOM    232  OD1 ASP    14      39.888  64.722  92.394  0.00  0.00
ATOM    233  OD2 ASP    14      40.088  64.689  92.456  0.00  0.00
ATOM    234  C   ASP    14      39.189  66.135  89.484  0.00  0.00
ATOM    235  O   ASP    14      38.778  66.929  90.288  0.00  0.00
ATOM    236  N   ARG    15      39.851  66.519  88.401  0.00  0.00
ATOM    237  H   ARG    15      40.196  65.805  87.813  0.00  0.00
ATOM    238  CA  ARG    15      40.034  67.907  87.988  0.00  0.00
ATOM    239  HA  ARG    15      40.498  68.427  88.797  0.00  0.00
ATOM    240  CB  ARG    15      40.939  67.975  86.771  0.00  0.00
ATOM    241  HB2 ARG    15      41.055  67.294  86.399  0.00  0.00
ATOM    242  HB3 ARG    15      40.651  68.431  86.226  0.00  0.00
ATOM    243  CG  ARG    15      42.067  68.372  86.792  0.00  0.00
ATOM    244  HG2 ARG    15      42.035  68.991  87.114  0.00  0.00
ATOM    245  HG3 ARG    15      42.264  67.922  87.245  0.00  0.00
ATOM    246  CD  ARG    15      42.987  68.532  85.756  0.00  0.00
ATOM    247  HD2 ARG    15      43.772  68.119  86.033  0.00  0.00
ATOM    248  HD3 ARG    15      42.686  68.048  85.015  0.00  0.00
ATOM    249  NE  ARG    15      43.247  69.830  85.397  0.00  0.00
ATOM    250  HE  ARG    15      43.042  70.089  85.168  0.00  0.00
ATOM    251  CZ  ARG    15      43.722  70.684  85.314  0.00  0.00
ATOM    252  NH1 ARG    15      44.038  70.497  85.563  0.00  0.00
ATOM    253 1HH1 ARG    15      44.375  71.197  85.520  0.00  0.00
ATOM    254 2HH1 ARG    15      43.931  69.688  85.830  0.00  0.00
ATOM    255  NH2 ARG    15      43.884  71.764  84.984  0.00  0.00
ATOM    256 1HH2 ARG    15      43.633  71.918  84.798  0.00  0.00
ATOM    257 2HH2 ARG    15      44.228  72.422  84.925  0.00  0.00
ATOM    258  C   ARG    15      38.731  68.635  87.731  0.00  0.00
ATOM    259  O   ARG    15      38.636  69.803  87.995  0.00  0.00
ATOM    260  N   ALA    16      37.732  67.939  87.269  0.00  0.00
ATOM    261  H   ALA    16      37.937  67.009  87.043  0.00  0.00
ATOM    262  CA  ALA    16      36.362  68.367  87.101  0.00  0.00
ATOM    263  HA  ALA    16      35.891  67.632  86.521  0.00  0.00
ATOM    264  CB  ALA    16      35.716  68.332  88.443  0.00  0.00
ATOM    265  HB1 ALA    16      35.806  68.331  88.976  0.00  0.00
ATOM    266  HB2 ALA    16      35.424  68.581  88.636  0.00  0.00
ATOM    267  HB3 ALA    16      35.428  68.049  88.692  0.00  0.00
ATOM    268  C   ALA    16      36.121  69.670  86.327  0.00  0.00
ATOM    269  O   ALA    16      35.122  70.298  86.519  0.00  0.00
ATOM    270  N   GLU    17      37.016  70.100  85.469  0.00  0.00
ATOM    271  H   GLU    17      37.799  69.541  85.334  0.00  0.00
ATOM    272  CA  GLU    17      36.910  71.336  84.699  0.00  0.00
ATOM    273  HA  GLU    17      36.676  72.140  85.365  0.00  0.00
ATOM    274  CB  GLU    17      38.251  71.633  84.043  0.00  0.00
ATOM    275  HB2 GLU    17      38.650  70.993  83.659  0.00  0.00
ATOM    276  HB3 GLU    17      38.190  72.170  83.445  0.00  0.00
ATOM    277  CG  GLU    17      39.150  72.071  84.690  0.00  0.00
ATOM    278  HG2 GLU    17      38.744  72.671  85.081  0.00  0.00
ATOM    279  HG3 GLU    17      39.272  71.533  85.256  0.00  0.00
ATOM    280  CD  GLU    17      40.454  72.433  84.056  0.00  0.00
ATOM    281  OE1 GLU    17      41.078  72.496  83.979  0.00  0.00
ATOM    282  OE2 GLU    17      40.884  72.650  83.632  0.00  0.00
ATOM    283  C   GLU    17      35.809  71.317  83.642  0.00  0.00
ATOM    284  O   GLU    17      35.271  72.357  83.311  0.00  0.00
ATOM    285  N   TRP    18      35.439  70.142  83.153  0.00  0.00
ATOM    286  H   TRP    18      35.946  69.363  83.501  0.00  0.00
ATOM    287  CA  TRP    18      34.431  69.858  82.124  0.00  0.00
ATOM    288  HA  TRP    18      34.424  68.786  82.021  0.00  0.00
ATOM    289  CB  TRP    18      34.881  70.390  80.771  0.00  0.00
ATOM    290  HB2 TRP    18      34.315  69.905  80.003  0.00  0.00
ATOM    291  HB3 TRP    18      34.643  71.434  80.724  0.00  0.00
ATOM    292  CG  TRP    18      36.325  70.228  80.451  0.00  0.00
ATOM    293  CD1 TRP    18      37.192  71.212  80.340  0.00  0.00
ATOM    294  HD1 TRP    18      36.938  72.227  80.465  0.00  0.00
ATOM    295  NE1 TRP    18      38.443  70.712  80.139  0.00  0.00
ATOM    296  HE1 TRP    18      39.241  71.266  80.074  0.00  0.00
ATOM    297  CE2 TRP    18      38.454  69.374  80.091  0.00  0.00
ATOM    298  CZ2 TRP    18      39.469  68.441  79.927  0.00  0.00
ATOM    299  HZ2 TRP    18      40.469  68.745  79.792  0.00  0.00
ATOM    300  CH2 TRP    18      39.152  67.111  79.913  0.00  0.00
ATOM    301  HH2 TRP    18      39.913  66.384  79.776  0.00  0.00
ATOM    302  CZ3 TRP    18      37.845  66.733  80.088  0.00  0.00
ATOM    303  HZ3 TRP    18      37.619  65.712  80.071  0.00  0.00
ATOM    304  CE3 TRP    18      36.841  67.681  80.278  0.00  0.00
ATOM    305  HE3 TRP    18      35.845  67.358  80.414  0.00  0.00
ATOM    306  CD2 TRP    18      37.110  69.027  80.279  0.00  0.00
ATOM    307  C   TRP    18      32.981  70.223  82.464  0.00  0.00
ATOM    308  O   TRP    18      32.094  69.927  81.703  0.00  0.00
ATOM    309  N   ALA    19      32.720  70.816  83.608  0.00  0.00
ATOM    310  H   ALA    19      33.506  71.071  84.132  0.00  0.00
ATOM    311  CA  ALA    19      31.430  70.948  84.262  0.00  0.00
ATOM    312  HA  ALA    19      31.053  69.980  84.435  0.00  0.00
ATOM    313  CB  ALA    19      31.670  71.564  85.604  0.00  0.00
ATOM    314  HB1 ALA    19      31.836  71.838  85.839  0.00  0.00
ATOM    315  HB2 ALA    19      31.525  71.729  85.922  0.00  0.00
ATOM    316  HB3 ALA    19      31.797  71.551  86.024  0.00  0.00
ATOM    317  C   ALA    19      30.321  71.693  83.509  0.00  0.00
ATOM    318  O   ALA    19      29.233  71.701  83.951  0.00  0.00
ATOM    319  N   ASP    20      30.562  72.300  82.385  0.00  0.00
ATOM    320  H   ASP    20      31.479  72.297  82.110  0.00  0.00
ATOM    321  CA  ASP    20      29.595  73.001  81.543  0.00  0.00
ATOM    322  HA  ASP    20      28.625  72.953  82.007  0.00  0.00
ATOM    323  CB  ASP    20      29.972  74.470  81.468  0.00  0.00
ATOM    324  HB2 ASP    20      29.168  75.001  81.002  0.00  0.00
ATOM    325  HB3 ASP    20      30.080  74.859  82.462  0.00  0.00
ATOM    326  CG  ASP    20      31.246  74.726  80.700  0.00  0.00
ATOM    327  OD1 ASP    20      32.298  74.387  81.175  0.00  0.00
ATOM    328  OD2 ASP    20      31.229  75.278  79.629  0.00  0.00
ATOM    329  C   ASP    20      29.418  72.374  80.154  0.00  0.00
ATOM    330  O   ASP    20      28.673  72.873  79.360  0.00  0.00
ATOM    331  N   ILE    21      30.064  71.269  79.864  0.00  0.00
ATOM    332  H   ILE    21      30.628  70.887  80.574  0.00  0.00
ATOM    333  CA  ILE    21      29.965  70.500  78.627  0.00  0.00
ATOM    334  HA  ILE    21      29.361  71.043  77.923  0.00  0.00
ATOM    335  CB  ILE    21      31.364  70.307  78.006  0.00  0.00
ATOM    336  HB  ILE    21      31.951  69.767  78.706  0.00  0.00
ATOM    337  CG2 ILE    21      31.300  69.494  76.732  0.00  0.00
ATOM    338 1HG2 ILE    21      31.281  69.335  76.362  0.00  0.00
ATOM    339 2HG2 ILE    21      31.357  69.264  76.426  0.00  0.00
ATOM    340 3HG2 ILE    21      31.231  69.270  76.470  0.00  0.00
ATOM    341  CG1 ILE    21      32.082  71.615  77.744  0.00  0.00
ATOM    342 2HG1 ILE    21      31.732  72.158  77.696  0.00  0.00
ATOM    343 3HG1 ILE    21      32.494  71.833  78.201  0.00  0.00
ATOM    344  CD1 ILE    21      32.743  71.954  76.961  0.00  0.00
ATOM    345 1HD1 ILE    21      32.876  72.013  76.750  0.00  0.00
ATOM    346 2HD1 ILE    21      32.899  72.085  76.782  0.00  0.00
ATOM    347 3HD1 ILE    21      32.927  72.043  76.785  0.00  0.00
ATOM    348  C   ILE    21      29.268  69.165  78.906  0.00  0.00
ATOM    349  O   ILE    21      29.591  68.498  79.806  0.00  0.00
ATOM    350  N   ASP    22      28.327  68.762  78.129  0.00  0.00
ATOM    351  H   ASP    22      28.098  69.350  77.420  0.00  0.00
ATOM    352  CA  ASP    22      27.669  67.461  78.157  0.00  0.00
ATOM    353  HA  ASP    22      27.715  67.070  79.159  0.00  0.00
ATOM    354  CB  ASP    22      26.199  67.667  77.829  0.00  0.00
ATOM    355  HB2 ASP    22      25.795  68.382  78.498  0.00  0.00
ATOM    356  HB3 ASP    22      26.100  68.055  76.852  0.00  0.00
ATOM    357  CG  ASP    22      25.406  66.402  77.945  0.00  0.00
ATOM    358  OD1 ASP    22      25.004  65.901  77.474  0.00  0.00
ATOM    359  OD2 ASP    22      25.178  65.907  78.510  0.00  0.00
ATOM    360  C   ASP    22      28.349  66.487  77.175  0.00  0.00
ATOM    361  O   ASP    22      28.368  66.774  75.991  0.00  0.00
ATOM    362  N   PRO    23      28.956  65.385  77.626  0.00  0.00
ATOM    363  CD  PRO    23      28.995  64.925  78.988  0.00  0.00
ATOM    364  HD2 PRO    23      28.016  64.845  79.400  0.00  0.00
ATOM    365  HD3 PRO    23      29.585  65.590  79.573  0.00  0.00
ATOM    366  CG  PRO    23      29.649  63.574  78.963  0.00  0.00
ATOM    367  HG2 PRO    23      28.941  62.854  78.921  0.00  0.00
ATOM    368  HG3 PRO    23      30.247  63.428  79.770  0.00  0.00
ATOM    369  CB  PRO    23      30.437  63.546  77.738  0.00  0.00
ATOM    370  HB2 PRO    23      30.464  62.604  77.363  0.00  0.00
ATOM    371  HB3 PRO    23      31.382  63.844  77.957  0.00  0.00
ATOM    372  CA  PRO    23      29.785  64.527  76.789  0.00  0.00
ATOM    373  HA  PRO    23      30.561  65.114  76.336  0.00  0.00
ATOM    374  C   PRO    23      29.037  63.812  75.665  0.00  0.00
ATOM    375  O   PRO    23      27.841  63.607  75.743  0.00  0.00
ATOM    376  N   VAL    24      29.757  63.373  74.639  0.00  0.00
ATOM    377  H   VAL    24      30.726  63.592  74.655  0.00  0.00
ATOM    378  CA  VAL    24      29.241  62.653  73.464  0.00  0.00
ATOM    379  HA  VAL    24      28.200  62.407  73.622  0.00  0.00
ATOM    380  CB  VAL    24      29.275  63.551  72.214  0.00  0.00
ATOM    381  HB  VAL    24      30.283  63.897  72.047  0.00  0.00
ATOM    382  CG1 VAL    24      28.792  62.835  70.952  0.00  0.00
ATOM    383 1HG1 VAL    24      28.848  62.446  70.684  0.00  0.00
ATOM    384 2HG1 VAL    24      28.420  62.660  70.737  0.00  0.00
ATOM    385 3HG1 VAL    24      28.766  62.878  70.488  0.00  0.00
ATOM    386  CG2 VAL    24      28.391  64.781  72.375  0.00  0.00
ATOM    387 1HG2 VAL    24      27.775  64.791  72.408  0.00  0.00
ATOM    388 2HG2 VAL    24      28.387  65.191  72.849  0.00  0.00
ATOM    389 3HG2 VAL    24      28.356  65.263  71.991  0.00  0.00
ATOM    390  C   VAL    24      30.017  61.335  73.261  0.00  0.00
ATOM    391  O   VAL    24      31.030  61.308  72.574  0.00  0.00
ATOM    392  N   PRO    25      29.581  60.231  73.875  0.00  0.00
ATOM    393  CD  PRO    25      28.567  60.175  74.892  0.00  0.00
ATOM    394  HD2 PRO    25      27.653  60.555  74.551  0.00  0.00
ATOM    395  HD3 PRO    25      28.863  60.709  75.744  0.00  0.00
ATOM    396  CG  PRO    25      28.411  58.740  75.230  0.00  0.00
ATOM    397  HG2 PRO    25      27.613  58.418  74.892  0.00  0.00
ATOM    398  HG3 PRO    25      28.443  58.612  76.154  0.00  0.00
ATOM    399  CB  PRO    25      29.442  58.003  74.656  0.00  0.00
ATOM    400  HB2 PRO    25      29.080  57.172  74.303  0.00  0.00
ATOM    401  HB3 PRO    25      30.084  57.791  75.350  0.00  0.00
ATOM    402  CA  PRO    25      30.066  58.888  73.589  0.00  0.00
ATOM    403  HA  PRO    25      31.135  58.854  73.691  0.00  0.00
ATOM    404  C   PRO    25      29.685  58.420  72.190  0.00  0.00
ATOM    405  O   PRO    25      28.778  58.934  71.578  0.00  0.00
ATOM    406  N   GLN    26      30.341  57.396  71.690  0.00  0.00
ATOM    407  H   GLN    26      31.063  57.009  72.244  0.00  0.00
ATOM    408  CA  GLN    26      30.013  56.717  70.450  0.00  0.00
ATOM    409  HA  GLN    26      29.695  57.449  69.736  0.00  0.00
ATOM    410  CB  GLN    26      31.241  56.030  69.894  0.00  0.00
ATOM    411  HB2 GLN    26      31.607  55.325  70.594  0.00  0.00
ATOM    412  HB3 GLN    26      30.951  55.491  69.020  0.00  0.00
ATOM    413  CG  GLN    26      32.364  56.993  69.539  0.00  0.00
ATOM    414  HG2 GLN    26      32.060  57.962  69.619  0.00  0.00
ATOM    415  HG3 GLN    26      33.135  56.860  70.197  0.00  0.00
ATOM    416  CD  GLN    26      32.898  56.838  68.186  0.00  0.00
ATOM    417  OE1 GLN    26      32.235  56.953  67.212  0.00  0.00
ATOM    418  NE2 GLN    26      34.119  56.574  68.055  0.00  0.00
ATOM    419 1HE2 GLN    26      34.498  56.489  67.169  0.00  0.00
ATOM    420 2HE2 GLN    26      34.707  56.449  68.827  0.00  0.00
ATOM    421  C   GLN    26      28.838  55.759  70.631  0.00  0.00
ATOM    422  O   GLN    26      28.992  54.566  70.556  0.00  0.00
ATOM    423  N   ASN    27      27.670  56.264  70.933  0.00  0.00
ATOM    424  H   ASN    27      27.611  57.245  70.957  0.00  0.00
ATOM    425  CA  ASN    27      26.482  55.511  71.252  0.00  0.00
ATOM    426  HA  ASN    27      26.710  54.888  72.093  0.00  0.00
ATOM    427  CB  ASN    27      25.395  56.479  71.691  0.00  0.00
ATOM    428  HB2 ASN    27      25.741  57.076  72.498  0.00  0.00
ATOM    429  HB3 ASN    27      25.141  57.128  70.901  0.00  0.00
ATOM    430  CG  ASN    27      24.169  55.787  72.139  0.00  0.00
ATOM    431  OD1 ASN    27      24.067  54.800  72.536  0.00  0.00
ATOM    432  ND2 ASN    27      23.187  56.277  72.090  0.00  0.00
ATOM    433 1HD2 ASN    27      22.379  55.832  72.384  0.00  0.00
ATOM    434 2HD2 ASN    27      23.258  57.093  71.789  0.00  0.00
ATOM    435  C   ASN    27      26.023  54.584  70.125  0.00  0.00
ATOM    436  O   ASN    27      25.559  55.005  69.116  0.00  0.00
ATOM    437  N   ASP    28      26.109  53.320  70.329  0.00  0.00
ATOM    438  H   ASP    28      26.500  53.068  71.173  0.00  0.00
ATOM    439  CA  ASP    28      25.704  52.239  69.428  0.00  0.00
ATOM    440  HA  ASP    28      25.495  52.656  68.467  0.00  0.00
ATOM    441  CB  ASP    28      26.855  51.275  69.239  0.00  0.00
ATOM    442  HB2 ASP    28      26.538  50.456  68.689  0.00  0.00
ATOM    443  HB3 ASP    28      27.573  51.747  68.670  0.00  0.00
ATOM    444  CG  ASP    28      27.539  50.779  70.468  0.00  0.00
ATOM    445  OD1 ASP    28      28.693  50.478  70.387  0.00  0.00
ATOM    446  OD2 ASP    28      26.994  50.756  71.523  0.00  0.00
ATOM    447  C   ASP    28      24.423  51.543  69.856  0.00  0.00
ATOM    448  O   ASP    28      24.052  50.564  69.273  0.00  0.00
ATOM    449  N   GLY    29      23.733  52.062  70.860  0.00  0.00
ATOM    450  H   GLY    29      24.124  52.855  71.271  0.00  0.00
ATOM    451  CA  GLY    29      22.492  51.652  71.435  0.00  0.00
ATOM    452  HA2 GLY    29      22.668  51.568  72.399  0.00  0.00
ATOM    453  HA3 GLY    29      21.849  52.396  71.333  0.00  0.00
ATOM    454  C   GLY    29      21.797  50.408  71.004  0.00  0.00
ATOM    455  O   GLY    29      21.932  49.421  71.651  0.00  0.00
ATOM    456  N   PRO    30      21.064  50.406  69.932  0.00  0.00
ATOM    457  CD  PRO    30      20.767  51.524  69.136  0.00  0.00
ATOM    458  HD2 PRO    30      21.613  51.922  68.671  0.00  0.00
ATOM    459  HD3 PRO    30      20.301  52.249  69.713  0.00  0.00
ATOM    460  CG  PRO    30      19.849  51.052  68.126  0.00  0.00
ATOM    461  HG2 PRO    30      20.302  51.064  67.356  0.00  0.00
ATOM    462  HG3 PRO    30      19.059  51.539  68.071  0.00  0.00
ATOM    463  CB  PRO    30      19.471  49.797  68.423  0.00  0.00
ATOM    464  HB2 PRO    30      19.545  49.250  67.695  0.00  0.00
ATOM    465  HB3 PRO    30      18.571  49.892  68.680  0.00  0.00
ATOM    466  CA  PRO    30      20.345  49.274  69.469  0.00  0.00
ATOM    467  HA  PRO    30      19.751  48.921  70.253  0.00  0.00
ATOM    468  C   PRO    30      21.176  48.115  68.913  0.00  0.00
ATOM    469  O   PRO    30      20.684  47.011  68.848  0.00  0.00
ATOM    470  N   SER    31      22.422  48.332  68.544  0.00  0.00
ATOM    471  H   SER    31      22.792  49.226  68.736  0.00  0.00
ATOM    472  CA  SER    31      23.269  47.388  67.813  0.00  0.00
ATOM    473  HA  SER    31      22.930  46.383  68.005  0.00  0.00
ATOM    474  CB  SER    31      23.151  47.620  66.307  0.00  0.00
ATOM    475  HB2 SER    31      23.428  48.629  66.072  0.00  0.00
ATOM    476  HB3 SER    31      23.805  46.953  65.773  0.00  0.00
ATOM    477  OG  SER    31      21.840  47.395  65.880  0.00  0.00
ATOM    478  HG  SER    31      21.745  46.496  65.734  0.00  0.00
ATOM    479  C   SER    31      24.739  47.424  68.268  0.00  0.00
ATOM    480  O   SER    31      25.599  47.837  67.503  0.00  0.00
ATOM    481  N   PRO    32      25.066  47.012  69.502  0.00  0.00
ATOM    482  CD  PRO    32      24.134  46.565  70.511  0.00  0.00
ATOM    483  HD2 PRO    32      23.521  45.774  70.162  0.00  0.00
ATOM    484  HD3 PRO    32      23.528  47.379  70.834  0.00  0.00
ATOM    485  CG  PRO    32      24.949  46.097  71.675  0.00  0.00
ATOM    486  HG2 PRO    32      25.155  45.079  71.575  0.00  0.00
ATOM    487  HG3 PRO    32      24.463  46.293  72.580  0.00  0.00
ATOM    488  CB  PRO    32      26.210  46.877  71.558  0.00  0.00
ATOM    489  HB2 PRO    32      27.014  46.414  72.061  0.00  0.00
ATOM    490  HB3 PRO    32      26.054  47.823  71.987  0.00  0.00
ATOM    491  CA  PRO    32      26.415  47.019  70.060  0.00  0.00
ATOM    492  HA  PRO    32      26.857  47.982  69.874  0.00  0.00
ATOM    493  C   PRO    32      27.369  45.969  69.472  0.00  0.00
ATOM    494  O   PRO    32      27.868  45.136  70.146  0.00  0.00
ATOM    495  N   VAL    33      27.620  45.979  68.214  0.00  0.00
ATOM    496  H   VAL    33      27.167  46.679  67.712  0.00  0.00
ATOM    497  CA  VAL    33      28.641  45.182  67.511  0.00  0.00
ATOM    498  HA  VAL    33      28.794  44.258  68.052  0.00  0.00
ATOM    499  CB  VAL    33      28.194  44.806  66.079  0.00  0.00
ATOM    500  HB  VAL    33      29.026  44.345  65.578  0.00  0.00
ATOM    501  CG1 VAL    33      27.081  43.789  66.090  0.00  0.00
ATOM    502 1HG1 VAL    33      26.927  43.432  66.134  0.00  0.00
ATOM    503 2HG1 VAL    33      26.744  43.633  66.202  0.00  0.00
ATOM    504 3HG1 VAL    33      26.778  43.551  65.929  0.00  0.00
ATOM    505  CG2 VAL    33      27.788  46.003  65.244  0.00  0.00
ATOM    506 1HG2 VAL    33      27.712  46.164  64.804  0.00  0.00
ATOM    507 2HG2 VAL    33      27.458  46.287  65.165  0.00  0.00
ATOM    508 3HG2 VAL    33      27.894  46.419  65.133  0.00  0.00
ATOM    509  C   VAL    33      29.999  45.887  67.488  0.00  0.00
ATOM    510  O   VAL    33      30.083  47.098  67.630  0.00  0.00
ATOM    511  N   VAL    34      31.075  45.123  67.289  0.00  0.00
ATOM    512  H   VAL    34      30.895  44.148  67.174  0.00  0.00
ATOM    513  CA  VAL    34      32.485  45.560  67.213  0.00  0.00
ATOM    514  HA  VAL    34      33.079  44.692  67.469  0.00  0.00
ATOM    515  CB  VAL    34      32.902  45.930  65.771  0.00  0.00
ATOM    516  HB  VAL    34      33.941  46.221  65.792  0.00  0.00
ATOM    517  CG1 VAL    34      32.806  44.745  64.818  0.00  0.00
ATOM    518 1HG1 VAL    34      32.259  44.321  64.814  0.00  0.00
ATOM    519 2HG1 VAL    34      32.824  44.838  64.123  0.00  0.00
ATOM    520 3HG1 VAL    34      33.294  44.231  64.810  0.00  0.00
ATOM    521  CG2 VAL    34      32.117  47.072  65.138  0.00  0.00
ATOM    522 1HG2 VAL    34      31.933  47.367  65.014  0.00  0.00
ATOM    523 2HG2 VAL    34      31.943  47.370  64.961  0.00  0.00
ATOM    524 3HG2 VAL    34      31.907  47.330  64.975  0.00  0.00
ATOM    525  C   VAL    34      32.895  46.623  68.250  0.00  0.00
ATOM    526  O   VAL    34      33.589  47.570  67.931  0.00  0.00
ATOM    527  N   GLN    35      32.398  46.513  69.476  0.00  0.00
ATOM    528  H   GLN    35      31.839  45.716  69.680  0.00  0.00
ATOM    529  CA  GLN    35      32.560  47.517  70.527  0.00  0.00
ATOM    530  HA  GLN    35      32.377  48.492  70.098  0.00  0.00
ATOM    531  CB  GLN    35      31.516  47.294  71.619  0.00  0.00
ATOM    532  HB2 GLN    35      31.043  46.781  71.471  0.00  0.00
ATOM    533  HB3 GLN    35      31.741  47.084  72.290  0.00  0.00
ATOM    534  CG  GLN    35      30.803  48.073  72.003  0.00  0.00
ATOM    535  HG2 GLN    35      31.262  48.533  72.116  0.00  0.00
ATOM    536  HG3 GLN    35      30.575  48.236  71.400  0.00  0.00
ATOM    537  CD  GLN    35      29.769  48.010  73.070  0.00  0.00
ATOM    538  OE1 GLN    35      29.827  47.289  74.006  0.00  0.00
ATOM    539  NE2 GLN    35      28.775  48.737  72.975  0.00  0.00
ATOM    540 1HE2 GLN    35      28.118  48.685  73.685  0.00  0.00
ATOM    541 2HE2 GLN    35      28.660  49.318  72.197  0.00  0.00
ATOM    542  C   GLN    35      33.969  47.551  71.105  0.00  0.00
ATOM    543  O   GLN    35      34.475  46.575  71.571  0.00  0.00
ATOM    544  N   ILE    36      34.591  48.689  71.121  0.00  0.00
ATOM    545  H   ILE    36      34.108  49.440  70.747  0.00  0.00
ATOM    546  CA  ILE    36      35.875  48.967  71.761  0.00  0.00
ATOM    547  HA  ILE    36      36.527  48.112  71.651  0.00  0.00
ATOM    548  CB  ILE    36      36.548  50.191  71.116  0.00  0.00
ATOM    549  HB  ILE    36      35.920  51.043  71.278  0.00  0.00
ATOM    550  CG2 ILE    36      37.886  50.479  71.780  0.00  0.00
ATOM    551 1HG2 ILE    36      38.239  50.808  71.784  0.00  0.00
ATOM    552 2HG2 ILE    36      38.077  50.564  72.204  0.00  0.00
ATOM    553 3HG2 ILE    36      38.338  50.293  71.846  0.00  0.00
ATOM    554  CG1 ILE    36      36.759  50.027  69.616  0.00  0.00
ATOM    555 2HG1 ILE    36      37.526  49.404  69.427  0.00  0.00
ATOM    556 3HG1 ILE    36      35.941  49.632  69.199  0.00  0.00
ATOM    557  CD1 ILE    36      37.020  51.246  68.870  0.00  0.00
ATOM    558 1HD1 ILE    36      37.194  51.549  68.789  0.00  0.00
ATOM    559 2HD1 ILE    36      37.115  51.462  68.567  0.00  0.00
ATOM    560 3HD1 ILE    36      36.942  51.605  68.686  0.00  0.00
ATOM    561  C   ILE    36      35.642  49.200  73.252  0.00  0.00
ATOM    562  O   ILE    36      34.835  50.015  73.632  0.00  0.00
ATOM    563  N   ILE    37      36.362  48.497  74.097  0.00  0.00
ATOM    564  H   ILE    37      36.945  47.801  73.705  0.00  0.00
ATOM    565  CA  ILE    37      36.427  48.731  75.541  0.00  0.00
ATOM    566  HA  ILE    37      35.632  49.405  75.822  0.00  0.00
ATOM    567  CB  ILE    37      36.224  47.417  76.311  0.00  0.00
ATOM    568  HB  ILE    37      37.079  46.801  76.128  0.00  0.00
ATOM    569  CG2 ILE    37      36.193  47.671  77.799  0.00  0.00
ATOM    570 1HG2 ILE    37      36.195  47.865  78.139  0.00  0.00
ATOM    571 2HG2 ILE    37      36.068  47.650  78.167  0.00  0.00
ATOM    572 3HG2 ILE    37      36.306  47.660  78.190  0.00  0.00
ATOM    573  CG1 ILE    37      34.999  46.623  75.874  0.00  0.00
ATOM    574 2HG1 ILE    37      35.121  46.323  74.868  0.00  0.00
ATOM    575 3HG1 ILE    37      34.943  45.728  76.460  0.00  0.00
ATOM    576  CD1 ILE    37      33.680  47.322  75.988  0.00  0.00
ATOM    577 1HD1 ILE    37      33.328  47.466  76.140  0.00  0.00
ATOM    578 2HD1 ILE    37      33.407  47.582  75.978  0.00  0.00
ATOM    579 3HD1 ILE    37      33.309  47.409  75.931  0.00  0.00
ATOM    580  C   ILE    37      37.749  49.416  75.855  0.00  0.00
ATOM    581  O   ILE    37      38.774  48.886  75.598  0.00  0.00
ATOM    582  N   TYR    38      37.721  50.610  76.344  0.00  0.00
ATOM    583  H   TYR    38      36.853  50.929  76.577  0.00  0.00
ATOM    584  CA  TYR    38      38.809  51.583  76.334  0.00  0.00
ATOM    585  HA  TYR    38      39.413  51.399  75.460  0.00  0.00
ATOM    586  CB  TYR    38      38.223  52.993  76.217  0.00  0.00
ATOM    587  HB2 TYR    38      37.688  53.206  77.115  0.00  0.00
ATOM    588  HB3 TYR    38      39.032  53.682  76.156  0.00  0.00
ATOM    589  CG  TYR    38      37.322  53.279  75.038  0.00  0.00
ATOM    590  CD1 TYR    38      35.949  53.206  75.169  0.00  0.00
ATOM    591  HD1 TYR    38      35.532  52.889  76.088  0.00  0.00
ATOM    592  CE1 TYR    38      35.120  53.563  74.104  0.00  0.00
ATOM    593  HE1 TYR    38      34.073  53.509  74.202  0.00  0.00
ATOM    594  CZ  TYR    38      35.654  54.014  72.910  0.00  0.00
ATOM    595  OH  TYR    38      34.845  54.404  71.904  0.00  0.00
ATOM    596  HH  TYR    38      35.322  54.753  71.182  0.00  0.00
ATOM    597  CE2 TYR    38      37.026  54.067  72.773  0.00  0.00
ATOM    598  HE2 TYR    38      37.439  54.390  71.858  0.00  0.00
ATOM    599  CD2 TYR    38      37.859  53.702  73.834  0.00  0.00
ATOM    600  HD2 TYR    38      38.906  53.758  73.726  0.00  0.00
ATOM    601  C   TYR    38      39.773  51.554  77.536  0.00  0.00
ATOM    602  O   TYR    38      40.714  52.326  77.571  0.00  0.00
ATOM    603  N   SER    39      39.537  50.739  78.553  0.00  0.00
ATOM    604  H   SER    39      38.778  50.108  78.457  0.00  0.00
ATOM    605  CA  SER    39      40.210  50.784  79.864  0.00  0.00
ATOM    606  HA  SER    39      39.622  50.183  80.531  0.00  0.00
ATOM    607  CB  SER    39      41.583  50.142  79.801  0.00  0.00
ATOM    608  HB2 SER    39      42.229  50.719  79.197  0.00  0.00
ATOM    609  HB3 SER    39      42.001  50.108  80.775  0.00  0.00
ATOM    610  OG  SER    39      41.523  48.856  79.292  0.00  0.00
ATOM    611  HG  SER    39      41.669  48.872  78.456  0.00  0.00
ATOM    612  C   SER    39      40.243  52.168  80.516  0.00  0.00
ATOM    613  O   SER    39      41.173  52.495  81.218  0.00  0.00
ATOM    614  N   GLU    40      39.220  52.972  80.286  0.00  0.00
ATOM    615  H   GLU    40      38.507  52.569  79.728  0.00  0.00
ATOM    616  CA  GLU    40      38.904  54.298  80.832  0.00  0.00
ATOM    617  HA  GLU    40      38.067  54.651  80.265  0.00  0.00
ATOM    618  CB  GLU    40      38.397  54.181  82.254  0.00  0.00
ATOM    619  HB2 GLU    40      38.837  54.062  82.689  0.00  0.00
ATOM    620  HB3 GLU    40      38.122  54.712  82.526  0.00  0.00
ATOM    621  CG  GLU    40      37.638  53.559  82.740  0.00  0.00
ATOM    622  HG2 GLU    40      37.363  53.487  82.355  0.00  0.00
ATOM    623  HG3 GLU    40      37.842  53.173  82.700  0.00  0.00
ATOM    624  CD  GLU    40      36.961  53.560  83.807  0.00  0.00
ATOM    625  OE1 GLU    40      36.733  53.536  84.131  0.00  0.00
ATOM    626  OE2 GLU    40      36.653  53.589  84.326  0.00  0.00
ATOM    627  C   GLU    40      39.909  55.451  80.723  0.00  0.00
ATOM    628  O   GLU    40      39.486  56.585  80.684  0.00  0.00
ATOM    629  N   LYS    41      41.205  55.211  80.660  0.00  0.00
ATOM    630  H   LYS    41      41.461  54.254  80.687  0.00  0.00
ATOM    631  CA  LYS    41      42.291  56.187  80.839  0.00  0.00
ATOM    632  HA  LYS    41      42.195  56.566  81.832  0.00  0.00
ATOM    633  CB  LYS    41      43.631  55.488  80.791  0.00  0.00
ATOM    634  HB2 LYS    41      44.291  56.048  80.933  0.00  0.00
ATOM    635  HB3 LYS    41      43.689  54.890  81.431  0.00  0.00
ATOM    636  CG  LYS    41      44.020  54.835  79.758  0.00  0.00
ATOM    637  HG2 LYS    41      43.410  54.334  79.614  0.00  0.00
ATOM    638  HG3 LYS    41      44.022  55.374  79.158  0.00  0.00
ATOM    639  CD  LYS    41      45.272  54.117  79.741  0.00  0.00
ATOM    640  HD2 LYS    41      45.768  54.402  79.487  0.00  0.00
ATOM    641  HD3 LYS    41      45.489  53.977  80.299  0.00  0.00
ATOM    642  CE  LYS    41      45.532  53.187  79.281  0.00  0.00
ATOM    643  HE2 LYS    41      45.178  52.982  79.439  0.00  0.00
ATOM    644  HE3 LYS    41      45.392  53.267  78.872  0.00  0.00
ATOM    645  NZ  LYS    41      46.427  52.441  79.179  0.00  0.00
ATOM    646  HZ1 LYS    41      46.641  52.316  79.194  0.00  0.00
ATOM    647  HZ2 LYS    41      46.602  52.177  79.133  0.00  0.00
ATOM    648  HZ3 LYS    41      46.701  52.273  79.128  0.00  0.00
ATOM    649  C   LYS    41      42.273  57.434  79.965  0.00  0.00
ATOM    650  O   LYS    41      42.791  58.440  80.381  0.00  0.00
ATOM    651  N   PHE    42      41.646  57.406  78.808  0.00  0.00
ATOM    652  H   PHE    42      41.315  56.520  78.511  0.00  0.00
ATOM    653  CA  PHE    42      41.370  58.566  77.960  0.00  0.00
ATOM    654  HA  PHE    42      41.537  59.470  78.526  0.00  0.00
ATOM    655  CB  PHE    42      42.329  58.600  76.779  0.00  0.00
ATOM    656  HB2 PHE    42      42.324  57.646  76.296  0.00  0.00
ATOM    657  HB3 PHE    42      41.979  59.322  76.069  0.00  0.00
ATOM    658  CG  PHE    42      43.747  58.973  77.114  0.00  0.00
ATOM    659  CD1 PHE    42      44.722  58.004  77.200  0.00  0.00
ATOM    660  HD1 PHE    42      44.462  56.989  77.059  0.00  0.00
ATOM    661  CE1 PHE    42      46.042  58.364  77.462  0.00  0.00
ATOM    662  HE1 PHE    42      46.796  57.626  77.516  0.00  0.00
ATOM    663  CZ  PHE    42      46.380  59.691  77.646  0.00  0.00
ATOM    664  HZ  PHE    42      47.393  59.958  77.831  0.00  0.00
ATOM    665  CE2 PHE    42      45.403  60.665  77.572  0.00  0.00
ATOM    666  HE2 PHE    42      45.667  61.683  77.697  0.00  0.00
ATOM    667  CD2 PHE    42      44.090  60.301  77.308  0.00  0.00
ATOM    668  HD2 PHE    42      43.349  61.052  77.234  0.00  0.00
ATOM    669  C   PHE    42      39.914  58.651  77.494  0.00  0.00
ATOM    670  O   PHE    42      39.549  59.579  76.797  0.00  0.00
ATOM    671  N   ARG    43      39.034  57.739  77.910  0.00  0.00
ATOM    672  H   ARG    43      39.364  57.024  78.506  0.00  0.00
ATOM    673  CA  ARG    43      37.591  57.798  77.642  0.00  0.00
ATOM    674  HA  ARG    43      37.441  57.788  76.581  0.00  0.00
ATOM    675  CB  ARG    43      36.905  56.570  78.244  0.00  0.00
ATOM    676  HB2 ARG    43      37.461  55.701  77.973  0.00  0.00
ATOM    677  HB3 ARG    43      36.904  56.650  79.306  0.00  0.00
ATOM    678  CG  ARG    43      35.482  56.377  77.767  0.00  0.00
ATOM    679  HG2 ARG    43      34.923  57.263  77.898  0.00  0.00
ATOM    680  HG3 ARG    43      35.502  56.174  76.743  0.00  0.00
ATOM    681  CD  ARG    43      34.760  55.249  78.446  0.00  0.00
ATOM    682  HD2 ARG    43      33.873  55.043  77.907  0.00  0.00
ATOM    683  HD3 ARG    43      35.365  54.390  78.424  0.00  0.00
ATOM    684  NE  ARG    43      34.409  55.559  79.784  0.00  0.00
ATOM    685  HE  ARG    43      34.573  56.283  80.054  0.00  0.00
ATOM    686  CZ  ARG    43      33.854  55.000  80.675  0.00  0.00
ATOM    687  NH1 ARG    43      33.522  54.039  80.482  0.00  0.00
ATOM    688 1HH1 ARG    43      33.649  53.709  79.617  0.00  0.00
ATOM    689 2HH1 ARG    43      33.110  53.629  81.195  0.00  0.00
ATOM    690  NH2 ARG    43      33.615  55.394  81.803  0.00  0.00
ATOM    691 1HH2 ARG    43      33.818  56.136  81.967  0.00  0.00
ATOM    692 2HH2 ARG    43      33.153  54.983  82.469  0.00  0.00
ATOM    693  C   ARG    43      36.975  59.081  78.156  0.00  0.00
ATOM    694  O   ARG    43      36.214  59.695  77.456  0.00  0.00
ATOM    695  N   ASP    44      37.385  59.522  79.328  0.00  0.00
ATOM    696  H   ASP    44      38.002  58.943  79.818  0.00  0.00
ATOM    697  CA  ASP    44      37.034  60.797  79.912  0.00  0.00
ATOM    698  HA  ASP    44      35.974  60.854  79.943  0.00  0.00
ATOM    699  CB  ASP    44      37.542  60.857  81.315  0.00  0.00
ATOM    700  HB2 ASP    44      38.557  60.689  81.314  0.00  0.00
ATOM    701  HB3 ASP    44      37.399  61.814  81.682  0.00  0.00
ATOM    702  CG  ASP    44      36.890  59.904  82.253  0.00  0.00
ATOM    703  OD1 ASP    44      37.133  59.203  82.596  0.00  0.00
ATOM    704  OD2 ASP    44      36.128  59.861  82.684  0.00  0.00
ATOM    705  C   ASP    44      37.525  62.014  79.124  0.00  0.00
ATOM    706  O   ASP    44      37.139  63.010  79.296  0.00  0.00
ATOM    707  N   VAL    45      38.352  61.944  78.249  0.00  0.00
ATOM    708  H   VAL    45      38.628  61.099  78.180  0.00  0.00
ATOM    709  CA  VAL    45      38.859  62.982  77.353  0.00  0.00
ATOM    710  HA  VAL    45      38.626  63.951  77.766  0.00  0.00
ATOM    711  CB  VAL    45      40.384  62.888  77.211  0.00  0.00
ATOM    712  HB  VAL    45      40.653  61.920  76.922  0.00  0.00
ATOM    713  CG1 VAL    45      40.957  63.802  76.198  0.00  0.00
ATOM    714 1HG1 VAL    45      41.239  64.206  76.213  0.00  0.00
ATOM    715 2HG1 VAL    45      41.295  63.777  75.796  0.00  0.00
ATOM    716 3HG1 VAL    45      40.765  64.073  75.837  0.00  0.00
ATOM    717  CG2 VAL    45      41.083  63.178  78.493  0.00  0.00
ATOM    718 1HG2 VAL    45      41.346  63.206  78.752  0.00  0.00
ATOM    719 2HG2 VAL    45      41.231  63.361  78.810  0.00  0.00
ATOM    720 3HG2 VAL    45      41.189  63.169  78.850  0.00  0.00
ATOM    721  C   VAL    45      38.176  62.905  75.993  0.00  0.00
ATOM    722  O   VAL    45      37.700  63.907  75.505  0.00  0.00
ATOM    723  N   TYR    46      38.084  61.730  75.386  0.00  0.00
ATOM    724  H   TYR    46      38.489  60.934  75.825  0.00  0.00
ATOM    725  CA  TYR    46      37.502  61.548  74.060  0.00  0.00
ATOM    726  HA  TYR    46      37.997  62.221  73.376  0.00  0.00
ATOM    727  CB  TYR    46      37.720  60.114  73.569  0.00  0.00
ATOM    728  HB2 TYR    46      37.234  59.447  74.250  0.00  0.00
ATOM    729  HB3 TYR    46      37.240  60.024  72.615  0.00  0.00
ATOM    730  CG  TYR    46      39.133  59.617  73.386  0.00  0.00
ATOM    731  CD1 TYR    46      40.232  60.425  73.348  0.00  0.00
ATOM    732  HD1 TYR    46      40.097  61.422  73.452  0.00  0.00
ATOM    733  CE1 TYR    46      41.526  59.941  73.190  0.00  0.00
ATOM    734  HE1 TYR    46      42.358  60.566  73.178  0.00  0.00
ATOM    735  CZ  TYR    46      41.734  58.637  73.039  0.00  0.00
ATOM    736  OH  TYR    46      42.981  58.180  72.904  0.00  0.00
ATOM    737  HH  TYR    46      43.616  58.829  73.062  0.00  0.00
ATOM    738  CE2 TYR    46      40.635  57.831  73.032  0.00  0.00
ATOM    739  HE2 TYR    46      40.803  56.846  72.897  0.00  0.00
ATOM    740  CD2 TYR    46      39.342  58.316  73.221  0.00  0.00
ATOM    741  HD2 TYR    46      38.510  57.694  73.211  0.00  0.00
ATOM    742  C   TYR    46      36.008  61.895  74.010  0.00  0.00
ATOM    743  O   TYR    46      35.577  62.551  73.077  0.00  0.00
ATOM    744  N   ASP    47      35.233  61.520  75.022  0.00  0.00
ATOM    745  H   ASP    47      35.645  60.980  75.753  0.00  0.00
ATOM    746  CA  ASP    47      33.802  61.827  75.089  0.00  0.00
ATOM    747  HA  ASP    47      33.332  61.518  74.165  0.00  0.00
ATOM    748  CB  ASP    47      33.141  61.057  76.241  0.00  0.00
ATOM    749  HB2 ASP    47      33.630  61.311  77.159  0.00  0.00
ATOM    750  HB3 ASP    47      32.122  61.380  76.304  0.00  0.00
ATOM    751  CG  ASP    47      33.095  59.546  76.099  0.00  0.00
ATOM    752  OD1 ASP    47      33.410  59.012  75.035  0.00  0.00
ATOM    753  OD2 ASP    47      32.705  58.886  77.060  0.00  0.00
ATOM    754  C   ASP    47      33.533  63.335  75.223  0.00  0.00
ATOM    755  O   ASP    47      32.574  63.836  74.673  0.00  0.00
ATOM    756  N   TYR    48      34.390  64.077  75.906  0.00  0.00
ATOM    757  H   TYR    48      35.158  63.620  76.323  0.00  0.00
ATOM    758  CA  TYR    48      34.334  65.536  75.996  0.00  0.00
ATOM    759  HA  TYR    48      33.298  65.842  76.076  0.00  0.00
ATOM    760  CB  TYR    48      35.036  66.019  77.253  0.00  0.00
ATOM    761  HB2 TYR    48      35.178  67.074  77.169  0.00  0.00
ATOM    762  HB3 TYR    48      36.016  65.596  77.321  0.00  0.00
ATOM    763  CG  TYR    48      34.277  65.746  78.515  0.00  0.00
ATOM    764  CD1 TYR    48      34.479  64.594  79.201  0.00  0.00
ATOM    765  HD1 TYR    48      35.177  63.903  78.840  0.00  0.00
ATOM    766  CE1 TYR    48      33.776  64.340  80.358  0.00  0.00
ATOM    767  HE1 TYR    48      33.924  63.449  80.865  0.00  0.00
ATOM    768  CZ  TYR    48      32.866  65.245  80.836  0.00  0.00
ATOM    769  OH  TYR    48      32.178  65.011  81.946  0.00  0.00
ATOM    770  HH  TYR    48      32.397  64.201  82.306  0.00  0.00
ATOM    771  CE2 TYR    48      32.660  66.397  80.149  0.00  0.00
ATOM    772  HE2 TYR    48      31.963  67.080  80.523  0.00  0.00
ATOM    773  CD2 TYR    48      33.365  66.654  78.989  0.00  0.00
ATOM    774  HD2 TYR    48      33.211  67.539  78.466  0.00  0.00
ATOM    775  C   TYR    48      34.882  66.218  74.744  0.00  0.00
ATOM    776  O   TYR    48      34.325  67.209  74.306  0.00  0.00
ATOM    777  N   PHE    49      35.911  65.674  74.102  0.00  0.00
ATOM    778  H   PHE    49      36.367  64.887  74.509  0.00  0.00
ATOM    779  CA  PHE    49      36.398  66.173  72.813  0.00  0.00
ATOM    780  HA  PHE    49      36.620  67.224  72.931  0.00  0.00
ATOM    781  CB  PHE    49      37.692  65.464  72.407  0.00  0.00
ATOM    782  HB2 PHE    49      38.418  65.579  73.169  0.00  0.00
ATOM    783  HB3 PHE    49      37.522  64.425  72.307  0.00  0.00
ATOM    784  CG  PHE    49      38.248  65.978  71.135  0.00  0.00
ATOM    785  CD1 PHE    49      38.124  65.295  69.983  0.00  0.00
ATOM    786  HD1 PHE    49      37.677  64.375  69.980  0.00  0.00
ATOM    787  CE1 PHE    49      38.538  65.835  68.803  0.00  0.00
ATOM    788  HE1 PHE    49      38.433  65.311  67.922  0.00  0.00
ATOM    789  CZ  PHE    49      39.089  67.054  68.775  0.00  0.00
ATOM    790  HZ  PHE    49      39.379  67.466  67.862  0.00  0.00
ATOM    791  CE2 PHE    49      39.247  67.733  69.924  0.00  0.00
ATOM    792  HE2 PHE    49      39.656  68.671  69.905  0.00  0.00
ATOM    793  CD2 PHE    49      38.820  67.196  71.106  0.00  0.00
ATOM    794  HD2 PHE    49      38.889  67.736  71.982  0.00  0.00
ATOM    795  C   PHE    49      35.335  66.080  71.711  0.00  0.00
ATOM    796  O   PHE    49      35.108  67.049  71.001  0.00  0.00
ATOM    797  N   ARG    50      34.619  64.955  71.598  0.00  0.00
ATOM    798  H   ARG    50      34.864  64.176  72.175  0.00  0.00
ATOM    799  CA  ARG    50      33.492  64.799  70.667  0.00  0.00
ATOM    800  HA  ARG    50      33.839  65.055  69.674  0.00  0.00
ATOM    801  CB  ARG    50      33.011  63.338  70.632  0.00  0.00
ATOM    802  HB2 ARG    50      32.861  62.980  71.614  0.00  0.00
ATOM    803  HB3 ARG    50      32.088  63.285  70.115  0.00  0.00
ATOM    804  CG  ARG    50      33.967  62.426  69.924  0.00  0.00
ATOM    805  HG2 ARG    50      34.167  62.834  68.984  0.00  0.00
ATOM    806  HG3 ARG    50      34.869  62.416  70.443  0.00  0.00
ATOM    807  CD  ARG    50      33.455  61.003  69.744  0.00  0.00
ATOM    808  HD2 ARG    50      32.499  60.906  70.222  0.00  0.00
ATOM    809  HD3 ARG    50      33.312  60.825  68.699  0.00  0.00
ATOM    810  NE  ARG    50      34.378  59.996  70.262  0.00  0.00
ATOM    811  HE  ARG    50      35.164  59.768  69.703  0.00  0.00
ATOM    812  CZ  ARG    50      34.323  59.373  71.414  0.00  0.00
ATOM    813  NH1 ARG    50      33.426  59.647  72.306  0.00  0.00
ATOM    814 1HH1 ARG    50      32.778  60.392  72.171  0.00  0.00
ATOM    815 2HH1 ARG    50      33.488  59.242  73.217  0.00  0.00
ATOM    816  NH2 ARG    50      35.150  58.427  71.699  0.00  0.00
ATOM    817 1HH2 ARG    50      35.792  58.101  71.015  0.00  0.00
ATOM    818 2HH2 ARG    50      35.107  57.969  72.574  0.00  0.00
ATOM    819  C   ARG    50      32.336  65.769  70.932  0.00  0.00
ATOM    820  O   ARG    50      31.628  66.106  70.005  0.00  0.00
ATOM    821  N   ALA    51      32.166  66.264  72.147  0.00  0.00
ATOM    822  H   ALA    51      32.756  65.927  72.866  0.00  0.00
ATOM    823  CA  ALA    51      31.242  67.351  72.456  0.00  0.00
ATOM    824  HA  ALA    51      30.319  67.185  71.921  0.00  0.00
ATOM    825  CB  ALA    51      30.933  67.305  73.940  0.00  0.00
ATOM    826  HB1 ALA    51      31.143  67.353  74.347  0.00  0.00
ATOM    827  HB2 ALA    51      30.661  67.514  74.281  0.00  0.00
ATOM    828  HB3 ALA    51      30.764  67.025  74.257  0.00  0.00
ATOM    829  C   ALA    51      31.781  68.727  72.052  0.00  0.00
ATOM    830  O   ALA    51      31.059  69.499  71.440  0.00  0.00
ATOM    831  N   VAL    52      33.050  69.023  72.315  0.00  0.00
ATOM    832  H   VAL    52      33.575  68.354  72.837  0.00  0.00
ATOM    833  CA  VAL    52      33.736  70.258  71.909  0.00  0.00
ATOM    834  HA  VAL    52      33.219  71.102  72.343  0.00  0.00
ATOM    835  CB  VAL    52      35.173  70.255  72.453  0.00  0.00
ATOM    836  HB  VAL    52      35.611  69.296  72.268  0.00  0.00
ATOM    837  CG1 VAL    52      36.082  71.274  71.836  0.00  0.00
ATOM    838 1HG1 VAL    52      36.080  71.610  71.545  0.00  0.00
ATOM    839 2HG1 VAL    52      36.375  71.634  71.933  0.00  0.00
ATOM    840 3HG1 VAL    52      36.477  71.310  71.571  0.00  0.00
ATOM    841  CG2 VAL    52      35.173  70.486  73.948  0.00  0.00
ATOM    842 1HG2 VAL    52      35.061  70.427  74.331  0.00  0.00
ATOM    843 2HG2 VAL    52      35.324  70.496  74.343  0.00  0.00
ATOM    844 3HG2 VAL    52      35.138  70.692  74.277  0.00  0.00
ATOM    845  C   VAL    52      33.677  70.481  70.398  0.00  0.00
ATOM    846  O   VAL    52      33.478  71.606  69.964  0.00  0.00
ATOM    847  N   LEU    53      33.734  69.422  69.597  0.00  0.00
ATOM    848  H   LEU    53      33.906  68.534  70.019  0.00  0.00
ATOM    849  CA  LEU    53      33.570  69.475  68.142  0.00  0.00
ATOM    850  HA  LEU    53      34.291  70.174  67.746  0.00  0.00
ATOM    851  CB  LEU    53      33.835  68.086  67.560  0.00  0.00
ATOM    852  HB2 LEU    53      33.385  67.409  68.126  0.00  0.00
ATOM    853  HB3 LEU    53      33.425  68.009  66.655  0.00  0.00
ATOM    854  CG  LEU    53      35.202  67.659  67.403  0.00  0.00
ATOM    855  HG  LEU    53      35.539  67.687  68.273  0.00  0.00
ATOM    856  CD1 LEU    53      35.340  66.396  66.881  0.00  0.00
ATOM    857 1HD1 LEU    53      35.089  66.025  66.814  0.00  0.00
ATOM    858 2HD1 LEU    53      35.458  66.186  66.451  0.00  0.00
ATOM    859 3HD1 LEU    53      35.575  66.039  67.000  0.00  0.00
ATOM    860  CD2 LEU    53      35.991  68.362  66.556  0.00  0.00
ATOM    861 1HD2 LEU    53      36.052  68.549  66.231  0.00  0.00
ATOM    862 2HD2 LEU    53      36.220  68.654  66.451  0.00  0.00
ATOM    863 3HD2 LEU    53      36.291  68.388  66.374  0.00  0.00
ATOM    864  C   LEU    53      32.208  69.986  67.657  0.00  0.00
ATOM    865  O   LEU    53      32.091  70.301  66.504  0.00  0.00
ATOM    866  N   GLN    54      31.194  70.098  68.498  0.00  0.00
ATOM    867  H   GLN    54      31.348  69.829  69.437  0.00  0.00
ATOM    868  CA  GLN    54      29.845  70.545  68.140  0.00  0.00
ATOM    869  HA  GLN    54      29.894  71.026  67.178  0.00  0.00
ATOM    870  CB  GLN    54      28.922  69.336  67.981  0.00  0.00
ATOM    871  HB2 GLN    54      27.947  69.677  67.681  0.00  0.00
ATOM    872  HB3 GLN    54      29.298  68.712  67.197  0.00  0.00
ATOM    873  CG  GLN    54      28.767  68.476  69.223  0.00  0.00
ATOM    874  HG2 GLN    54      29.690  68.029  69.476  0.00  0.00
ATOM    875  HG3 GLN    54      28.462  69.079  70.027  0.00  0.00
ATOM    876  CD  GLN    54      27.770  67.396  69.045  0.00  0.00
ATOM    877  OE1 GLN    54      26.831  67.401  69.106  0.00  0.00
ATOM    878  NE2 GLN    54      27.927  66.434  68.805  0.00  0.00
ATOM    879 1HE2 GLN    54      27.287  65.738  68.659  0.00  0.00
ATOM    880 2HE2 GLN    54      28.705  66.397  68.764  0.00  0.00
ATOM    881  C   GLN    54      29.297  71.628  69.069  0.00  0.00
ATOM    882  O   GLN    54      28.124  71.813  69.176  0.00  0.00
ATOM    883  N   ARG    55      30.155  72.354  69.738  0.00  0.00
ATOM    884  H   ARG    55      31.095  72.141  69.588  0.00  0.00
ATOM    885  CA  ARG    55      29.858  73.482  70.631  0.00  0.00
ATOM    886  HA  ARG    55      28.817  73.749  70.545  0.00  0.00
ATOM    887  CB  ARG    55      30.145  73.066  72.072  0.00  0.00
ATOM    888  HB2 ARG    55      31.121  72.638  72.128  0.00  0.00
ATOM    889  HB3 ARG    55      30.137  73.936  72.693  0.00  0.00
ATOM    890  CG  ARG    55      29.157  72.085  72.655  0.00  0.00
ATOM    891  HG2 ARG    55      28.817  71.741  72.292  0.00  0.00
ATOM    892  HG3 ARG    55      29.343  71.591  73.019  0.00  0.00
ATOM    893  CD  ARG    55      28.399  72.222  73.292  0.00  0.00
ATOM    894  HD2 ARG    55      28.653  72.299  73.684  0.00  0.00
ATOM    895  HD3 ARG    55      28.334  72.817  73.110  0.00  0.00
ATOM    896  NE  ARG    55      27.442  71.469  73.624  0.00  0.00
ATOM    897  HE  ARG    55      27.318  70.848  73.477  0.00  0.00
ATOM    898  CZ  ARG    55      26.682  71.528  74.075  0.00  0.00
ATOM    899  NH1 ARG    55      26.698  72.272  74.324  0.00  0.00
ATOM    900 1HH1 ARG    55      27.288  72.871  74.174  0.00  0.00
ATOM    901 2HH1 ARG    55      26.099  72.263  74.655  0.00  0.00
ATOM    902  NH2 ARG    55      25.866  70.804  74.295  0.00  0.00
ATOM    903 1HH2 ARG    55      25.778  70.223  74.109  0.00  0.00
ATOM    904 2HH2 ARG    55      25.291  70.866  74.616  0.00  0.00
ATOM    905  C   ARG    55      30.635  74.734  70.249  0.00  0.00
ATOM    906  O   ARG    55      31.571  74.673  69.491  0.00  0.00
ATOM    907  N   ASP    56      30.254  75.871  70.784  0.00  0.00
ATOM    908  H   ASP    56      29.488  75.817  71.398  0.00  0.00
ATOM    909  CA  ASP    56      30.799  77.201  70.516  0.00  0.00
ATOM    910  HA  ASP    56      30.855  77.316  69.465  0.00  0.00
ATOM    911  CB  ASP    56      29.835  78.238  71.029  0.00  0.00
ATOM    912  HB2 ASP    56      30.112  79.173  70.619  0.00  0.00
ATOM    913  HB3 ASP    56      28.862  78.015  70.675  0.00  0.00
ATOM    914  CG  ASP    56      29.785  78.352  72.493  0.00  0.00
ATOM    915  OD1 ASP    56      29.816  78.576  73.048  0.00  0.00
ATOM    916  OD2 ASP    56      29.696  78.226  73.097  0.00  0.00
ATOM    917  C   ASP    56      32.214  77.469  71.015  0.00  0.00
ATOM    918  O   ASP    56      32.666  78.569  70.949  0.00  0.00
ATOM    919  N   GLU    57      32.906  76.481  71.525  0.00  0.00
ATOM    920  H   GLU    57      32.479  75.613  71.483  0.00  0.00
ATOM    921  CA  GLU    57      34.225  76.555  72.117  0.00  0.00
ATOM    922  HA  GLU    57      34.181  77.229  72.955  0.00  0.00
ATOM    923  CB  GLU    57      34.631  75.180  72.651  0.00  0.00
ATOM    924  HB2 GLU    57      34.502  74.460  71.874  0.00  0.00
ATOM    925  HB3 GLU    57      35.669  75.185  72.902  0.00  0.00
ATOM    926  CG  GLU    57      33.850  74.723  73.860  0.00  0.00
ATOM    927  HG2 GLU    57      32.826  74.672  73.603  0.00  0.00
ATOM    928  HG3 GLU    57      34.157  73.748  74.125  0.00  0.00
ATOM    929  CD  GLU    57      34.029  75.609  75.057  0.00  0.00
ATOM    930  OE1 GLU    57      33.123  76.132  75.544  0.00  0.00
ATOM    931  OE2 GLU    57      35.058  75.791  75.560  0.00  0.00
ATOM    932  C   GLU    57      35.298  77.116  71.176  0.00  0.00
ATOM    933  O   GLU    57      35.786  76.493  70.337  0.00  0.00
ATOM    934  N   ARG    58      35.710  78.291  71.359  0.00  0.00
ATOM    935  H   ARG    58      35.218  78.728  72.022  0.00  0.00
ATOM    936  CA  ARG    58      36.815  79.023  70.751  0.00  0.00
ATOM    937  HA  ARG    58      37.354  78.361  70.096  0.00  0.00
ATOM    938  CB  ARG    58      36.232  80.162  69.922  0.00  0.00
ATOM    939  HB2 ARG    58      35.453  79.862  69.423  0.00  0.00
ATOM    940  HB3 ARG    58      35.912  80.872  70.500  0.00  0.00
ATOM    941  CG  ARG    58      37.067  80.743  68.978  0.00  0.00
ATOM    942  HG2 ARG    58      37.839  81.044  69.425  0.00  0.00
ATOM    943  HG3 ARG    58      37.357  80.066  68.399  0.00  0.00
ATOM    944  CD  ARG    58      36.457  81.835  68.198  0.00  0.00
ATOM    945  HD2 ARG    58      36.092  81.699  67.699  0.00  0.00
ATOM    946  HD3 ARG    58      36.034  82.220  68.491  0.00  0.00
ATOM    947  NE  ARG    58      36.906  82.564  67.729  0.00  0.00
ATOM    948  HE  ARG    58      37.245  82.455  67.732  0.00  0.00
ATOM    949  CZ  ARG    58      36.893  83.374  67.315  0.00  0.00
ATOM    950  NH1 ARG    58      36.483  83.640  67.239  0.00  0.00
ATOM    951 1HH1 ARG    58      36.147  83.210  67.512  0.00  0.00
ATOM    952 2HH1 ARG    58      36.491  84.257  66.897  0.00  0.00
ATOM    953  NH2 ARG    58      37.284  83.966  66.949  0.00  0.00
ATOM    954 1HH2 ARG    58      37.601  83.816  67.002  0.00  0.00
ATOM    955 2HH2 ARG    58      37.272  84.586  66.620  0.00  0.00
ATOM    956  C   ARG    58      37.786  79.466  71.827  0.00  0.00
ATOM    957  O   ARG    58      38.045  80.581  71.995  0.00  0.00
ATOM    958  N   SER    59      38.262  78.576  72.615  0.00  0.00
ATOM    959  H   SER    59      38.015  77.688  72.411  0.00  0.00
ATOM    960  CA  SER    59      38.900  78.777  73.893  0.00  0.00
ATOM    961  HA  SER    59      39.094  79.808  74.017  0.00  0.00
ATOM    962  CB  SER    59      37.941  78.384  74.963  0.00  0.00
ATOM    963  HB2 SER    59      38.377  78.559  75.901  0.00  0.00
ATOM    964  HB3 SER    59      37.062  78.978  74.876  0.00  0.00
ATOM    965  OG  SER    59      37.620  77.061  74.871  0.00  0.00
ATOM    966  HG  SER    59      36.819  76.930  75.224  0.00  0.00
ATOM    967  C   SER    59      40.210  78.023  74.050  0.00  0.00
ATOM    968  O   SER    59      40.469  77.030  73.393  0.00  0.00
ATOM    969  N   GLU    60      41.061  78.484  74.950  0.00  0.00
ATOM    970  H   GLU    60      40.805  79.291  75.466  0.00  0.00
ATOM    971  CA  GLU    60      42.335  77.845  75.250  0.00  0.00
ATOM    972  HA  GLU    60      42.873  77.730  74.326  0.00  0.00
ATOM    973  CB  GLU    60      43.158  78.742  76.158  0.00  0.00
ATOM    974  HB2 GLU    60      42.964  79.527  76.183  0.00  0.00
ATOM    975  HB3 GLU    60      43.129  78.552  76.924  0.00  0.00
ATOM    976  CG  GLU    60      44.287  78.841  75.978  0.00  0.00
ATOM    977  HG2 GLU    60      44.498  78.200  76.053  0.00  0.00
ATOM    978  HG3 GLU    60      44.270  78.892  75.299  0.00  0.00
ATOM    979  CD  GLU    60      45.165  79.728  76.602  0.00  0.00
ATOM    980  OE1 GLU    60      45.423  80.057  76.932  0.00  0.00
ATOM    981  OE2 GLU    60      45.613  80.098  76.773  0.00  0.00
ATOM    982  C   GLU    60      42.180  76.445  75.840  0.00  0.00
ATOM    983  O   GLU    60      42.972  75.575  75.516  0.00  0.00
ATOM    984  N   ARG    61      41.145  76.183  76.635  0.00  0.00
ATOM    985  H   ARG    61      40.572  76.944  76.911  0.00  0.00
ATOM    986  CA  ARG    61      40.827  74.841  77.131  0.00  0.00
ATOM    987  HA  ARG    61      41.708  74.481  77.645  0.00  0.00
ATOM    988  CB  ARG    61      39.703  74.867  78.180  0.00  0.00
ATOM    989  HB2 ARG    61      39.646  73.895  78.629  0.00  0.00
ATOM    990  HB3 ARG    61      39.976  75.558  78.949  0.00  0.00
ATOM    991  CG  ARG    61      38.318  75.231  77.667  0.00  0.00
ATOM    992  HG2 ARG    61      38.331  76.214  77.275  0.00  0.00
ATOM    993  HG3 ARG    61      38.040  74.557  76.897  0.00  0.00
ATOM    994  CD  ARG    61      37.276  75.153  78.746  0.00  0.00
ATOM    995  HD2 ARG    61      37.370  74.227  79.243  0.00  0.00
ATOM    996  HD3 ARG    61      37.472  75.911  79.452  0.00  0.00
ATOM    997  NE  ARG    61      35.919  75.296  78.233  0.00  0.00
ATOM    998  HE  ARG    61      35.823  75.513  77.283  0.00  0.00
ATOM    999  CZ  ARG    61      34.803  75.136  78.893  0.00  0.00
ATOM   1000  NH1 ARG    61      33.675  75.273  78.319  0.00  0.00
ATOM   1001 1HH1 ARG    61      33.640  75.544  77.372  0.00  0.00
ATOM   1002 2HH1 ARG    61      32.836  75.169  78.840  0.00  0.00
ATOM   1003  NH2 ARG    61      34.760  74.811  80.117  0.00  0.00
ATOM   1004 1HH2 ARG    61      35.583  74.805  80.648  0.00  0.00
ATOM   1005 2HH2 ARG    61      33.869  74.672  80.537  0.00  0.00
ATOM   1006  C   ARG    61      40.586  73.844  76.006  0.00  0.00
ATOM   1007  O   ARG    61      41.120  72.752  76.050  0.00  0.00
ATOM   1008  N   ALA    62      39.866  74.232  74.962  0.00  0.00
ATOM   1009  H   ALA    62      39.465  75.143  74.981  0.00  0.00
ATOM   1010  CA  ALA    62      39.657  73.407  73.787  0.00  0.00
ATOM   1011  HA  ALA    62      39.337  72.425  74.100  0.00  0.00
ATOM   1012  CB  ALA    62      38.542  74.008  72.955  0.00  0.00
ATOM   1013  HB1 ALA    62      38.381  73.984  72.482  0.00  0.00
ATOM   1014  HB2 ALA    62      38.046  74.005  72.961  0.00  0.00
ATOM   1015  HB3 ALA    62      38.390  74.464  72.817  0.00  0.00
ATOM   1016  C   ALA    62      40.934  73.216  72.969  0.00  0.00
ATOM   1017  O   ALA    62      41.187  72.136  72.459  0.00  0.00
ATOM   1018  N   PHE    63      41.778  74.237  72.872  0.00  0.00
ATOM   1019  H   PHE    63      41.514  75.102  73.283  0.00  0.00
ATOM   1020  CA  PHE    63      43.073  74.161  72.209  0.00  0.00
ATOM   1021  HA  PHE    63      42.917  73.779  71.211  0.00  0.00
ATOM   1022  CB  PHE    63      43.665  75.558  72.102  0.00  0.00
ATOM   1023  HB2 PHE    63      42.910  76.202  71.698  0.00  0.00
ATOM   1024  HB3 PHE    63      43.878  75.928  73.084  0.00  0.00
ATOM   1025  CG  PHE    63      44.895  75.710  71.253  0.00  0.00
ATOM   1026  CD1 PHE    63      44.839  75.517  69.889  0.00  0.00
ATOM   1027  HD1 PHE    63      43.936  75.210  69.452  0.00  0.00
ATOM   1028  CE1 PHE    63      45.952  75.752  69.092  0.00  0.00
ATOM   1029  HE1 PHE    63      45.899  75.623  68.047  0.00  0.00
ATOM   1030  CZ  PHE    63      47.132  76.158  69.663  0.00  0.00
ATOM   1031  HZ  PHE    63      47.986  76.331  69.059  0.00  0.00
ATOM   1032  CE2 PHE    63      47.195  76.329  71.025  0.00  0.00
ATOM   1033  HE2 PHE    63      48.097  76.628  71.465  0.00  0.00
ATOM   1034  CD2 PHE    63      46.077  76.117  71.816  0.00  0.00
ATOM   1035  HD2 PHE    63      46.135  76.270  72.854  0.00  0.00
ATOM   1036  C   PHE    63      44.015  73.177  72.911  0.00  0.00
ATOM   1037  O   PHE    63      44.572  72.322  72.249  0.00  0.00
ATOM   1038  N   LYS    64      44.130  73.216  74.236  0.00  0.00
ATOM   1039  H   LYS    64      43.668  73.957  74.713  0.00  0.00
ATOM   1040  CA  LYS    64      44.912  72.250  75.021  0.00  0.00
ATOM   1041  HA  LYS    64      45.920  72.231  74.639  0.00  0.00
ATOM   1042  CB  LYS    64      44.968  72.711  76.472  0.00  0.00
ATOM   1043  HB2 LYS    64      44.296  73.074  76.750  0.00  0.00
ATOM   1044  HB3 LYS    64      45.080  72.113  77.006  0.00  0.00
ATOM   1045  CG  LYS    64      45.805  73.474  76.826  0.00  0.00
ATOM   1046  HG2 LYS    64      46.465  73.094  76.625  0.00  0.00
ATOM   1047  HG3 LYS    64      45.757  74.044  76.244  0.00  0.00
ATOM   1048  CD  LYS    64      45.843  74.001  78.210  0.00  0.00
ATOM   1049  HD2 LYS    64      45.903  74.266  78.413  0.00  0.00
ATOM   1050  HD3 LYS    64      45.671  74.086  78.509  0.00  0.00
ATOM   1051  CE  LYS    64      46.025  74.078  78.895  0.00  0.00
ATOM   1052  HE2 LYS    64      46.016  74.042  78.817  0.00  0.00
ATOM   1053  HE3 LYS    64      45.951  73.920  78.704  0.00  0.00
ATOM   1054  NZ  LYS    64      46.325  74.395  79.903  0.00  0.00
ATOM   1055  HZ1 LYS    64      46.496  74.621  80.151  0.00  0.00
ATOM   1056  HZ2 LYS    64      46.233  74.439  80.206  0.00  0.00
ATOM   1057  HZ3 LYS    64      46.479  74.358  80.114  0.00  0.00
ATOM   1058  C   LYS    64      44.402  70.818  74.905  0.00  0.00
ATOM   1059  O   LYS    64      45.197  69.905  74.738  0.00  0.00
ATOM   1060  N   LEU    65      43.084  70.619  74.877  0.00  0.00
ATOM   1061  H   LEU    65      42.496  71.406  75.025  0.00  0.00
ATOM   1062  CA  LEU    65      42.441  69.307  74.749  0.00  0.00
ATOM   1063  HA  LEU    65      42.790  68.701  75.572  0.00  0.00
ATOM   1064  CB  LEU    65      40.924  69.509  74.879  0.00  0.00
ATOM   1065  HB2 LEU    65      40.724  70.176  75.684  0.00  0.00
ATOM   1066  HB3 LEU    65      40.572  69.971  73.993  0.00  0.00
ATOM   1067  CG  LEU    65      40.115  68.258  75.116  0.00  0.00
ATOM   1068  HG  LEU    65      40.301  67.583  74.331  0.00  0.00
ATOM   1069  CD1 LEU    65      40.447  67.594  76.392  0.00  0.00
ATOM   1070 1HD1 LEU    65      40.604  67.296  76.591  0.00  0.00
ATOM   1071 2HD1 LEU    65      40.627  67.578  76.775  0.00  0.00
ATOM   1072 3HD1 LEU    65      40.330  67.417  76.743  0.00  0.00
ATOM   1073  CD2 LEU    65      38.650  68.579  75.137  0.00  0.00
ATOM   1074 1HD2 LEU    65      38.272  68.653  75.104  0.00  0.00
ATOM   1075 2HD2 LEU    65      38.305  68.612  75.163  0.00  0.00
ATOM   1076 3HD2 LEU    65      38.285  68.689  75.162  0.00  0.00
ATOM   1077  C   LEU    65      42.831  68.560  73.467  0.00  0.00
ATOM   1078  O   LEU    65      42.899  67.343  73.461  0.00  0.00
ATOM   1079  N   THR    66      43.157  69.268  72.386  0.00  0.00
ATOM   1080  H   THR    66      43.049  70.256  72.439  0.00  0.00
ATOM   1081  CA  THR    66      43.670  68.671  71.143  0.00  0.00
ATOM   1082  HA  THR    66      42.977  67.902  70.834  0.00  0.00
ATOM   1083  CB  THR    66      43.779  69.666  69.983  0.00  0.00
ATOM   1084  HB  THR    66      44.152  69.148  69.115  0.00  0.00
ATOM   1085  CG2 THR    66      42.476  70.306  69.595  0.00  0.00
ATOM   1086 1HG2 THR    66      42.183  70.425  69.438  0.00  0.00
ATOM   1087 2HG2 THR    66      42.108  70.439  69.529  0.00  0.00
ATOM   1088 3HG2 THR    66      42.194  70.502  69.500  0.00  0.00
ATOM   1089  OG1 THR    66      44.678  70.680  70.265  0.00  0.00
ATOM   1090  HG1 THR    66      44.397  71.154  71.006  0.00  0.00
ATOM   1091  C   THR    66      45.014  67.962  71.279  0.00  0.00
ATOM   1092  O   THR    66      45.398  67.256  70.375  0.00  0.00
ATOM   1093  N   ARG    67      45.749  68.118  72.376  0.00  0.00
ATOM   1094  H   ARG    67      45.403  68.739  73.064  0.00  0.00
ATOM   1095  CA  ARG    67      46.983  67.369  72.674  0.00  0.00
ATOM   1096  HA  ARG    67      47.408  66.986  71.754  0.00  0.00
ATOM   1097  CB  ARG    67      48.020  68.278  73.338  0.00  0.00
ATOM   1098  HB2 ARG    67      47.614  68.707  74.234  0.00  0.00
ATOM   1099  HB3 ARG    67      48.854  67.673  73.635  0.00  0.00
ATOM   1100  CG  ARG    67      48.542  69.404  72.461  0.00  0.00
ATOM   1101  HG2 ARG    67      47.767  70.053  72.224  0.00  0.00
ATOM   1102  HG3 ARG    67      49.262  69.952  73.003  0.00  0.00
ATOM   1103  CD  ARG    67      49.193  68.952  71.218  0.00  0.00
ATOM   1104  HD2 ARG    67      49.750  68.113  71.434  0.00  0.00
ATOM   1105  HD3 ARG    67      48.447  68.682  70.564  0.00  0.00
ATOM   1106  NE  ARG    67      50.075  69.945  70.623  0.00  0.00
ATOM   1107  HE  ARG    67      50.745  70.352  71.224  0.00  0.00
ATOM   1108  CZ  ARG    67      50.111  70.376  69.394  0.00  0.00
ATOM   1109  NH1 ARG    67      50.934  71.309  69.070  0.00  0.00
ATOM   1110 1HH1 ARG    67      51.529  71.705  69.761  0.00  0.00
ATOM   1111 2HH1 ARG    67      50.851  71.712  68.169  0.00  0.00
ATOM   1112  NH2 ARG    67      49.349  69.962  68.443  0.00  0.00
ATOM   1113 1HH2 ARG    67      48.684  69.235  68.594  0.00  0.00
ATOM   1114 2HH2 ARG    67      49.472  70.336  67.528  0.00  0.00
ATOM   1115  C   ARG    67      46.717  66.143  73.536  0.00  0.00
ATOM   1116  O   ARG    67      47.222  65.091  73.213  0.00  0.00
ATOM   1117  N   ASP    68      45.862  66.251  74.547  0.00  0.00
ATOM   1118  H   ASP    68      45.487  67.148  74.745  0.00  0.00
ATOM   1119  CA  ASP    68      45.404  65.102  75.352  0.00  0.00
ATOM   1120  HA  ASP    68      46.259  64.630  75.812  0.00  0.00
ATOM   1121  CB  ASP    68      44.478  65.567  76.473  0.00  0.00
ATOM   1122  HB2 ASP    68      43.661  66.114  76.053  0.00  0.00
ATOM   1123  HB3 ASP    68      44.069  64.709  76.970  0.00  0.00
ATOM   1124  CG  ASP    68      45.178  66.427  77.493  0.00  0.00
ATOM   1125  OD1 ASP    68      45.557  66.604  77.996  0.00  0.00
ATOM   1126  OD2 ASP    68      45.349  66.931  77.787  0.00  0.00
ATOM   1127  C   ASP    68      44.704  64.040  74.507  0.00  0.00
ATOM   1128  O   ASP    68      44.890  62.849  74.703  0.00  0.00
ATOM   1129  N   ALA    69      43.929  64.463  73.512  0.00  0.00
ATOM   1130  H   ALA    69      43.773  65.442  73.438  0.00  0.00
ATOM   1131  CA  ALA    69      43.263  63.589  72.562  0.00  0.00
ATOM   1132  HA  ALA    69      42.668  62.888  73.125  0.00  0.00
ATOM   1133  CB  ALA    69      42.307  64.428  71.737  0.00  0.00
ATOM   1134  HB1 ALA    69      42.210  64.566  71.319  0.00  0.00
ATOM   1135  HB2 ALA    69      41.847  64.497  71.607  0.00  0.00
ATOM   1136  HB3 ALA    69      42.147  64.828  71.689  0.00  0.00
ATOM   1137  C   ALA    69      44.198  62.763  71.659  0.00  0.00
ATOM   1138  O   ALA    69      43.756  61.819  71.074  0.00  0.00
ATOM   1139  N   ILE    70      45.465  63.093  71.529  0.00  0.00
ATOM   1140  H   ILE    70      45.763  63.860  72.063  0.00  0.00
ATOM   1141  CA  ILE    70      46.446  62.435  70.648  0.00  0.00
ATOM   1142  HA  ILE    70      45.920  61.901  69.872  0.00  0.00
ATOM   1143  CB  ILE    70      47.318  63.496  69.955  0.00  0.00
ATOM   1144  HB  ILE    70      47.700  64.148  70.717  0.00  0.00
ATOM   1145  CG2 ILE    70      48.527  62.938  69.215  0.00  0.00
ATOM   1146 1HG2 ILE    70      49.091  63.127  69.252  0.00  0.00
ATOM   1147 2HG2 ILE    70      48.751  62.404  69.230  0.00  0.00
ATOM   1148 3HG2 ILE    70      48.639  62.907  68.620  0.00  0.00
ATOM   1149  CG1 ILE    70      46.520  64.376  68.999  0.00  0.00
ATOM   1150 2HG1 ILE    70      45.758  64.878  69.556  0.00  0.00
ATOM   1151 3HG1 ILE    70      47.166  65.134  68.614  0.00  0.00
ATOM   1152  CD1 ILE    70      45.869  63.687  67.829  0.00  0.00
ATOM   1153 1HD1 ILE    70      45.604  63.492  67.599  0.00  0.00
ATOM   1154 2HD1 ILE    70      45.704  63.622  67.475  0.00  0.00
ATOM   1155 3HD1 ILE    70      45.819  63.469  67.555  0.00  0.00
ATOM   1156  C   ILE    70      47.285  61.385  71.377  0.00  0.00
ATOM   1157  O   ILE    70      47.756  60.452  70.753  0.00  0.00
ATOM   1158  N   GLU    71      47.442  61.479  72.692  0.00  0.00
ATOM   1159  H   GLU    71      46.996  62.238  73.149  0.00  0.00
ATOM   1160  CA  GLU    71      48.357  60.668  73.510  0.00  0.00
ATOM   1161  HA  GLU    71      49.365  60.893  73.200  0.00  0.00
ATOM   1162  CB  GLU    71      48.222  61.073  74.975  0.00  0.00
ATOM   1163  HB2 GLU    71      47.196  61.003  75.255  0.00  0.00
ATOM   1164  HB3 GLU    71      48.765  60.381  75.587  0.00  0.00
ATOM   1165  CG  GLU    71      48.699  62.468  75.309  0.00  0.00
ATOM   1166  HG2 GLU    71      48.451  63.123  74.624  0.00  0.00
ATOM   1167  HG3 GLU    71      48.267  62.773  76.118  0.00  0.00
ATOM   1168  CD  GLU    71      50.066  62.600  75.516  0.00  0.00
ATOM   1169  OE1 GLU    71      50.673  62.584  75.685  0.00  0.00
ATOM   1170  OE2 GLU    71      50.552  62.725  75.501  0.00  0.00
ATOM   1171  C   GLU    71      48.228  59.134  73.388  0.00  0.00
ATOM   1172  O   GLU    71      49.161  58.442  73.707  0.00  0.00
ATOM   1173  N   LEU    72      47.104  58.605  72.915  0.00  0.00
ATOM   1174  H   LEU    72      46.357  59.236  72.780  0.00  0.00
ATOM   1175  CA  LEU    72      46.883  57.179  72.651  0.00  0.00
ATOM   1176  HA  LEU    72      47.845  56.703  72.614  0.00  0.00
ATOM   1177  CB  LEU    72      46.114  56.604  73.842  0.00  0.00
ATOM   1178  HB2 LEU    72      46.543  56.983  74.733  0.00  0.00
ATOM   1179  HB3 LEU    72      45.122  56.959  73.809  0.00  0.00
ATOM   1180  CG  LEU    72      46.068  55.106  73.961  0.00  0.00
ATOM   1181  HG  LEU    72      45.616  54.694  73.112  0.00  0.00
ATOM   1182  CD1 LEU    72      47.397  54.513  74.125  0.00  0.00
ATOM   1183 1HD1 LEU    72      47.729  54.360  74.302  0.00  0.00
ATOM   1184 2HD1 LEU    72      47.700  54.252  74.100  0.00  0.00
ATOM   1185 3HD1 LEU    72      47.727  54.473  74.094  0.00  0.00
ATOM   1186  CD2 LEU    72      45.241  54.691  75.127  0.00  0.00
ATOM   1187 1HD2 LEU    72      45.120  54.449  75.417  0.00  0.00
ATOM   1188 2HD2 LEU    72      45.078  54.720  75.488  0.00  0.00
ATOM   1189 3HD2 LEU    72      44.909  54.590  75.304  0.00  0.00
ATOM   1190  C   LEU    72      46.226  56.879  71.297  0.00  0.00
ATOM   1191  O   LEU    72      46.081  55.731  70.948  0.00  0.00
ATOM   1192  N   ASN    73      45.876  57.883  70.501  0.00  0.00
ATOM   1193  H   ASN    73      46.065  58.794  70.818  0.00  0.00
ATOM   1194  CA  ASN    73      45.328  57.742  69.149  0.00  0.00
ATOM   1195  HA  ASN    73      45.792  56.878  68.697  0.00  0.00
ATOM   1196  CB  ASN    73      43.825  57.461  69.227  0.00  0.00
ATOM   1197  HB2 ASN    73      43.649  56.600  69.851  0.00  0.00
ATOM   1198  HB3 ASN    73      43.319  58.297  69.671  0.00  0.00
ATOM   1199  CG  ASN    73      43.211  57.176  67.875  0.00  0.00
ATOM   1200  OD1 ASN    73      43.793  57.183  66.879  0.00  0.00
ATOM   1201  ND2 ASN    73      42.002  56.911  67.780  0.00  0.00
ATOM   1202 1HD2 ASN    73      41.621  56.692  66.891  0.00  0.00
ATOM   1203 2HD2 ASN    73      41.507  56.866  68.572  0.00  0.00
ATOM   1204  C   ASN    73      45.680  58.937  68.251  0.00  0.00
ATOM   1205  O   ASN    73      44.936  59.874  68.112  0.00  0.00
ATOM   1206  N   ALA    74      46.832  58.894  67.621  0.00  0.00
ATOM   1207  H   ALA    74      47.403  58.112  67.788  0.00  0.00
ATOM   1208  CA  ALA    74      47.283  59.875  66.634  0.00  0.00
ATOM   1209  HA  ALA    74      47.064  60.861  67.010  0.00  0.00
ATOM   1210  CB  ALA    74      48.788  59.751  66.500  0.00  0.00
ATOM   1211  HB1 ALA    74      49.189  59.589  66.706  0.00  0.00
ATOM   1212  HB2 ALA    74      49.109  59.563  66.226  0.00  0.00
ATOM   1213  HB3 ALA    74      49.160  59.995  66.448  0.00  0.00
ATOM   1214  C   ALA    74      46.585  59.776  65.270  0.00  0.00
ATOM   1215  O   ALA    74      46.701  60.673  64.465  0.00  0.00
ATOM   1216  N   ALA    75      45.872  58.705  64.979  0.00  0.00
ATOM   1217  H   ALA    75      45.825  58.005  65.668  0.00  0.00
ATOM   1218  CA  ALA    75      45.201  58.450  63.712  0.00  0.00
ATOM   1219  HA  ALA    75      45.838  58.796  62.920  0.00  0.00
ATOM   1220  CB  ALA    75      45.042  56.951  63.569  0.00  0.00
ATOM   1221  HB1 ALA    75      45.222  56.547  63.606  0.00  0.00
ATOM   1222  HB2 ALA    75      44.829  56.608  63.687  0.00  0.00
ATOM   1223  HB3 ALA    75      44.948  56.621  63.290  0.00  0.00
ATOM   1224  C   ALA    75      43.855  59.173  63.544  0.00  0.00
ATOM   1225  O   ALA    75      43.340  59.235  62.444  0.00  0.00
ATOM   1226  N   ASN    76      43.274  59.732  64.598  0.00  0.00
ATOM   1227  H   ASN    76      43.702  59.604  65.483  0.00  0.00
ATOM   1228  CA  ASN    76      42.007  60.451  64.539  0.00  0.00
ATOM   1229  HA  ASN    76      41.306  59.826  64.005  0.00  0.00
ATOM   1230  CB  ASN    76      41.460  60.653  65.953  0.00  0.00
ATOM   1231  HB2 ASN    76      41.414  59.695  66.442  0.00  0.00
ATOM   1232  HB3 ASN    76      42.122  61.287  66.515  0.00  0.00
ATOM   1233  CG  ASN    76      40.066  61.234  65.969  0.00  0.00
ATOM   1234  OD1 ASN    76      39.525  61.665  65.010  0.00  0.00
ATOM   1235  ND2 ASN    76      39.446  61.273  67.069  0.00  0.00
ATOM   1236 1HD2 ASN    76      38.552  61.676  67.100  0.00  0.00
ATOM   1237 2HD2 ASN    76      39.883  60.935  67.871  0.00  0.00
ATOM   1238  C   ASN    76      42.122  61.772  63.751  0.00  0.00
ATOM   1239  O   ASN    76      42.501  62.807  64.272  0.00  0.00
ATOM   1240  N   TYR    77      41.743  61.717  62.487  0.00  0.00
ATOM   1241  H   TYR    77      41.499  60.825  62.149  0.00  0.00
ATOM   1242  CA  TYR    77      41.718  62.804  61.521  0.00  0.00
ATOM   1243  HA  TYR    77      42.736  63.112  61.335  0.00  0.00
ATOM   1244  CB  TYR    77      41.160  62.256  60.198  0.00  0.00
ATOM   1245  HB2 TYR    77      41.108  63.073  59.498  0.00  0.00
ATOM   1246  HB3 TYR    77      41.870  61.542  59.816  0.00  0.00
ATOM   1247  CG  TYR    77      39.798  61.580  60.257  0.00  0.00
ATOM   1248  CD1 TYR    77      38.626  62.328  60.081  0.00  0.00
ATOM   1249  HD1 TYR    77      38.686  63.377  59.895  0.00  0.00
ATOM   1250  CE1 TYR    77      37.373  61.704  60.111  0.00  0.00
ATOM   1251  HE1 TYR    77      36.486  62.282  59.974  0.00  0.00
ATOM   1252  CZ  TYR    77      37.283  60.324  60.321  0.00  0.00
ATOM   1253  OH  TYR    77      36.078  59.711  60.335  0.00  0.00
ATOM   1254  HH  TYR    77      35.387  60.337  60.165  0.00  0.00
ATOM   1255  CE2 TYR    77      38.456  59.576  60.481  0.00  0.00
ATOM   1256  HE2 TYR    77      38.375  58.521  60.627  0.00  0.00
ATOM   1257  CD2 TYR    77      39.711  60.197  60.453  0.00  0.00
ATOM   1258  HD2 TYR    77      40.599  59.616  60.566  0.00  0.00
ATOM   1259  C   TYR    77      40.976  64.067  61.973  0.00  0.00
ATOM   1260  O   TYR    77      41.367  65.160  61.601  0.00  0.00
ATOM   1261  N   THR    78      39.936  63.956  62.790  0.00  0.00
ATOM   1262  H   THR    78      39.674  63.051  63.079  0.00  0.00
ATOM   1263  CA  THR    78      39.140  65.098  63.260  0.00  0.00
ATOM   1264  HA  THR    78      38.896  65.704  62.401  0.00  0.00
ATOM   1265  CB  THR    78      37.818  64.661  63.886  0.00  0.00
ATOM   1266  HB  THR    78      37.481  65.089  64.361  0.00  0.00
ATOM   1267  CG2 THR    78      36.943  64.443  63.336  0.00  0.00
ATOM   1268 1HG2 THR    78      36.845  64.412  63.136  0.00  0.00
ATOM   1269 2HG2 THR    78      36.565  64.316  63.190  0.00  0.00
ATOM   1270 3HG2 THR    78      36.769  64.434  63.296  0.00  0.00
ATOM   1271  OG1 THR    78      37.780  63.898  64.380  0.00  0.00
ATOM   1272  HG1 THR    78      37.914  63.518  64.105  0.00  0.00
ATOM   1273  C   THR    78      39.894  65.999  64.235  0.00  0.00
ATOM   1274  O   THR    78      39.715  67.202  64.215  0.00  0.00
ATOM   1275  N   VAL    79      40.782  65.447  65.059  0.00  0.00
ATOM   1276  H   VAL    79      40.910  64.462  64.994  0.00  0.00
ATOM   1277  CA  VAL    79      41.595  66.213  66.020  0.00  0.00
ATOM   1278  HA  VAL    79      40.939  66.835  66.616  0.00  0.00
ATOM   1279  CB  VAL    79      42.376  65.296  66.986  0.00  0.00
ATOM   1280  HB  VAL    79      43.118  64.760  66.430  0.00  0.00
ATOM   1281  CG1 VAL    79      43.075  66.104  68.060  0.00  0.00
ATOM   1282 1HG1 VAL    79      43.253  66.087  68.480  0.00  0.00
ATOM   1283 2HG1 VAL    79      43.449  66.342  68.164  0.00  0.00
ATOM   1284 3HG1 VAL    79      43.064  66.479  68.330  0.00  0.00
ATOM   1285  CG2 VAL    79      41.521  64.278  67.704  0.00  0.00
ATOM   1286 1HG2 VAL    79      41.263  63.992  67.827  0.00  0.00
ATOM   1287 2HG2 VAL    79      41.406  63.990  67.898  0.00  0.00
ATOM   1288 3HG2 VAL    79      41.295  64.090  67.938  0.00  0.00
ATOM   1289  C   VAL    79      42.563  67.135  65.288  0.00  0.00
ATOM   1290  O   VAL    79      42.674  68.295  65.642  0.00  0.00
ATOM   1291  N   TRP    80      43.236  66.652  64.252  0.00  0.00
ATOM   1292  H   TRP    80      43.116  65.696  64.018  0.00  0.00
ATOM   1293  CA  TRP    80      44.198  67.432  63.473  0.00  0.00
ATOM   1294  HA  TRP    80      44.891  67.897  64.162  0.00  0.00
ATOM   1295  CB  TRP    80      44.981  66.500  62.552  0.00  0.00
ATOM   1296  HB2 TRP    80      44.310  66.029  61.855  0.00  0.00
ATOM   1297  HB3 TRP    80      45.670  67.100  61.983  0.00  0.00
ATOM   1298  CG  TRP    80      45.775  65.449  63.249  0.00  0.00
ATOM   1299  CD1 TRP    80      45.519  64.133  63.238  0.00  0.00
ATOM   1300  HD1 TRP    80      44.706  63.675  62.717  0.00  0.00
ATOM   1301  NE1 TRP    80      46.460  63.477  63.990  0.00  0.00
ATOM   1302  HE1 TRP    80      46.475  62.488  64.120  0.00  0.00
ATOM   1303  CE2 TRP    80      47.364  64.339  64.536  0.00  0.00
ATOM   1304  CZ2 TRP    80      48.474  64.160  65.358  0.00  0.00
ATOM   1305  HZ2 TRP    80      48.774  63.179  65.660  0.00  0.00
ATOM   1306  CH2 TRP    80      49.191  65.276  65.777  0.00  0.00
ATOM   1307  HH2 TRP    80      50.044  65.158  66.411  0.00  0.00
ATOM   1308  CZ3 TRP    80      48.798  66.551  65.365  0.00  0.00
ATOM   1309  HZ3 TRP    80      49.347  67.407  65.686  0.00  0.00
ATOM   1310  CE3 TRP    80      47.686  66.714  64.535  0.00  0.00
ATOM   1311  HE3 TRP    80      47.398  67.695  64.219  0.00  0.00
ATOM   1312  CD2 TRP    80      46.942  65.616  64.096  0.00  0.00
ATOM   1313  C   TRP    80      43.535  68.563  62.685  0.00  0.00
ATOM   1314  O   TRP    80      44.051  69.672  62.666  0.00  0.00
ATOM   1315  N   HIE    81      42.363  68.325  62.106  0.00  0.00
ATOM   1316  H   HIE    81      42.016  67.394  62.124  0.00  0.00
ATOM   1317  CA  HIE    81      41.541  69.370  61.490  0.00  0.00
ATOM   1318  HA  HIE    81      42.127  69.861  60.726  0.00  0.00
ATOM   1319  CB  HIE    81      40.324  68.719  60.826  0.00  0.00
ATOM   1320  HB2 HIE    81      40.652  68.026  60.104  0.00  0.00
ATOM   1321  HB3 HIE    81      39.763  68.179  61.527  0.00  0.00
ATOM   1322  CG  HIE    81      39.417  69.659  60.168  0.00  0.00
ATOM   1323  ND1 HIE    81      39.103  70.113  59.423  0.00  0.00
ATOM   1324  CE1 HIE    81      38.293  70.909  59.034  0.00  0.00
ATOM   1325  HE1 HIE    81      37.859  71.424  58.444  0.00  0.00
ATOM   1326  NE2 HIE    81      38.079  70.970  59.474  0.00  0.00
ATOM   1327  HE2 HIE    81      37.512  71.503  59.308  0.00  0.00
ATOM   1328  CD2 HIE    81      38.782  70.196  60.209  0.00  0.00
ATOM   1329  HD2 HIE    81      38.825  70.035  60.720  0.00  0.00
ATOM   1330  C   HIE    81      41.139  70.446  62.502  0.00  0.00
ATOM   1331  O   HIE    81      41.385  71.618  62.280  0.00  0.00
ATOM   1332  N   PHE    82      40.610  70.064  63.665  0.00  0.00
ATOM   1333  H   PHE    82      40.457  69.091  63.817  0.00  0.00
ATOM   1334  CA  PHE    82      40.203  71.002  64.705  0.00  0.00
ATOM   1335  HA  PHE    82      39.560  71.738  64.243  0.00  0.00
ATOM   1336  CB  PHE    82      39.382  70.251  65.753  0.00  0.00
ATOM   1337  HB2 PHE    82      38.675  69.620  65.251  0.00  0.00
ATOM   1338  HB3 PHE    82      40.024  69.609  66.313  0.00  0.00
ATOM   1339  CG  PHE    82      38.608  71.134  66.684  0.00  0.00
ATOM   1340  CD1 PHE    82      37.557  71.873  66.224  0.00  0.00
ATOM   1341  HD1 PHE    82      37.304  71.815  65.210  0.00  0.00
ATOM   1342  CE1 PHE    82      36.831  72.679  67.089  0.00  0.00
ATOM   1343  HE1 PHE    82      36.042  73.255  66.729  0.00  0.00
ATOM   1344  CZ  PHE    82      37.138  72.743  68.411  0.00  0.00
ATOM   1345  HZ  PHE    82      36.573  73.359  69.065  0.00  0.00
ATOM   1346  CE2 PHE    82      38.174  72.002  68.868  0.00  0.00
ATOM   1347  HE2 PHE    82      38.407  72.050  69.884  0.00  0.00
ATOM   1348  CD2 PHE    82      38.908  71.207  68.010  0.00  0.00
ATOM   1349  HD2 PHE    82      39.703  70.643  68.373  0.00  0.00
ATOM   1350  C   PHE    82      41.378  71.779  65.322  0.00  0.00
ATOM   1351  O   PHE    82      41.249  72.962  65.607  0.00  0.00
ATOM   1352  N   ARG    83      42.556  71.163  65.451  0.00  0.00
ATOM   1353  H   ARG    83      42.592  70.187  65.252  0.00  0.00
ATOM   1354  CA  ARG    83      43.803  71.850  65.830  0.00  0.00
ATOM   1355  HA  ARG    83      43.650  72.318  66.794  0.00  0.00
ATOM   1356  CB  ARG    83      44.954  70.835  65.935  0.00  0.00
ATOM   1357  HB2 ARG    83      44.678  70.064  66.636  0.00  0.00
ATOM   1358  HB3 ARG    83      45.088  70.366  64.974  0.00  0.00
ATOM   1359  CG  ARG    83      46.309  71.409  66.371  0.00  0.00
ATOM   1360  HG2 ARG    83      47.048  70.648  66.288  0.00  0.00
ATOM   1361  HG3 ARG    83      46.602  72.206  65.730  0.00  0.00
ATOM   1362  CD  ARG    83      46.292  71.901  67.807  0.00  0.00
ATOM   1363  HD2 ARG    83      45.512  72.577  67.923  0.00  0.00
ATOM   1364  HD3 ARG    83      46.109  71.080  68.411  0.00  0.00
ATOM   1365  NE  ARG    83      47.509  72.552  68.250  0.00  0.00
ATOM   1366  HE  ARG    83      48.228  72.724  67.583  0.00  0.00
ATOM   1367  CZ  ARG    83      47.808  72.899  69.468  0.00  0.00
ATOM   1368  NH1 ARG    83      47.058  72.638  70.473  0.00  0.00
ATOM   1369 1HH1 ARG    83      46.223  72.131  70.356  0.00  0.00
ATOM   1370 2HH1 ARG    83      47.341  72.924  71.376  0.00  0.00
ATOM   1371  NH2 ARG    83      48.901  73.506  69.704  0.00  0.00
ATOM   1372 1HH2 ARG    83      49.509  73.677  68.953  0.00  0.00
ATOM   1373 2HH2 ARG    83      49.128  73.799  70.613  0.00  0.00
ATOM   1374  C   ARG    83      44.145  72.978  64.865  0.00  0.00
ATOM   1375  O   ARG    83      44.458  74.060  65.329  0.00  0.00
ATOM   1376  N   ARG    84      44.047  72.770  63.552  0.00  0.00
ATOM   1377  H   ARG    84      43.779  71.856  63.254  0.00  0.00
ATOM   1378  CA  ARG    84      44.301  73.802  62.527  0.00  0.00
ATOM   1379  HA  ARG    84      45.241  74.290  62.742  0.00  0.00
ATOM   1380  CB  ARG    84      44.395  73.161  61.138  0.00  0.00
ATOM   1381  HB2 ARG    84      43.562  72.497  60.988  0.00  0.00
ATOM   1382  HB3 ARG    84      44.348  73.933  60.390  0.00  0.00
ATOM   1383  CG  ARG    84      45.704  72.392  60.961  0.00  0.00
ATOM   1384  HG2 ARG    84      46.526  73.027  61.237  0.00  0.00
ATOM   1385  HG3 ARG    84      45.709  71.538  61.613  0.00  0.00
ATOM   1386  CD  ARG    84      45.936  71.924  59.525  0.00  0.00
ATOM   1387  HD2 ARG    84      45.910  72.778  58.874  0.00  0.00
ATOM   1388  HD3 ARG    84      46.918  71.488  59.446  0.00  0.00
ATOM   1389  NE  ARG    84      44.934  70.963  59.070  0.00  0.00
ATOM   1390  HE  ARG    84      44.164  71.321  58.564  0.00  0.00
ATOM   1391  CZ  ARG    84      44.968  69.658  59.164  0.00  0.00
ATOM   1392  NH1 ARG    84      45.883  69.031  59.803  0.00  0.00
ATOM   1393 1HH1 ARG    84      46.600  69.538  60.263  0.00  0.00
ATOM   1394 2HH1 ARG    84      45.918  68.037  59.727  0.00  0.00
ATOM   1395  NH2 ARG    84      44.053  68.951  58.606  0.00  0.00
ATOM   1396 1HH2 ARG    84      43.377  69.381  58.031  0.00  0.00
ATOM   1397 2HH2 ARG    84      44.022  67.973  58.744  0.00  0.00
ATOM   1398  C   ARG    84      43.273  74.932  62.536  0.00  0.00
ATOM   1399  O   ARG    84      43.663  76.073  62.408  0.00  0.00
ATOM   1400  N   VAL    85      41.996  74.639  62.753  0.00  0.00
ATOM   1401  H   VAL    85      41.744  73.678  62.796  0.00  0.00
ATOM   1402  CA  VAL    85      40.956  75.664  62.911  0.00  0.00
ATOM   1403  HA  VAL    85      41.000  76.313  62.055  0.00  0.00
ATOM   1404  CB  VAL    85      39.561  75.053  62.944  0.00  0.00
ATOM   1405  HB  VAL    85      39.450  74.626  63.553  0.00  0.00
ATOM   1406  CG1 VAL    85      38.648  75.708  62.955  0.00  0.00
ATOM   1407 1HG1 VAL    85      38.598  76.174  62.887  0.00  0.00
ATOM   1408 2HG1 VAL    85      38.278  75.744  62.700  0.00  0.00
ATOM   1409 3HG1 VAL    85      38.383  75.687  63.319  0.00  0.00
ATOM   1410  CG2 VAL    85      39.141  74.352  62.101  0.00  0.00
ATOM   1411 1HG2 VAL    85      38.967  74.197  61.842  0.00  0.00
ATOM   1412 2HG2 VAL    85      39.141  74.168  61.868  0.00  0.00
ATOM   1413 3HG2 VAL    85      39.012  74.146  61.966  0.00  0.00
ATOM   1414  C   VAL    85      41.214  76.541  64.128  0.00  0.00
ATOM   1415  O   VAL    85      41.235  77.753  64.003  0.00  0.00
ATOM   1416  N   LEU    86      41.476  75.962  65.295  0.00  0.00
ATOM   1417  H   LEU    86      41.463  74.967  65.353  0.00  0.00
ATOM   1418  CA  LEU    86      41.772  76.735  66.503  0.00  0.00
ATOM   1419  HA  LEU    86      41.016  77.500  66.604  0.00  0.00
ATOM   1420  CB  LEU    86      41.720  75.845  67.744  0.00  0.00
ATOM   1421  HB2 LEU    86      42.316  74.976  67.579  0.00  0.00
ATOM   1422  HB3 LEU    86      42.162  76.394  68.548  0.00  0.00
ATOM   1423  CG  LEU    86      40.334  75.413  68.200  0.00  0.00
ATOM   1424  HG  LEU    86      39.926  74.849  67.526  0.00  0.00
ATOM   1425  CD1 LEU    86      40.421  74.673  69.338  0.00  0.00
ATOM   1426 1HD1 LEU    86      40.470  74.427  69.573  0.00  0.00
ATOM   1427 2HD1 LEU    86      40.504  74.554  69.585  0.00  0.00
ATOM   1428 3HD1 LEU    86      40.326  74.487  69.685  0.00  0.00
ATOM   1429  CD2 LEU    86      39.403  76.421  68.481  0.00  0.00
ATOM   1430 1HD2 LEU    86      39.156  76.615  68.710  0.00  0.00
ATOM   1431 2HD2 LEU    86      39.365  76.761  68.497  0.00  0.00
ATOM   1432 3HD2 LEU    86      38.975  76.609  68.418  0.00  0.00
ATOM   1433  C   LEU    86      43.102  77.500  66.433  0.00  0.00
ATOM   1434  O   LEU    86      43.167  78.606  66.932  0.00  0.00
ATOM   1435  N   LEU    87      44.133  76.973  65.775  0.00  0.00
ATOM   1436  H   LEU    87      44.024  76.052  65.411  0.00  0.00
ATOM   1437  CA  LEU    87      45.402  77.660  65.535  0.00  0.00
ATOM   1438  HA  LEU    87      45.840  77.858  66.502  0.00  0.00
ATOM   1439  CB  LEU    87      46.326  76.713  64.752  0.00  0.00
ATOM   1440  HB2 LEU    87      46.330  75.797  65.221  0.00  0.00
ATOM   1441  HB3 LEU    87      45.931  76.578  63.814  0.00  0.00
ATOM   1442  CG  LEU    87      47.746  77.095  64.565  0.00  0.00
ATOM   1443  HG  LEU    87      47.778  77.867  64.391  0.00  0.00
ATOM   1444  CD1 LEU    87      48.529  76.929  65.447  0.00  0.00
ATOM   1445 1HD1 LEU    87      48.674  76.884  65.723  0.00  0.00
ATOM   1446 2HD1 LEU    87      48.688  76.896  65.614  0.00  0.00
ATOM   1447 3HD1 LEU    87      48.795  76.919  65.650  0.00  0.00
ATOM   1448  CD2 LEU    87      48.384  76.543  63.686  0.00  0.00
ATOM   1449 1HD2 LEU    87      48.570  76.402  63.481  0.00  0.00
ATOM   1450 2HD2 LEU    87      48.495  76.405  63.441  0.00  0.00
ATOM   1451 3HD2 LEU    87      48.557  76.431  63.504  0.00  0.00
ATOM   1452  C   LEU    87      45.197  79.000  64.832  0.00  0.00
ATOM   1453  O   LEU    87      45.767  79.990  65.249  0.00  0.00
ATOM   1454  N   ARG    88      44.336  79.053  63.823  0.00  0.00
ATOM   1455  H   ARG    88      43.909  78.202  63.549  0.00  0.00
ATOM   1456  CA  ARG    88      43.939  80.288  63.145  0.00  0.00
ATOM   1457  HA  ARG    88      44.810  80.901  62.990  0.00  0.00
ATOM   1458  CB  ARG    88      43.333  79.956  61.787  0.00  0.00
ATOM   1459  HB2 ARG    88      43.245  79.259  61.587  0.00  0.00
ATOM   1460  HB3 ARG    88      42.672  80.183  61.674  0.00  0.00
ATOM   1461  CG  ARG    88      43.752  80.289  60.837  0.00  0.00
ATOM   1462  HG2 ARG    88      43.838  80.946  61.030  0.00  0.00
ATOM   1463  HG3 ARG    88      44.375  80.073  60.909  0.00  0.00
ATOM   1464  CD  ARG    88      43.233  80.036  59.516  0.00  0.00
ATOM   1465  HD2 ARG    88      43.076  79.661  59.298  0.00  0.00
ATOM   1466  HD3 ARG    88      42.840  80.190  59.312  0.00  0.00
ATOM   1467  NE  ARG    88      43.436  80.082  58.823  0.00  0.00
ATOM   1468  HE  ARG    88      43.671  80.065  59.031  0.00  0.00
ATOM   1469  CZ  ARG    88      43.338  80.178  57.926  0.00  0.00
ATOM   1470  NH1 ARG    88      43.032  80.210  57.511  0.00  0.00
ATOM   1471 1HH1 ARG    88      42.851  80.139  57.866  0.00  0.00
ATOM   1472 2HH1 ARG    88      42.964  80.290  56.820  0.00  0.00
ATOM   1473  NH2 ARG    88      43.548  80.263  57.407  0.00  0.00
ATOM   1474 1HH2 ARG    88      43.779  80.239  57.691  0.00  0.00
ATOM   1475 2HH2 ARG    88      43.456  80.350  56.714  0.00  0.00
ATOM   1476  C   ARG    88      42.998  81.145  63.976  0.00  0.00
ATOM   1477  O   ARG    88      43.243  82.325  64.116  0.00  0.00
ATOM   1478  N   SER    89      41.968  80.571  64.585  0.00  0.00
ATOM   1479  H   SER    89      41.822  79.607  64.411  0.00  0.00
ATOM   1480  CA  SER    89      40.952  81.283  65.373  0.00  0.00
ATOM   1481  HA  SER    89      40.553  82.084  64.771  0.00  0.00
ATOM   1482  CB  SER    89      39.805  80.354  65.728  0.00  0.00
ATOM   1483  HB2 SER    89      40.104  79.560  66.100  0.00  0.00
ATOM   1484  HB3 SER    89      39.224  80.719  66.363  0.00  0.00
ATOM   1485  OG  SER    89      39.089  80.050  64.790  0.00  0.00
ATOM   1486  HG  SER    89      38.714  79.520  64.831  0.00  0.00
ATOM   1487  C   SER    89      41.481  81.921  66.662  0.00  0.00
ATOM   1488  O   SER    89      40.877  82.827  67.171  0.00  0.00
ATOM   1489  N   LEU    90      42.614  81.489  67.177  0.00  0.00
ATOM   1490  H   LEU    90      43.004  80.682  66.766  0.00  0.00
ATOM   1491  CA  LEU    90      43.306  82.055  68.335  0.00  0.00
ATOM   1492  HA  LEU    90      42.688  82.821  68.781  0.00  0.00
ATOM   1493  CB  LEU    90      43.532  80.943  69.373  0.00  0.00
ATOM   1494  HB2 LEU    90      44.152  80.198  68.924  0.00  0.00
ATOM   1495  HB3 LEU    90      44.083  81.363  70.189  0.00  0.00
ATOM   1496  CG  LEU    90      42.300  80.261  69.935  0.00  0.00
ATOM   1497  HG  LEU    90      41.732  79.849  69.146  0.00  0.00
ATOM   1498  CD1 LEU    90      42.679  79.137  70.861  0.00  0.00
ATOM   1499 1HD1 LEU    90      42.783  78.582  70.782  0.00  0.00
ATOM   1500 2HD1 LEU    90      43.104  79.073  71.184  0.00  0.00
ATOM   1501 3HD1 LEU    90      42.418  78.923  71.280  0.00  0.00
ATOM   1502  CD2 LEU    90      41.439  81.195  70.700  0.00  0.00
ATOM   1503 1HD2 LEU    90      41.015  81.440  70.632  0.00  0.00
ATOM   1504 2HD2 LEU    90      41.183  81.187  71.115  0.00  0.00
ATOM   1505 3HD2 LEU    90      41.466  81.640  70.918  0.00  0.00
ATOM   1506  C   LEU    90      44.630  82.758  67.986  0.00  0.00
ATOM   1507  O   LEU    90      45.337  83.208  68.869  0.00  0.00
ATOM   1508  N   GLN    91      44.960  82.871  66.702  0.00  0.00
ATOM   1509  H   GLN    91      44.309  82.507  66.055  0.00  0.00
ATOM   1510  CA  GLN    91      46.171  83.499  66.166  0.00  0.00
ATOM   1511  HA  GLN    91      46.238  83.194  65.139  0.00  0.00
ATOM   1512  CB  GLN    91      46.025  85.019  66.159  0.00  0.00
ATOM   1513  HB2 GLN    91      45.871  85.378  67.089  0.00  0.00
ATOM   1514  HB3 GLN    91      46.896  85.431  65.848  0.00  0.00
ATOM   1515  CG  GLN    91      45.000  85.560  65.311  0.00  0.00
ATOM   1516  HG2 GLN    91      44.698  85.687  65.163  0.00  0.00
ATOM   1517  HG3 GLN    91      44.801  85.754  65.131  0.00  0.00
ATOM   1518  CD  GLN    91      44.636  85.723  64.885  0.00  0.00
ATOM   1519  OE1 GLN    91      44.898  85.955  65.035  0.00  0.00
ATOM   1520  NE2 GLN    91      44.030  85.622  64.349  0.00  0.00
ATOM   1521 1HE2 GLN    91      43.806  85.694  64.083  0.00  0.00
ATOM   1522 2HE2 GLN    91      43.819  85.430  64.228  0.00  0.00
ATOM   1523  C   GLN    91      47.477  83.014  66.814  0.00  0.00
ATOM   1524  O   GLN    91      48.377  83.769  67.059  0.00  0.00
ATOM   1525  N   LYS    92      47.581  81.750  67.123  0.00  0.00
ATOM   1526  H   LYS    92      46.835  81.185  66.833  0.00  0.00
ATOM   1527  CA  LYS    92      48.723  81.099  67.782  0.00  0.00
ATOM   1528  HA  LYS    92      49.120  81.779  68.512  0.00  0.00
ATOM   1529  CB  LYS    92      48.233  79.856  68.510  0.00  0.00
ATOM   1530  HB2 LYS    92      47.721  79.235  67.822  0.00  0.00
ATOM   1531  HB3 LYS    92      49.065  79.293  68.864  0.00  0.00
ATOM   1532  CG  LYS    92      47.303  80.124  69.669  0.00  0.00
ATOM   1533  HG2 LYS    92      46.738  80.727  69.465  0.00  0.00
ATOM   1534  HG3 LYS    92      46.820  79.424  69.866  0.00  0.00
ATOM   1535  CD  LYS    92      47.735  80.477  70.833  0.00  0.00
ATOM   1536  HD2 LYS    92      48.030  80.313  70.880  0.00  0.00
ATOM   1537  HD3 LYS    92      47.914  80.824  70.937  0.00  0.00
ATOM   1538  CE  LYS    92      47.491  80.556  71.803  0.00  0.00
ATOM   1539  HE2 LYS    92      46.955  80.707  71.739  0.00  0.00
ATOM   1540  HE3 LYS    92      47.465  79.969  71.779  0.00  0.00
ATOM   1541  NZ  LYS    92      47.979  81.187  72.862  0.00  0.00
ATOM   1542  HZ1 LYS    92      48.200  81.252  73.152  0.00  0.00
ATOM   1543  HZ2 LYS    92      48.130  81.445  73.044  0.00  0.00
ATOM   1544  HZ3 LYS    92      47.952  81.310  73.190  0.00  0.00
ATOM   1545  C   LYS    92      49.871  80.798  66.822  0.00  0.00
ATOM   1546  O   LYS    92      49.679  80.692  65.630  0.00  0.00
ATOM   1547  N   ASP    93      51.068  80.671  67.344  0.00  0.00
ATOM   1548  H   ASP    93      51.136  80.744  68.328  0.00  0.00
ATOM   1549  CA  ASP    93      52.311  80.513  66.589  0.00  0.00
ATOM   1550  HA  ASP    93      52.345  81.299  65.856  0.00  0.00
ATOM   1551  CB  ASP    93      53.498  80.719  67.514  0.00  0.00
ATOM   1552  HB2 ASP    93      53.401  81.629  68.001  0.00  0.00
ATOM   1553  HB3 ASP    93      53.504  79.983  68.240  0.00  0.00
ATOM   1554  CG  ASP    93      54.808  80.711  66.836  0.00  0.00
ATOM   1555  OD1 ASP    93      55.195  80.766  66.326  0.00  0.00
ATOM   1556  OD2 ASP    93      55.457  80.675  66.806  0.00  0.00
ATOM   1557  C   ASP    93      52.425  79.172  65.854  0.00  0.00
ATOM   1558  O   ASP    93      52.418  78.122  66.440  0.00  0.00
ATOM   1559  N   LEU    94      52.578  79.200  64.559  0.00  0.00
ATOM   1560  H   LEU    94      52.567  80.074  64.140  0.00  0.00
ATOM   1561  CA  LEU    94      52.778  78.030  63.717  0.00  0.00
ATOM   1562  HA  LEU    94      52.069  77.302  64.025  0.00  0.00
ATOM   1563  CB  LEU    94      52.467  78.368  62.288  0.00  0.00
ATOM   1564  HB2 LEU    94      52.548  78.230  62.052  0.00  0.00
ATOM   1565  HB3 LEU    94      52.199  78.385  62.059  0.00  0.00
ATOM   1566  CG  LEU    94      52.376  78.802  61.439  0.00  0.00
ATOM   1567  HG  LEU    94      52.434  78.370  61.475  0.00  0.00
ATOM   1568  CD1 LEU    94      52.016  79.255  61.162  0.00  0.00
ATOM   1569 1HD1 LEU    94      52.093  79.074  61.174  0.00  0.00
ATOM   1570 2HD1 LEU    94      51.897  79.490  61.093  0.00  0.00
ATOM   1571 3HD1 LEU    94      51.782  79.521  61.014  0.00  0.00
ATOM   1572  CD2 LEU    94      52.521  79.362  60.702  0.00  0.00
ATOM   1573 1HD2 LEU    94      52.745  79.487  60.470  0.00  0.00
ATOM   1574 2HD2 LEU    94      52.513  79.427  60.465  0.00  0.00
ATOM   1575 3HD2 LEU    94      52.403  79.607  60.618  0.00  0.00
ATOM   1576  C   LEU    94      54.143  77.348  63.855  0.00  0.00
ATOM   1577  O   LEU    94      54.232  76.160  63.598  0.00  0.00
ATOM   1578  N   GLN    95      55.194  78.047  64.271  0.00  0.00
ATOM   1579  H   GLN    95      55.062  79.007  64.502  0.00  0.00
ATOM   1580  CA  GLN    95      56.507  77.448  64.511  0.00  0.00
ATOM   1581  HA  GLN    95      56.774  76.833  63.668  0.00  0.00
ATOM   1582  CB  GLN    95      57.572  78.530  64.623  0.00  0.00
ATOM   1583  HB2 GLN    95      57.397  79.211  65.037  0.00  0.00
ATOM   1584  HB3 GLN    95      58.244  78.304  65.011  0.00  0.00
ATOM   1585  CG  GLN    95      58.016  78.978  63.647  0.00  0.00
ATOM   1586  HG2 GLN    95      58.216  78.327  63.267  0.00  0.00
ATOM   1587  HG3 GLN    95      57.377  79.208  63.257  0.00  0.00
ATOM   1588  CD  GLN    95      59.079  80.008  63.721  0.00  0.00
ATOM   1589  OE1 GLN    95      59.270  80.722  64.032  0.00  0.00
ATOM   1590  NE2 GLN    95      59.785  80.132  63.429  0.00  0.00
ATOM   1591 1HE2 GLN    95      60.465  80.804  63.480  0.00  0.00
ATOM   1592 2HE2 GLN    95      59.630  79.565  63.167  0.00  0.00
ATOM   1593  C   GLN    95      56.505  76.533  65.732  0.00  0.00
ATOM   1594  O   GLN    95      57.146  75.502  65.721  0.00  0.00
ATOM   1595  N   GLU    96      55.731  76.862  66.757  0.00  0.00
ATOM   1596  H   GLU    96      55.257  77.727  66.710  0.00  0.00
ATOM   1597  CA  GLU    96      55.468  75.988  67.899  0.00  0.00
ATOM   1598  HA  GLU    96      56.411  75.664  68.311  0.00  0.00
ATOM   1599  CB  GLU    96      54.728  76.756  68.994  0.00  0.00
ATOM   1600  HB2 GLU    96      54.636  77.472  68.906  0.00  0.00
ATOM   1601  HB3 GLU    96      54.033  76.566  69.109  0.00  0.00
ATOM   1602  CG  GLU    96      55.021  76.805  70.057  0.00  0.00
ATOM   1603  HG2 GLU    96      54.999  76.344  69.919  0.00  0.00
ATOM   1604  HG3 GLU    96      55.499  76.971  70.241  0.00  0.00
ATOM   1605  CD  GLU    96      54.703  77.271  71.049  0.00  0.00
ATOM   1606  OE1 GLU    96      54.580  77.361  71.564  0.00  0.00
ATOM   1607  OE2 GLU    96      54.589  77.550  71.332  0.00  0.00
ATOM   1608  C   GLU    96      54.704  74.725  67.510  0.00  0.00
ATOM   1609  O   GLU    96      54.957  73.681  68.046  0.00  0.00
ATOM   1610  N   GLU    97      53.808  74.793  66.546  0.00  0.00
ATOM   1611  H   GLU    97      53.639  75.679  66.146  0.00  0.00
ATOM   1612  CA  GLU    97      53.116  73.628  65.988  0.00  0.00
ATOM   1613  HA  GLU    97      52.766  73.018  66.811  0.00  0.00
ATOM   1614  CB  GLU    97      51.897  74.088  65.181  0.00  0.00
ATOM   1615  HB2 GLU    97      51.364  74.842  65.738  0.00  0.00
ATOM   1616  HB3 GLU    97      52.240  74.554  64.271  0.00  0.00
ATOM   1617  CG  GLU    97      50.927  72.970  64.794  0.00  0.00
ATOM   1618  HG2 GLU    97      50.179  73.385  64.138  0.00  0.00
ATOM   1619  HG3 GLU    97      51.458  72.211  64.244  0.00  0.00
ATOM   1620  CD  GLU    97      50.208  72.340  65.977  0.00  0.00
ATOM   1621  OE1 GLU    97      49.773  71.209  65.898  0.00  0.00
ATOM   1622  OE2 GLU    97      50.044  72.963  67.009  0.00  0.00
ATOM   1623  C   GLU    97      54.058  72.755  65.156  0.00  0.00
ATOM   1624  O   GLU    97      54.085  71.554  65.357  0.00  0.00
ATOM   1625  N   MET    98      54.888  73.342  64.295  0.00  0.00
ATOM   1626  H   MET    98      54.796  74.324  64.157  0.00  0.00
ATOM   1627  CA  MET    98      55.910  72.617  63.533  0.00  0.00
ATOM   1628  HA  MET    98      55.416  71.859  62.937  0.00  0.00
ATOM   1629  CB  MET    98      56.671  73.560  62.602  0.00  0.00
ATOM   1630  HB2 MET    98      56.981  74.423  63.153  0.00  0.00
ATOM   1631  HB3 MET    98      57.556  73.075  62.245  0.00  0.00
ATOM   1632  CG  MET    98      55.877  74.023  61.401  0.00  0.00
ATOM   1633  HG2 MET    98      54.971  74.463  61.737  0.00  0.00
ATOM   1634  HG3 MET    98      56.435  74.783  60.896  0.00  0.00
ATOM   1635  SD  MET    98      55.473  72.755  60.227  0.00  0.00
ATOM   1636  CE  MET    98      56.330  73.001  59.081  0.00  0.00
ATOM   1637  HE1 MET    98      56.460  73.164  58.760  0.00  0.00
ATOM   1638  HE2 MET    98      56.564  73.063  58.964  0.00  0.00
ATOM   1639  HE3 MET    98      56.483  72.913  58.824  0.00  0.00
ATOM   1640  C   MET    98      56.897  71.863  64.430  0.00  0.00
ATOM   1641  O   MET    98      57.231  70.727  64.141  0.00  0.00
ATOM   1642  N   ASN    99      57.311  72.447  65.549  0.00  0.00
ATOM   1643  H   ASN    99      57.007  73.372  65.738  0.00  0.00
ATOM   1644  CA  ASN    99      58.163  71.780  66.531  0.00  0.00
ATOM   1645  HA  ASN    99      59.028  71.391  66.025  0.00  0.00
ATOM   1646  CB  ASN    99      58.642  72.816  67.539  0.00  0.00
ATOM   1647  HB2 ASN    99      58.992  73.475  67.253  0.00  0.00
ATOM   1648  HB3 ASN    99      58.074  73.116  67.973  0.00  0.00
ATOM   1649  CG  ASN    99      59.432  72.579  68.356  0.00  0.00
ATOM   1650  OD1 ASN    99      59.646  72.130  68.694  0.00  0.00
ATOM   1651  ND2 ASN    99      59.888  72.876  68.718  0.00  0.00
ATOM   1652 1HD2 ASN    99      60.411  72.752  69.268  0.00  0.00
ATOM   1653 2HD2 ASN    99      59.709  73.239  68.451  0.00  0.00
ATOM   1654  C   ASN    99      57.495  70.575  67.202  0.00  0.00
ATOM   1655  O   ASN    99      58.144  69.557  67.388  0.00  0.00
ATOM   1656  N   TYR   100      56.197  70.652  67.496  0.00  0.00
ATOM   1657  H   TYR   100      55.720  71.504  67.325  0.00  0.00
ATOM   1658  CA  TYR   100      55.422  69.501  67.969  0.00  0.00
ATOM   1659  HA  TYR   100      55.949  69.067  68.809  0.00  0.00
ATOM   1660  CB  TYR   100      54.049  69.950  68.465  0.00  0.00
ATOM   1661  HB2 TYR   100      54.190  70.602  69.298  0.00  0.00
ATOM   1662  HB3 TYR   100      53.566  70.516  67.701  0.00  0.00
ATOM   1663  CG  TYR   100      53.145  68.822  68.870  0.00  0.00
ATOM   1664  CD1 TYR   100      53.206  68.290  70.140  0.00  0.00
ATOM   1665  HD1 TYR   100      53.899  68.681  70.832  0.00  0.00
ATOM   1666  CE1 TYR   100      52.357  67.257  70.517  0.00  0.00
ATOM   1667  HE1 TYR   100      52.394  66.854  71.491  0.00  0.00
ATOM   1668  CZ  TYR   100      51.456  66.745  69.614  0.00  0.00
ATOM   1669  OH  TYR   100      50.622  65.766  69.963  0.00  0.00
ATOM   1670  HH  TYR   100      50.725  65.500  70.847  0.00  0.00
ATOM   1671  CE2 TYR   100      51.397  67.280  68.342  0.00  0.00
ATOM   1672  HE2 TYR   100      50.697  66.883  67.668  0.00  0.00
ATOM   1673  CD2 TYR   100      52.238  68.309  67.962  0.00  0.00
ATOM   1674  HD2 TYR   100      52.184  68.719  66.991  0.00  0.00
ATOM   1675  C   TYR   100      55.285  68.408  66.907  0.00  0.00
ATOM   1676  O   TYR   100      55.436  67.238  67.225  0.00  0.00
ATOM   1677  N   ILE   101      55.076  68.763  65.638  0.00  0.00
ATOM   1678  H   ILE   101      54.954  69.734  65.440  0.00  0.00
ATOM   1679  CA  ILE   101      55.016  67.792  64.537  0.00  0.00
ATOM   1680  HA  ILE   101      54.260  67.063  64.791  0.00  0.00
ATOM   1681  CB  ILE   101      54.590  68.438  63.206  0.00  0.00
ATOM   1682  HB  ILE   101      55.274  69.230  62.968  0.00  0.00
ATOM   1683  CG2 ILE   101      54.626  67.418  62.079  0.00  0.00
ATOM   1684 1HG2 ILE   101      54.599  67.244  61.695  0.00  0.00
ATOM   1685 2HG2 ILE   101      54.760  67.156  61.842  0.00  0.00
ATOM   1686 3HG2 ILE   101      54.527  67.122  61.854  0.00  0.00
ATOM   1687  CG1 ILE   101      53.179  69.024  63.280  0.00  0.00
ATOM   1688 2HG1 ILE   101      52.466  68.238  63.323  0.00  0.00
ATOM   1689 3HG1 ILE   101      53.075  69.598  64.168  0.00  0.00
ATOM   1690  CD1 ILE   101      52.819  69.941  62.133  0.00  0.00
ATOM   1691 1HD1 ILE   101      52.633  70.170  61.881  0.00  0.00
ATOM   1692 2HD1 ILE   101      52.787  70.217  61.898  0.00  0.00
ATOM   1693 3HD1 ILE   101      52.749  70.110  61.785  0.00  0.00
ATOM   1694  C   ILE   101      56.344  67.035  64.412  0.00  0.00
ATOM   1695  O   ILE   101      56.351  65.823  64.276  0.00  0.00
ATOM   1696  N   THR   102      57.482  67.711  64.522  0.00  0.00
ATOM   1697  H   THR   102      57.445  68.705  64.594  0.00  0.00
ATOM   1698  CA  THR   102      58.804  67.073  64.581  0.00  0.00
ATOM   1699  HA  THR   102      58.948  66.487  63.683  0.00  0.00
ATOM   1700  CB  THR   102      59.918  68.123  64.627  0.00  0.00
ATOM   1701  HB  THR   102      59.834  68.698  65.505  0.00  0.00
ATOM   1702  CG2 THR   102      61.289  67.565  64.563  0.00  0.00
ATOM   1703 1HG2 THR   102      61.664  67.572  64.513  0.00  0.00
ATOM   1704 2HG2 THR   102      61.610  67.417  64.695  0.00  0.00
ATOM   1705 3HG2 THR   102      61.599  67.313  64.455  0.00  0.00
ATOM   1706  OG1 THR   102      59.813  68.950  63.543  0.00  0.00
ATOM   1707  HG1 THR   102      60.347  69.661  63.668  0.00  0.00
ATOM   1708  C   THR   102      58.943  66.103  65.756  0.00  0.00
ATOM   1709  O   THR   102      59.495  65.033  65.595  0.00  0.00
ATOM   1710  N   ALA   103      58.403  66.442  66.916  0.00  0.00
ATOM   1711  H   ALA   103      57.964  67.328  66.987  0.00  0.00
ATOM   1712  CA  ALA   103      58.451  65.612  68.108  0.00  0.00
ATOM   1713  HA  ALA   103      59.461  65.252  68.223  0.00  0.00
ATOM   1714  CB  ALA   103      58.117  66.472  69.309  0.00  0.00
ATOM   1715  HB1 ALA   103      58.033  66.816  69.506  0.00  0.00
ATOM   1716  HB2 ALA   103      57.889  66.568  69.632  0.00  0.00
ATOM   1717  HB3 ALA   103      58.182  66.628  69.682  0.00  0.00
ATOM   1718  C   ALA   103      57.560  64.371  68.044  0.00  0.00
ATOM   1719  O   ALA   103      57.936  63.359  68.539  0.00  0.00
ATOM   1720  N   ILE   104      56.392  64.416  67.444  0.00  0.00
ATOM   1721  H   ILE   104      56.107  65.286  67.094  0.00  0.00
ATOM   1722  CA  ILE   104      55.500  63.250  67.308  0.00  0.00
ATOM   1723  HA  ILE   104      55.610  62.661  68.209  0.00  0.00
ATOM   1724  CB  ILE   104      54.014  63.667  67.232  0.00  0.00
ATOM   1725  HB  ILE   104      53.838  64.371  68.022  0.00  0.00
ATOM   1726  CG2 ILE   104      53.658  64.354  65.930  0.00  0.00
ATOM   1727 1HG2 ILE   104      53.511  64.577  65.679  0.00  0.00
ATOM   1728 2HG2 ILE   104      53.672  64.568  65.599  0.00  0.00
ATOM   1729 3HG2 ILE   104      53.542  64.447  65.568  0.00  0.00
ATOM   1730  CG1 ILE   104      53.092  62.473  67.471  0.00  0.00
ATOM   1731 2HG1 ILE   104      52.814  62.150  66.869  0.00  0.00
ATOM   1732 3HG1 ILE   104      53.386  61.868  67.809  0.00  0.00
ATOM   1733  CD1 ILE   104      52.120  62.468  68.080  0.00  0.00
ATOM   1734 1HD1 ILE   104      51.838  62.515  68.296  0.00  0.00
ATOM   1735 2HD1 ILE   104      51.816  62.410  68.225  0.00  0.00
ATOM   1736 3HD1 ILE   104      51.983  62.441  68.153  0.00  0.00
ATOM   1737  C   ILE   104      55.926  62.318  66.164  0.00  0.00
ATOM   1738  O   ILE   104      55.760  61.118  66.276  0.00  0.00
ATOM   1739  N   ILE   105      56.564  62.821  65.110  0.00  0.00
ATOM   1740  H   ILE   105      56.645  63.811  65.046  0.00  0.00
ATOM   1741  CA  ILE   105      57.169  62.004  64.051  0.00  0.00
ATOM   1742  HA  ILE   105      56.418  61.309  63.701  0.00  0.00
ATOM   1743  CB  ILE   105      57.569  62.905  62.855  0.00  0.00
ATOM   1744  HB  ILE   105      57.997  63.788  63.235  0.00  0.00
ATOM   1745  CG2 ILE   105      58.587  62.297  61.951  0.00  0.00
ATOM   1746 1HG2 ILE   105      58.929  62.791  61.359  0.00  0.00
ATOM   1747 2HG2 ILE   105      59.257  62.009  62.318  0.00  0.00
ATOM   1748 3HG2 ILE   105      58.350  61.661  61.504  0.00  0.00
ATOM   1749  CG1 ILE   105      56.337  63.267  62.065  0.00  0.00
ATOM   1750 2HG1 ILE   105      55.948  62.402  61.631  0.00  0.00
ATOM   1751 3HG1 ILE   105      55.604  63.637  62.725  0.00  0.00
ATOM   1752  CD1 ILE   105      56.542  64.292  60.963  0.00  0.00
ATOM   1753 1HD1 ILE   105      56.657  64.613  60.796  0.00  0.00
ATOM   1754 2HD1 ILE   105      56.653  64.452  60.601  0.00  0.00
ATOM   1755 3HD1 ILE   105      56.434  64.548  60.681  0.00  0.00
ATOM   1756  C   ILE   105      58.304  61.114  64.579  0.00  0.00
ATOM   1757  O   ILE   105      58.566  60.062  64.036  0.00  0.00
ATOM   1758  N   GLU   106      58.914  61.451  65.700  0.00  0.00
ATOM   1759  H   GLU   106      58.690  62.323  66.111  0.00  0.00
ATOM   1760  CA  GLU   106      59.851  60.576  66.413  0.00  0.00
ATOM   1761  HA  GLU   106      60.622  60.290  65.722  0.00  0.00
ATOM   1762  CB  GLU   106      60.506  61.329  67.541  0.00  0.00
ATOM   1763  HB2 GLU   106      60.268  62.009  67.655  0.00  0.00
ATOM   1764  HB3 GLU   106      60.422  61.047  68.215  0.00  0.00
ATOM   1765  CG  GLU   106      61.597  61.552  67.651  0.00  0.00
ATOM   1766  HG2 GLU   106      61.702  61.014  67.534  0.00  0.00
ATOM   1767  HG3 GLU   106      61.725  61.804  67.188  0.00  0.00
ATOM   1768  CD  GLU   106      62.363  62.173  68.536  0.00  0.00
ATOM   1769  OE1 GLU   106      62.763  62.272  68.870  0.00  0.00
ATOM   1770  OE2 GLU   106      62.591  62.573  68.907  0.00  0.00
ATOM   1771  C   GLU   106      59.219  59.283  66.936  0.00  0.00
ATOM   1772  O   GLU   106      59.921  58.330  67.194  0.00  0.00
ATOM   1773  N   GLU   107      57.913  59.219  67.056  0.00  0.00
ATOM   1774  H   GLU   107      57.402  60.039  66.832  0.00  0.00
ATOM   1775  CA  GLU   107      57.157  58.081  67.579  0.00  0.00
ATOM   1776  HA  GLU   107      57.828  57.266  67.761  0.00  0.00
ATOM   1777  CB  GLU   107      56.506  58.476  68.892  0.00  0.00
ATOM   1778  HB2 GLU   107      56.250  59.064  68.976  0.00  0.00
ATOM   1779  HB3 GLU   107      55.989  58.156  69.089  0.00  0.00
ATOM   1780  CG  GLU   107      56.874  58.496  69.846  0.00  0.00
ATOM   1781  HG2 GLU   107      57.182  58.305  69.621  0.00  0.00
ATOM   1782  HG3 GLU   107      57.057  58.770  69.941  0.00  0.00
ATOM   1783  CD  GLU   107      56.587  58.417  70.988  0.00  0.00
ATOM   1784  OE1 GLU   107      56.380  58.400  71.409  0.00  0.00
ATOM   1785  OE2 GLU   107      56.567  58.365  71.502  0.00  0.00
ATOM   1786  C   GLU   107      56.107  57.541  66.611  0.00  0.00
ATOM   1787  O   GLU   107      55.691  56.416  66.743  0.00  0.00
ATOM   1788  N   GLN   108      55.721  58.310  65.613  0.00  0.00
ATOM   1789  H   GLN   108      56.084  59.223  65.593  0.00  0.00
ATOM   1790  CA  GLN   108      54.702  57.988  64.620  0.00  0.00
ATOM   1791  HA  GLN   108      54.504  56.936  64.649  0.00  0.00
ATOM   1792  CB  GLN   108      53.409  58.705  64.975  0.00  0.00
ATOM   1793  HB2 GLN   108      53.579  59.746  64.940  0.00  0.00
ATOM   1794  HB3 GLN   108      52.681  58.476  64.229  0.00  0.00
ATOM   1795  CG  GLN   108      52.818  58.373  66.317  0.00  0.00
ATOM   1796  HG2 GLN   108      53.456  58.393  66.983  0.00  0.00
ATOM   1797  HG3 GLN   108      52.191  59.018  66.546  0.00  0.00
ATOM   1798  CD  GLN   108      52.159  57.217  66.501  0.00  0.00
ATOM   1799  OE1 GLN   108      51.686  56.601  65.728  0.00  0.00
ATOM   1800  NE2 GLN   108      52.074  56.869  67.536  0.00  0.00
ATOM   1801 1HE2 GLN   108      51.640  56.111  67.656  0.00  0.00
ATOM   1802 2HE2 GLN   108      52.441  57.351  68.189  0.00  0.00
ATOM   1803  C   GLN   108      55.171  58.281  63.186  0.00  0.00
ATOM   1804  O   GLN   108      54.498  58.991  62.467  0.00  0.00
ATOM   1805  N   PRO   109      56.324  57.775  62.727  0.00  0.00
ATOM   1806  CD  PRO   109      57.163  56.804  63.380  0.00  0.00
ATOM   1807  HD2 PRO   109      56.606  55.975  63.739  0.00  0.00
ATOM   1808  HD3 PRO   109      57.680  57.251  64.198  0.00  0.00
ATOM   1809  CG  PRO   109      58.174  56.363  62.364  0.00  0.00
ATOM   1810  HG2 PRO   109      57.800  55.548  61.816  0.00  0.00
ATOM   1811  HG3 PRO   109      59.082  56.097  62.824  0.00  0.00
ATOM   1812  CB  PRO   109      58.317  57.545  61.458  0.00  0.00
ATOM   1813  HB2 PRO   109      58.624  57.230  60.493  0.00  0.00
ATOM   1814  HB3 PRO   109      59.028  58.212  61.866  0.00  0.00
ATOM   1815  CA  PRO   109      56.937  58.173  61.460  0.00  0.00
ATOM   1816  HA  PRO   109      57.050  59.240  61.455  0.00  0.00
ATOM   1817  C   PRO   109      56.179  57.810  60.180  0.00  0.00
ATOM   1818  O   PRO   109      56.504  58.341  59.127  0.00  0.00
ATOM   1819  N   LYS   110      55.195  56.918  60.237  0.00  0.00
ATOM   1820  H   LYS   110      54.996  56.523  61.130  0.00  0.00
ATOM   1821  CA  LYS   110      54.440  56.403  59.086  0.00  0.00
ATOM   1822  HA  LYS   110      54.734  56.931  58.198  0.00  0.00
ATOM   1823  CB  LYS   110      54.766  54.938  58.858  0.00  0.00
ATOM   1824  HB2 LYS   110      54.576  54.414  59.696  0.00  0.00
ATOM   1825  HB3 LYS   110      54.177  54.565  58.118  0.00  0.00
ATOM   1826  CG  LYS   110      56.137  54.669  58.468  0.00  0.00
ATOM   1827  HG2 LYS   110      56.343  55.221  57.694  0.00  0.00
ATOM   1828  HG3 LYS   110      56.719  54.942  59.204  0.00  0.00
ATOM   1829  CD  LYS   110      56.430  53.260  58.129  0.00  0.00
ATOM   1830  HD2 LYS   110      56.182  52.710  58.809  0.00  0.00
ATOM   1831  HD3 LYS   110      55.955  52.993  57.389  0.00  0.00
ATOM   1832  CE  LYS   110      57.734  52.989  57.867  0.00  0.00
ATOM   1833  HE2 LYS   110      57.987  53.569  57.229  0.00  0.00
ATOM   1834  HE3 LYS   110      58.199  53.216  58.597  0.00  0.00
ATOM   1835  NZ  LYS   110      58.036  51.679  57.502  0.00  0.00
ATOM   1836  HZ1 LYS   110      57.949  51.261  57.541  0.00  0.00
ATOM   1837  HZ2 LYS   110      58.058  51.398  57.186  0.00  0.00
ATOM   1838  HZ3 LYS   110      58.341  51.430  57.479  0.00  0.00
ATOM   1839  C   LYS   110      52.938  56.638  59.202  0.00  0.00
ATOM   1840  O   LYS   110      52.197  56.254  58.316  0.00  0.00
ATOM   1841  N   ASN   111      52.477  57.301  60.249  0.00  0.00
ATOM   1842  H   ASN   111      53.131  57.567  60.940  0.00  0.00
ATOM   1843  CA  ASN   111      51.140  57.873  60.336  0.00  0.00
ATOM   1844  HA  ASN   111      50.406  57.096  60.182  0.00  0.00
ATOM   1845  CB  ASN   111      50.968  58.443  61.747  0.00  0.00
ATOM   1846  HB2 ASN   111      51.015  57.644  62.468  0.00  0.00
ATOM   1847  HB3 ASN   111      51.768  59.134  61.958  0.00  0.00
ATOM   1848  CG  ASN   111      49.670  59.195  61.921  0.00  0.00
ATOM   1849  OD1 ASN   111      49.463  60.258  61.456  0.00  0.00
ATOM   1850  ND2 ASN   111      48.754  58.689  62.587  0.00  0.00
ATOM   1851 1HD2 ASN   111      47.928  59.217  62.649  0.00  0.00
ATOM   1852 2HD2 ASN   111      48.889  57.804  62.958  0.00  0.00
ATOM   1853  C   ASN   111      50.952  58.925  59.226  0.00  0.00
ATOM   1854  O   ASN   111      51.760  59.821  59.084  0.00  0.00
ATOM   1855  N   TYR   112      49.907  58.833  58.419  0.00  0.00
ATOM   1856  H   TYR   112      49.277  58.082  58.551  0.00  0.00
ATOM   1857  CA  TYR   112      49.680  59.759  57.310  0.00  0.00
ATOM   1858  HA  TYR   112      50.607  59.871  56.766  0.00  0.00
ATOM   1859  CB  TYR   112      48.635  59.170  56.351  0.00  0.00
ATOM   1860  HB2 TYR   112      48.593  58.119  56.503  0.00  0.00
ATOM   1861  HB3 TYR   112      47.668  59.545  56.595  0.00  0.00
ATOM   1862  CG  TYR   112      48.878  59.410  54.889  0.00  0.00
ATOM   1863  CD1 TYR   112      49.204  58.356  54.058  0.00  0.00
ATOM   1864  HD1 TYR   112      49.273  57.382  54.457  0.00  0.00
ATOM   1865  CE1 TYR   112      49.427  58.559  52.705  0.00  0.00
ATOM   1866  HE1 TYR   112      49.685  57.753  52.074  0.00  0.00
ATOM   1867  CZ  TYR   112      49.327  59.830  52.170  0.00  0.00
ATOM   1868  OH  TYR   112      49.545  60.043  50.864  0.00  0.00
ATOM   1869  HH  TYR   112      49.749  59.259  50.412  0.00  0.00
ATOM   1870  CE2 TYR   112      49.006  60.890  53.000  0.00  0.00
ATOM   1871  HE2 TYR   112      48.927  61.862  52.592  0.00  0.00
ATOM   1872  CD2 TYR   112      48.762  60.675  54.355  0.00  0.00
ATOM   1873  HD2 TYR   112      48.491  61.486  54.977  0.00  0.00
ATOM   1874  C   TYR   112      49.262  61.153  57.785  0.00  0.00
ATOM   1875  O   TYR   112      49.673  62.150  57.206  0.00  0.00
ATOM   1876  N   GLN   113      48.472  61.243  58.851  0.00  0.00
ATOM   1877  H   GLN   113      48.264  60.409  59.350  0.00  0.00
ATOM   1878  CA  GLN   113      47.851  62.489  59.312  0.00  0.00
ATOM   1879  HA  GLN   113      47.327  62.939  58.481  0.00  0.00
ATOM   1880  CB  GLN   113      46.822  62.217  60.419  0.00  0.00
ATOM   1881  HB2 GLN   113      47.273  61.693  61.244  0.00  0.00
ATOM   1882  HB3 GLN   113      46.513  63.182  60.792  0.00  0.00
ATOM   1883  CG  GLN   113      45.558  61.491  59.967  0.00  0.00
ATOM   1884  HG2 GLN   113      44.846  61.511  60.766  0.00  0.00
ATOM   1885  HG3 GLN   113      45.127  62.009  59.137  0.00  0.00
ATOM   1886  CD  GLN   113      45.770  60.043  59.606  0.00  0.00
ATOM   1887  OE1 GLN   113      46.217  59.260  60.351  0.00  0.00
ATOM   1888  NE2 GLN   113      45.475  59.628  58.449  0.00  0.00
ATOM   1889 1HE2 GLN   113      45.534  58.657  58.244  0.00  0.00
ATOM   1890 2HE2 GLN   113      45.162  60.252  57.789  0.00  0.00
ATOM   1891  C   GLN   113      48.868  63.530  59.789  0.00  0.00
ATOM   1892  O   GLN   113      48.687  64.703  59.499  0.00  0.00
ATOM   1893  N   VAL   114      49.941  63.126  60.476  0.00  0.00
ATOM   1894  H   VAL   114      49.998  62.163  60.726  0.00  0.00
ATOM   1895  CA  VAL   114      51.006  64.039  60.923  0.00  0.00
ATOM   1896  HA  VAL   114      50.530  64.879  61.413  0.00  0.00
ATOM   1897  CB  VAL   114      51.936  63.410  61.972  0.00  0.00
ATOM   1898  HB  VAL   114      52.655  64.158  62.261  0.00  0.00
ATOM   1899  CG1 VAL   114      51.166  63.052  63.226  0.00  0.00
ATOM   1900 1HG1 VAL   114      50.861  62.937  63.459  0.00  0.00
ATOM   1901 2HG1 VAL   114      51.068  62.851  63.569  0.00  0.00
ATOM   1902 3HG1 VAL   114      51.000  63.091  63.577  0.00  0.00
ATOM   1903  CG2 VAL   114      52.709  62.196  61.499  0.00  0.00
ATOM   1904 1HG2 VAL   114      53.107  61.961  61.605  0.00  0.00
ATOM   1905 2HG2 VAL   114      52.670  61.704  61.435  0.00  0.00
ATOM   1906 3HG2 VAL   114      52.936  62.024  61.117  0.00  0.00
ATOM   1907  C   VAL   114      51.810  64.630  59.765  0.00  0.00
ATOM   1908  O   VAL   114      52.162  65.798  59.791  0.00  0.00
ATOM   1909  N   TRP   115      52.055  63.857  58.705  0.00  0.00
ATOM   1910  H   TRP   115      51.740  62.916  58.734  0.00  0.00
ATOM   1911  CA  TRP   115      52.718  64.338  57.493  0.00  0.00
ATOM   1912  HA  TRP   115      53.577  64.936  57.777  0.00  0.00
ATOM   1913  CB  TRP   115      53.235  63.152  56.683  0.00  0.00
ATOM   1914  HB2 TRP   115      52.461  62.407  56.594  0.00  0.00
ATOM   1915  HB3 TRP   115      53.464  63.503  55.692  0.00  0.00
ATOM   1916  CG  TRP   115      54.474  62.525  57.242  0.00  0.00
ATOM   1917  CD1 TRP   115      54.548  61.358  57.902  0.00  0.00
ATOM   1918  HD1 TRP   115      53.705  60.732  58.103  0.00  0.00
ATOM   1919  NE1 TRP   115      55.850  61.080  58.221  0.00  0.00
ATOM   1920  HE1 TRP   115      56.135  60.233  58.663  0.00  0.00
ATOM   1921  CE2 TRP   115      56.689  62.075  57.806  0.00  0.00
ATOM   1922  CZ2 TRP   115      58.066  62.265  57.916  0.00  0.00
ATOM   1923  HZ2 TRP   115      58.664  61.519  58.393  0.00  0.00
ATOM   1924  CH2 TRP   115      58.640  63.428  57.395  0.00  0.00
ATOM   1925  HH2 TRP   115      59.694  63.584  57.458  0.00  0.00
ATOM   1926  CZ3 TRP   115      57.836  64.370  56.751  0.00  0.00
ATOM   1927  HZ3 TRP   115      58.281  65.249  56.342  0.00  0.00
ATOM   1928  CE3 TRP   115      56.453  64.166  56.634  0.00  0.00
ATOM   1929  HE3 TRP   115      55.846  64.883  56.124  0.00  0.00
ATOM   1930  CD2 TRP   115      55.845  63.014  57.164  0.00  0.00
ATOM   1931  C   TRP   115      51.810  65.243  56.658  0.00  0.00
ATOM   1932  O   TRP   115      52.272  66.251  56.156  0.00  0.00
ATOM   1933  N   HIE   116      50.515  64.957  56.567  0.00  0.00
ATOM   1934  H   HIE   116      50.200  64.098  56.954  0.00  0.00
ATOM   1935  CA  HIE   116      49.529  65.851  55.956  0.00  0.00
ATOM   1936  HA  HIE   116      49.875  66.108  54.964  0.00  0.00
ATOM   1937  CB  HIE   116      48.195  65.128  55.814  0.00  0.00
ATOM   1938  HB2 HIE   116      48.305  64.289  55.150  0.00  0.00
ATOM   1939  HB3 HIE   116      47.899  64.744  56.770  0.00  0.00
ATOM   1940  CG  HIE   116      47.104  66.000  55.300  0.00  0.00
ATOM   1941  ND1 HIE   116      46.045  66.454  56.031  0.00  0.00
ATOM   1942  CE1 HIE   116      45.359  67.256  55.230  0.00  0.00
ATOM   1943  HE1 HIE   116      44.484  67.783  55.492  0.00  0.00
ATOM   1944  NE2 HIE   116      45.926  67.318  54.058  0.00  0.00
ATOM   1945  HE2 HIE   116      45.583  67.854  53.304  0.00  0.00
ATOM   1946  CD2 HIE   116      47.035  66.535  54.082  0.00  0.00
ATOM   1947  HD2 HIE   116      47.725  66.389  53.308  0.00  0.00
ATOM   1948  C   HIE   116      49.369  67.167  56.727  0.00  0.00
ATOM   1949  O   HIE   116      49.387  68.223  56.112  0.00  0.00
ATOM   1950  N   HIE   117      49.327  67.124  58.060  0.00  0.00
ATOM   1951  H   HIE   117      49.284  66.227  58.496  0.00  0.00
ATOM   1952  CA  HIE   117      49.339  68.314  58.916  0.00  0.00
ATOM   1953  HA  HIE   117      48.463  68.909  58.681  0.00  0.00
ATOM   1954  CB  HIE   117      49.254  67.871  60.386  0.00  0.00
ATOM   1955  HB2 HIE   117      48.423  67.197  60.501  0.00  0.00
ATOM   1956  HB3 HIE   117      50.151  67.328  60.634  0.00  0.00
ATOM   1957  CG  HIE   117      49.074  68.947  61.421  0.00  0.00
ATOM   1958  ND1 HIE   117      48.357  70.102  61.298  0.00  0.00
ATOM   1959  CE1 HIE   117      48.481  70.752  62.457  0.00  0.00
ATOM   1960  HE1 HIE   117      48.066  71.693  62.683  0.00  0.00
ATOM   1961  NE2 HIE   117      49.189  70.060  63.300  0.00  0.00
ATOM   1962  HE2 HIE   117      49.435  70.344  64.221  0.00  0.00
ATOM   1963  CD2 HIE   117      49.572  68.911  62.662  0.00  0.00
ATOM   1964  HD2 HIE   117      50.142  68.125  63.063  0.00  0.00
ATOM   1965  C   HIE   117      50.557  69.191  58.630  0.00  0.00
ATOM   1966  O   HIE   117      50.406  70.386  58.452  0.00  0.00
ATOM   1967  N   ARG   118      51.745  68.597  58.481  0.00  0.00
ATOM   1968  H   ARG   118      51.783  67.616  58.645  0.00  0.00
ATOM   1969  CA  ARG   118      52.966  69.295  58.062  0.00  0.00
ATOM   1970  HA  ARG   118      53.101  70.129  58.740  0.00  0.00
ATOM   1971  CB  ARG   118      54.184  68.364  58.189  0.00  0.00
ATOM   1972  HB2 ARG   118      54.043  67.695  59.020  0.00  0.00
ATOM   1973  HB3 ARG   118      54.281  67.768  57.300  0.00  0.00
ATOM   1974  CG  ARG   118      55.458  69.161  58.412  0.00  0.00
ATOM   1975  HG2 ARG   118      55.649  69.759  57.579  0.00  0.00
ATOM   1976  HG3 ARG   118      55.318  69.790  59.228  0.00  0.00
ATOM   1977  CD  ARG   118      56.683  68.347  58.678  0.00  0.00
ATOM   1978  HD2 ARG   118      56.477  67.654  59.443  0.00  0.00
ATOM   1979  HD3 ARG   118      56.924  67.804  57.814  0.00  0.00
ATOM   1980  NE  ARG   118      57.815  69.199  59.041  0.00  0.00
ATOM   1981  HE  ARG   118      58.173  69.785  58.326  0.00  0.00
ATOM   1982  CZ  ARG   118      58.369  69.387  60.211  0.00  0.00
ATOM   1983  NH1 ARG   118      58.080  68.691  61.237  0.00  0.00
ATOM   1984 1HH1 ARG   118      57.482  67.932  61.137  0.00  0.00
ATOM   1985 2HH1 ARG   118      58.573  68.859  62.080  0.00  0.00
ATOM   1986  NH2 ARG   118      59.238  70.310  60.363  0.00  0.00
ATOM   1987 1HH2 ARG   118      59.428  70.889  59.583  0.00  0.00
ATOM   1988 2HH2 ARG   118      59.665  70.495  61.229  0.00  0.00
ATOM   1989  C   ARG   118      52.873  69.883  56.665  0.00  0.00
ATOM   1990  O   ARG   118      53.255  71.019  56.475  0.00  0.00
ATOM   1991  N   ARG   119      52.333  69.155  55.694  0.00  0.00
ATOM   1992  H   ARG   119      52.050  68.233  55.933  0.00  0.00
ATOM   1993  CA  ARG   119      52.149  69.599  54.301  0.00  0.00
ATOM   1994  HA  ARG   119      53.110  69.907  53.919  0.00  0.00
ATOM   1995  CB  ARG   119      51.634  68.434  53.457  0.00  0.00
ATOM   1996  HB2 ARG   119      52.265  67.600  53.597  0.00  0.00
ATOM   1997  HB3 ARG   119      50.677  68.156  53.786  0.00  0.00
ATOM   1998  CG  ARG   119      51.548  68.710  51.998  0.00  0.00
ATOM   1999  HG2 ARG   119      51.125  68.708  51.666  0.00  0.00
ATOM   2000  HG3 ARG   119      51.675  69.115  51.851  0.00  0.00
ATOM   2001  CD  ARG   119      51.844  68.412  51.136  0.00  0.00
ATOM   2002  HD2 ARG   119      52.235  68.441  51.384  0.00  0.00
ATOM   2003  HD3 ARG   119      51.737  68.036  51.313  0.00  0.00
ATOM   2004  NE  ARG   119      51.740  68.612  49.754  0.00  0.00
ATOM   2005  HE  ARG   119      51.192  69.323  49.435  0.00  0.00
ATOM   2006  CZ  ARG   119      52.258  67.947  48.865  0.00  0.00
ATOM   2007  NH1 ARG   119      52.991  66.992  49.117  0.00  0.00
ATOM   2008 1HH1 ARG   119      53.150  66.713  50.007  0.00  0.00
ATOM   2009 2HH1 ARG   119      53.352  66.525  48.410  0.00  0.00
ATOM   2010  NH2 ARG   119      52.035  68.236  47.686  0.00  0.00
ATOM   2011 1HH2 ARG   119      51.493  68.977  47.465  0.00  0.00
ATOM   2012 2HH2 ARG   119      52.427  67.734  47.020  0.00  0.00
ATOM   2013  C   ARG   119      51.257  70.831  54.189  0.00  0.00
ATOM   2014  O   ARG   119      51.621  71.756  53.510  0.00  0.00
ATOM   2015  N   VAL   120      50.141  70.892  54.877  0.00  0.00
ATOM   2016  H   VAL   120      49.882  70.094  55.405  0.00  0.00
ATOM   2017  CA  VAL   120      49.274  72.075  54.893  0.00  0.00
ATOM   2018  HA  VAL   120      49.182  72.416  53.877  0.00  0.00
ATOM   2019  CB  VAL   120      47.862  71.763  55.362  0.00  0.00
ATOM   2020  HB  VAL   120      47.553  72.249  55.593  0.00  0.00
ATOM   2021  CG1 VAL   120      47.183  71.468  54.781  0.00  0.00
ATOM   2022 1HG1 VAL   120      47.284  71.264  54.366  0.00  0.00
ATOM   2023 2HG1 VAL   120      46.642  71.183  54.982  0.00  0.00
ATOM   2024 3HG1 VAL   120      47.111  71.752  54.546  0.00  0.00
ATOM   2025  CG2 VAL   120      47.427  71.101  56.072  0.00  0.00
ATOM   2026 1HG2 VAL   120      47.361  70.762  56.196  0.00  0.00
ATOM   2027 2HG2 VAL   120      47.363  70.938  56.367  0.00  0.00
ATOM   2028 3HG2 VAL   120      47.241  71.124  56.181  0.00  0.00
ATOM   2029  C   VAL   120      49.886  73.240  55.661  0.00  0.00
ATOM   2030  O   VAL   120      49.753  74.352  55.236  0.00  0.00
ATOM   2031  N   LEU   121      50.595  73.001  56.757  0.00  0.00
ATOM   2032  H   LEU   121      50.663  72.067  57.067  0.00  0.00
ATOM   2033  CA  LEU   121      51.185  74.055  57.582  0.00  0.00
ATOM   2034  HA  LEU   121      50.457  74.852  57.659  0.00  0.00
ATOM   2035  CB  LEU   121      51.473  73.499  58.983  0.00  0.00
ATOM   2036  HB2 LEU   121      50.974  72.728  59.174  0.00  0.00
ATOM   2037  HB3 LEU   121      52.359  73.233  59.037  0.00  0.00
ATOM   2038  CG  LEU   121      51.268  74.308  60.058  0.00  0.00
ATOM   2039  HG  LEU   121      51.750  75.101  59.871  0.00  0.00
ATOM   2040  CD1 LEU   121      50.015  74.637  60.178  0.00  0.00
ATOM   2041 1HD1 LEU   121      49.772  75.066  60.126  0.00  0.00
ATOM   2042 2HD1 LEU   121      49.594  74.536  59.911  0.00  0.00
ATOM   2043 3HD1 LEU   121      49.764  74.577  60.578  0.00  0.00
ATOM   2044  CD2 LEU   121      51.663  73.723  61.367  0.00  0.00
ATOM   2045 1HD2 LEU   121      51.961  73.526  61.565  0.00  0.00
ATOM   2046 2HD2 LEU   121      51.755  73.791  61.796  0.00  0.00
ATOM   2047 3HD2 LEU   121      51.573  73.426  61.673  0.00  0.00
ATOM   2048  C   LEU   121      52.432  74.695  56.965  0.00  0.00
ATOM   2049  O   LEU   121      52.639  75.884  57.134  0.00  0.00
ATOM   2050  N   VAL   122      53.245  73.967  56.198  0.00  0.00
ATOM   2051  H   VAL   122      53.068  72.988  56.126  0.00  0.00
ATOM   2052  CA  VAL   122      54.359  74.557  55.434  0.00  0.00
ATOM   2053  HA  VAL   122      54.963  75.128  56.118  0.00  0.00
ATOM   2054  CB  VAL   122      55.278  73.480  54.843  0.00  0.00
ATOM   2055  HB  VAL   122      54.949  72.769  54.877  0.00  0.00
ATOM   2056  CG1 VAL   122      55.678  73.477  53.755  0.00  0.00
ATOM   2057 1HG1 VAL   122      55.624  73.644  53.725  0.00  0.00
ATOM   2058 2HG1 VAL   122      55.900  73.473  53.534  0.00  0.00
ATOM   2059 3HG1 VAL   122      55.805  73.311  53.196  0.00  0.00
ATOM   2060  CG2 VAL   122      56.308  73.299  55.354  0.00  0.00
ATOM   2061 1HG2 VAL   122      56.544  73.326  55.389  0.00  0.00
ATOM   2062 2HG2 VAL   122      56.594  73.305  55.615  0.00  0.00
ATOM   2063 3HG2 VAL   122      56.539  73.107  55.430  0.00  0.00
ATOM   2064  C   VAL   122      53.871  75.546  54.377  0.00  0.00
ATOM   2065  O   VAL   122      54.514  76.556  54.154  0.00  0.00
ATOM   2066  N   GLU   123      52.695  75.340  53.796  0.00  0.00
ATOM   2067  H   GLU   123      52.190  74.518  54.025  0.00  0.00
ATOM   2068  CA  GLU   123      52.042  76.304  52.912  0.00  0.00
ATOM   2069  HA  GLU   123      52.748  76.618  52.168  0.00  0.00
ATOM   2070  CB  GLU   123      50.877  75.639  52.200  0.00  0.00
ATOM   2071  HB2 GLU   123      50.861  74.888  52.223  0.00  0.00
ATOM   2072  HB3 GLU   123      50.188  75.812  52.469  0.00  0.00
ATOM   2073  CG  GLU   123      50.637  75.745  51.082  0.00  0.00
ATOM   2074  HG2 GLU   123      50.636  76.324  50.982  0.00  0.00
ATOM   2075  HG3 GLU   123      51.125  75.606  50.930  0.00  0.00
ATOM   2076  CD  GLU   123      49.730  75.252  50.305  0.00  0.00
ATOM   2077  OE1 GLU   123      49.536  74.911  49.701  0.00  0.00
ATOM   2078  OE2 GLU   123      49.195  75.201  50.289  0.00  0.00
ATOM   2079  C   GLU   123      51.592  77.575  53.642  0.00  0.00
ATOM   2080  O   GLU   123      51.588  78.616  53.060  0.00  0.00
ATOM   2081  N   TRP   124      51.264  77.519  54.911  0.00  0.00
ATOM   2082  H   TRP   124      51.262  76.632  55.329  0.00  0.00
ATOM   2083  CA  TRP   124      50.970  78.689  55.739  0.00  0.00
ATOM   2084  HA  TRP   124      50.398  79.397  55.163  0.00  0.00
ATOM   2085  CB  TRP   124      50.144  78.300  56.958  0.00  0.00
ATOM   2086  HB2 TRP   124      50.726  77.632  57.559  0.00  0.00
ATOM   2087  HB3 TRP   124      50.006  79.187  57.547  0.00  0.00
ATOM   2088  CG  TRP   124      48.800  77.694  56.773  0.00  0.00
ATOM   2089  CD1 TRP   124      48.206  77.381  55.637  0.00  0.00
ATOM   2090  HD1 TRP   124      48.637  77.525  54.693  0.00  0.00
ATOM   2091  NE1 TRP   124      46.979  76.842  55.883  0.00  0.00
ATOM   2092  HE1 TRP   124      46.360  76.550  55.187  0.00  0.00
ATOM   2093  CE2 TRP   124      46.712  76.780  57.186  0.00  0.00
ATOM   2094  CZ2 TRP   124      45.611  76.336  57.895  0.00  0.00
ATOM   2095  HZ2 TRP   124      44.778  75.927  57.406  0.00  0.00
ATOM   2096  CH2 TRP   124      45.606  76.462  59.247  0.00  0.00
ATOM   2097  HH2 TRP   124      44.759  76.155  59.800  0.00  0.00
ATOM   2098  CZ3 TRP   124      46.703  77.012  59.864  0.00  0.00
ATOM   2099  HZ3 TRP   124      46.701  77.132  60.895  0.00  0.00
ATOM   2100  CE3 TRP   124      47.811  77.429  59.142  0.00  0.00
ATOM   2101  HE3 TRP   124      48.646  77.847  59.625  0.00  0.00
ATOM   2102  CD2 TRP   124      47.848  77.331  57.779  0.00  0.00
ATOM   2103  C   TRP   124      52.235  79.420  56.200  0.00  0.00
ATOM   2104  O   TRP   124      52.225  80.625  56.353  0.00  0.00
ATOM   2105  N   LEU   125      53.330  78.699  56.408  0.00  0.00
ATOM   2106  H   LEU   125      53.236  77.715  56.330  0.00  0.00
ATOM   2107  CA  LEU   125      54.627  79.208  56.849  0.00  0.00
ATOM   2108  HA  LEU   125      54.458  79.888  57.662  0.00  0.00
ATOM   2109  CB  LEU   125      55.442  78.025  57.357  0.00  0.00
ATOM   2110  HB2 LEU   125      54.842  77.485  58.053  0.00  0.00
ATOM   2111  HB3 LEU   125      55.618  77.378  56.532  0.00  0.00
ATOM   2112  CG  LEU   125      56.789  78.328  58.007  0.00  0.00
ATOM   2113  HG  LEU   125      57.399  78.876  57.353  0.00  0.00
ATOM   2114  CD1 LEU   125      56.650  79.097  59.253  0.00  0.00
ATOM   2115 1HD1 LEU   125      56.604  79.138  59.633  0.00  0.00
ATOM   2116 2HD1 LEU   125      56.774  79.349  59.526  0.00  0.00
ATOM   2117 3HD1 LEU   125      56.476  79.388  59.519  0.00  0.00
ATOM   2118  CD2 LEU   125      57.490  77.071  58.331  0.00  0.00
ATOM   2119 1HD2 LEU   125      57.693  76.818  58.565  0.00  0.00
ATOM   2120 2HD2 LEU   125      57.539  76.665  58.372  0.00  0.00
ATOM   2121 3HD2 LEU   125      57.776  76.819  58.291  0.00  0.00
ATOM   2122  C   LEU   125      55.383  79.986  55.772  0.00  0.00
ATOM   2123  O   LEU   125      56.136  80.882  56.089  0.00  0.00
ATOM   2124  N   LYS   126      55.167  79.663  54.501  0.00  0.00
ATOM   2125  H   LYS   126      54.558  78.899  54.350  0.00  0.00
ATOM   2126  CA  LYS   126      55.762  80.310  53.319  0.00  0.00
ATOM   2127  HA  LYS   126      55.527  79.701  52.484  0.00  0.00
ATOM   2128  CB  LYS   126      55.097  81.645  53.064  0.00  0.00
ATOM   2129  HB2 LYS   126      55.275  82.283  53.874  0.00  0.00
ATOM   2130  HB3 LYS   126      55.531  82.104  52.209  0.00  0.00
ATOM   2131  CG  LYS   126      53.626  81.544  52.847  0.00  0.00
ATOM   2132  HG2 LYS   126      53.395  80.921  52.384  0.00  0.00
ATOM   2133  HG3 LYS   126      53.202  81.419  53.529  0.00  0.00
ATOM   2134  CD  LYS   126      53.041  82.462  52.354  0.00  0.00
ATOM   2135  HD2 LYS   126      53.134  82.969  52.507  0.00  0.00
ATOM   2136  HD3 LYS   126      53.241  82.537  51.974  0.00  0.00
ATOM   2137  CE  LYS   126      52.064  82.593  52.156  0.00  0.00
ATOM   2138  HE2 LYS   126      51.941  82.496  52.380  0.00  0.00
ATOM   2139  HE3 LYS   126      51.919  82.719  52.003  0.00  0.00
ATOM   2140  NZ  LYS   126      51.482  82.710  51.876  0.00  0.00
ATOM   2141  HZ1 LYS   126      51.385  82.711  51.805  0.00  0.00
ATOM   2142  HZ2 LYS   126      51.259  82.739  51.842  0.00  0.00
ATOM   2143  HZ3 LYS   126      51.360  82.775  51.766  0.00  0.00
ATOM   2144  C   LYS   126      57.279  80.393  53.294  0.00  0.00
ATOM   2145  O   LYS   126      57.817  81.188  52.603  0.00  0.00
ATOM   2146  N   ASP   127      57.969  79.551  54.030  0.00  0.00
ATOM   2147  H   ASP   127      57.460  78.916  54.544  0.00  0.00
ATOM   2148  CA  ASP   127      59.415  79.529  54.177  0.00  0.00
ATOM   2149  HA  ASP   127      59.853  79.980  53.302  0.00  0.00
ATOM   2150  CB  ASP   127      59.809  80.409  55.361  0.00  0.00
ATOM   2151  HB2 ASP   127      59.366  81.370  55.230  0.00  0.00
ATOM   2152  HB3 ASP   127      59.427  79.990  56.263  0.00  0.00
ATOM   2153  CG  ASP   127      61.294  80.610  55.513  0.00  0.00
ATOM   2154  OD1 ASP   127      61.715  81.116  56.531  0.00  0.00
ATOM   2155  OD2 ASP   127      62.043  80.306  54.628  0.00  0.00
ATOM   2156  C   ASP   127      59.982  78.106  54.301  0.00  0.00
ATOM   2157  O   ASP   127      60.327  77.653  55.385  0.00  0.00
ATOM   2158  N   PRO   128      60.083  77.359  53.195  0.00  0.00
ATOM   2159  CD  PRO   128      59.656  77.736  51.871  0.00  0.00
ATOM   2160  HD2 PRO   128      60.214  78.518  51.487  0.00  0.00
ATOM   2161  HD3 PRO   128      58.653  77.990  51.849  0.00  0.00
ATOM   2162  CG  PRO   128      59.867  76.571  51.019  0.00  0.00
ATOM   2163  HG2 PRO   128      60.413  76.792  50.341  0.00  0.00
ATOM   2164  HG3 PRO   128      59.078  76.275  50.688  0.00  0.00
ATOM   2165  CB  PRO   128      60.463  75.531  51.743  0.00  0.00
ATOM   2166  HB2 PRO   128      61.329  75.341  51.357  0.00  0.00
ATOM   2167  HB3 PRO   128      59.902  74.746  51.662  0.00  0.00
ATOM   2168  CA  PRO   128      60.598  75.996  53.180  0.00  0.00
ATOM   2169  HA  PRO   128      59.959  75.395  53.797  0.00  0.00
ATOM   2170  C   PRO   128      62.031  75.824  53.676  0.00  0.00
ATOM   2171  O   PRO   128      62.417  74.716  53.980  0.00  0.00
ATOM   2172  N   SER   129      62.824  76.873  53.820  0.00  0.00
ATOM   2173  H   SER   129      62.483  77.762  53.568  0.00  0.00
ATOM   2174  CA  SER   129      64.161  76.786  54.406  0.00  0.00
ATOM   2175  HA  SER   129      64.710  76.065  53.836  0.00  0.00
ATOM   2176  CB  SER   129      64.897  78.099  54.291  0.00  0.00
ATOM   2177  HB2 SER   129      65.924  77.927  54.531  0.00  0.00
ATOM   2178  HB3 SER   129      64.841  78.459  53.291  0.00  0.00
ATOM   2179  OG  SER   129      64.399  79.055  55.162  0.00  0.00
ATOM   2180  HG  SER   129      63.649  79.414  54.849  0.00  0.00
ATOM   2181  C   SER   129      64.186  76.305  55.849  0.00  0.00
ATOM   2182  O   SER   129      65.171  75.749  56.292  0.00  0.00
ATOM   2183  N   GLN   130      63.097  76.489  56.585  0.00  0.00
ATOM   2184  H   GLN   130      62.327  76.959  56.175  0.00  0.00
ATOM   2185  CA  GLN   130      62.946  75.996  57.950  0.00  0.00
ATOM   2186  HA  GLN   130      63.811  76.289  58.522  0.00  0.00
ATOM   2187  CB  GLN   130      61.713  76.626  58.590  0.00  0.00
ATOM   2188  HB2 GLN   130      60.839  76.336  58.046  0.00  0.00
ATOM   2189  HB3 GLN   130      61.631  76.255  59.595  0.00  0.00
ATOM   2190  CG  GLN   130      61.775  78.138  58.657  0.00  0.00
ATOM   2191  HG2 GLN   130      62.243  78.449  58.392  0.00  0.00
ATOM   2192  HG3 GLN   130      61.322  78.499  58.396  0.00  0.00
ATOM   2193  CD  GLN   130      61.797  78.793  59.427  0.00  0.00
ATOM   2194  OE1 GLN   130      61.810  78.369  60.354  0.00  0.00
ATOM   2195  NE2 GLN   130      61.806  79.837  59.081  0.00  0.00
ATOM   2196 1HE2 GLN   130      61.798  80.243  59.574  0.00  0.00
ATOM   2197 2HE2 GLN   130      61.798  80.205  58.325  0.00  0.00
ATOM   2198  C   GLN   130      62.865  74.469  58.042  0.00  0.00
ATOM   2199  O   GLN   130      63.174  73.910  59.056  0.00  0.00
ATOM   2200  N   GLU   131      62.474  73.774  56.986  0.00  0.00
ATOM   2201  H   GLU   131      62.242  74.268  56.163  0.00  0.00
ATOM   2202  CA  GLU   131      62.419  72.311  56.947  0.00  0.00
ATOM   2203  HA  GLU   131      61.980  71.963  57.873  0.00  0.00
ATOM   2204  CB  GLU   131      61.545  71.850  55.772  0.00  0.00
ATOM   2205  HB2 GLU   131      61.944  72.247  54.858  0.00  0.00
ATOM   2206  HB3 GLU   131      61.587  70.779  55.688  0.00  0.00
ATOM   2207  CG  GLU   131      60.081  72.248  55.874  0.00  0.00
ATOM   2208  HG2 GLU   131      59.994  73.305  56.043  0.00  0.00
ATOM   2209  HG3 GLU   131      59.598  72.045  54.936  0.00  0.00
ATOM   2210  CD  GLU   131      59.370  71.488  56.972  0.00  0.00
ATOM   2211  OE1 GLU   131      59.517  71.840  58.129  0.00  0.00
ATOM   2212  OE2 GLU   131      58.678  70.515  56.693  0.00  0.00
ATOM   2213  C   GLU   131      63.800  71.648  56.865  0.00  0.00
ATOM   2214  O   GLU   131      63.943  70.501  57.260  0.00  0.00
ATOM   2215  N   LEU   132      64.836  72.367  56.428  0.00  0.00
ATOM   2216  H   LEU   132      64.670  73.314  56.167  0.00  0.00
ATOM   2217  CA  LEU   132      66.202  71.862  56.316  0.00  0.00
ATOM   2218  HA  LEU   132      66.161  70.977  55.710  0.00  0.00
ATOM   2219  CB  LEU   132      67.086  72.894  55.611  0.00  0.00
ATOM   2220  HB2 LEU   132      67.062  73.792  56.165  0.00  0.00
ATOM   2221  HB3 LEU   132      68.089  72.544  55.602  0.00  0.00
ATOM   2222  CG  LEU   132      66.711  73.220  54.190  0.00  0.00
ATOM   2223  HG  LEU   132      65.961  73.678  54.141  0.00  0.00
ATOM   2224  CD1 LEU   132      67.565  73.936  53.650  0.00  0.00
ATOM   2225 1HD1 LEU   132      67.772  74.135  53.352  0.00  0.00
ATOM   2226 2HD1 LEU   132      67.849  74.172  53.584  0.00  0.00
ATOM   2227 3HD1 LEU   132      67.696  74.044  53.627  0.00  0.00
ATOM   2228  CD2 LEU   132      66.522  72.259  53.310  0.00  0.00
ATOM   2229 1HD2 LEU   132      66.522  72.004  53.270  0.00  0.00
ATOM   2230 2HD2 LEU   132      66.318  72.033  52.946  0.00  0.00
ATOM   2231 3HD2 LEU   132      66.580  72.057  53.051  0.00  0.00
ATOM   2232  C   LEU   132      66.824  71.414  57.636  0.00  0.00
ATOM   2233  O   LEU   132      67.736  70.641  57.628  0.00  0.00
ATOM   2234  N   GLU   133      66.311  71.837  58.758  0.00  0.00
ATOM   2235  H   GLU   133      65.581  72.482  58.679  0.00  0.00
ATOM   2236  CA  GLU   133      66.690  71.388  60.101  0.00  0.00
ATOM   2237  HA  GLU   133      67.752  71.290  60.140  0.00  0.00
ATOM   2238  CB  GLU   133      66.282  72.436  61.107  0.00  0.00
ATOM   2239  HB2 GLU   133      65.504  72.733  60.984  0.00  0.00
ATOM   2240  HB3 GLU   133      66.271  72.160  61.916  0.00  0.00
ATOM   2241  CG  GLU   133      66.945  73.465  61.212  0.00  0.00
ATOM   2242  HG2 GLU   133      67.253  73.540  61.004  0.00  0.00
ATOM   2243  HG3 GLU   133      66.746  73.750  61.100  0.00  0.00
ATOM   2244  CD  GLU   133      67.454  74.031  61.775  0.00  0.00
ATOM   2245  OE1 GLU   133      67.725  74.305  61.932  0.00  0.00
ATOM   2246  OE2 GLU   133      67.599  74.221  62.076  0.00  0.00
ATOM   2247  C   GLU   133      66.110  70.025  60.497  0.00  0.00
ATOM   2248  O   GLU   133      66.445  69.519  61.530  0.00  0.00
ATOM   2249  N   PHE   134      65.255  69.425  59.699  0.00  0.00
ATOM   2250  H   PHE   134      65.012  69.895  58.873  0.00  0.00
ATOM   2251  CA  PHE   134      64.586  68.155  59.961  0.00  0.00
ATOM   2252  HA  PHE   134      65.089  67.647  60.751  0.00  0.00
ATOM   2253  CB  PHE   134      63.191  68.476  60.432  0.00  0.00
ATOM   2254  HB2 PHE   134      63.200  68.578  61.391  0.00  0.00
ATOM   2255  HB3 PHE   134      62.933  69.331  60.074  0.00  0.00
ATOM   2256  CG  PHE   134      62.098  67.584  60.142  0.00  0.00
ATOM   2257  CD1 PHE   134      61.900  66.514  60.888  0.00  0.00
ATOM   2258  HD1 PHE   134      62.526  66.327  61.655  0.00  0.00
ATOM   2259  CE1 PHE   134      60.894  65.690  60.619  0.00  0.00
ATOM   2260  HE1 PHE   134      60.750  64.872  61.193  0.00  0.00
ATOM   2261  CZ  PHE   134      60.106  65.923  59.593  0.00  0.00
ATOM   2262  HZ  PHE   134      59.348  65.286  59.381  0.00  0.00
ATOM   2263  CE2 PHE   134      60.325  66.970  58.826  0.00  0.00
ATOM   2264  HE2 PHE   134      59.731  67.133  58.030  0.00  0.00
ATOM   2265  CD2 PHE   134      61.311  67.803  59.105  0.00  0.00
ATOM   2266  HD2 PHE   134      61.454  68.623  58.536  0.00  0.00
ATOM   2267  C   PHE   134      64.568  67.173  58.778  0.00  0.00
ATOM   2268  O   PHE   134      64.701  65.975  58.977  0.00  0.00
ATOM   2269  N   ILE   135      64.412  67.648  57.552  0.00  0.00
ATOM   2270  H   ILE   135      64.320  68.636  57.460  0.00  0.00
ATOM   2271  CA  ILE   135      64.095  66.837  56.367  0.00  0.00
ATOM   2272  HA  ILE   135      63.362  66.131  56.711  0.00  0.00
ATOM   2273  CB  ILE   135      63.419  67.733  55.317  0.00  0.00
ATOM   2274  HB  ILE   135      62.763  68.399  55.859  0.00  0.00
ATOM   2275  CG2 ILE   135      64.405  68.613  54.558  0.00  0.00
ATOM   2276 1HG2 ILE   135      64.700  68.759  54.340  0.00  0.00
ATOM   2277 2HG2 ILE   135      64.577  68.862  54.329  0.00  0.00
ATOM   2278 3HG2 ILE   135      64.659  68.857  54.454  0.00  0.00
ATOM   2279  CG1 ILE   135      62.534  66.996  54.314  0.00  0.00
ATOM   2280 2HG1 ILE   135      62.083  67.656  53.710  0.00  0.00
ATOM   2281 3HG1 ILE   135      63.082  66.400  53.722  0.00  0.00
ATOM   2282  CD1 ILE   135      61.493  66.199  54.863  0.00  0.00
ATOM   2283 1HD1 ILE   135      61.341  66.085  55.219  0.00  0.00
ATOM   2284 2HD1 ILE   135      61.049  66.127  54.855  0.00  0.00
ATOM   2285 3HD1 ILE   135      61.325  65.797  54.884  0.00  0.00
ATOM   2286  C   ILE   135      65.254  65.983  55.813  0.00  0.00
ATOM   2287  O   ILE   135      65.092  65.318  54.812  0.00  0.00
ATOM   2288  N   ALA   136      66.405  65.967  56.465  0.00  0.00
ATOM   2289  H   ALA   136      66.490  66.598  57.225  0.00  0.00
ATOM   2290  CA  ALA   136      67.481  64.996  56.277  0.00  0.00
ATOM   2291  HA  ALA   136      67.184  64.283  55.525  0.00  0.00
ATOM   2292  CB  ALA   136      68.718  65.715  55.773  0.00  0.00
ATOM   2293  HB1 ALA   136      68.968  66.039  55.736  0.00  0.00
ATOM   2294  HB2 ALA   136      69.123  65.765  55.742  0.00  0.00
ATOM   2295  HB3 ALA   136      68.982  65.849  55.465  0.00  0.00
ATOM   2296  C   ALA   136      67.772  64.194  57.547  0.00  0.00
ATOM   2297  O   ALA   136      68.144  63.038  57.465  0.00  0.00
ATOM   2298  N   ASP   137      67.542  64.762  58.720  0.00  0.00
ATOM   2299  H   ASP   137      67.264  65.715  58.721  0.00  0.00
ATOM   2300  CA  ASP   137      67.655  64.074  59.997  0.00  0.00
ATOM   2301  HA  ASP   137      68.645  63.649  60.063  0.00  0.00
ATOM   2302  CB  ASP   137      67.483  65.079  61.128  0.00  0.00
ATOM   2303  HB2 ASP   137      67.794  65.876  60.982  0.00  0.00
ATOM   2304  HB3 ASP   137      66.677  65.240  61.346  0.00  0.00
ATOM   2305  CG  ASP   137      68.012  64.808  62.184  0.00  0.00
ATOM   2306  OD1 ASP   137      68.053  64.806  62.544  0.00  0.00
ATOM   2307  OD2 ASP   137      68.403  64.605  62.654  0.00  0.00
ATOM   2308  C   ASP   137      66.652  62.921  60.138  0.00  0.00
ATOM   2309  O   ASP   137      67.007  61.865  60.613  0.00  0.00
ATOM   2310  N   ILE   138      65.430  63.075  59.645  0.00  0.00
ATOM   2311  H   ILE   138      65.174  63.985  59.328  0.00  0.00
ATOM   2312  CA  ILE   138      64.442  61.993  59.549  0.00  0.00
ATOM   2313  HA  ILE   138      64.372  61.567  60.541  0.00  0.00
ATOM   2314  CB  ILE   138      63.061  62.582  59.194  0.00  0.00
ATOM   2315  HB  ILE   138      62.882  63.390  59.877  0.00  0.00
ATOM   2316  CG2 ILE   138      63.000  63.173  57.788  0.00  0.00
ATOM   2317 1HG2 ILE   138      62.827  63.437  57.507  0.00  0.00
ATOM   2318 2HG2 ILE   138      63.155  63.379  57.459  0.00  0.00
ATOM   2319 3HG2 ILE   138      62.947  63.153  57.372  0.00  0.00
ATOM   2320  CG1 ILE   138      61.903  61.605  59.356  0.00  0.00
ATOM   2321 2HG1 ILE   138      61.038  62.093  59.155  0.00  0.00
ATOM   2322 3HG1 ILE   138      61.984  60.855  58.687  0.00  0.00
ATOM   2323  CD1 ILE   138      61.727  60.989  60.661  0.00  0.00
ATOM   2324 1HD1 ILE   138      61.777  60.785  60.960  0.00  0.00
ATOM   2325 2HD1 ILE   138      61.709  60.938  61.009  0.00  0.00
ATOM   2326 3HD1 ILE   138      61.559  60.770  60.963  0.00  0.00
ATOM   2327  C   ILE   138      64.868  60.861  58.618  0.00  0.00
ATOM   2328  O   ILE   138      64.570  59.715  58.855  0.00  0.00
ATOM   2329  N   LEU   139      65.631  61.154  57.581  0.00  0.00
ATOM   2330  H   LEU   139      65.892  62.099  57.473  0.00  0.00
ATOM   2331  CA  LEU   139      66.186  60.184  56.635  0.00  0.00
ATOM   2332  HA  LEU   139      65.486  59.366  56.512  0.00  0.00
ATOM   2333  CB  LEU   139      66.388  60.853  55.268  0.00  0.00
ATOM   2334  HB2 LEU   139      67.061  61.682  55.394  0.00  0.00
ATOM   2335  HB3 LEU   139      66.879  60.151  54.614  0.00  0.00
ATOM   2336  CG  LEU   139      65.109  61.342  54.586  0.00  0.00
ATOM   2337  HG  LEU   139      64.616  62.043  55.225  0.00  0.00
ATOM   2338  CD1 LEU   139      65.421  62.055  53.286  0.00  0.00
ATOM   2339 1HD1 LEU   139      65.621  62.569  53.200  0.00  0.00
ATOM   2340 2HD1 LEU   139      65.774  61.909  52.893  0.00  0.00
ATOM   2341 3HD1 LEU   139      65.096  62.189  52.854  0.00  0.00
ATOM   2342  CD2 LEU   139      64.161  60.216  54.270  0.00  0.00
ATOM   2343 1HD2 LEU   139      64.475  59.628  53.700  0.00  0.00
ATOM   2344 2HD2 LEU   139      63.896  59.754  54.962  0.00  0.00
ATOM   2345 3HD2 LEU   139      63.409  60.477  53.892  0.00  0.00
ATOM   2346  C   LEU   139      67.462  59.525  57.153  0.00  0.00
ATOM   2347  O   LEU   139      67.834  58.477  56.701  0.00  0.00
ATOM   2348  N   ASN   140      68.098  60.067  58.179  0.00  0.00
ATOM   2349  H   ASN   140      67.800  60.951  58.482  0.00  0.00
ATOM   2350  CA  ASN   140      69.108  59.379  58.967  0.00  0.00
ATOM   2351  HA  ASN   140      69.751  58.836  58.293  0.00  0.00
ATOM   2352  CB  ASN   140      69.946  60.413  59.705  0.00  0.00
ATOM   2353  HB2 ASN   140      70.305  61.134  59.026  0.00  0.00
ATOM   2354  HB3 ASN   140      69.362  60.914  60.426  0.00  0.00
ATOM   2355  CG  ASN   140      71.114  59.826  60.394  0.00  0.00
ATOM   2356  OD1 ASN   140      71.854  59.137  59.929  0.00  0.00
ATOM   2357  ND2 ASN   140      71.337  60.066  61.521  0.00  0.00
ATOM   2358 1HD2 ASN   140      72.115  59.687  61.955  0.00  0.00
ATOM   2359 2HD2 ASN   140      70.747  60.622  61.929  0.00  0.00
ATOM   2360  C   ASN   140      68.498  58.327  59.908  0.00  0.00
ATOM   2361  O   ASN   140      69.149  57.400  60.280  0.00  0.00
ATOM   2362  N   GLN   141      67.242  58.430  60.268  0.00  0.00
ATOM   2363  H   GLN   141      66.764  59.223  59.969  0.00  0.00
ATOM   2364  CA  GLN   141      66.513  57.429  61.045  0.00  0.00
ATOM   2365  HA  GLN   141      67.190  56.966  61.748  0.00  0.00
ATOM   2366  CB  GLN   141      65.386  58.077  61.834  0.00  0.00
ATOM   2367  HB2 GLN   141      64.732  58.564  61.197  0.00  0.00
ATOM   2368  HB3 GLN   141      64.844  57.342  62.327  0.00  0.00
ATOM   2369  CG  GLN   141      65.818  59.052  62.849  0.00  0.00
ATOM   2370  HG2 GLN   141      66.183  59.219  62.951  0.00  0.00
ATOM   2371  HG3 GLN   141      65.734  59.482  62.924  0.00  0.00
ATOM   2372  CD  GLN   141      65.829  59.269  63.619  0.00  0.00
ATOM   2373  OE1 GLN   141      65.656  58.679  63.935  0.00  0.00
ATOM   2374  NE2 GLN   141      66.035  60.120  63.952  0.00  0.00
ATOM   2375 1HE2 GLN   141      66.037  60.274  64.466  0.00  0.00
ATOM   2376 2HE2 GLN   141      66.184  60.622  63.711  0.00  0.00
ATOM   2377  C   GLN   141      65.963  56.310  60.162  0.00  0.00
ATOM   2378  O   GLN   141      66.055  55.172  60.535  0.00  0.00
ATOM   2379  N   ASP   142      65.453  56.617  58.977  0.00  0.00
ATOM   2380  H   ASP   142      65.369  57.574  58.770  0.00  0.00
ATOM   2381  CA  ASP   142      65.046  55.660  57.954  0.00  0.00
ATOM   2382  HA  ASP   142      65.740  54.840  57.975  0.00  0.00
ATOM   2383  CB  ASP   142      63.660  55.098  58.265  0.00  0.00
ATOM   2384  HB2 ASP   142      63.698  54.616  59.219  0.00  0.00
ATOM   2385  HB3 ASP   142      62.956  55.896  58.339  0.00  0.00
ATOM   2386  CG  ASP   142      63.166  54.095  57.241  0.00  0.00
ATOM   2387  OD1 ASP   142      62.947  53.672  56.863  0.00  0.00
ATOM   2388  OD2 ASP   142      62.986  53.694  56.838  0.00  0.00
ATOM   2389  C   ASP   142      65.082  56.277  56.552  0.00  0.00
ATOM   2390  O   ASP   142      64.209  57.031  56.167  0.00  0.00
ATOM   2391  N   ALA   143      66.106  55.957  55.775  0.00  0.00
ATOM   2392  H   ALA   143      66.789  55.356  56.153  0.00  0.00
ATOM   2393  CA  ALA   143      66.343  56.485  54.440  0.00  0.00
ATOM   2394  HA  ALA   143      66.249  57.558  54.493  0.00  0.00
ATOM   2395  CB  ALA   143      67.779  56.160  54.050  0.00  0.00
ATOM   2396  HB1 ALA   143      68.047  55.715  53.862  0.00  0.00
ATOM   2397  HB2 ALA   143      68.095  56.370  53.667  0.00  0.00
ATOM   2398  HB3 ALA   143      68.246  56.196  54.317  0.00  0.00
ATOM   2399  C   ALA   143      65.344  56.028  53.361  0.00  0.00
ATOM   2400  O   ALA   143      65.511  56.392  52.205  0.00  0.00
ATOM   2401  N   LYS   144      64.319  55.241  53.689  0.00  0.00
ATOM   2402  H   LYS   144      64.265  54.943  54.637  0.00  0.00
ATOM   2403  CA  LYS   144      63.301  54.724  52.753  0.00  0.00
ATOM   2404  HA  LYS   144      63.457  55.150  51.772  0.00  0.00
ATOM   2405  CB  LYS   144      63.416  53.201  52.617  0.00  0.00
ATOM   2406  HB2 LYS   144      63.247  52.747  53.575  0.00  0.00
ATOM   2407  HB3 LYS   144      62.620  52.878  51.970  0.00  0.00
ATOM   2408  CG  LYS   144      64.714  52.683  52.014  0.00  0.00
ATOM   2409  HG2 LYS   144      64.524  51.911  51.414  0.00  0.00
ATOM   2410  HG3 LYS   144      65.118  53.395  51.453  0.00  0.00
ATOM   2411  CD  LYS   144      65.717  52.216  52.945  0.00  0.00
ATOM   2412  HD2 LYS   144      65.960  52.981  53.536  0.00  0.00
ATOM   2413  HD3 LYS   144      65.298  51.510  53.506  0.00  0.00
ATOM   2414  CE  LYS   144      66.945  51.651  52.286  0.00  0.00
ATOM   2415  HE2 LYS   144      66.658  50.884  51.643  0.00  0.00
ATOM   2416  HE3 LYS   144      67.402  52.407  51.732  0.00  0.00
ATOM   2417  NZ  LYS   144      67.890  51.112  53.224  0.00  0.00
ATOM   2418  HZ1 LYS   144      68.691  50.757  52.769  0.00  0.00
ATOM   2419  HZ2 LYS   144      68.176  51.799  53.842  0.00  0.00
ATOM   2420  HZ3 LYS   144      67.476  50.396  53.730  0.00  0.00
ATOM   2421  C   LYS   144      61.869  55.113  53.134  0.00  0.00
ATOM   2422  O   LYS   144      60.938  54.687  52.470  0.00  0.00
ATOM   2423  N   ASN   145      61.674  55.911  54.175  0.00  0.00
ATOM   2424  H   ASN   145      62.468  56.190  54.691  0.00  0.00
ATOM   2425  CA  ASN   145      60.365  56.397  54.608  0.00  0.00
ATOM   2426  HA  ASN   145      59.762  55.537  54.863  0.00  0.00
ATOM   2427  CB  ASN   145      60.515  57.215  55.891  0.00  0.00
ATOM   2428  HB2 ASN   145      61.013  56.621  56.640  0.00  0.00
ATOM   2429  HB3 ASN   145      61.139  58.074  55.706  0.00  0.00
ATOM   2430  CG  ASN   145      59.191  57.688  56.466  0.00  0.00
ATOM   2431  OD1 ASN   145      58.290  58.049  55.856  0.00  0.00
ATOM   2432  ND2 ASN   145      59.011  57.702  57.647  0.00  0.00
ATOM   2433 1HD2 ASN   145      58.136  57.983  58.026  0.00  0.00
ATOM   2434 2HD2 ASN   145      59.722  57.402  58.180  0.00  0.00
ATOM   2435  C   ASN   145      59.624  57.149  53.483  0.00  0.00
ATOM   2436  O   ASN   145      60.017  58.238  53.080  0.00  0.00
ATOM   2437  N   TYR   146      58.561  56.536  52.977  0.00  0.00
ATOM   2438  H   TYR   146      58.307  55.661  53.383  0.00  0.00
ATOM   2439  CA  TYR   146      57.786  57.005  51.826  0.00  0.00
ATOM   2440  HA  TYR   146      58.446  57.057  50.970  0.00  0.00
ATOM   2441  CB  TYR   146      56.684  55.982  51.538  0.00  0.00
ATOM   2442  HB2 TYR   146      57.115  54.998  51.620  0.00  0.00
ATOM   2443  HB3 TYR   146      55.921  56.058  52.293  0.00  0.00
ATOM   2444  CG  TYR   146      56.027  56.063  50.180  0.00  0.00
ATOM   2445  CD1 TYR   146      56.412  55.183  49.160  0.00  0.00
ATOM   2446  HD1 TYR   146      57.194  54.484  49.339  0.00  0.00
ATOM   2447  CE1 TYR   146      55.758  55.192  47.922  0.00  0.00
ATOM   2448  HE1 TYR   146      56.051  54.499  47.161  0.00  0.00
ATOM   2449  CZ  TYR   146      54.732  56.108  47.684  0.00  0.00
ATOM   2450  OH  TYR   146      54.131  56.146  46.479  0.00  0.00
ATOM   2451  HH  TYR   146      54.642  55.669  45.838  0.00  0.00
ATOM   2452  CE2 TYR   146      54.341  56.985  48.699  0.00  0.00
ATOM   2453  HE2 TYR   146      53.560  57.688  48.517  0.00  0.00
ATOM   2454  CD2 TYR   146      54.991  56.970  49.940  0.00  0.00
ATOM   2455  HD2 TYR   146      54.682  57.647  50.710  0.00  0.00
ATOM   2456  C   TYR   146      57.221  58.403  52.049  0.00  0.00
ATOM   2457  O   TYR   146      57.349  59.261  51.199  0.00  0.00
ATOM   2458  N   HIE   147      56.644  58.657  53.219  0.00  0.00
ATOM   2459  H   HIE   147      56.616  57.931  53.889  0.00  0.00
ATOM   2460  CA  HIE   147      56.031  59.939  53.562  0.00  0.00
ATOM   2461  HA  HIE   147      55.352  60.217  52.767  0.00  0.00
ATOM   2462  CB  HIE   147      55.212  59.809  54.847  0.00  0.00
ATOM   2463  HB2 HIE   147      55.869  59.549  55.656  0.00  0.00
ATOM   2464  HB3 HIE   147      54.766  60.762  55.062  0.00  0.00
ATOM   2465  CG  HIE   147      54.105  58.802  54.819  0.00  0.00
ATOM   2466  ND1 HIE   147      53.553  58.213  53.985  0.00  0.00
ATOM   2467  CE1 HIE   147      52.606  57.398  54.305  0.00  0.00
ATOM   2468  HE1 HIE   147      51.996  56.784  53.846  0.00  0.00
ATOM   2469  NE2 HIE   147      52.535  57.455  55.269  0.00  0.00
ATOM   2470  HE2 HIE   147      51.911  56.925  55.670  0.00  0.00
ATOM   2471  CD2 HIE   147      53.472  58.336  55.619  0.00  0.00
ATOM   2472  HD2 HIE   147      53.676  58.599  56.378  0.00  0.00
ATOM   2473  C   HIE   147      57.054  61.063  53.707  0.00  0.00
ATOM   2474  O   HIE   147      56.792  62.176  53.264  0.00  0.00
ATOM   2475  N   ALA   148      58.233  60.765  54.243  0.00  0.00
ATOM   2476  H   ALA   148      58.367  59.843  54.591  0.00  0.00
ATOM   2477  CA  ALA   148      59.340  61.712  54.334  0.00  0.00
ATOM   2478  HA  ALA   148      58.982  62.623  54.795  0.00  0.00
ATOM   2479  CB  ALA   148      60.430  61.131  55.223  0.00  0.00
ATOM   2480  HB1 ALA   148      60.487  60.529  55.407  0.00  0.00
ATOM   2481  HB2 ALA   148      61.047  61.138  55.100  0.00  0.00
ATOM   2482  HB3 ALA   148      60.548  61.307  55.807  0.00  0.00
ATOM   2483  C   ALA   148      59.877  62.094  52.952  0.00  0.00
ATOM   2484  O   ALA   148      60.044  63.273  52.667  0.00  0.00
ATOM   2485  N   TRP   149      60.074  61.129  52.060  0.00  0.00
ATOM   2486  H   TRP   149      59.934  60.185  52.348  0.00  0.00
ATOM   2487  CA  TRP   149      60.479  61.395  50.675  0.00  0.00
ATOM   2488  HA  TRP   149      61.343  62.049  50.693  0.00  0.00
ATOM   2489  CB  TRP   149      60.897  60.098  49.986  0.00  0.00
ATOM   2490  HB2 TRP   149      60.207  59.304  50.227  0.00  0.00
ATOM   2491  HB3 TRP   149      60.867  60.253  48.918  0.00  0.00
ATOM   2492  CG  TRP   149      62.285  59.660  50.293  0.00  0.00
ATOM   2493  CD1 TRP   149      62.621  58.556  50.984  0.00  0.00
ATOM   2494  HD1 TRP   149      61.925  57.851  51.380  0.00  0.00
ATOM   2495  NE1 TRP   149      63.985  58.453  51.048  0.00  0.00
ATOM   2496  HE1 TRP   149      64.455  57.692  51.488  0.00  0.00
ATOM   2497  CE2 TRP   149      64.601  59.503  50.437  0.00  0.00
ATOM   2498  CZ2 TRP   149      65.937  59.853  50.273  0.00  0.00
ATOM   2499  HZ2 TRP   149      66.705  59.239  50.695  0.00  0.00
ATOM   2500  CH2 TRP   149      66.255  61.031  49.589  0.00  0.00
ATOM   2501  HH2 TRP   149      67.274  61.329  49.470  0.00  0.00
ATOM   2502  CZ3 TRP   149      65.236  61.830  49.077  0.00  0.00
ATOM   2503  HZ3 TRP   149      65.482  62.744  48.579  0.00  0.00
ATOM   2504  CE3 TRP   149      63.891  61.463  49.236  0.00  0.00
ATOM   2505  HE3 TRP   149      63.119  62.077  48.824  0.00  0.00
ATOM   2506  CD2 TRP   149      63.538  60.294  49.925  0.00  0.00
ATOM   2507  C   TRP   149      59.421  62.144  49.865  0.00  0.00
ATOM   2508  O   TRP   149      59.769  63.095  49.183  0.00  0.00
ATOM   2509  N   GLN   150      58.143  61.792  49.986  0.00  0.00
ATOM   2510  H   GLN   150      57.926  60.983  50.528  0.00  0.00
ATOM   2511  CA  GLN   150      57.037  62.512  49.352  0.00  0.00
ATOM   2512  HA  GLN   150      57.203  62.507  48.283  0.00  0.00
ATOM   2513  CB  GLN   150      55.736  61.756  49.642  0.00  0.00
ATOM   2514  HB2 GLN   150      55.798  60.859  49.332  0.00  0.00
ATOM   2515  HB3 GLN   150      55.592  61.697  50.579  0.00  0.00
ATOM   2516  CG  GLN   150      54.544  62.222  49.101  0.00  0.00
ATOM   2517  HG2 GLN   150      54.464  63.121  49.358  0.00  0.00
ATOM   2518  HG3 GLN   150      54.662  62.211  48.173  0.00  0.00
ATOM   2519  CD  GLN   150      53.286  61.489  49.441  0.00  0.00
ATOM   2520  OE1 GLN   150      53.156  60.460  49.600  0.00  0.00
ATOM   2521  NE2 GLN   150      52.310  61.985  49.589  0.00  0.00
ATOM   2522 1HE2 GLN   150      51.502  61.503  49.819  0.00  0.00
ATOM   2523 2HE2 GLN   150      52.378  62.837  49.496  0.00  0.00
ATOM   2524  C   GLN   150      56.968  63.987  49.787  0.00  0.00
ATOM   2525  O   GLN   150      56.786  64.869  48.965  0.00  0.00
ATOM   2526  N   HIE   151      57.185  64.275  51.070  0.00  0.00
ATOM   2527  H   HIE   151      57.283  63.520  51.709  0.00  0.00
ATOM   2528  CA  HIE   151      57.274  65.640  51.605  0.00  0.00
ATOM   2529  HA  HIE   151      56.422  66.207  51.255  0.00  0.00
ATOM   2530  CB  HIE   151      57.208  65.593  53.130  0.00  0.00
ATOM   2531  HB2 HIE   151      56.366  64.988  53.423  0.00  0.00
ATOM   2532  HB3 HIE   151      58.092  65.122  53.524  0.00  0.00
ATOM   2533  CG  HIE   151      57.048  66.943  53.771  0.00  0.00
ATOM   2534  ND1 HIE   151      55.909  67.665  53.828  0.00  0.00
ATOM   2535  CE1 HIE   151      56.195  68.778  54.498  0.00  0.00
ATOM   2536  HE1 HIE   151      55.513  69.539  54.726  0.00  0.00
ATOM   2537  NE2 HIE   151      57.431  68.787  54.875  0.00  0.00
ATOM   2538  HE2 HIE   151      57.867  69.489  55.433  0.00  0.00
ATOM   2539  CD2 HIE   151      57.988  67.635  54.416  0.00  0.00
ATOM   2540  HD2 HIE   151      58.972  67.324  54.539  0.00  0.00
ATOM   2541  C   HIE   151      58.537  66.366  51.126  0.00  0.00
ATOM   2542  O   HIE   151      58.448  67.486  50.658  0.00  0.00
ATOM   2543  N   ARG   152      59.705  65.718  51.158  0.00  0.00
ATOM   2544  H   ARG   152      59.709  64.803  51.556  0.00  0.00
ATOM   2545  CA  ARG   152      60.979  66.262  50.662  0.00  0.00
ATOM   2546  HA  ARG   152      61.181  67.175  51.206  0.00  0.00
ATOM   2547  CB  ARG   152      62.120  65.270  50.934  0.00  0.00
ATOM   2548  HB2 ARG   152      62.105  64.968  51.967  0.00  0.00
ATOM   2549  HB3 ARG   152      61.979  64.386  50.337  0.00  0.00
ATOM   2550  CG  ARG   152      63.484  65.885  50.607  0.00  0.00
ATOM   2551  HG2 ARG   152      63.564  66.014  49.549  0.00  0.00
ATOM   2552  HG3 ARG   152      63.569  66.840  51.071  0.00  0.00
ATOM   2553  CD  ARG   152      64.645  65.028  51.065  0.00  0.00
ATOM   2554  HD2 ARG   152      64.600  64.900  52.129  0.00  0.00
ATOM   2555  HD3 ARG   152      64.557  64.063  50.607  0.00  0.00
ATOM   2556  NE  ARG   152      65.907  65.635  50.656  0.00  0.00
ATOM   2557  HE  ARG   152      66.074  65.680  49.676  0.00  0.00
ATOM   2558  CZ  ARG   152      66.785  66.257  51.392  0.00  0.00
ATOM   2559  NH1 ARG   152      66.749  66.284  52.671  0.00  0.00
ATOM   2560 1HH1 ARG   152      66.060  65.773  53.169  0.00  0.00
ATOM   2561 2HH1 ARG   152      67.431  66.816  53.130  0.00  0.00
ATOM   2562  NH2 ARG   152      67.747  66.904  50.842  0.00  0.00
ATOM   2563 1HH2 ARG   152      67.781  66.926  49.853  0.00  0.00
ATOM   2564 2HH2 ARG   152      68.431  67.350  51.396  0.00  0.00
ATOM   2565  C   ARG   152      60.909  66.655  49.195  0.00  0.00
ATOM   2566  O   ARG   152      61.369  67.725  48.840  0.00  0.00
ATOM   2567  N   GLN   153      60.304  65.827  48.356  0.00  0.00
ATOM   2568  H   GLN   153      59.935  64.977  48.731  0.00  0.00
ATOM   2569  CA  GLN   153      60.098  66.094  46.932  0.00  0.00
ATOM   2570  HA  GLN   153      61.070  66.232  46.477  0.00  0.00
ATOM   2571  CB  GLN   153      59.418  64.885  46.284  0.00  0.00
ATOM   2572  HB2 GLN   153      59.514  64.212  46.705  0.00  0.00
ATOM   2573  HB3 GLN   153      58.606  64.933  46.182  0.00  0.00
ATOM   2574  CG  GLN   153      59.749  64.518  45.162  0.00  0.00
ATOM   2575  HG2 GLN   153      59.653  65.171  44.787  0.00  0.00
ATOM   2576  HG3 GLN   153      60.499  64.460  45.258  0.00  0.00
ATOM   2577  CD  GLN   153      59.208  63.356  44.411  0.00  0.00
ATOM   2578  OE1 GLN   153      58.049  63.246  44.167  0.00  0.00
ATOM   2579  NE2 GLN   153      60.020  62.454  44.026  0.00  0.00
ATOM   2580 1HE2 GLN   153      59.649  61.743  43.466  0.00  0.00
ATOM   2581 2HE2 GLN   153      60.965  62.514  44.257  0.00  0.00
ATOM   2582  C   GLN   153      59.312  67.375  46.666  0.00  0.00
ATOM   2583  O   GLN   153      59.663  68.125  45.787  0.00  0.00
ATOM   2584  N   TRP   154      58.291  67.659  47.458  0.00  0.00
ATOM   2585  H   TRP   154      58.055  67.011  48.165  0.00  0.00
ATOM   2586  CA  TRP   154      57.545  68.910  47.371  0.00  0.00
ATOM   2587  HA  TRP   154      57.319  69.114  46.336  0.00  0.00
ATOM   2588  CB  TRP   154      56.228  68.749  48.107  0.00  0.00
ATOM   2589  HB2 TRP   154      55.716  67.915  47.703  0.00  0.00
ATOM   2590  HB3 TRP   154      56.424  68.527  49.123  0.00  0.00
ATOM   2591  CG  TRP   154      55.315  69.905  48.057  0.00  0.00
ATOM   2592  CD1 TRP   154      54.682  70.360  47.008  0.00  0.00
ATOM   2593  HD1 TRP   154      54.747  69.942  46.072  0.00  0.00
ATOM   2594  NE1 TRP   154      53.935  71.439  47.327  0.00  0.00
ATOM   2595  HE1 TRP   154      53.377  71.928  46.701  0.00  0.00
ATOM   2596  CE2 TRP   154      54.052  71.738  48.590  0.00  0.00
ATOM   2597  CZ2 TRP   154      53.509  72.724  49.335  0.00  0.00
ATOM   2598  HZ2 TRP   154      52.862  73.437  48.919  0.00  0.00
ATOM   2599  CH2 TRP   154      53.834  72.764  50.622  0.00  0.00
ATOM   2600  HH2 TRP   154      53.439  73.517  51.213  0.00  0.00
ATOM   2601  CZ3 TRP   154      54.686  71.832  51.146  0.00  0.00
ATOM   2602  HZ3 TRP   154      54.909  71.858  52.134  0.00  0.00
ATOM   2603  CE3 TRP   154      55.224  70.840  50.397  0.00  0.00
ATOM   2604  HE3 TRP   154      55.855  70.118  50.821  0.00  0.00
ATOM   2605  CD2 TRP   154      54.930  70.776  49.087  0.00  0.00
ATOM   2606  C   TRP   154      58.348  70.106  47.887  0.00  0.00
ATOM   2607  O   TRP   154      58.409  71.136  47.231  0.00  0.00
ATOM   2608  N   VAL   155      59.041  69.960  49.012  0.00  0.00
ATOM   2609  H   VAL   155      58.956  69.093  49.499  0.00  0.00
ATOM   2610  CA  VAL   155      59.901  71.001  49.596  0.00  0.00
ATOM   2611  HA  VAL   155      59.292  71.874  49.760  0.00  0.00
ATOM   2612  CB  VAL   155      60.444  70.563  50.963  0.00  0.00
ATOM   2613  HB  VAL   155      60.840  69.584  50.880  0.00  0.00
ATOM   2614  CG1 VAL   155      61.541  71.445  51.508  0.00  0.00
ATOM   2615 1HG1 VAL   155      61.931  71.670  51.377  0.00  0.00
ATOM   2616 2HG1 VAL   155      61.591  71.851  51.730  0.00  0.00
ATOM   2617 3HG1 VAL   155      61.912  71.452  51.831  0.00  0.00
ATOM   2618  CG2 VAL   155      59.361  70.539  52.001  0.00  0.00
ATOM   2619 1HG2 VAL   155      59.017  70.677  52.185  0.00  0.00
ATOM   2620 2HG2 VAL   155      59.037  70.367  52.204  0.00  0.00
ATOM   2621 3HG2 VAL   155      59.223  70.532  52.383  0.00  0.00
ATOM   2622  C   VAL   155      61.009  71.435  48.646  0.00  0.00
ATOM   2623  O   VAL   155      61.189  72.626  48.451  0.00  0.00
ATOM   2624  N   ILE   156      61.718  70.511  47.996  0.00  0.00
ATOM   2625  H   ILE   156      61.545  69.555  48.196  0.00  0.00
ATOM   2626  CA  ILE   156      62.784  70.864  47.051  0.00  0.00
ATOM   2627  HA  ILE   156      63.345  71.674  47.495  0.00  0.00
ATOM   2628  CB  ILE   156      63.790  69.734  46.825  0.00  0.00
ATOM   2629  HB  ILE   156      64.581  70.142  46.220  0.00  0.00
ATOM   2630  CG2 ILE   156      64.436  69.319  48.143  0.00  0.00
ATOM   2631 1HG2 ILE   156      64.300  68.949  48.524  0.00  0.00
ATOM   2632 2HG2 ILE   156      64.923  69.106  48.257  0.00  0.00
ATOM   2633 3HG2 ILE   156      64.576  69.584  48.610  0.00  0.00
ATOM   2634  CG1 ILE   156      63.222  68.515  46.101  0.00  0.00
ATOM   2635 2HG1 ILE   156      63.274  67.833  46.602  0.00  0.00
ATOM   2636 3HG1 ILE   156      62.382  68.572  45.903  0.00  0.00
ATOM   2637  CD1 ILE   156      63.691  68.095  44.981  0.00  0.00
ATOM   2638 1HD1 ILE   156      63.686  67.849  44.661  0.00  0.00
ATOM   2639 2HD1 ILE   156      63.826  68.085  44.580  0.00  0.00
ATOM   2640 3HD1 ILE   156      63.884  68.024  44.876  0.00  0.00
ATOM   2641  C   ILE   156      62.264  71.447  45.741  0.00  0.00
ATOM   2642  O   ILE   156      62.955  72.240  45.134  0.00  0.00
ATOM   2643  N   GLN   157      61.051  71.113  45.328  0.00  0.00
ATOM   2644  H   GLN   157      60.549  70.463  45.878  0.00  0.00
ATOM   2645  CA  GLN   157      60.385  71.708  44.173  0.00  0.00
ATOM   2646  HA  GLN   157      61.084  71.726  43.349  0.00  0.00
ATOM   2647  CB  GLN   157      59.205  70.815  43.773  0.00  0.00
ATOM   2648  HB2 GLN   157      59.578  69.845  43.528  0.00  0.00
ATOM   2649  HB3 GLN   157      58.547  70.697  44.608  0.00  0.00
ATOM   2650  CG  GLN   157      58.395  71.324  42.588  0.00  0.00
ATOM   2651  HG2 GLN   157      58.001  72.267  42.792  0.00  0.00
ATOM   2652  HG3 GLN   157      59.012  71.422  41.757  0.00  0.00
ATOM   2653  CD  GLN   157      57.281  70.438  42.233  0.00  0.00
ATOM   2654  OE1 GLN   157      57.059  69.643  42.157  0.00  0.00
ATOM   2655  NE2 GLN   157      56.533  70.537  41.994  0.00  0.00
ATOM   2656 1HE2 GLN   157      55.816  69.949  41.766  0.00  0.00
ATOM   2657 2HE2 GLN   157      56.676  71.211  42.033  0.00  0.00
ATOM   2658  C   GLN   157      59.954  73.151  44.447  0.00  0.00
ATOM   2659  O   GLN   157      60.284  74.038  43.680  0.00  0.00
ATOM   2660  N   GLU   158      59.285  73.408  45.555  0.00  0.00
ATOM   2661  H   GLU   158      59.041  72.643  46.142  0.00  0.00
ATOM   2662  CA  GLU   158      58.829  74.737  45.966  0.00  0.00
ATOM   2663  HA  GLU   158      58.295  75.189  45.152  0.00  0.00
ATOM   2664  CB  GLU   158      57.877  74.624  47.143  0.00  0.00
ATOM   2665  HB2 GLU   158      58.333  74.063  47.913  0.00  0.00
ATOM   2666  HB3 GLU   158      57.691  75.599  47.522  0.00  0.00
ATOM   2667  CG  GLU   158      56.558  73.977  46.829  0.00  0.00
ATOM   2668  HG2 GLU   158      56.696  73.032  46.406  0.00  0.00
ATOM   2669  HG3 GLU   158      56.028  73.838  47.720  0.00  0.00
ATOM   2670  CD  GLU   158      55.735  74.803  45.945  0.00  0.00
ATOM   2671  OE1 GLU   158      55.346  75.361  45.938  0.00  0.00
ATOM   2672  OE2 GLU   158      55.470  74.898  45.235  0.00  0.00
ATOM   2673  C   GLU   158      59.977  75.686  46.314  0.00  0.00
ATOM   2674  O   GLU   158      59.834  76.858  46.224  0.00  0.00
ATOM   2675  N   PHE   159      61.122  75.184  46.678  0.00  0.00
ATOM   2676  H   PHE   159      61.136  74.216  46.811  0.00  0.00
ATOM   2677  CA  PHE   159      62.335  75.938  46.983  0.00  0.00
ATOM   2678  HA  PHE   159      62.070  76.982  47.063  0.00  0.00
ATOM   2679  CB  PHE   159      62.843  75.474  48.347  0.00  0.00
ATOM   2680  HB2 PHE   159      62.005  75.322  48.996  0.00  0.00
ATOM   2681  HB3 PHE   159      63.298  74.519  48.208  0.00  0.00
ATOM   2682  CG  PHE   159      63.790  76.369  49.101  0.00  0.00
ATOM   2683  CD1 PHE   159      63.613  77.682  49.202  0.00  0.00
ATOM   2684  HD1 PHE   159      62.812  78.083  48.726  0.00  0.00
ATOM   2685  CE1 PHE   159      64.472  78.491  49.922  0.00  0.00
ATOM   2686  HE1 PHE   159      64.337  79.493  49.982  0.00  0.00
ATOM   2687  CZ  PHE   159      65.509  77.988  50.555  0.00  0.00
ATOM   2688  HZ  PHE   159      66.179  78.606  51.091  0.00  0.00
ATOM   2689  CE2 PHE   159      65.700  76.680  50.475  0.00  0.00
ATOM   2690  HE2 PHE   159      66.503  76.311  50.959  0.00  0.00
ATOM   2691  CD2 PHE   159      64.831  75.876  49.753  0.00  0.00
ATOM   2692  HD2 PHE   159      64.958  74.876  49.696  0.00  0.00
ATOM   2693  C   PHE   159      63.411  75.860  45.894  0.00  0.00
ATOM   2694  O   PHE   159      64.486  76.391  46.066  0.00  0.00
ATOM   2695  N   ARG   160      63.118  75.208  44.764  0.00  0.00
ATOM   2696  H   ARG   160      62.212  74.812  44.722  0.00  0.00
ATOM   2697  CA  ARG   160      63.989  75.003  43.593  0.00  0.00
ATOM   2698  HA  ARG   160      63.572  74.192  43.026  0.00  0.00
ATOM   2699  CB  ARG   160      63.966  76.242  42.702  0.00  0.00
ATOM   2700  HB2 ARG   160      64.384  77.066  43.217  0.00  0.00
ATOM   2701  HB3 ARG   160      64.576  76.075  41.846  0.00  0.00
ATOM   2702  CG  ARG   160      62.589  76.615  42.213  0.00  0.00
ATOM   2703  HG2 ARG   160      62.280  76.086  41.608  0.00  0.00
ATOM   2704  HG3 ARG   160      62.024  76.587  42.849  0.00  0.00
ATOM   2705  CD  ARG   160      62.418  77.763  41.662  0.00  0.00
ATOM   2706  HD2 ARG   160      62.706  77.886  41.641  0.00  0.00
ATOM   2707  HD3 ARG   160      62.331  77.994  41.328  0.00  0.00
ATOM   2708  NE  ARG   160      62.000  78.378  41.594  0.00  0.00
ATOM   2709  HE  ARG   160      61.985  78.386  41.617  0.00  0.00
ATOM   2710  CZ  ARG   160      61.632  78.937  41.519  0.00  0.00
ATOM   2711  NH1 ARG   160      61.309  79.422  41.489  0.00  0.00
ATOM   2712 1HH1 ARG   160      61.352  79.365  41.539  0.00  0.00
ATOM   2713 2HH1 ARG   160      61.031  79.843  41.412  0.00  0.00
ATOM   2714  NH2 ARG   160      61.571  79.036  41.465  0.00  0.00
ATOM   2715 1HH2 ARG   160      61.805  78.698  41.477  0.00  0.00
ATOM   2716 2HH2 ARG   160      61.285  79.446  41.404  0.00  0.00
ATOM   2717  C   ARG   160      65.402  74.529  43.929  0.00  0.00
ATOM   2718  O   ARG   160      66.355  74.944  43.331  0.00  0.00
ATOM   2719  N   LEU   161      65.536  73.655  44.901  0.00  0.00
ATOM   2720  H   LEU   161      64.696  73.311  45.281  0.00  0.00
ATOM   2721  CA  LEU   161      66.789  73.204  45.523  0.00  0.00
ATOM   2722  HA  LEU   161      67.509  73.996  45.410  0.00  0.00
ATOM   2723  CB  LEU   161      66.519  73.028  47.019  0.00  0.00
ATOM   2724  HB2 LEU   161      65.844  73.781  47.337  0.00  0.00
ATOM   2725  HB3 LEU   161      66.038  72.104  47.153  0.00  0.00
ATOM   2726  CG  LEU   161      67.717  73.083  47.927  0.00  0.00
ATOM   2727  HG  LEU   161      68.423  72.380  47.606  0.00  0.00
ATOM   2728  CD1 LEU   161      68.346  74.407  47.933  0.00  0.00
ATOM   2729 1HD1 LEU   161      68.425  74.737  48.053  0.00  0.00
ATOM   2730 2HD1 LEU   161      68.635  74.688  47.934  0.00  0.00
ATOM   2731 3HD1 LEU   161      68.443  74.757  47.806  0.00  0.00
ATOM   2732  CD2 LEU   161      67.353  72.758  49.341  0.00  0.00
ATOM   2733 1HD2 LEU   161      67.173  72.702  49.654  0.00  0.00
ATOM   2734 2HD2 LEU   161      67.293  72.577  49.660  0.00  0.00
ATOM   2735 3HD2 LEU   161      67.329  72.730  49.735  0.00  0.00
ATOM   2736  C   LEU   161      67.404  71.980  44.815  0.00  0.00
ATOM   2737  O   LEU   161      67.988  71.136  45.427  0.00  0.00
ATOM   2738  N   TRP   162      67.231  71.867  43.517  0.00  0.00
ATOM   2739  H   TRP   162      66.756  72.601  43.096  0.00  0.00
ATOM   2740  CA  TRP   162      67.558  70.716  42.683  0.00  0.00
ATOM   2741  HA  TRP   162      67.051  69.850  43.062  0.00  0.00
ATOM   2742  CB  TRP   162      67.066  70.986  41.275  0.00  0.00
ATOM   2743  HB2 TRP   162      67.717  71.641  40.827  0.00  0.00
ATOM   2744  HB3 TRP   162      67.129  70.105  40.748  0.00  0.00
ATOM   2745  CG  TRP   162      65.709  71.496  41.082  0.00  0.00
ATOM   2746  CD1 TRP   162      65.396  72.715  40.730  0.00  0.00
ATOM   2747  HD1 TRP   162      66.091  73.466  40.552  0.00  0.00
ATOM   2748  NE1 TRP   162      64.066  72.818  40.569  0.00  0.00
ATOM   2749  HE1 TRP   162      63.619  73.611  40.234  0.00  0.00
ATOM   2750  CE2 TRP   162      63.447  71.664  40.811  0.00  0.00
ATOM   2751  CZ2 TRP   162      62.141  71.275  40.742  0.00  0.00
ATOM   2752  HZ2 TRP   162      61.402  71.947  40.454  0.00  0.00
ATOM   2753  CH2 TRP   162      61.826  69.984  41.026  0.00  0.00
ATOM   2754  HH2 TRP   162      60.834  69.657  40.966  0.00  0.00
ATOM   2755  CZ3 TRP   162      62.817  69.118  41.395  0.00  0.00
ATOM   2756  HZ3 TRP   162      62.579  68.138  41.620  0.00  0.00
ATOM   2757  CE3 TRP   162      64.127  69.526  41.451  0.00  0.00
ATOM   2758  HE3 TRP   162      64.887  68.864  41.719  0.00  0.00
ATOM   2759  CD2 TRP   162      64.476  70.805  41.161  0.00  0.00
ATOM   2760  C   TRP   162      69.044  70.375  42.631  0.00  0.00
ATOM   2761  O   TRP   162      69.389  69.211  42.706  0.00  0.00
ATOM   2762  N   ASP   163      69.924  71.355  42.515  0.00  0.00
ATOM   2763  H   ASP   163      69.583  72.290  42.474  0.00  0.00
ATOM   2764  CA  ASP   163      71.366  71.136  42.401  0.00  0.00
ATOM   2765  HA  ASP   163      71.540  70.425  41.614  0.00  0.00
ATOM   2766  CB  ASP   163      72.027  72.439  42.010  0.00  0.00
ATOM   2767  HB2 ASP   163      71.573  72.821  41.137  0.00  0.00
ATOM   2768  HB3 ASP   163      71.885  73.153  42.769  0.00  0.00
ATOM   2769  CG  ASP   163      73.482  72.298  41.765  0.00  0.00
ATOM   2770  OD1 ASP   163      73.893  71.812  40.941  0.00  0.00
ATOM   2771  OD2 ASP   163      74.222  72.677  42.386  0.00  0.00
ATOM   2772  C   ASP   163      71.989  70.549  43.674  0.00  0.00
ATOM   2773  O   ASP   163      72.857  69.707  43.610  0.00  0.00
ATOM   2774  N   ASN   164      71.489  70.936  44.834  0.00  0.00
ATOM   2775  H   ASN   164      70.763  71.603  44.806  0.00  0.00
ATOM   2776  CA  ASN   164      71.848  70.355  46.119  0.00  0.00
ATOM   2777  HA  ASN   164      72.920  70.272  46.180  0.00  0.00
ATOM   2778  CB  ASN   164      71.372  71.292  47.220  0.00  0.00
ATOM   2779  HB2 ASN   164      71.741  72.275  47.048  0.00  0.00
ATOM   2780  HB3 ASN   164      70.311  71.335  47.225  0.00  0.00
ATOM   2781  CG  ASN   164      71.831  70.874  48.572  0.00  0.00
ATOM   2782  OD1 ASN   164      72.627  70.896  49.054  0.00  0.00
ATOM   2783  ND2 ASN   164      71.354  70.471  49.222  0.00  0.00
ATOM   2784 1HD2 ASN   164      71.651  70.194  50.103  0.00  0.00
ATOM   2785 2HD2 ASN   164      70.700  70.420  48.828  0.00  0.00
ATOM   2786  C   ASN   164      71.284  68.943  46.298  0.00  0.00
ATOM   2787  O   ASN   164      71.952  68.082  46.842  0.00  0.00
ATOM   2788  N   GLU   165      70.073  68.690  45.815  0.00  0.00
ATOM   2789  H   GLU   165      69.566  69.429  45.391  0.00  0.00
ATOM   2790  CA  GLU   165      69.447  67.376  45.905  0.00  0.00
ATOM   2791  HA  GLU   165      69.501  67.074  46.943  0.00  0.00
ATOM   2792  CB  GLU   165      67.974  67.452  45.487  0.00  0.00
ATOM   2793  HB2 GLU   165      67.526  68.341  45.902  0.00  0.00
ATOM   2794  HB3 GLU   165      67.915  67.532  44.413  0.00  0.00
ATOM   2795  CG  GLU   165      67.135  66.240  45.912  0.00  0.00
ATOM   2796  HG2 GLU   165      66.197  66.292  45.387  0.00  0.00
ATOM   2797  HG3 GLU   165      67.623  65.332  45.606  0.00  0.00
ATOM   2798  CD  GLU   165      66.842  66.175  47.407  0.00  0.00
ATOM   2799  OE1 GLU   165      65.994  65.379  47.808  0.00  0.00
ATOM   2800  OE2 GLU   165      67.432  66.919  48.191  0.00  0.00
ATOM   2801  C   GLU   165      70.197  66.323  45.093  0.00  0.00
ATOM   2802  O   GLU   165      70.390  65.222  45.582  0.00  0.00
ATOM   2803  N   LEU   166      70.712  66.649  43.910  0.00  0.00
ATOM   2804  H   LEU   166      70.521  67.560  43.557  0.00  0.00
ATOM   2805  CA  LEU   166      71.528  65.744  43.104  0.00  0.00
ATOM   2806  HA  LEU   166      70.960  64.841  42.971  0.00  0.00
ATOM   2807  CB  LEU   166      71.754  66.383  41.730  0.00  0.00
ATOM   2808  HB2 LEU   166      70.911  66.811  41.434  0.00  0.00
ATOM   2809  HB3 LEU   166      72.438  67.116  41.776  0.00  0.00
ATOM   2810  CG  LEU   166      72.182  65.524  40.681  0.00  0.00
ATOM   2811  HG  LEU   166      72.970  65.258  40.972  0.00  0.00
ATOM   2812  CD1 LEU   166      71.471  64.522  40.395  0.00  0.00
ATOM   2813 1HD1 LEU   166      71.429  64.281  40.213  0.00  0.00
ATOM   2814 2HD1 LEU   166      71.401  64.152  40.423  0.00  0.00
ATOM   2815 3HD1 LEU   166      71.106  64.379  40.335  0.00  0.00
ATOM   2816  CD2 LEU   166      72.281  66.049  39.407  0.00  0.00
ATOM   2817 1HD2 LEU   166      72.408  66.148  39.129  0.00  0.00
ATOM   2818 2HD2 LEU   166      72.212  66.090  39.053  0.00  0.00
ATOM   2819 3HD2 LEU   166      72.305  66.277  39.118  0.00  0.00
ATOM   2820  C   LEU   166      72.845  65.339  43.788  0.00  0.00
ATOM   2821  O   LEU   166      73.317  64.244  43.587  0.00  0.00
ATOM   2822  N   GLN   167      73.403  66.186  44.631  0.00  0.00
ATOM   2823  H   GLN   167      72.955  67.053  44.751  0.00  0.00
ATOM   2824  CA  GLN   167      74.575  65.876  45.454  0.00  0.00
ATOM   2825  HA  GLN   167      75.263  65.274  44.878  0.00  0.00
ATOM   2826  CB  GLN   167      75.287  67.164  45.855  0.00  0.00
ATOM   2827  HB2 GLN   167      74.740  67.791  46.178  0.00  0.00
ATOM   2828  HB3 GLN   167      75.868  67.026  46.523  0.00  0.00
ATOM   2829  CG  GLN   167      75.978  67.798  44.969  0.00  0.00
ATOM   2830  HG2 GLN   167      76.043  67.714  44.648  0.00  0.00
ATOM   2831  HG3 GLN   167      75.877  68.109  44.789  0.00  0.00
ATOM   2832  CD  GLN   167      76.714  68.181  44.764  0.00  0.00
ATOM   2833  OE1 GLN   167      77.375  68.008  45.078  0.00  0.00
ATOM   2834  NE2 GLN   167      76.618  68.722  44.249  0.00  0.00
ATOM   2835 1HE2 GLN   167      77.101  68.962  44.113  0.00  0.00
ATOM   2836 2HE2 GLN   167      76.086  68.884  43.962  0.00  0.00
ATOM   2837  C   GLN   167      74.221  65.051  46.700  0.00  0.00
ATOM   2838  O   GLN   167      74.987  64.186  47.077  0.00  0.00
ATOM   2839  N   TYR   168      73.060  65.262  47.304  0.00  0.00
ATOM   2840  H   TYR   168      72.497  66.014  46.982  0.00  0.00
ATOM   2841  CA  TYR   168      72.554  64.444  48.410  0.00  0.00
ATOM   2842  HA  TYR   168      73.328  64.350  49.159  0.00  0.00
ATOM   2843  CB  TYR   168      71.362  65.164  49.043  0.00  0.00
ATOM   2844  HB2 TYR   168      71.676  66.139  49.363  0.00  0.00
ATOM   2845  HB3 TYR   168      70.610  65.318  48.290  0.00  0.00
ATOM   2846  CG  TYR   168      70.731  64.475  50.235  0.00  0.00
ATOM   2847  CD1 TYR   168      71.451  64.281  51.399  0.00  0.00
ATOM   2848  HD1 TYR   168      72.462  64.587  51.431  0.00  0.00
ATOM   2849  CE1 TYR   168      70.856  63.686  52.518  0.00  0.00
ATOM   2850  HE1 TYR   168      71.417  63.522  53.398  0.00  0.00
ATOM   2851  CZ  TYR   168      69.531  63.303  52.483  0.00  0.00
ATOM   2852  OH  TYR   168      68.958  62.741  53.567  0.00  0.00
ATOM   2853  HH  TYR   168      69.576  62.593  54.258  0.00  0.00
ATOM   2854  CE2 TYR   168      68.808  63.481  51.308  0.00  0.00
ATOM   2855  HE2 TYR   168      67.796  63.175  51.278  0.00  0.00
ATOM   2856  CD2 TYR   168      69.405  64.061  50.189  0.00  0.00
ATOM   2857  HD2 TYR   168      68.846  64.201  49.300  0.00  0.00
ATOM   2858  C   TYR   168      72.167  63.033  47.964  0.00  0.00
ATOM   2859  O   TYR   168      72.521  62.065  48.609  0.00  0.00
ATOM   2860  N   VAL   169      71.536  62.906  46.800  0.00  0.00
ATOM   2861  H   VAL   169      71.245  63.747  46.349  0.00  0.00
ATOM   2862  CA  VAL   169      71.260  61.635  46.124  0.00  0.00
ATOM   2863  HA  VAL   169      70.650  61.033  46.783  0.00  0.00
ATOM   2864  CB  VAL   169      70.486  61.902  44.818  0.00  0.00
ATOM   2865  HB  VAL   169      70.910  62.775  44.350  0.00  0.00
ATOM   2866  CG1 VAL   169      70.538  60.788  43.789  0.00  0.00
ATOM   2867 1HG1 VAL   169      70.680  60.646  43.435  0.00  0.00
ATOM   2868 2HG1 VAL   169      70.604  60.402  43.660  0.00  0.00
ATOM   2869 3HG1 VAL   169      70.364  60.556  43.489  0.00  0.00
ATOM   2870  CG2 VAL   169      69.023  62.193  45.115  0.00  0.00
ATOM   2871 1HG2 VAL   169      68.766  62.375  45.532  0.00  0.00
ATOM   2872 2HG2 VAL   169      68.644  62.528  44.904  0.00  0.00
ATOM   2873 3HG2 VAL   169      68.579  61.895  45.108  0.00  0.00
ATOM   2874  C   VAL   169      72.530  60.831  45.872  0.00  0.00
ATOM   2875  O   VAL   169      72.574  59.652  46.176  0.00  0.00
ATOM   2876  N   ASP   170      73.584  61.463  45.376  0.00  0.00
ATOM   2877  H   ASP   170      73.503  62.429  45.156  0.00  0.00
ATOM   2878  CA  ASP   170      74.878  60.810  45.151  0.00  0.00
ATOM   2879  HA  ASP   170      74.727  59.974  44.491  0.00  0.00
ATOM   2880  CB  ASP   170      75.802  61.777  44.429  0.00  0.00
ATOM   2881  HB2 ASP   170      75.346  62.054  43.504  0.00  0.00
ATOM   2882  HB3 ASP   170      75.921  62.655  45.025  0.00  0.00
ATOM   2883  CG  ASP   170      77.160  61.187  44.112  0.00  0.00
ATOM   2884  OD1 ASP   170      77.252  60.273  43.327  0.00  0.00
ATOM   2885  OD2 ASP   170      78.138  61.623  44.660  0.00  0.00
ATOM   2886  C   ASP   170      75.518  60.275  46.438  0.00  0.00
ATOM   2887  O   ASP   170      76.012  59.167  46.454  0.00  0.00
ATOM   2888  N   GLN   171      75.457  61.032  47.523  0.00  0.00
ATOM   2889  H   GLN   171      75.018  61.915  47.437  0.00  0.00
ATOM   2890  CA  GLN   171      75.943  60.628  48.841  0.00  0.00
ATOM   2891  HA  GLN   171      76.974  60.331  48.737  0.00  0.00
ATOM   2892  CB  GLN   171      75.892  61.827  49.781  0.00  0.00
ATOM   2893  HB2 GLN   171      75.963  62.443  49.594  0.00  0.00
ATOM   2894  HB3 GLN   171      75.371  61.938  50.088  0.00  0.00
ATOM   2895  CG  GLN   171      76.438  62.077  50.575  0.00  0.00
ATOM   2896  HG2 GLN   171      76.365  61.516  50.838  0.00  0.00
ATOM   2897  HG3 GLN   171      76.970  61.937  50.287  0.00  0.00
ATOM   2898  CD  GLN   171      76.348  63.293  51.409  0.00  0.00
ATOM   2899  OE1 GLN   171      76.431  64.013  51.531  0.00  0.00
ATOM   2900  NE2 GLN   171      76.147  63.571  52.010  0.00  0.00
ATOM   2901 1HE2 GLN   171      76.073  64.357  52.553  0.00  0.00
ATOM   2902 2HE2 GLN   171      76.092  62.977  51.927  0.00  0.00
ATOM   2903  C   GLN   171      75.171  59.436  49.408  0.00  0.00
ATOM   2904  O   GLN   171      75.775  58.543  49.970  0.00  0.00
ATOM   2905  N   LEU   172      73.861  59.383  49.240  0.00  0.00
ATOM   2906  H   LEU   172      73.420  60.149  48.790  0.00  0.00
ATOM   2907  CA  LEU   172      73.031  58.277  49.713  0.00  0.00
ATOM   2908  HA  LEU   172      73.341  58.025  50.720  0.00  0.00
ATOM   2909  CB  LEU   172      71.569  58.722  49.783  0.00  0.00
ATOM   2910  HB2 LEU   172      71.313  59.204  48.862  0.00  0.00
ATOM   2911  HB3 LEU   172      70.961  57.843  49.867  0.00  0.00
ATOM   2912  CG  LEU   172      71.215  59.647  50.942  0.00  0.00
ATOM   2913  HG  LEU   172      71.764  60.513  50.875  0.00  0.00
ATOM   2914  CD1 LEU   172      69.802  60.008  50.878  0.00  0.00
ATOM   2915 1HD1 LEU   172      69.493  60.160  50.815  0.00  0.00
ATOM   2916 2HD1 LEU   172      69.437  60.035  50.839  0.00  0.00
ATOM   2917 3HD1 LEU   172      69.453  60.103  50.936  0.00  0.00
ATOM   2918  CD2 LEU   172      71.437  59.077  52.263  0.00  0.00
ATOM   2919 1HD2 LEU   172      71.537  59.097  52.670  0.00  0.00
ATOM   2920 2HD2 LEU   172      71.345  58.894  52.591  0.00  0.00
ATOM   2921 3HD2 LEU   172      71.623  58.849  52.499  0.00  0.00
ATOM   2922  C   LEU   172      73.194  56.992  48.891  0.00  0.00
ATOM   2923  O   LEU   172      73.163  55.909  49.456  0.00  0.00
ATOM   2924  N   LEU   173      73.447  57.073  47.587  0.00  0.00
ATOM   2925  H   LEU   173      73.433  57.975  47.164  0.00  0.00
ATOM   2926  CA  LEU   173      73.789  55.904  46.764  0.00  0.00
ATOM   2927  HA  LEU   173      73.116  55.100  47.033  0.00  0.00
ATOM   2928  CB  LEU   173      73.594  56.209  45.271  0.00  0.00
ATOM   2929  HB2 LEU   173      74.143  57.098  45.031  0.00  0.00
ATOM   2930  HB3 LEU   173      74.011  55.401  44.695  0.00  0.00
ATOM   2931  CG  LEU   173      72.138  56.397  44.842  0.00  0.00
ATOM   2932  HG  LEU   173      71.713  57.160  45.448  0.00  0.00
ATOM   2933  CD1 LEU   173      72.033  56.847  43.413  0.00  0.00
ATOM   2934 1HD1 LEU   173      72.004  57.012  43.075  0.00  0.00
ATOM   2935 2HD1 LEU   173      72.063  56.922  43.043  0.00  0.00
ATOM   2936 3HD1 LEU   173      71.955  56.928  43.083  0.00  0.00
ATOM   2937  CD2 LEU   173      71.314  55.154  44.978  0.00  0.00
ATOM   2938 1HD2 LEU   173      71.682  54.419  44.497  0.00  0.00
ATOM   2939 2HD2 LEU   173      71.234  54.874  45.891  0.00  0.00
ATOM   2940 3HD2 LEU   173      70.406  55.264  44.669  0.00  0.00
ATOM   2941  C   LEU   173      75.199  55.361  47.049  0.00  0.00
ATOM   2942  O   LEU   173      75.467  54.211  46.775  0.00  0.00
ATOM   2943  N   LYS   174      76.073  56.151  47.654  0.00  0.00
ATOM   2944  H   LYS   174      75.800  57.085  47.794  0.00  0.00
ATOM   2945  CA  LYS   174      77.359  55.714  48.219  0.00  0.00
ATOM   2946  HA  LYS   174      77.774  54.948  47.590  0.00  0.00
ATOM   2947  CB  LYS   174      78.333  56.880  48.240  0.00  0.00
ATOM   2948  HB2 LYS   174      77.895  57.712  48.527  0.00  0.00
ATOM   2949  HB3 LYS   174      79.056  56.724  48.878  0.00  0.00
ATOM   2950  CG  LYS   174      78.950  57.131  47.018  0.00  0.00
ATOM   2951  HG2 LYS   174      79.409  56.539  46.811  0.00  0.00
ATOM   2952  HG3 LYS   174      78.421  57.153  46.454  0.00  0.00
ATOM   2953  CD  LYS   174      79.674  58.169  46.847  0.00  0.00
ATOM   2954  HD2 LYS   174      79.348  58.623  47.139  0.00  0.00
ATOM   2955  HD3 LYS   174      80.185  58.134  47.197  0.00  0.00
ATOM   2956  CE  LYS   174      80.142  58.618  45.806  0.00  0.00
ATOM   2957  HE2 LYS   174      80.596  58.475  45.757  0.00  0.00
ATOM   2958  HE3 LYS   174      79.906  58.376  45.472  0.00  0.00
ATOM   2959  NZ  LYS   174      80.321  59.549  45.316  0.00  0.00
ATOM   2960  HZ1 LYS   174      80.370  59.772  45.092  0.00  0.00
ATOM   2961  HZ2 LYS   174      80.281  59.765  45.259  0.00  0.00
ATOM   2962  HZ3 LYS   174      80.433  59.810  45.219  0.00  0.00
ATOM   2963  C   LYS   174      77.239  55.060  49.589  0.00  0.00
ATOM   2964  O   LYS   174      78.172  54.524  50.038  0.00  0.00
ATOM   2965  N   GLU   175      76.118  55.055  50.228  0.00  0.00
ATOM   2966  H   GLU   175      75.418  55.553  49.819  0.00  0.00
ATOM   2967  CA  GLU   175      75.844  54.376  51.490  0.00  0.00
ATOM   2968  HA  GLU   175      76.757  54.002  51.891  0.00  0.00
ATOM   2969  CB  GLU   175      75.305  55.359  52.489  0.00  0.00
ATOM   2970  HB2 GLU   175      75.369  55.813  52.525  0.00  0.00
ATOM   2971  HB3 GLU   175      74.882  55.458  52.567  0.00  0.00
ATOM   2972  CG  GLU   175      75.264  55.610  53.360  0.00  0.00
ATOM   2973  HG2 GLU   175      75.117  55.377  53.104  0.00  0.00
ATOM   2974  HG3 GLU   175      75.464  55.501  53.458  0.00  0.00
ATOM   2975  CD  GLU   175      75.168  56.335  54.411  0.00  0.00
ATOM   2976  OE1 GLU   175      75.303  56.598  54.893  0.00  0.00
ATOM   2977  OE2 GLU   175      74.961  56.644  54.774  0.00  0.00
ATOM   2978  C   GLU   175      74.921  53.174  51.353  0.00  0.00
ATOM   2979  O   GLU   175      75.171  52.166  51.973  0.00  0.00
ATOM   2980  N   ASP   176      73.898  53.230  50.514  0.00  0.00
ATOM   2981  H   ASP   176      73.721  54.094  50.063  0.00  0.00
ATOM   2982  CA  ASP   176      73.054  52.088  50.157  0.00  0.00
ATOM   2983  HA  ASP   176      73.667  51.199  50.200  0.00  0.00
ATOM   2984  CB  ASP   176      71.909  51.906  51.154  0.00  0.00
ATOM   2985  HB2 ASP   176      72.323  51.862  52.144  0.00  0.00
ATOM   2986  HB3 ASP   176      71.251  52.755  51.109  0.00  0.00
ATOM   2987  CG  ASP   176      71.085  50.643  50.936  0.00  0.00
ATOM   2988  OD1 ASP   176      71.357  49.866  50.013  0.00  0.00
ATOM   2989  OD2 ASP   176      70.178  50.385  51.724  0.00  0.00
ATOM   2990  C   ASP   176      72.553  52.209  48.711  0.00  0.00
ATOM   2991  O   ASP   176      71.502  52.774  48.437  0.00  0.00
ATOM   2992  N   VAL   177      73.322  51.664  47.780  0.00  0.00
ATOM   2993  H   VAL   177      74.201  51.310  48.076  0.00  0.00
ATOM   2994  CA  VAL   177      73.017  51.625  46.343  0.00  0.00
ATOM   2995  HA  VAL   177      72.913  52.651  46.021  0.00  0.00
ATOM   2996  CB  VAL   177      74.217  51.023  45.585  0.00  0.00
ATOM   2997  HB  VAL   177      75.108  51.485  45.974  0.00  0.00
ATOM   2998  CG1 VAL   177      74.387  49.532  45.799  0.00  0.00
ATOM   2999 1HG1 VAL   177      74.360  49.149  45.870  0.00  0.00
ATOM   3000 2HG1 VAL   177      74.450  49.162  45.775  0.00  0.00
ATOM   3001 3HG1 VAL   177      74.486  49.183  45.906  0.00  0.00
ATOM   3002  CG2 VAL   177      74.198  51.310  44.104  0.00  0.00
ATOM   3003 1HG2 VAL   177      74.686  51.522  43.768  0.00  0.00
ATOM   3004 2HG2 VAL   177      74.082  50.900  43.649  0.00  0.00
ATOM   3005 3HG2 VAL   177      73.840  51.723  43.810  0.00  0.00
ATOM   3006  C   VAL   177      71.690  50.935  45.979  0.00  0.00
ATOM   3007  O   VAL   177      71.182  51.112  44.880  0.00  0.00
ATOM   3008  N   ARG   178      71.092  50.156  46.886  0.00  0.00
ATOM   3009  H   ARG   178      71.510  50.085  47.793  0.00  0.00
ATOM   3010  CA  ARG   178      69.818  49.455  46.675  0.00  0.00
ATOM   3011  HA  ARG   178      69.687  49.242  45.620  0.00  0.00
ATOM   3012  CB  ARG   178      69.834  48.123  47.429  0.00  0.00
ATOM   3013  HB2 ARG   178      69.925  48.327  48.481  0.00  0.00
ATOM   3014  HB3 ARG   178      68.888  47.630  47.274  0.00  0.00
ATOM   3015  CG  ARG   178      70.936  47.145  47.033  0.00  0.00
ATOM   3016  HG2 ARG   178      70.831  46.899  45.999  0.00  0.00
ATOM   3017  HG3 ARG   178      71.898  47.586  47.193  0.00  0.00
ATOM   3018  CD  ARG   178      70.813  45.882  47.865  0.00  0.00
ATOM   3019  HD2 ARG   178      70.945  46.134  48.904  0.00  0.00
ATOM   3020  HD3 ARG   178      69.828  45.476  47.734  0.00  0.00
ATOM   3021  NE  ARG   178      71.780  44.854  47.467  0.00  0.00
ATOM   3022  HE  ARG   178      71.453  44.182  46.819  0.00  0.00
ATOM   3023  CZ  ARG   178      72.997  44.680  47.912  0.00  0.00
ATOM   3024  NH1 ARG   178      73.536  45.463  48.764  0.00  0.00
ATOM   3025 1HH1 ARG   178      72.998  46.163  49.223  0.00  0.00
ATOM   3026 2HH1 ARG   178      74.495  45.315  48.997  0.00  0.00
ATOM   3027  NH2 ARG   178      73.711  43.692  47.502  0.00  0.00
ATOM   3028 1HH2 ARG   178      73.333  43.046  46.853  0.00  0.00
ATOM   3029 2HH2 ARG   178      74.633  43.546  47.832  0.00  0.00
ATOM   3030  C   ARG   178      68.593  50.284  47.078  0.00  0.00
ATOM   3031  O   ARG   178      67.480  49.828  46.898  0.00  0.00
ATOM   3032  N   ASN   179      68.774  51.477  47.637  0.00  0.00
ATOM   3033  H   ASN   179      69.714  51.781  47.766  0.00  0.00
ATOM   3034  CA  ASN   179      67.699  52.361  48.094  0.00  0.00
ATOM   3035  HA  ASN   179      67.061  51.784  48.753  0.00  0.00
ATOM   3036  CB  ASN   179      68.303  53.484  48.933  0.00  0.00
ATOM   3037  HB2 ASN   179      68.936  53.062  49.698  0.00  0.00
ATOM   3038  HB3 ASN   179      68.919  54.121  48.318  0.00  0.00
ATOM   3039  CG  ASN   179      67.261  54.343  49.605  0.00  0.00
ATOM   3040  OD1 ASN   179      66.123  54.419  49.214  0.00  0.00
ATOM   3041  ND2 ASN   179      67.616  55.006  50.657  0.00  0.00
ATOM   3042 1HD2 ASN   179      66.922  55.591  51.070  0.00  0.00
ATOM   3043 2HD2 ASN   179      68.575  55.054  50.909  0.00  0.00
ATOM   3044  C   ASN   179      66.812  52.885  46.943  0.00  0.00
ATOM   3045  O   ASN   179      67.148  53.850  46.271  0.00  0.00
ATOM   3046  N   ASN   180      65.667  52.254  46.726  0.00  0.00
ATOM   3047  H   ASN   180      65.484  51.452  47.279  0.00  0.00
ATOM   3048  CA  ASN   180      64.731  52.579  45.652  0.00  0.00
ATOM   3049  HA  ASN   180      65.272  52.505  44.718  0.00  0.00
ATOM   3050  CB  ASN   180      63.620  51.522  45.645  0.00  0.00
ATOM   3051  HB2 ASN   180      64.049  50.536  45.748  0.00  0.00
ATOM   3052  HB3 ASN   180      62.951  51.664  46.480  0.00  0.00
ATOM   3053  CG  ASN   180      62.830  51.527  44.358  0.00  0.00
ATOM   3054  OD1 ASN   180      63.351  51.187  43.323  0.00  0.00
ATOM   3055  ND2 ASN   180      61.581  51.852  44.397  0.00  0.00
ATOM   3056 1HD2 ASN   180      61.033  51.841  43.564  0.00  0.00
ATOM   3057 2HD2 ASN   180      61.180  52.168  45.254  0.00  0.00
ATOM   3058  C   ASN   180      64.166  54.012  45.731  0.00  0.00
ATOM   3059  O   ASN   180      63.988  54.651  44.709  0.00  0.00
ATOM   3060  N   SER   181      63.966  54.560  46.926  0.00  0.00
ATOM   3061  H   SER   181      64.153  54.003  47.729  0.00  0.00
ATOM   3062  CA  SER   181      63.506  55.938  47.131  0.00  0.00
ATOM   3063  HA  SER   181      62.580  56.085  46.593  0.00  0.00
ATOM   3064  CB  SER   181      63.236  56.224  48.598  0.00  0.00
ATOM   3065  HB2 SER   181      64.164  56.270  49.139  0.00  0.00
ATOM   3066  HB3 SER   181      62.739  57.175  48.667  0.00  0.00
ATOM   3067  OG  SER   181      62.420  55.256  49.190  0.00  0.00
ATOM   3068  HG  SER   181      61.628  55.195  48.684  0.00  0.00
ATOM   3069  C   SER   181      64.494  56.983  46.617  0.00  0.00
ATOM   3070  O   SER   181      64.093  58.021  46.113  0.00  0.00
ATOM   3071  N   VAL   182      65.789  56.702  46.689  0.00  0.00
ATOM   3072  H   VAL   182      66.047  55.823  47.077  0.00  0.00
ATOM   3073  CA  VAL   182      66.859  57.587  46.211  0.00  0.00
ATOM   3074  HA  VAL   182      66.581  58.612  46.424  0.00  0.00
ATOM   3075  CB  VAL   182      68.173  57.293  46.950  0.00  0.00
ATOM   3076  HB  VAL   182      68.435  56.260  46.804  0.00  0.00
ATOM   3077  CG1 VAL   182      69.321  58.147  46.477  0.00  0.00
ATOM   3078 1HG1 VAL   182      69.259  58.715  46.177  0.00  0.00
ATOM   3079 2HG1 VAL   182      69.781  58.390  46.866  0.00  0.00
ATOM   3080 3HG1 VAL   182      69.768  57.946  46.044  0.00  0.00
ATOM   3081  CG2 VAL   182      68.029  57.563  48.441  0.00  0.00
ATOM   3082 1HG2 VAL   182      67.918  57.408  48.837  0.00  0.00
ATOM   3083 2HG2 VAL   182      68.231  57.669  48.804  0.00  0.00
ATOM   3084 3HG2 VAL   182      67.839  57.810  48.773  0.00  0.00
ATOM   3085  C   VAL   182      67.017  57.491  44.691  0.00  0.00
ATOM   3086  O   VAL   182      67.182  58.518  44.041  0.00  0.00
ATOM   3087  N   TRP   183      66.875  56.310  44.084  0.00  0.00
ATOM   3088  H   TRP   183      66.758  55.495  44.646  0.00  0.00
ATOM   3089  CA  TRP   183      66.759  56.193  42.622  0.00  0.00
ATOM   3090  HA  TRP   183      67.620  56.674  42.171  0.00  0.00
ATOM   3091  CB  TRP   183      66.770  54.719  42.193  0.00  0.00
ATOM   3092  HB2 TRP   183      66.014  54.178  42.742  0.00  0.00
ATOM   3093  HB3 TRP   183      66.489  54.669  41.152  0.00  0.00
ATOM   3094  CG  TRP   183      68.079  54.013  42.322  0.00  0.00
ATOM   3095  CD1 TRP   183      68.403  53.130  43.278  0.00  0.00
ATOM   3096  HD1 TRP   183      67.757  52.828  44.074  0.00  0.00
ATOM   3097  NE1 TRP   183      69.678  52.660  43.068  0.00  0.00
ATOM   3098  HE1 TRP   183      70.154  52.070  43.718  0.00  0.00
ATOM   3099  CE2 TRP   183      70.254  53.220  41.969  0.00  0.00
ATOM   3100  CZ2 TRP   183      71.510  53.084  41.376  0.00  0.00
ATOM   3101  HZ2 TRP   183      72.234  52.417  41.791  0.00  0.00
ATOM   3102  CH2 TRP   183      71.812  53.850  40.250  0.00  0.00
ATOM   3103  HH2 TRP   183      72.767  53.769  39.777  0.00  0.00
ATOM   3104  CZ3 TRP   183      70.857  54.744  39.749  0.00  0.00
ATOM   3105  HZ3 TRP   183      71.083  55.336  38.888  0.00  0.00
ATOM   3106  CE3 TRP   183      69.598  54.872  40.348  0.00  0.00
ATOM   3107  HE3 TRP   183      68.880  55.551  39.943  0.00  0.00
ATOM   3108  CD2 TRP   183      69.261  54.111  41.476  0.00  0.00
ATOM   3109  C   TRP   183      65.521  56.917  42.063  0.00  0.00
ATOM   3110  O   TRP   183      65.618  57.587  41.048  0.00  0.00
ATOM   3111  N   ASN   184      64.388  56.877  42.767  0.00  0.00
ATOM   3112  H   ASN   184      64.329  56.256  43.545  0.00  0.00
ATOM   3113  CA  ASN   184      63.205  57.672  42.426  0.00  0.00
ATOM   3114  HA  ASN   184      62.950  57.450  41.398  0.00  0.00
ATOM   3115  CB  ASN   184      62.022  57.270  43.316  0.00  0.00
ATOM   3116  HB2 ASN   184      61.832  56.217  43.232  0.00  0.00
ATOM   3117  HB3 ASN   184      62.235  57.486  44.346  0.00  0.00
ATOM   3118  CG  ASN   184      60.783  58.012  42.896  0.00  0.00
ATOM   3119  OD1 ASN   184      60.163  57.708  41.914  0.00  0.00
ATOM   3120  ND2 ASN   184      60.396  59.031  43.581  0.00  0.00
ATOM   3121 1HD2 ASN   184      59.650  59.562  43.202  0.00  0.00
ATOM   3122 2HD2 ASN   184      60.883  59.310  44.397  0.00  0.00
ATOM   3123  C   ASN   184      63.475  59.179  42.488  0.00  0.00
ATOM   3124  O   ASN   184      63.115  59.908  41.576  0.00  0.00
ATOM   3125  N   GLN   185      64.147  59.656  43.536  0.00  0.00
ATOM   3126  H   GLN   185      64.394  59.025  44.268  0.00  0.00
ATOM   3127  CA  GLN   185      64.535  61.059  43.671  0.00  0.00
ATOM   3128  HA  GLN   185      63.633  61.646  43.546  0.00  0.00
ATOM   3129  CB  GLN   185      65.109  61.330  45.070  0.00  0.00
ATOM   3130  HB2 GLN   185      64.541  60.805  45.819  0.00  0.00
ATOM   3131  HB3 GLN   185      66.124  60.966  45.108  0.00  0.00
ATOM   3132  CG  GLN   185      65.099  62.813  45.452  0.00  0.00
ATOM   3133  HG2 GLN   185      65.784  62.936  46.273  0.00  0.00
ATOM   3134  HG3 GLN   185      65.472  63.416  44.644  0.00  0.00
ATOM   3135  CD  GLN   185      63.737  63.335  45.864  0.00  0.00
ATOM   3136  OE1 GLN   185      62.711  62.891  45.439  0.00  0.00
ATOM   3137  NE2 GLN   185      63.667  64.302  46.708  0.00  0.00
ATOM   3138 1HE2 GLN   185      62.774  64.627  46.969  0.00  0.00
ATOM   3139 2HE2 GLN   185      64.504  64.693  47.084  0.00  0.00
ATOM   3140  C   GLN   185      65.517  61.478  42.573  0.00  0.00
ATOM   3141  O   GLN   185      65.354  62.556  42.022  0.00  0.00
ATOM   3142  N   ARG   186      66.472  60.625  42.191  0.00  0.00
ATOM   3143  H   ARG   186      66.569  59.781  42.716  0.00  0.00
ATOM   3144  CA  ARG   186      67.369  60.866  41.052  0.00  0.00
ATOM   3145  HA  ARG   186      67.916  61.781  41.245  0.00  0.00
ATOM   3146  CB  ARG   186      68.374  59.707  40.908  0.00  0.00
ATOM   3147  HB2 ARG   186      68.738  59.412  41.879  0.00  0.00
ATOM   3148  HB3 ARG   186      67.889  58.855  40.460  0.00  0.00
ATOM   3149  CG  ARG   186      69.564  60.119  40.049  0.00  0.00
ATOM   3150  HG2 ARG   186      69.225  60.365  39.061  0.00  0.00
ATOM   3151  HG3 ARG   186      70.023  60.991  40.470  0.00  0.00
ATOM   3152  CD  ARG   186      70.606  59.015  39.935  0.00  0.00
ATOM   3153  HD2 ARG   186      70.933  58.726  40.914  0.00  0.00
ATOM   3154  HD3 ARG   186      70.150  58.164  39.468  0.00  0.00
ATOM   3155  NE  ARG   186      71.737  59.458  39.114  0.00  0.00
ATOM   3156  HE  ARG   186      71.626  59.415  38.127  0.00  0.00
ATOM   3157  CZ  ARG   186      72.830  60.047  39.506  0.00  0.00
ATOM   3158  NH1 ARG   186      73.164  60.150  40.740  0.00  0.00
ATOM   3159 1HH1 ARG   186      72.649  59.677  41.420  0.00  0.00
ATOM   3160 2HH1 ARG   186      74.035  60.563  40.947  0.00  0.00
ATOM   3161  NH2 ARG   186      73.634  60.567  38.663  0.00  0.00
ATOM   3162 1HH2 ARG   186      73.394  60.564  37.702  0.00  0.00
ATOM   3163 2HH2 ARG   186      74.470  60.980  38.965  0.00  0.00
ATOM   3164  C   ARG   186      66.592  61.091  39.757  0.00  0.00
ATOM   3165  O   ARG   186      66.817  62.088  39.085  0.00  0.00
ATOM   3166  N   HIE   187      65.631  60.222  39.441  0.00  0.00
ATOM   3167  H   HIE   187      65.502  59.436  40.046  0.00  0.00
ATOM   3168  CA  HIE   187      64.784  60.344  38.252  0.00  0.00
ATOM   3169  HA  HIE   187      65.420  60.373  37.376  0.00  0.00
ATOM   3170  CB  HIE   187      63.865  59.121  38.139  0.00  0.00
ATOM   3171  HB2 HIE   187      64.422  58.231  38.375  0.00  0.00
ATOM   3172  HB3 HIE   187      63.072  59.187  38.864  0.00  0.00
ATOM   3173  CG  HIE   187      63.280  58.961  36.773  0.00  0.00
ATOM   3174  ND1 HIE   187      62.119  59.544  36.330  0.00  0.00
ATOM   3175  CE1 HIE   187      61.982  59.175  35.061  0.00  0.00
ATOM   3176  HE1 HIE   187      61.193  59.479  34.423  0.00  0.00
ATOM   3177  NE2 HIE   187      62.978  58.402  34.694  0.00  0.00
ATOM   3178  HE2 HIE   187      63.088  58.023  33.787  0.00  0.00
ATOM   3179  CD2 HIE   187      63.813  58.254  35.764  0.00  0.00
ATOM   3180  HD2 HIE   187      64.705  57.695  35.805  0.00  0.00
ATOM   3181  C   HIE   187      63.978  61.649  38.246  0.00  0.00
ATOM   3182  O   HIE   187      63.946  62.339  37.235  0.00  0.00
ATOM   3183  N   PHE   188      63.399  62.024  39.389  0.00  0.00
ATOM   3184  H   PHE   188      63.469  61.400  40.166  0.00  0.00
ATOM   3185  CA  PHE   188      62.628  63.247  39.554  0.00  0.00
ATOM   3186  HA  PHE   188      61.866  63.259  38.786  0.00  0.00
ATOM   3187  CB  PHE   188      61.922  63.219  40.911  0.00  0.00
ATOM   3188  HB2 PHE   188      61.358  62.305  40.987  0.00  0.00
ATOM   3189  HB3 PHE   188      62.657  63.207  41.693  0.00  0.00
ATOM   3190  CG  PHE   188      60.979  64.366  41.149  0.00  0.00
ATOM   3191  CD1 PHE   188      59.759  64.407  40.529  0.00  0.00
ATOM   3192  HD1 PHE   188      59.482  63.625  39.889  0.00  0.00
ATOM   3193  CE1 PHE   188      58.885  65.459  40.750  0.00  0.00
ATOM   3194  HE1 PHE   188      57.953  65.478  40.276  0.00  0.00
ATOM   3195  CZ  PHE   188      59.226  66.484  41.596  0.00  0.00
ATOM   3196  HZ  PHE   188      58.564  67.297  41.751  0.00  0.00
ATOM   3197  CE2 PHE   188      60.443  66.450  42.225  0.00  0.00
ATOM   3198  HE2 PHE   188      60.696  67.236  42.877  0.00  0.00
ATOM   3199  CD2 PHE   188      61.318  65.393  42.001  0.00  0.00
ATOM   3200  HD2 PHE   188      62.257  65.386  42.478  0.00  0.00
ATOM   3201  C   PHE   188      63.458  64.524  39.398  0.00  0.00
ATOM   3202  O   PHE   188      63.046  65.440  38.705  0.00  0.00
ATOM   3203  N   VAL   189      64.648  64.575  39.993  0.00  0.00
ATOM   3204  H   VAL   189      64.922  63.795  40.548  0.00  0.00
ATOM   3205  CA  VAL   189      65.560  65.724  39.893  0.00  0.00
ATOM   3206  HA  VAL   189      64.996  66.618  40.116  0.00  0.00
ATOM   3207  CB  VAL   189      66.711  65.620  40.906  0.00  0.00
ATOM   3208  HB  VAL   189      66.990  64.788  40.985  0.00  0.00
ATOM   3209  CG1 VAL   189      67.807  66.300  40.724  0.00  0.00
ATOM   3210 1HG1 VAL   189      68.256  66.309  41.126  0.00  0.00
ATOM   3211 2HG1 VAL   189      68.187  66.263  40.232  0.00  0.00
ATOM   3212 3HG1 VAL   189      67.779  66.828  40.710  0.00  0.00
ATOM   3213  CG2 VAL   189      66.417  65.985  42.095  0.00  0.00
ATOM   3214 1HG2 VAL   189      66.306  66.065  42.397  0.00  0.00
ATOM   3215 2HG2 VAL   189      66.393  65.988  42.378  0.00  0.00
ATOM   3216 3HG2 VAL   189      66.327  66.156  42.413  0.00  0.00
ATOM   3217  C   VAL   189      66.076  65.896  38.470  0.00  0.00
ATOM   3218  O   VAL   189      66.061  67.006  37.955  0.00  0.00
ATOM   3219  N   ILE   190      66.467  64.819  37.797  0.00  0.00
ATOM   3220  H   ILE   190      66.461  63.933  38.259  0.00  0.00
ATOM   3221  CA  ILE   190      66.896  64.855  36.396  0.00  0.00
ATOM   3222  HA  ILE   190      67.675  65.596  36.282  0.00  0.00
ATOM   3223  CB  ILE   190      67.503  63.489  36.007  0.00  0.00
ATOM   3224  HB  ILE   190      66.847  62.711  36.342  0.00  0.00
ATOM   3225  CG2 ILE   190      67.667  63.335  34.505  0.00  0.00
ATOM   3226 1HG2 ILE   190      67.847  63.385  34.143  0.00  0.00
ATOM   3227 2HG2 ILE   190      67.703  63.121  34.196  0.00  0.00
ATOM   3228 3HG2 ILE   190      67.547  63.360  34.080  0.00  0.00
ATOM   3229  CG1 ILE   190      68.857  63.319  36.691  0.00  0.00
ATOM   3230 2HG1 ILE   190      69.180  63.731  36.806  0.00  0.00
ATOM   3231 3HG1 ILE   190      68.904  63.113  37.209  0.00  0.00
ATOM   3232  CD1 ILE   190      69.740  62.826  36.600  0.00  0.00
ATOM   3233 1HD1 ILE   190      69.891  62.605  36.627  0.00  0.00
ATOM   3234 2HD1 ILE   190      69.888  62.722  36.389  0.00  0.00
ATOM   3235 3HD1 ILE   190      70.078  62.797  36.718  0.00  0.00
ATOM   3236  C   ILE   190      65.760  65.311  35.474  0.00  0.00
ATOM   3237  O   ILE   190      65.966  66.182  34.641  0.00  0.00
ATOM   3238  N   SER   191      64.541  64.833  35.698  0.00  0.00
ATOM   3239  H   SER   191      64.445  64.134  36.403  0.00  0.00
ATOM   3240  CA  SER   191      63.313  65.273  35.022  0.00  0.00
ATOM   3241  HA  SER   191      63.464  65.156  33.959  0.00  0.00
ATOM   3242  CB  SER   191      62.135  64.395  35.415  0.00  0.00
ATOM   3243  HB2 SER   191      61.944  64.476  36.466  0.00  0.00
ATOM   3244  HB3 SER   191      61.258  64.729  34.894  0.00  0.00
ATOM   3245  OG  SER   191      62.378  63.060  35.093  0.00  0.00
ATOM   3246  HG  SER   191      62.868  62.674  35.787  0.00  0.00
ATOM   3247  C   SER   191      62.928  66.741  35.252  0.00  0.00
ATOM   3248  O   SER   191      61.982  67.207  34.662  0.00  0.00
ATOM   3249  N   ASN   192      63.641  67.475  36.091  0.00  0.00
ATOM   3250  H   ASN   192      64.368  67.007  36.568  0.00  0.00
ATOM   3251  CA  ASN   192      63.441  68.890  36.387  0.00  0.00
ATOM   3252  HA  ASN   192      62.729  69.302  35.690  0.00  0.00
ATOM   3253  CB  ASN   192      62.866  69.007  37.801  0.00  0.00
ATOM   3254  HB2 ASN   192      63.425  68.394  38.481  0.00  0.00
ATOM   3255  HB3 ASN   192      62.946  70.021  38.138  0.00  0.00
ATOM   3256  CG  ASN   192      61.412  68.638  37.867  0.00  0.00
ATOM   3257  OD1 ASN   192      60.563  69.407  37.523  0.00  0.00
ATOM   3258  ND2 ASN   192      61.074  67.472  38.297  0.00  0.00
ATOM   3259 1HD2 ASN   192      60.126  67.236  38.365  0.00  0.00
ATOM   3260 2HD2 ASN   192      61.772  66.826  38.558  0.00  0.00
ATOM   3261  C   ASN   192      64.712  69.741  36.192  0.00  0.00
ATOM   3262  O   ASN   192      64.720  70.909  36.526  0.00  0.00
ATOM   3263  N   THR   193      65.782  69.185  35.630  0.00  0.00
ATOM   3264  H   THR   193      65.721  68.224  35.389  0.00  0.00
ATOM   3265  CA  THR   193      67.077  69.866  35.420  0.00  0.00
ATOM   3266  HA  THR   193      66.929  70.932  35.491  0.00  0.00
ATOM   3267  CB  THR   193      68.096  69.497  36.493  0.00  0.00
ATOM   3268  HB  THR   193      69.051  69.912  36.215  0.00  0.00
ATOM   3269  CG2 THR   193      67.747  70.039  37.856  0.00  0.00
ATOM   3270 1HG2 THR   193      67.571  70.152  38.187  0.00  0.00
ATOM   3271 2HG2 THR   193      67.702  70.271  38.164  0.00  0.00
ATOM   3272 3HG2 THR   193      67.748  70.116  38.239  0.00  0.00
ATOM   3273  OG1 THR   193      68.228  68.110  36.612  0.00  0.00
ATOM   3274  HG1 THR   193      67.502  67.797  37.085  0.00  0.00
ATOM   3275  C   THR   193      67.690  69.640  34.040  0.00  0.00
ATOM   3276  O   THR   193      68.763  70.117  33.781  0.00  0.00
ATOM   3277  N   THR   194      67.021  68.953  33.132  0.00  0.00
ATOM   3278  H   THR   194      66.123  68.664  33.376  0.00  0.00
ATOM   3279  CA  THR   194      67.435  68.785  31.730  0.00  0.00
ATOM   3280  HA  THR   194      68.494  68.732  31.716  0.00  0.00
ATOM   3281  CB  THR   194      67.041  70.007  30.949  0.00  0.00
ATOM   3282  HB  THR   194      67.261  70.852  31.545  0.00  0.00
ATOM   3283  CG2 THR   194      67.732  70.184  29.652  0.00  0.00
ATOM   3284 1HG2 THR   194      68.058  70.235  29.430  0.00  0.00
ATOM   3285 2HG2 THR   194      67.827  70.077  29.292  0.00  0.00
ATOM   3286 3HG2 THR   194      67.818  70.382  29.297  0.00  0.00
ATOM   3287  OG1 THR   194      65.707  70.032  30.713  0.00  0.00
ATOM   3288  HG1 THR   194      65.391  70.260  30.811  0.00  0.00
ATOM   3289  C   THR   194      66.960  67.496  31.082  0.00  0.00
ATOM   3290  O   THR   194      67.092  67.309  29.935  0.00  0.00
ATOM   3291  N   GLY   195      66.413  66.572  31.795  0.00  0.00
ATOM   3292  H   GLY   195      66.342  66.748  32.729  0.00  0.00
ATOM   3293  CA  GLY   195      65.906  65.295  31.312  0.00  0.00
ATOM   3294  HA2 GLY   195      65.314  64.825  32.073  0.00  0.00
ATOM   3295  HA3 GLY   195      65.269  65.469  30.472  0.00  0.00
ATOM   3296  C   GLY   195      66.981  64.309  30.885  0.00  0.00
ATOM   3297  O   GLY   195      68.107  64.366  31.335  0.00  0.00
ATOM   3298  N   TYR   196      66.598  63.373  30.038  0.00  0.00
ATOM   3299  H   TYR   196      65.645  63.385  29.767  0.00  0.00
ATOM   3300  CA  TYR   196      67.399  62.246  29.566  0.00  0.00
ATOM   3301  HA  TYR   196      68.445  62.513  29.628  0.00  0.00
ATOM   3302  CB  TYR   196      67.166  61.055  30.507  0.00  0.00
ATOM   3303  HB2 TYR   196      67.615  60.168  30.099  0.00  0.00
ATOM   3304  HB3 TYR   196      67.699  61.251  31.420  0.00  0.00
ATOM   3305  CG  TYR   196      65.728  60.756  30.859  0.00  0.00
ATOM   3306  CD1 TYR   196      64.858  60.197  29.936  0.00  0.00
ATOM   3307  HD1 TYR   196      65.212  59.957  28.967  0.00  0.00
ATOM   3308  CE1 TYR   196      63.526  59.956  30.274  0.00  0.00
ATOM   3309  HE1 TYR   196      62.861  59.538  29.569  0.00  0.00
ATOM   3310  CZ  TYR   196      63.053  60.273  31.537  0.00  0.00
ATOM   3311  OH  TYR   196      61.760  60.077  31.853  0.00  0.00
ATOM   3312  HH  TYR   196      61.269  59.737  31.131  0.00  0.00
ATOM   3313  CE2 TYR   196      63.916  60.836  32.464  0.00  0.00
ATOM   3314  HE2 TYR   196      63.547  61.088  33.425  0.00  0.00
ATOM   3315  CD2 TYR   196      65.256  61.067  32.126  0.00  0.00
ATOM   3316  HD2 TYR   196      65.916  61.485  32.842  0.00  0.00
ATOM   3317  C   TYR   196      67.136  61.893  28.092  0.00  0.00
ATOM   3318  O   TYR   196      67.537  60.846  27.627  0.00  0.00
ATOM   3319  N   SER   197      66.465  62.748  27.331  0.00  0.00
ATOM   3320  H   SER   197      66.207  63.613  27.744  0.00  0.00
ATOM   3321  CA  SER   197      66.029  62.501  25.950  0.00  0.00
ATOM   3322  HA  SER   197      65.714  61.477  25.880  0.00  0.00
ATOM   3323  CB  SER   197      64.823  63.372  25.633  0.00  0.00
ATOM   3324  HB2 SER   197      65.078  64.349  25.638  0.00  0.00
ATOM   3325  HB3 SER   197      64.449  63.161  24.711  0.00  0.00
ATOM   3326  OG  SER   197      63.849  63.197  26.500  0.00  0.00
ATOM   3327  HG  SER   197      63.346  62.666  26.292  0.00  0.00
ATOM   3328  C   SER   197      67.099  62.682  24.871  0.00  0.00
ATOM   3329  O   SER   197      66.793  62.585  23.705  0.00  0.00
ATOM   3330  N   ASP   198      68.344  62.939  25.219  0.00  0.00
ATOM   3331  H   ASP   198      68.549  62.976  26.180  0.00  0.00
ATOM   3332  CA  ASP   198      69.440  63.165  24.286  0.00  0.00
ATOM   3333  HA  ASP   198      69.271  62.604  23.387  0.00  0.00
ATOM   3334  CB  ASP   198      69.470  64.644  23.925  0.00  0.00
ATOM   3335  HB2 ASP   198      68.498  64.941  23.610  0.00  0.00
ATOM   3336  HB3 ASP   198      69.710  65.213  24.780  0.00  0.00
ATOM   3337  CG  ASP   198      70.447  64.963  22.841  0.00  0.00
ATOM   3338  OD1 ASP   198      71.082  65.198  22.662  0.00  0.00
ATOM   3339  OD2 ASP   198      70.587  64.972  22.163  0.00  0.00
ATOM   3340  C   ASP   198      70.787  62.729  24.859  0.00  0.00
ATOM   3341  O   ASP   198      71.024  62.845  26.051  0.00  0.00
ATOM   3342  N   ARG   199      71.707  62.273  24.007  0.00  0.00
ATOM   3343  H   ARG   199      71.456  62.237  23.045  0.00  0.00
ATOM   3344  CA  ARG   199      73.047  61.799  24.386  0.00  0.00
ATOM   3345  HA  ARG   199      72.936  60.902  24.974  0.00  0.00
ATOM   3346  CB  ARG   199      73.852  61.430  23.138  0.00  0.00
ATOM   3347  HB2 ARG   199      73.816  62.230  22.439  0.00  0.00
ATOM   3348  HB3 ARG   199      74.875  61.300  23.419  0.00  0.00
ATOM   3349  CG  ARG   199      73.376  60.160  22.475  0.00  0.00
ATOM   3350  HG2 ARG   199      73.397  59.362  23.162  0.00  0.00
ATOM   3351  HG3 ARG   199      72.378  60.284  22.147  0.00  0.00
ATOM   3352  CD  ARG   199      74.225  59.789  21.288  0.00  0.00
ATOM   3353  HD2 ARG   199      74.069  59.347  20.901  0.00  0.00
ATOM   3354  HD3 ARG   199      74.313  60.189  20.868  0.00  0.00
ATOM   3355  NE  ARG   199      75.099  59.465  21.200  0.00  0.00
ATOM   3356  HE  ARG   199      75.048  59.439  21.710  0.00  0.00
ATOM   3357  CZ  ARG   199      75.986  59.232  20.522  0.00  0.00
ATOM   3358  NH1 ARG   199      76.216  59.240  19.794  0.00  0.00
ATOM   3359 1HH1 ARG   199      75.716  59.421  19.738  0.00  0.00
ATOM   3360 2HH1 ARG   199      76.905  59.055  19.299  0.00  0.00
ATOM   3361  NH2 ARG   199      76.686  58.978  20.583  0.00  0.00
ATOM   3362 1HH2 ARG   199      76.526  58.986  21.134  0.00  0.00
ATOM   3363 2HH2 ARG   199      77.359  58.787  20.098  0.00  0.00
ATOM   3364  C   ARG   199      73.822  62.777  25.264  0.00  0.00
ATOM   3365  O   ARG   199      74.483  62.340  26.182  0.00  0.00
ATOM   3366  N   ALA   200      73.682  64.077  25.043  0.00  0.00
ATOM   3367  H   ALA   200      73.095  64.356  24.293  0.00  0.00
ATOM   3368  CA  ALA   200      74.312  65.130  25.827  0.00  0.00
ATOM   3369  HA  ALA   200      75.369  64.991  25.765  0.00  0.00
ATOM   3370  CB  ALA   200      73.984  66.448  25.184  0.00  0.00
ATOM   3371  HB1 ALA   200      73.980  66.596  24.700  0.00  0.00
ATOM   3372  HB2 ALA   200      73.556  66.785  25.177  0.00  0.00
ATOM   3373  HB3 ALA   200      74.194  66.938  25.223  0.00  0.00
ATOM   3374  C   ALA   200      73.956  65.152  27.318  0.00  0.00
ATOM   3375  O   ALA   200      74.658  65.771  28.088  0.00  0.00
ATOM   3376  N   VAL   201      72.894  64.471  27.729  0.00  0.00
ATOM   3377  H   VAL   201      72.341  64.046  27.023  0.00  0.00
ATOM   3378  CA  VAL   201      72.423  64.354  29.118  0.00  0.00
ATOM   3379  HA  VAL   201      73.208  64.699  29.773  0.00  0.00
ATOM   3380  CB  VAL   201      71.187  65.242  29.356  0.00  0.00
ATOM   3381  HB  VAL   201      70.841  65.080  30.360  0.00  0.00
ATOM   3382  CG1 VAL   201      71.508  66.717  29.261  0.00  0.00
ATOM   3383 1HG1 VAL   201      71.448  67.121  29.328  0.00  0.00
ATOM   3384 2HG1 VAL   201      71.731  67.058  29.308  0.00  0.00
ATOM   3385 3HG1 VAL   201      71.573  67.059  29.078  0.00  0.00
ATOM   3386  CG2 VAL   201      70.034  64.954  28.419  0.00  0.00
ATOM   3387 1HG2 VAL   201      69.769  64.417  28.318  0.00  0.00
ATOM   3388 2HG2 VAL   201      69.453  65.202  28.438  0.00  0.00
ATOM   3389 3HG2 VAL   201      70.014  65.065  27.821  0.00  0.00
ATOM   3390  C   VAL   201      72.149  62.916  29.559  0.00  0.00
ATOM   3391  O   VAL   201      71.944  62.664  30.706  0.00  0.00
ATOM   3392  N   LEU   202      72.167  61.961  28.677  0.00  0.00
ATOM   3393  H   LEU   202      72.308  62.251  27.766  0.00  0.00
ATOM   3394  CA  LEU   202      71.877  60.545  28.911  0.00  0.00
ATOM   3395  HA  LEU   202      71.255  60.454  29.790  0.00  0.00
ATOM   3396  CB  LEU   202      71.093  60.031  27.700  0.00  0.00
ATOM   3397  HB2 LEU   202      70.180  60.585  27.630  0.00  0.00
ATOM   3398  HB3 LEU   202      71.671  60.243  26.821  0.00  0.00
ATOM   3399  CG  LEU   202      70.755  58.542  27.684  0.00  0.00
ATOM   3400  HG  LEU   202      71.660  57.972  27.762  0.00  0.00
ATOM   3401  CD1 LEU   202      69.829  58.137  28.804  0.00  0.00
ATOM   3402 1HD1 LEU   202      69.544  58.143  29.051  0.00  0.00
ATOM   3403 2HD1 LEU   202      69.587  57.935  29.010  0.00  0.00
ATOM   3404 3HD1 LEU   202      69.693  58.030  29.163  0.00  0.00
ATOM   3405  CD2 LEU   202      70.128  58.199  26.356  0.00  0.00
ATOM   3406 1HD2 LEU   202      69.762  58.245  26.095  0.00  0.00
ATOM   3407 2HD2 LEU   202      70.177  58.232  25.912  0.00  0.00
ATOM   3408 3HD2 LEU   202      69.989  57.857  26.079  0.00  0.00
ATOM   3409  C   LEU   202      73.127  59.699  29.139  0.00  0.00
ATOM   3410  O   LEU   202      73.139  58.881  30.043  0.00  0.00
ATOM   3411  N   GLU   203      74.178  59.860  28.339  0.00  0.00
ATOM   3412  H   GLU   203      74.139  60.571  27.642  0.00  0.00
ATOM   3413  CA  GLU   203      75.332  58.960  28.363  0.00  0.00
ATOM   3414  HA  GLU   203      74.974  57.953  28.211  0.00  0.00
ATOM   3415  CB  GLU   203      76.293  59.288  27.227  0.00  0.00
ATOM   3416  HB2 GLU   203      76.586  60.302  27.273  0.00  0.00
ATOM   3417  HB3 GLU   203      77.164  58.702  27.347  0.00  0.00
ATOM   3418  CG  GLU   203      75.717  58.984  25.882  0.00  0.00
ATOM   3419  HG2 GLU   203      75.244  58.203  25.900  0.00  0.00
ATOM   3420  HG3 GLU   203      75.117  59.627  25.608  0.00  0.00
ATOM   3421  CD  GLU   203      76.574  58.847  24.863  0.00  0.00
ATOM   3422  OE1 GLU   203      76.977  58.977  24.389  0.00  0.00
ATOM   3423  OE2 GLU   203      76.830  58.604  24.494  0.00  0.00
ATOM   3424  C   GLU   203      76.050  58.931  29.711  0.00  0.00
ATOM   3425  O   GLU   203      76.492  57.871  30.124  0.00  0.00
ATOM   3426  N   ARG   204      76.108  60.051  30.424  0.00  0.00
ATOM   3427  H   ARG   204      75.773  60.876  29.980  0.00  0.00
ATOM   3428  CA  ARG   204      76.617  60.152  31.792  0.00  0.00
ATOM   3429  HA  ARG   204      77.606  59.716  31.800  0.00  0.00
ATOM   3430  CB  ARG   204      76.758  61.624  32.174  0.00  0.00
ATOM   3431  HB2 ARG   204      77.301  61.682  33.099  0.00  0.00
ATOM   3432  HB3 ARG   204      77.351  62.103  31.417  0.00  0.00
ATOM   3433  CG  ARG   204      75.445  62.389  32.322  0.00  0.00
ATOM   3434  HG2 ARG   204      74.850  62.250  31.464  0.00  0.00
ATOM   3435  HG3 ARG   204      74.919  62.043  33.168  0.00  0.00
ATOM   3436  CD  ARG   204      75.670  63.857  32.493  0.00  0.00
ATOM   3437  HD2 ARG   204      76.332  64.017  33.223  0.00  0.00
ATOM   3438  HD3 ARG   204      76.073  64.209  31.656  0.00  0.00
ATOM   3439  NE  ARG   204      74.514  64.572  32.781  0.00  0.00
ATOM   3440  HE  ARG   204      73.813  64.123  33.170  0.00  0.00
ATOM   3441  CZ  ARG   204      74.312  65.775  32.668  0.00  0.00
ATOM   3442  NH1 ARG   204      75.122  66.506  32.206  0.00  0.00
ATOM   3443 1HH1 ARG   204      75.951  66.166  31.909  0.00  0.00
ATOM   3444 2HH1 ARG   204      74.898  67.410  32.158  0.00  0.00
ATOM   3445  NH2 ARG   204      73.250  66.277  33.023  0.00  0.00
ATOM   3446 1HH2 ARG   204      72.594  65.752  33.386  0.00  0.00
ATOM   3447 2HH2 ARG   204      73.091  67.187  32.931  0.00  0.00
ATOM   3448  C   ARG   204      75.800  59.371  32.822  0.00  0.00
ATOM   3449  O   ARG   204      76.367  58.835  33.744  0.00  0.00
ATOM   3450  N   GLU   205      74.495  59.264  32.664  0.00  0.00
ATOM   3451  H   GLU   205      74.102  59.674  31.860  0.00  0.00
ATOM   3452  CA  GLU   205      73.622  58.469  33.539  0.00  0.00
ATOM   3453  HA  GLU   205      73.955  58.566  34.566  0.00  0.00
ATOM   3454  CB  GLU   205      72.174  58.950  33.447  0.00  0.00
ATOM   3455  HB2 GLU   205      71.868  58.988  32.412  0.00  0.00
ATOM   3456  HB3 GLU   205      71.538  58.235  33.948  0.00  0.00
ATOM   3457  CG  GLU   205      71.937  60.312  34.091  0.00  0.00
ATOM   3458  HG2 GLU   205      72.524  61.054  33.580  0.00  0.00
ATOM   3459  HG3 GLU   205      70.904  60.581  33.956  0.00  0.00
ATOM   3460  CD  GLU   205      72.258  60.297  35.570  0.00  0.00
ATOM   3461  OE1 GLU   205      71.606  59.583  36.334  0.00  0.00
ATOM   3462  OE2 GLU   205      73.196  60.973  35.978  0.00  0.00
ATOM   3463  C   GLU   205      73.678  56.980  33.214  0.00  0.00
ATOM   3464  O   GLU   205      73.705  56.161  34.128  0.00  0.00
ATOM   3465  N   VAL   206      73.757  56.603  31.939  0.00  0.00
ATOM   3466  H   VAL   206      73.697  57.312  31.241  0.00  0.00
ATOM   3467  CA  VAL   206      73.972  55.216  31.511  0.00  0.00
ATOM   3468  HA  VAL   206      73.198  54.604  31.955  0.00  0.00
ATOM   3469  CB  VAL   206      73.865  55.068  29.987  0.00  0.00
ATOM   3470  HB  VAL   206      74.540  55.760  29.521  0.00  0.00
ATOM   3471  CG1 VAL   206      74.212  53.674  29.497  0.00  0.00
ATOM   3472 1HG1 VAL   206      74.076  53.348  29.233  0.00  0.00
ATOM   3473 2HG1 VAL   206      74.526  53.441  29.277  0.00  0.00
ATOM   3474 3HG1 VAL   206      74.299  53.220  29.602  0.00  0.00
ATOM   3475  CG2 VAL   206      72.454  55.384  29.517  0.00  0.00
ATOM   3476 1HG2 VAL   206      72.197  55.336  29.043  0.00  0.00
ATOM   3477 2HG2 VAL   206      71.986  55.221  29.670  0.00  0.00
ATOM   3478 3HG2 VAL   206      72.155  55.836  29.478  0.00  0.00
ATOM   3479  C   VAL   206      75.303  54.695  32.047  0.00  0.00
ATOM   3480  O   VAL   206      75.330  53.644  32.672  0.00  0.00
ATOM   3481  N   GLN   207      76.388  55.455  31.907  0.00  0.00
ATOM   3482  H   GLN   207      76.316  56.308  31.390  0.00  0.00
ATOM   3483  CA  GLN   207      77.704  55.082  32.431  0.00  0.00
ATOM   3484  HA  GLN   207      77.971  54.118  32.024  0.00  0.00
ATOM   3485  CB  GLN   207      78.734  56.107  31.957  0.00  0.00
ATOM   3486  HB2 GLN   207      78.637  56.250  30.969  0.00  0.00
ATOM   3487  HB3 GLN   207      78.596  56.993  32.367  0.00  0.00
ATOM   3488  CG  GLN   207      80.090  55.742  32.140  0.00  0.00
ATOM   3489  HG2 GLN   207      80.275  55.142  32.412  0.00  0.00
ATOM   3490  HG3 GLN   207      80.406  55.671  31.641  0.00  0.00
ATOM   3491  CD  GLN   207      80.821  56.283  32.588  0.00  0.00
ATOM   3492  OE1 GLN   207      80.712  57.005  32.593  0.00  0.00
ATOM   3493  NE2 GLN   207      81.587  55.972  32.976  0.00  0.00
ATOM   3494 1HE2 GLN   207      82.058  56.317  33.283  0.00  0.00
ATOM   3495 2HE2 GLN   207      81.684  55.383  32.977  0.00  0.00
ATOM   3496  C   GLN   207      77.702  54.929  33.957  0.00  0.00
ATOM   3497  O   GLN   207      78.172  53.922  34.460  0.00  0.00
ATOM   3498  N   TYR   208      77.123  55.879  34.685  0.00  0.00
ATOM   3499  H   TYR   208      76.771  56.681  34.211  0.00  0.00
ATOM   3500  CA  TYR   208      76.978  55.840  36.141  0.00  0.00
ATOM   3501  HA  TYR   208      77.959  55.790  36.589  0.00  0.00
ATOM   3502  CB  TYR   208      76.306  57.137  36.597  0.00  0.00
ATOM   3503  HB2 TYR   208      76.945  57.954  36.328  0.00  0.00
ATOM   3504  HB3 TYR   208      75.392  57.265  36.053  0.00  0.00
ATOM   3505  CG  TYR   208      75.999  57.256  38.072  0.00  0.00
ATOM   3506  CD1 TYR   208      76.929  57.776  38.933  0.00  0.00
ATOM   3507  HD1 TYR   208      77.855  58.089  38.542  0.00  0.00
ATOM   3508  CE1 TYR   208      76.640  57.934  40.280  0.00  0.00
ATOM   3509  HE1 TYR   208      77.340  58.365  40.927  0.00  0.00
ATOM   3510  CZ  TYR   208      75.417  57.553  40.783  0.00  0.00
ATOM   3511  OH  TYR   208      75.106  57.737  42.071  0.00  0.00
ATOM   3512  HH  TYR   208      75.794  58.131  42.544  0.00  0.00
ATOM   3513  CE2 TYR   208      74.493  56.996  39.931  0.00  0.00
ATOM   3514  HE2 TYR   208      73.565  56.683  40.320  0.00  0.00
ATOM   3515  CD2 TYR   208      74.774  56.859  38.575  0.00  0.00
ATOM   3516  HD2 TYR   208      74.044  56.467  37.933  0.00  0.00
ATOM   3517  C   TYR   208      76.192  54.609  36.608  0.00  0.00
ATOM   3518  O   TYR   208      76.606  53.928  37.534  0.00  0.00
ATOM   3519  N   THR   209      75.080  54.307  35.957  0.00  0.00
ATOM   3520  H   THR   209      74.804  54.908  35.214  0.00  0.00
ATOM   3521  CA  THR   209      74.203  53.194  36.327  0.00  0.00
ATOM   3522  HA  THR   209      74.029  53.236  37.396  0.00  0.00
ATOM   3523  CB  THR   209      72.844  53.311  35.629  0.00  0.00
ATOM   3524  HB  THR   209      72.960  53.146  34.575  0.00  0.00
ATOM   3525  CG2 THR   209      71.818  52.342  36.180  0.00  0.00
ATOM   3526 1HG2 THR   209      71.647  51.982  36.260  0.00  0.00
ATOM   3527 2HG2 THR   209      71.590  52.171  36.441  0.00  0.00
ATOM   3528 3HG2 THR   209      71.461  52.171  36.218  0.00  0.00
ATOM   3529  OG1 THR   209      72.315  54.584  35.837  0.00  0.00
ATOM   3530  HG1 THR   209      72.746  55.183  35.255  0.00  0.00
ATOM   3531  C   THR   209      74.845  51.842  36.033  0.00  0.00
ATOM   3532  O   THR   209      74.818  50.967  36.885  0.00  0.00
ATOM   3533  N   LEU   210      75.506  51.680  34.884  0.00  0.00
ATOM   3534  H   LEU   210      75.515  52.430  34.227  0.00  0.00
ATOM   3535  CA  LEU   210      76.263  50.474  34.556  0.00  0.00
ATOM   3536  HA  LEU   210      75.613  49.619  34.692  0.00  0.00
ATOM   3537  CB  LEU   210      76.691  50.510  33.084  0.00  0.00
ATOM   3538  HB2 LEU   210      77.185  51.445  32.892  0.00  0.00
ATOM   3539  HB3 LEU   210      77.407  49.721  32.925  0.00  0.00
ATOM   3540  CG  LEU   210      75.555  50.319  32.071  0.00  0.00
ATOM   3541  HG  LEU   210      74.792  51.040  32.243  0.00  0.00
ATOM   3542  CD1 LEU   210      76.080  50.488  30.673  0.00  0.00
ATOM   3543 1HD1 LEU   210      76.563  50.871  30.543  0.00  0.00
ATOM   3544 2HD1 LEU   210      76.321  50.001  30.296  0.00  0.00
ATOM   3545 3HD1 LEU   210      75.734  50.708  30.147  0.00  0.00
ATOM   3546  CD2 LEU   210      74.920  48.953  32.142  0.00  0.00
ATOM   3547 1HD2 LEU   210      74.562  48.704  32.007  0.00  0.00
ATOM   3548 2HD2 LEU   210      74.989  48.549  32.043  0.00  0.00
ATOM   3549 3HD2 LEU   210      74.732  48.623  32.421  0.00  0.00
ATOM   3550  C   LEU   210      77.462  50.252  35.480  0.00  0.00
ATOM   3551  O   LEU   210      77.757  49.122  35.802  0.00  0.00
ATOM   3552  N   GLU   211      78.133  51.296  35.952  0.00  0.00
ATOM   3553  H   GLU   211      77.902  52.199  35.606  0.00  0.00
ATOM   3554  CA  GLU   211      79.201  51.190  36.956  0.00  0.00
ATOM   3555  HA  GLU   211      79.904  50.441  36.620  0.00  0.00
ATOM   3556  CB  GLU   211      79.934  52.525  37.050  0.00  0.00
ATOM   3557  HB2 GLU   211      80.094  52.906  36.193  0.00  0.00
ATOM   3558  HB3 GLU   211      79.423  53.157  37.523  0.00  0.00
ATOM   3559  CG  GLU   211      81.152  52.535  37.641  0.00  0.00
ATOM   3560  HG2 GLU   211      81.244  52.869  38.115  0.00  0.00
ATOM   3561  HG3 GLU   211      81.229  51.999  37.879  0.00  0.00
ATOM   3562  CD  GLU   211      82.133  52.856  37.282  0.00  0.00
ATOM   3563  OE1 GLU   211      82.520  52.933  37.406  0.00  0.00
ATOM   3564  OE2 GLU   211      82.548  53.034  36.876  0.00  0.00
ATOM   3565  C   GLU   211      78.661  50.741  38.323  0.00  0.00
ATOM   3566  O   GLU   211      79.278  49.910  38.978  0.00  0.00
ATOM   3567  N   MET   212      77.490  51.229  38.737  0.00  0.00
ATOM   3568  H   MET   212      77.055  51.934  38.180  0.00  0.00
ATOM   3569  CA  MET   212      76.807  50.753  39.940  0.00  0.00
ATOM   3570  HA  MET   212      77.520  50.741  40.754  0.00  0.00
ATOM   3571  CB  MET   212      75.673  51.695  40.328  0.00  0.00
ATOM   3572  HB2 MET   212      75.060  51.892  39.477  0.00  0.00
ATOM   3573  HB3 MET   212      75.051  51.228  41.064  0.00  0.00
ATOM   3574  CG  MET   212      76.165  53.008  40.900  0.00  0.00
ATOM   3575  HG2 MET   212      76.748  53.241  40.645  0.00  0.00
ATOM   3576  HG3 MET   212      75.771  53.554  40.808  0.00  0.00
ATOM   3577  SD  MET   212      76.459  53.352  42.129  0.00  0.00
ATOM   3578  CE  MET   212      76.849  54.714  42.749  0.00  0.00
ATOM   3579  HE1 MET   212      76.887  54.980  42.768  0.00  0.00
ATOM   3580  HE2 MET   212      76.830  54.953  42.972  0.00  0.00
ATOM   3581  HE3 MET   212      77.068  55.022  42.902  0.00  0.00
ATOM   3582  C   MET   212      76.305  49.311  39.798  0.00  0.00
ATOM   3583  O   MET   212      76.383  48.544  40.751  0.00  0.00
ATOM   3584  N   ILE   213      75.839  48.892  38.627  0.00  0.00
ATOM   3585  H   ILE   213      75.756  49.562  37.895  0.00  0.00
ATOM   3586  CA  ILE   213      75.484  47.495  38.337  0.00  0.00
ATOM   3587  HA  ILE   213      74.849  47.132  39.137  0.00  0.00
ATOM   3588  CB  ILE   213      74.676  47.415  37.018  0.00  0.00
ATOM   3589  HB  ILE   213      75.189  47.995  36.269  0.00  0.00
ATOM   3590  CG2 ILE   213      74.545  45.989  36.496  0.00  0.00
ATOM   3591 1HG2 ILE   213      74.007  45.690  36.318  0.00  0.00
ATOM   3592 2HG2 ILE   213      74.806  45.773  35.956  0.00  0.00
ATOM   3593 3HG2 ILE   213      74.719  45.462  36.796  0.00  0.00
ATOM   3594  CG1 ILE   213      73.266  48.001  37.221  0.00  0.00
ATOM   3595 2HG1 ILE   213      72.688  47.324  37.819  0.00  0.00
ATOM   3596 3HG1 ILE   213      73.327  48.922  37.774  0.00  0.00
ATOM   3597  CD1 ILE   213      72.506  48.298  35.938  0.00  0.00
ATOM   3598 1HD1 ILE   213      72.512  48.524  35.555  0.00  0.00
ATOM   3599 2HD1 ILE   213      72.306  48.127  35.561  0.00  0.00
ATOM   3600 3HD1 ILE   213      72.129  48.463  35.766  0.00  0.00
ATOM   3601  C   ILE   213      76.720  46.584  38.352  0.00  0.00
ATOM   3602  O   ILE   213      76.633  45.463  38.813  0.00  0.00
ATOM   3603  N   LYS   214      77.895  47.051  37.941  0.00  0.00
ATOM   3604  H   LYS   214      77.920  47.955  37.525  0.00  0.00
ATOM   3605  CA  LYS   214      79.150  46.303  38.090  0.00  0.00
ATOM   3606  HA  LYS   214      78.989  45.310  37.695  0.00  0.00
ATOM   3607  CB  LYS   214      80.243  46.970  37.250  0.00  0.00
ATOM   3608  HB2 LYS   214      79.861  47.129  36.273  0.00  0.00
ATOM   3609  HB3 LYS   214      80.482  47.926  37.657  0.00  0.00
ATOM   3610  CG  LYS   214      81.517  46.153  37.135  0.00  0.00
ATOM   3611  HG2 LYS   214      81.975  46.077  38.078  0.00  0.00
ATOM   3612  HG3 LYS   214      81.280  45.181  36.824  0.00  0.00
ATOM   3613  CD  LYS   214      82.497  46.743  36.175  0.00  0.00
ATOM   3614  HD2 LYS   214      82.593  46.677  35.746  0.00  0.00
ATOM   3615  HD3 LYS   214      82.542  47.124  36.029  0.00  0.00
ATOM   3616  CE  LYS   214      83.273  46.878  35.999  0.00  0.00
ATOM   3617  HE2 LYS   214      83.339  46.777  36.176  0.00  0.00
ATOM   3618  HE3 LYS   214      83.089  46.686  35.941  0.00  0.00
ATOM   3619  NZ  LYS   214      84.166  47.357  35.664  0.00  0.00
ATOM   3620  HZ1 LYS   214      84.416  47.527  35.616  0.00  0.00
ATOM   3621  HZ2 LYS   214      84.435  47.455  35.596  0.00  0.00
ATOM   3622  HZ3 LYS   214      84.303  47.462  35.533  0.00  0.00
ATOM   3623  C   LYS   214      79.556  46.112  39.554  0.00  0.00
ATOM   3624  O   LYS   214      80.120  45.090  39.881  0.00  0.00
ATOM   3625  N   LEU   215      79.232  47.052  40.435  0.00  0.00
ATOM   3626  H   LEU   215      78.819  47.875  40.078  0.00  0.00
ATOM   3627  CA  LEU   215      79.421  46.937  41.881  0.00  0.00
ATOM   3628  HA  LEU   215      80.414  46.547  42.048  0.00  0.00
ATOM   3629  CB  LEU   215      79.345  48.334  42.499  0.00  0.00
ATOM   3630  HB2 LEU   215      80.006  48.987  41.968  0.00  0.00
ATOM   3631  HB3 LEU   215      78.361  48.717  42.368  0.00  0.00
ATOM   3632  CG  LEU   215      79.687  48.413  43.976  0.00  0.00
ATOM   3633  HG  LEU   215      79.092  47.729  44.509  0.00  0.00
ATOM   3634  CD1 LEU   215      81.110  48.114  44.249  0.00  0.00
ATOM   3635 1HD1 LEU   215      81.457  48.199  44.431  0.00  0.00
ATOM   3636 2HD1 LEU   215      81.398  47.871  44.391  0.00  0.00
ATOM   3637 3HD1 LEU   215      81.514  48.048  44.149  0.00  0.00
ATOM   3638  CD2 LEU   215      79.394  49.762  44.504  0.00  0.00
ATOM   3639 1HD2 LEU   215      79.267  50.111  44.591  0.00  0.00
ATOM   3640 2HD2 LEU   215      79.303  50.050  44.704  0.00  0.00
ATOM   3641 3HD2 LEU   215      79.380  50.114  44.614  0.00  0.00
ATOM   3642  C   LEU   215      78.432  45.969  42.544  0.00  0.00
ATOM   3643  O   LEU   215      78.834  45.166  43.366  0.00  0.00
ATOM   3644  N   VAL   216      77.157  46.019  42.182  0.00  0.00
ATOM   3645  H   VAL   216      76.913  46.718  41.516  0.00  0.00
ATOM   3646  CA  VAL   216      76.093  45.156  42.724  0.00  0.00
ATOM   3647  HA  VAL   216      76.547  44.303  43.212  0.00  0.00
ATOM   3648  CB  VAL   216      75.254  45.861  43.819  0.00  0.00
ATOM   3649  HB  VAL   216      74.741  46.700  43.387  0.00  0.00
ATOM   3650  CG1 VAL   216      74.248  44.926  44.463  0.00  0.00
ATOM   3651 1HG1 VAL   216      74.114  44.354  44.303  0.00  0.00
ATOM   3652 2HG1 VAL   216      74.257  44.735  45.045  0.00  0.00
ATOM   3653 3HG1 VAL   216      73.628  44.998  44.546  0.00  0.00
ATOM   3654  CG2 VAL   216      76.137  46.379  44.936  0.00  0.00
ATOM   3655 1HG2 VAL   216      76.574  46.728  44.915  0.00  0.00
ATOM   3656 2HG2 VAL   216      76.027  46.690  45.416  0.00  0.00
ATOM   3657 3HG2 VAL   216      76.465  46.108  45.303  0.00  0.00
ATOM   3658  C   VAL   216      75.208  44.612  41.587  0.00  0.00
ATOM   3659  O   VAL   216      74.183  45.214  41.271  0.00  0.00
ATOM   3660  N   PRO   217      75.615  43.504  40.937  0.00  0.00
ATOM   3661  CD  PRO   217      76.900  42.868  41.108  0.00  0.00
ATOM   3662  HD2 PRO   217      76.940  42.399  42.063  0.00  0.00
ATOM   3663  HD3 PRO   217      77.695  43.569  41.007  0.00  0.00
ATOM   3664  CG  PRO   217      77.034  41.809  40.040  0.00  0.00
ATOM   3665  HG2 PRO   217      77.524  40.940  40.403  0.00  0.00
ATOM   3666  HG3 PRO   217      77.553  42.197  39.208  0.00  0.00
ATOM   3667  CB  PRO   217      75.615  41.514  39.666  0.00  0.00
ATOM   3668  HB2 PRO   217      75.212  40.811  40.359  0.00  0.00
ATOM   3669  HB3 PRO   217      75.544  41.113  38.680  0.00  0.00
ATOM   3670  CA  PRO   217      74.924  42.867  39.813  0.00  0.00
ATOM   3671  HA  PRO   217      75.129  43.465  38.935  0.00  0.00
ATOM   3672  C   PRO   217      73.408  42.694  39.903  0.00  0.00
ATOM   3673  O   PRO   217      72.732  42.845  38.891  0.00  0.00
ATOM   3674  N   HIE   218      72.866  42.354  41.069  0.00  0.00
ATOM   3675  H   HIE   218      73.481  42.217  41.844  0.00  0.00
ATOM   3676  CA  HIE   218      71.476  41.911  41.245  0.00  0.00
ATOM   3677  HA  HIE   218      71.069  41.642  40.282  0.00  0.00
ATOM   3678  CB  HIE   218      71.490  40.641  42.102  0.00  0.00
ATOM   3679  HB2 HIE   218      72.417  40.140  41.961  0.00  0.00
ATOM   3680  HB3 HIE   218      71.433  40.906  43.130  0.00  0.00
ATOM   3681  CG  HIE   218      70.420  39.656  41.808  0.00  0.00
ATOM   3682  ND1 HIE   218      70.477  38.699  40.884  0.00  0.00
ATOM   3683  CE1 HIE   218      69.336  38.049  40.933  0.00  0.00
ATOM   3684  HE1 HIE   218      69.062  37.250  40.340  0.00  0.00
ATOM   3685  NE2 HIE   218      68.581  38.530  41.841  0.00  0.00
ATOM   3686  HE2 HIE   218      67.666  38.237  42.020  0.00  0.00
ATOM   3687  CD2 HIE   218      69.253  39.534  42.404  0.00  0.00
ATOM   3688  HD2 HIE   218      68.923  40.144  43.155  0.00  0.00
ATOM   3689  C   HIE   218      70.539  43.004  41.790  0.00  0.00
ATOM   3690  O   HIE   218      69.443  42.718  42.208  0.00  0.00
ATOM   3691  N   ASN   219      70.966  44.255  41.798  0.00  0.00
ATOM   3692  H   ASN   219      71.872  44.415  41.433  0.00  0.00
ATOM   3693  CA  ASN   219      70.208  45.402  42.293  0.00  0.00
ATOM   3694  HA  ASN   219      69.829  45.156  43.275  0.00  0.00
ATOM   3695  CB  ASN   219      71.192  46.558  42.435  0.00  0.00
ATOM   3696  HB2 ASN   219      71.997  46.256  43.080  0.00  0.00
ATOM   3697  HB3 ASN   219      71.599  46.771  41.463  0.00  0.00
ATOM   3698  CG  ASN   219      70.604  47.825  43.005  0.00  0.00
ATOM   3699  OD1 ASN   219      69.469  47.920  43.379  0.00  0.00
ATOM   3700  ND2 ASN   219      71.377  48.845  43.095  0.00  0.00
ATOM   3701 1HD2 ASN   219      71.055  49.688  43.506  0.00  0.00
ATOM   3702 2HD2 ASN   219      72.285  48.774  42.695  0.00  0.00
ATOM   3703  C   ASN   219      69.019  45.777  41.388  0.00  0.00
ATOM   3704  O   ASN   219      69.200  46.425  40.369  0.00  0.00
ATOM   3705  N   GLU   220      67.807  45.418  41.780  0.00  0.00
ATOM   3706  H   GLU   220      67.731  44.873  42.598  0.00  0.00
ATOM   3707  CA  GLU   220      66.589  45.641  40.994  0.00  0.00
ATOM   3708  HA  GLU   220      66.692  45.127  40.057  0.00  0.00
ATOM   3709  CB  GLU   220      65.393  45.043  41.709  0.00  0.00
ATOM   3710  HB2 GLU   220      65.242  44.976  41.930  0.00  0.00
ATOM   3711  HB3 GLU   220      65.064  45.007  41.794  0.00  0.00
ATOM   3712  CG  GLU   220      64.816  44.578  41.968  0.00  0.00
ATOM   3713  HG2 GLU   220      64.906  44.664  41.777  0.00  0.00
ATOM   3714  HG3 GLU   220      65.131  44.634  41.846  0.00  0.00
ATOM   3715  CD  GLU   220      63.679  43.926  42.638  0.00  0.00
ATOM   3716  OE1 GLU   220      63.267  43.667  42.961  0.00  0.00
ATOM   3717  OE2 GLU   220      63.164  43.679  42.847  0.00  0.00
ATOM   3718  C   GLU   220      66.334  47.116  40.658  0.00  0.00
ATOM   3719  O   GLU   220      65.965  47.426  39.534  0.00  0.00
ATOM   3720  N   SER   221      66.570  48.037  41.594  0.00  0.00
ATOM   3721  H   SER   221      66.869  47.731  42.488  0.00  0.00
ATOM   3722  CA  SER   221      66.364  49.473  41.381  0.00  0.00
ATOM   3723  HA  SER   221      65.349  49.635  41.050  0.00  0.00
ATOM   3724  CB  SER   221      66.570  50.247  42.675  0.00  0.00
ATOM   3725  HB2 SER   221      67.569  50.103  43.044  0.00  0.00
ATOM   3726  HB3 SER   221      66.413  51.292  42.470  0.00  0.00
ATOM   3727  OG  SER   221      65.657  49.811  43.634  0.00  0.00
ATOM   3728  HG  SER   221      64.822  50.188  43.442  0.00  0.00
ATOM   3729  C   SER   221      67.276  50.056  40.313  0.00  0.00
ATOM   3730  O   SER   221      66.810  50.820  39.493  0.00  0.00
ATOM   3731  N   ALA   222      68.544  49.663  40.248  0.00  0.00
ATOM   3732  H   ALA   222      68.870  49.007  40.918  0.00  0.00
ATOM   3733  CA  ALA   222      69.469  50.135  39.225  0.00  0.00
ATOM   3734  HA  ALA   222      69.441  51.215  39.210  0.00  0.00
ATOM   3735  CB  ALA   222      70.882  49.712  39.597  0.00  0.00
ATOM   3736  HB1 ALA   222      71.046  49.012  39.711  0.00  0.00
ATOM   3737  HB2 ALA   222      71.426  49.862  39.140  0.00  0.00
ATOM   3738  HB3 ALA   222      71.194  49.974  40.197  0.00  0.00
ATOM   3739  C   ALA   222      69.076  49.653  37.818  0.00  0.00
ATOM   3740  O   ALA   222      69.115  50.421  36.868  0.00  0.00
ATOM   3741  N   TRP   223      68.632  48.406  37.681  0.00  0.00
ATOM   3742  H   TRP   223      68.638  47.811  38.477  0.00  0.00
ATOM   3743  CA  TRP   223      68.111  47.863  36.421  0.00  0.00
ATOM   3744  HA  TRP   223      68.818  48.079  35.629  0.00  0.00
ATOM   3745  CB  TRP   223      67.986  46.345  36.533  0.00  0.00
ATOM   3746  HB2 TRP   223      67.515  46.086  37.469  0.00  0.00
ATOM   3747  HB3 TRP   223      67.330  45.995  35.752  0.00  0.00
ATOM   3748  CG  TRP   223      69.271  45.601  36.384  0.00  0.00
ATOM   3749  CD1 TRP   223      69.950  44.976  37.356  0.00  0.00
ATOM   3750  HD1 TRP   223      69.637  44.930  38.377  0.00  0.00
ATOM   3751  NE1 TRP   223      71.084  44.400  36.838  0.00  0.00
ATOM   3752  HE1 TRP   223      71.737  43.897  37.403  0.00  0.00
ATOM   3753  CE2 TRP   223      71.189  44.625  35.487  0.00  0.00
ATOM   3754  CZ2 TRP   223      72.136  44.282  34.517  0.00  0.00
ATOM   3755  HZ2 TRP   223      73.011  43.727  34.778  0.00  0.00
ATOM   3756  CH2 TRP   223      71.960  44.712  33.202  0.00  0.00
ATOM   3757  HH2 TRP   223      72.679  44.480  32.447  0.00  0.00
ATOM   3758  CZ3 TRP   223      70.819  45.430  32.862  0.00  0.00
ATOM   3759  HZ3 TRP   223      70.672  45.725  31.847  0.00  0.00
ATOM   3760  CE3 TRP   223      69.870  45.773  33.837  0.00  0.00
ATOM   3761  HE3 TRP   223      69.004  46.332  33.566  0.00  0.00
ATOM   3762  CD2 TRP   223      70.034  45.385  35.170  0.00  0.00
ATOM   3763  C   TRP   223      66.789  48.500  35.980  0.00  0.00
ATOM   3764  O   TRP   223      66.602  48.734  34.796  0.00  0.00
ATOM   3765  N   ASN   224      65.905  48.846  36.903  0.00  0.00
ATOM   3766  H   ASN   224      66.092  48.587  37.844  0.00  0.00
ATOM   3767  CA  ASN   224      64.702  49.609  36.611  0.00  0.00
ATOM   3768  HA  ASN   224      64.199  49.180  35.754  0.00  0.00
ATOM   3769  CB  ASN   224      63.749  49.557  37.809  0.00  0.00
ATOM   3770  HB2 ASN   224      64.283  49.687  38.734  0.00  0.00
ATOM   3771  HB3 ASN   224      63.045  50.370  37.725  0.00  0.00
ATOM   3772  CG  ASN   224      62.952  48.278  37.854  0.00  0.00
ATOM   3773  OD1 ASN   224      62.068  48.065  37.255  0.00  0.00
ATOM   3774  ND2 ASN   224      63.220  47.402  38.528  0.00  0.00
ATOM   3775 1HD2 ASN   224      62.714  46.559  38.536  0.00  0.00
ATOM   3776 2HD2 ASN   224      63.961  47.560  38.998  0.00  0.00
ATOM   3777  C   ASN   224      65.037  51.056  36.212  0.00  0.00
ATOM   3778  O   ASN   224      64.434  51.574  35.290  0.00  0.00
ATOM   3779  N   TYR   225      66.023  51.701  36.845  0.00  0.00
ATOM   3780  H   TYR   225      66.465  51.258  37.625  0.00  0.00
ATOM   3781  CA  TYR   225      66.443  53.064  36.518  0.00  0.00
ATOM   3782  HA  TYR   225      65.566  53.699  36.497  0.00  0.00
ATOM   3783  CB  TYR   225      67.394  53.607  37.585  0.00  0.00
ATOM   3784  HB2 TYR   225      66.916  53.557  38.547  0.00  0.00
ATOM   3785  HB3 TYR   225      68.266  52.976  37.630  0.00  0.00
ATOM   3786  CG  TYR   225      67.827  55.038  37.355  0.00  0.00
ATOM   3787  CD1 TYR   225      66.995  56.090  37.735  0.00  0.00
ATOM   3788  HD1 TYR   225      66.051  55.877  38.182  0.00  0.00
ATOM   3789  CE1 TYR   225      67.393  57.414  37.521  0.00  0.00
ATOM   3790  HE1 TYR   225      66.771  58.231  37.786  0.00  0.00
ATOM   3791  CZ  TYR   225      68.630  57.697  36.933  0.00  0.00
ATOM   3792  OH  TYR   225      69.005  58.983  36.763  0.00  0.00
ATOM   3793  HH  TYR   225      69.904  59.084  36.490  0.00  0.00
ATOM   3794  CE2 TYR   225      69.470  56.648  36.573  0.00  0.00
ATOM   3795  HE2 TYR   225      70.417  56.859  36.134  0.00  0.00
ATOM   3796  CD2 TYR   225      69.061  55.320  36.780  0.00  0.00
ATOM   3797  HD2 TYR   225      69.698  54.514  36.501  0.00  0.00
ATOM   3798  C   TYR   225      67.070  53.153  35.130  0.00  0.00
ATOM   3799  O   TYR   225      66.732  54.052  34.378  0.00  0.00
ATOM   3800  N   LEU   226      67.891  52.173  34.747  0.00  0.00
ATOM   3801  H   LEU   226      68.161  51.499  35.432  0.00  0.00
ATOM   3802  CA  LEU   226      68.469  52.058  33.406  0.00  0.00
ATOM   3803  HA  LEU   226      69.081  52.934  33.233  0.00  0.00
ATOM   3804  CB  LEU   226      69.355  50.803  33.357  0.00  0.00
ATOM   3805  HB2 LEU   226      70.050  50.830  34.175  0.00  0.00
ATOM   3806  HB3 LEU   226      68.732  49.939  33.501  0.00  0.00
ATOM   3807  CG  LEU   226      70.160  50.599  32.074  0.00  0.00
ATOM   3808  HG  LEU   226      69.499  50.566  31.242  0.00  0.00
ATOM   3809  CD1 LEU   226      71.164  51.690  31.849  0.00  0.00
ATOM   3810 1HD1 LEU   226      71.416  51.988  31.908  0.00  0.00
ATOM   3811 2HD1 LEU   226      71.500  51.874  31.747  0.00  0.00
ATOM   3812 3HD1 LEU   226      71.322  51.998  31.704  0.00  0.00
ATOM   3813  CD2 LEU   226      70.903  49.292  32.124  0.00  0.00
ATOM   3814 1HD2 LEU   226      71.326  49.142  32.402  0.00  0.00
ATOM   3815 2HD2 LEU   226      70.736  48.798  32.251  0.00  0.00
ATOM   3816 3HD2 LEU   226      71.173  48.979  31.742  0.00  0.00
ATOM   3817  C   LEU   226      67.392  52.043  32.310  0.00  0.00
ATOM   3818  O   LEU   226      67.501  52.741  31.330  0.00  0.00
ATOM   3819  N   LYS   227      66.314  51.298  32.495  0.00  0.00
ATOM   3820  H   LYS   227      66.285  50.738  33.310  0.00  0.00
ATOM   3821  CA  LYS   227      65.148  51.327  31.597  0.00  0.00
ATOM   3822  HA  LYS   227      65.503  51.251  30.581  0.00  0.00
ATOM   3823  CB  LYS   227      64.256  50.123  31.890  0.00  0.00
ATOM   3824  HB2 LYS   227      64.836  49.234  31.840  0.00  0.00
ATOM   3825  HB3 LYS   227      63.855  50.198  32.865  0.00  0.00
ATOM   3826  CG  LYS   227      63.111  49.994  30.922  0.00  0.00
ATOM   3827  HG2 LYS   227      62.491  50.629  31.044  0.00  0.00
ATOM   3828  HG3 LYS   227      63.413  50.081  30.095  0.00  0.00
ATOM   3829  CD  LYS   227      62.408  48.854  30.920  0.00  0.00
ATOM   3830  HD2 LYS   227      62.944  48.283  30.718  0.00  0.00
ATOM   3831  HD3 LYS   227      62.196  48.680  31.698  0.00  0.00
ATOM   3832  CE  LYS   227      61.250  48.734  30.131  0.00  0.00
ATOM   3833  HE2 LYS   227      60.690  49.399  30.339  0.00  0.00
ATOM   3834  HE3 LYS   227      61.498  48.883  29.292  0.00  0.00
ATOM   3835  NZ  LYS   227      60.565  47.570  30.191  0.00  0.00
ATOM   3836  HZ1 LYS   227      60.435  47.196  30.218  0.00  0.00
ATOM   3837  HZ2 LYS   227      60.335  47.277  30.231  0.00  0.00
ATOM   3838  HZ3 LYS   227      60.428  47.378  30.156  0.00  0.00
ATOM   3839  C   LYS   227      64.390  52.649  31.690  0.00  0.00
ATOM   3840  O   LYS   227      64.043  53.231  30.677  0.00  0.00
ATOM   3841  N   GLY   228      64.193  53.156  32.898  0.00  0.00
ATOM   3842  H   GLY   228      64.482  52.595  33.670  0.00  0.00
ATOM   3843  CA  GLY   228      63.532  54.415  33.218  0.00  0.00
ATOM   3844  HA2 GLY   228      62.492  54.332  32.985  0.00  0.00
ATOM   3845  HA3 GLY   228      63.631  54.569  34.274  0.00  0.00
ATOM   3846  C   GLY   228      64.077  55.667  32.530  0.00  0.00
ATOM   3847  O   GLY   228      63.315  56.562  32.245  0.00  0.00
ATOM   3848  N   ILE   229      65.366  55.728  32.229  0.00  0.00
ATOM   3849  H   ILE   229      65.946  54.995  32.575  0.00  0.00
ATOM   3850  CA  ILE   229      66.011  56.807  31.464  0.00  0.00
ATOM   3851  HA  ILE   229      65.392  57.688  31.545  0.00  0.00
ATOM   3852  CB  ILE   229      67.379  57.179  32.062  0.00  0.00
ATOM   3853  HB  ILE   229      67.765  58.004  31.484  0.00  0.00
ATOM   3854  CG2 ILE   229      67.220  57.690  33.492  0.00  0.00
ATOM   3855 1HG2 ILE   229      67.204  57.564  33.935  0.00  0.00
ATOM   3856 2HG2 ILE   229      67.405  57.967  33.830  0.00  0.00
ATOM   3857 3HG2 ILE   229      66.945  57.925  33.775  0.00  0.00
ATOM   3858  CG1 ILE   229      68.391  56.029  31.973  0.00  0.00
ATOM   3859 2HG1 ILE   229      68.029  55.204  32.525  0.00  0.00
ATOM   3860 3HG1 ILE   229      68.480  55.723  30.965  0.00  0.00
ATOM   3861  CD1 ILE   229      69.778  56.303  32.465  0.00  0.00
ATOM   3862 1HD1 ILE   229      70.172  56.223  32.594  0.00  0.00
ATOM   3863 2HD1 ILE   229      70.133  56.436  32.441  0.00  0.00
ATOM   3864 3HD1 ILE   229      70.053  56.439  32.705  0.00  0.00
ATOM   3865  C   ILE   229      66.110  56.531  29.955  0.00  0.00
ATOM   3866  O   ILE   229      66.374  57.415  29.198  0.00  0.00
ATOM   3867  N   LEU   230      65.877  55.336  29.484  0.00  0.00
ATOM   3868  H   LEU   230      65.658  54.651  30.145  0.00  0.00
ATOM   3869  CA  LEU   230      66.013  54.937  28.078  0.00  0.00
ATOM   3870  HA  LEU   230      66.563  55.694  27.538  0.00  0.00
ATOM   3871  CB  LEU   230      66.807  53.635  28.014  0.00  0.00
ATOM   3872  HB2 LEU   230      66.491  53.008  28.708  0.00  0.00
ATOM   3873  HB3 LEU   230      66.622  53.190  27.161  0.00  0.00
ATOM   3874  CG  LEU   230      68.238  53.688  28.111  0.00  0.00
ATOM   3875  HG  LEU   230      68.335  54.173  28.838  0.00  0.00
ATOM   3876  CD1 LEU   230      68.891  52.547  28.206  0.00  0.00
ATOM   3877 1HD1 LEU   230      69.034  52.295  27.981  0.00  0.00
ATOM   3878 2HD1 LEU   230      69.269  52.354  28.410  0.00  0.00
ATOM   3879 3HD1 LEU   230      68.853  52.158  28.310  0.00  0.00
ATOM   3880  CD2 LEU   230      68.923  54.163  27.109  0.00  0.00
ATOM   3881 1HD2 LEU   230      69.182  54.151  26.775  0.00  0.00
ATOM   3882 2HD2 LEU   230      69.023  54.375  26.842  0.00  0.00
ATOM   3883 3HD2 LEU   230      69.083  54.332  27.016  0.00  0.00
ATOM   3884  C   LEU   230      64.690  54.780  27.338  0.00  0.00
ATOM   3885  O   LEU   230      64.650  54.941  26.138  0.00  0.00
ATOM   3886  N   GLN   231      63.597  54.501  28.019  0.00  0.00
ATOM   3887  H   GLN   231      63.703  54.330  28.990  0.00  0.00
ATOM   3888  CA  GLN   231      62.281  54.234  27.434  0.00  0.00
ATOM   3889  HA  GLN   231      62.420  53.560  26.619  0.00  0.00
ATOM   3890  CB  GLN   231      61.423  53.498  28.449  0.00  0.00
ATOM   3891  HB2 GLN   231      60.544  53.156  27.950  0.00  0.00
ATOM   3892  HB3 GLN   231      61.946  52.636  28.798  0.00  0.00
ATOM   3893  CG  GLN   231      61.010  54.313  29.639  0.00  0.00
ATOM   3894  HG2 GLN   231      61.841  54.662  30.139  0.00  0.00
ATOM   3895  HG3 GLN   231      60.467  55.121  29.330  0.00  0.00
ATOM   3896  CD  GLN   231      60.209  53.601  30.613  0.00  0.00
ATOM   3897  OE1 GLN   231      59.956  52.640  30.582  0.00  0.00
ATOM   3898  NE2 GLN   231      59.771  54.048  31.517  0.00  0.00
ATOM   3899 1HE2 GLN   231      59.243  53.604  32.158  0.00  0.00
ATOM   3900 2HE2 GLN   231      59.958  54.837  31.549  0.00  0.00
ATOM   3901  C   GLN   231      61.537  55.434  26.831  0.00  0.00
ATOM   3902  O   GLN   231      60.413  55.304  26.437  0.00  0.00
ATOM   3903  N   ASP   232      62.128  56.601  26.774  0.00  0.00
ATOM   3904  H   ASP   232      63.056  56.624  27.070  0.00  0.00
ATOM   3905  CA  ASP   232      61.505  57.864  26.374  0.00  0.00
ATOM   3906  HA  ASP   232      60.788  58.133  27.118  0.00  0.00
ATOM   3907  CB  ASP   232      62.582  58.926  26.372  0.00  0.00
ATOM   3908  HB2 ASP   232      63.023  58.975  27.335  0.00  0.00
ATOM   3909  HB3 ASP   232      63.345  58.641  25.700  0.00  0.00
ATOM   3910  CG  ASP   232      62.073  60.274  26.001  0.00  0.00
ATOM   3911  OD1 ASP   232      62.444  60.783  25.020  0.00  0.00
ATOM   3912  OD2 ASP   232      61.337  60.842  26.709  0.00  0.00
ATOM   3913  C   ASP   232      60.762  57.848  25.032  0.00  0.00
ATOM   3914  O   ASP   232      59.694  58.406  24.928  0.00  0.00
ATOM   3915  N   ARG   233      61.299  57.187  24.032  0.00  0.00
ATOM   3916  H   ARG   233      62.201  56.827  24.205  0.00  0.00
ATOM   3917  CA  ARG   233      60.668  56.936  22.738  0.00  0.00
ATOM   3918  HA  ARG   233      59.617  56.891  22.885  0.00  0.00
ATOM   3919  CB  ARG   233      60.944  58.095  21.809  0.00  0.00
ATOM   3920  HB2 ARG   233      60.712  58.117  21.334  0.00  0.00
ATOM   3921  HB3 ARG   233      60.779  58.588  21.939  0.00  0.00
ATOM   3922  CG  ARG   233      61.687  58.577  21.336  0.00  0.00
ATOM   3923  HG2 ARG   233      61.941  58.513  21.802  0.00  0.00
ATOM   3924  HG3 ARG   233      61.851  58.158  21.077  0.00  0.00
ATOM   3925  CD  ARG   233      61.868  59.762  20.558  0.00  0.00
ATOM   3926  HD2 ARG   233      62.492  59.642  19.961  0.00  0.00
ATOM   3927  HD3 ARG   233      61.152  59.999  20.084  0.00  0.00
ATOM   3928  NE  ARG   233      62.159  60.736  21.196  0.00  0.00
ATOM   3929  HE  ARG   233      62.232  60.608  22.040  0.00  0.00
ATOM   3930  CZ  ARG   233      62.366  61.772  20.802  0.00  0.00
ATOM   3931  NH1 ARG   233      62.317  62.108  19.745  0.00  0.00
ATOM   3932 1HH1 ARG   233      62.093  61.570  19.166  0.00  0.00
ATOM   3933 2HH1 ARG   233      62.459  62.916  19.502  0.00  0.00
ATOM   3934  NH2 ARG   233      62.645  62.503  21.492  0.00  0.00
ATOM   3935 1HH2 ARG   233      62.677  62.247  22.300  0.00  0.00
ATOM   3936 2HH2 ARG   233      62.790  63.300  21.226  0.00  0.00
ATOM   3937  C   ARG   233      61.014  55.599  22.106  0.00  0.00
ATOM   3938  O   ARG   233      60.487  55.229  21.215  0.00  0.00
ATOM   3939  N   GLY   234      61.868  54.865  22.575  0.00  0.00
ATOM   3940  H   GLY   234      62.261  55.238  23.280  0.00  0.00
ATOM   3941  CA  GLY   234      62.296  53.553  22.140  0.00  0.00
ATOM   3942  HA2 GLY   234      61.704  52.829  22.632  0.00  0.00
ATOM   3943  HA3 GLY   234      62.126  53.447  21.106  0.00  0.00
ATOM   3944  C   GLY   234      63.761  53.272  22.416  0.00  0.00
ATOM   3945  O   GLY   234      64.569  54.142  22.451  0.00  0.00
ATOM   3946  N   LEU   235      64.121  52.046  22.623  0.00  0.00
ATOM   3947  H   LEU   235      63.420  51.384  22.528  0.00  0.00
ATOM   3948  CA  LEU   235      65.473  51.617  22.990  0.00  0.00
ATOM   3949  HA  LEU   235      65.924  52.364  23.625  0.00  0.00
ATOM   3950  CB  LEU   235      65.380  50.303  23.783  0.00  0.00
ATOM   3951  HB2 LEU   235      64.914  49.570  23.184  0.00  0.00
ATOM   3952  HB3 LEU   235      66.360  49.963  23.978  0.00  0.00
ATOM   3953  CG  LEU   235      64.646  50.364  25.082  0.00  0.00
ATOM   3954  HG  LEU   235      63.992  50.785  24.956  0.00  0.00
ATOM   3955  CD1 LEU   235      64.277  49.329  25.649  0.00  0.00
ATOM   3956 1HD1 LEU   235      64.010  48.931  25.584  0.00  0.00
ATOM   3957 2HD1 LEU   235      64.502  49.100  25.791  0.00  0.00
ATOM   3958 3HD1 LEU   235      64.029  49.196  25.995  0.00  0.00
ATOM   3959  CD2 LEU   235      65.138  50.842  26.059  0.00  0.00
ATOM   3960 1HD2 LEU   235      65.279  50.822  26.461  0.00  0.00
ATOM   3961 2HD2 LEU   235      65.355  50.996  26.086  0.00  0.00
ATOM   3962 3HD2 LEU   235      65.143  51.064  26.349  0.00  0.00
ATOM   3963  C   LEU   235      66.390  51.482  21.774  0.00  0.00
ATOM   3964  O   LEU   235      67.583  51.666  21.894  0.00  0.00
ATOM   3965  N   SER   236      65.850  51.211  20.593  0.00  0.00
ATOM   3966  H   SER   236      64.866  51.040  20.578  0.00  0.00
ATOM   3967  CA  SER   236      66.589  51.022  19.346  0.00  0.00
ATOM   3968  HA  SER   236      67.253  50.191  19.473  0.00  0.00
ATOM   3969  CB  SER   236      65.638  50.691  18.216  0.00  0.00
ATOM   3970  HB2 SER   236      64.962  51.497  18.052  0.00  0.00
ATOM   3971  HB3 SER   236      66.194  50.542  17.319  0.00  0.00
ATOM   3972  OG  SER   236      64.911  49.542  18.478  0.00  0.00
ATOM   3973  HG  SER   236      64.288  49.711  19.155  0.00  0.00
ATOM   3974  C   SER   236      67.442  52.210  18.913  0.00  0.00
ATOM   3975  O   SER   236      68.375  52.041  18.157  0.00  0.00
ATOM   3976  N   ARG   237      67.150  53.410  19.390  0.00  0.00
ATOM   3977  H   ARG   237      66.366  53.462  19.985  0.00  0.00
ATOM   3978  CA  ARG   237      67.879  54.652  19.117  0.00  0.00
ATOM   3979  HA  ARG   237      68.029  54.709  18.065  0.00  0.00
ATOM   3980  CB  ARG   237      67.016  55.825  19.502  0.00  0.00
ATOM   3981  HB2 ARG   237      66.979  56.280  19.199  0.00  0.00
ATOM   3982  HB3 ARG   237      66.519  55.738  19.509  0.00  0.00
ATOM   3983  CG  ARG   237      66.858  56.537  20.245  0.00  0.00
ATOM   3984  HG2 ARG   237      66.978  56.098  20.649  0.00  0.00
ATOM   3985  HG3 ARG   237      67.382  56.753  20.185  0.00  0.00
ATOM   3986  CD  ARG   237      65.802  57.543  20.563  0.00  0.00
ATOM   3987  HD2 ARG   237      64.946  57.294  20.127  0.00  0.00
ATOM   3988  HD3 ARG   237      65.627  57.537  21.538  0.00  0.00
ATOM   3989  NE  ARG   237      66.124  58.825  20.227  0.00  0.00
ATOM   3990  HE  ARG   237      66.612  59.280  20.816  0.00  0.00
ATOM   3991  CZ  ARG   237      65.836  59.442  19.250  0.00  0.00
ATOM   3992  NH1 ARG   237      66.218  60.540  19.099  0.00  0.00
ATOM   3993 1HH1 ARG   237      66.684  60.925  19.730  0.00  0.00
ATOM   3994 2HH1 ARG   237      66.018  60.987  18.354  0.00  0.00
ATOM   3995  NH2 ARG   237      65.194  59.000  18.403  0.00  0.00
ATOM   3996 1HH2 ARG   237      64.868  58.156  18.458  0.00  0.00
ATOM   3997 2HH2 ARG   237      65.016  59.522  17.684  0.00  0.00
ATOM   3998  C   ARG   237      69.273  54.739  19.727  0.00  0.00
ATOM   3999  O   ARG   237      70.015  55.637  19.392  0.00  0.00
ATOM   4000  N   TYR   238      69.648  53.799  20.582  0.00  0.00
ATOM   4001  H   TYR   238      68.993  53.091  20.807  0.00  0.00
ATOM   4002  CA  TYR   238      70.911  53.779  21.307  0.00  0.00
ATOM   4003  HA  TYR   238      71.568  54.531  20.910  0.00  0.00
ATOM   4004  CB  TYR   238      70.636  54.164  22.757  0.00  0.00
ATOM   4005  HB2 TYR   238      70.049  53.393  23.207  0.00  0.00
ATOM   4006  HB3 TYR   238      71.567  54.196  23.279  0.00  0.00
ATOM   4007  CG  TYR   238      69.944  55.497  22.963  0.00  0.00
ATOM   4008  CD1 TYR   238      68.686  55.555  23.557  0.00  0.00
ATOM   4009  HD1 TYR   238      68.203  54.662  23.864  0.00  0.00
ATOM   4010  CE1 TYR   238      68.047  56.780  23.750  0.00  0.00
ATOM   4011  HE1 TYR   238      67.096  56.825  24.214  0.00  0.00
ATOM   4012  CZ  TYR   238      68.654  57.962  23.328  0.00  0.00
ATOM   4013  OH  TYR   238      68.049  59.150  23.482  0.00  0.00
ATOM   4014  HH  TYR   238      67.228  59.072  23.916  0.00  0.00
ATOM   4015  CE2 TYR   238      69.907  57.896  22.728  0.00  0.00
ATOM   4016  HE2 TYR   238      70.367  58.795  22.416  0.00  0.00
ATOM   4017  CD2 TYR   238      70.559  56.673  22.571  0.00  0.00
ATOM   4018  HD2 TYR   238      71.520  56.650  22.125  0.00  0.00
ATOM   4019  C   TYR   238      71.661  52.442  21.163  0.00  0.00
ATOM   4020  O   TYR   238      71.949  51.781  22.148  0.00  0.00
ATOM   4021  N   PRO   239      71.990  51.990  19.943  0.00  0.00
ATOM   4022  CD  PRO   239      71.868  52.686  18.689  0.00  0.00
ATOM   4023  HD2 PRO   239      72.332  53.626  18.720  0.00  0.00
ATOM   4024  HD3 PRO   239      70.857  52.807  18.436  0.00  0.00
ATOM   4025  CG  PRO   239      72.517  51.836  17.668  0.00  0.00
ATOM   4026  HG2 PRO   239      73.424  52.147  17.511  0.00  0.00
ATOM   4027  HG3 PRO   239      72.007  51.840  16.836  0.00  0.00
ATOM   4028  CB  PRO   239      72.576  50.506  18.205  0.00  0.00
ATOM   4029  HB2 PRO   239      73.410  50.047  17.903  0.00  0.00
ATOM   4030  HB3 PRO   239      71.786  50.003  17.867  0.00  0.00
ATOM   4031  CA  PRO   239      72.517  50.655  19.704  0.00  0.00
ATOM   4032  HA  PRO   239      71.815  49.943  20.085  0.00  0.00
ATOM   4033  C   PRO   239      73.870  50.334  20.343  0.00  0.00
ATOM   4034  O   PRO   239      74.173  49.173  20.555  0.00  0.00
ATOM   4035  N   ASN   240      74.670  51.335  20.695  0.00  0.00
ATOM   4036  H   ASN   240      74.362  52.263  20.518  0.00  0.00
ATOM   4037  CA  ASN   240      75.918  51.141  21.431  0.00  0.00
ATOM   4038  HA  ASN   240      76.544  50.487  20.858  0.00  0.00
ATOM   4039  CB  ASN   240      76.636  52.470  21.549  0.00  0.00
ATOM   4040  HB2 ASN   240      76.699  52.935  20.591  0.00  0.00
ATOM   4041  HB3 ASN   240      76.084  53.113  22.187  0.00  0.00
ATOM   4042  CG  ASN   240      78.028  52.322  22.053  0.00  0.00
ATOM   4043  OD1 ASN   240      78.823  51.667  21.536  0.00  0.00
ATOM   4044  ND2 ASN   240      78.372  52.924  23.067  0.00  0.00
ATOM   4045 1HD2 ASN   240      79.292  52.821  23.391  0.00  0.00
ATOM   4046 2HD2 ASN   240      77.730  53.466  23.511  0.00  0.00
ATOM   4047  C   ASN   240      75.741  50.475  22.799  0.00  0.00
ATOM   4048  O   ASN   240      76.654  49.844  23.294  0.00  0.00
ATOM   4049  N   LEU   241      74.549  50.555  23.390  0.00  0.00
ATOM   4050  H   LEU   241      73.842  51.093  22.944  0.00  0.00
ATOM   4051  CA  LEU   241      74.210  49.880  24.633  0.00  0.00
ATOM   4052  HA  LEU   241      74.855  50.279  25.401  0.00  0.00
ATOM   4053  CB  LEU   241      72.762  50.218  24.981  0.00  0.00
ATOM   4054  HB2 LEU   241      72.635  51.279  24.948  0.00  0.00
ATOM   4055  HB3 LEU   241      72.136  49.797  24.225  0.00  0.00
ATOM   4056  CG  LEU   241      72.269  49.730  26.333  0.00  0.00
ATOM   4057  HG  LEU   241      72.406  48.710  26.409  0.00  0.00
ATOM   4058  CD1 LEU   241      72.947  50.368  27.474  0.00  0.00
ATOM   4059 1HD1 LEU   241      72.954  50.392  27.927  0.00  0.00
ATOM   4060 2HD1 LEU   241      73.352  50.419  27.673  0.00  0.00
ATOM   4061 3HD1 LEU   241      73.022  50.742  27.646  0.00  0.00
ATOM   4062  CD2 LEU   241      70.835  50.000  26.479  0.00  0.00
ATOM   4063 1HD2 LEU   241      70.418  49.906  26.347  0.00  0.00
ATOM   4064 2HD2 LEU   241      70.504  50.012  26.754  0.00  0.00
ATOM   4065 3HD2 LEU   241      70.552  50.276  26.444  0.00  0.00
ATOM   4066  C   LEU   241      74.445  48.361  24.587  0.00  0.00
ATOM   4067  O   LEU   241      74.854  47.781  25.578  0.00  0.00
ATOM   4068  N   LEU   242      74.248  47.714  23.436  0.00  0.00
ATOM   4069  H   LEU   242      73.961  48.249  22.647  0.00  0.00
ATOM   4070  CA  LEU   242      74.519  46.290  23.252  0.00  0.00
ATOM   4071  HA  LEU   242      73.986  45.743  24.019  0.00  0.00
ATOM   4072  CB  LEU   242      74.016  45.825  21.881  0.00  0.00
ATOM   4073  HB2 LEU   242      74.382  46.410  21.172  0.00  0.00
ATOM   4074  HB3 LEU   242      74.373  44.914  21.690  0.00  0.00
ATOM   4075  CG  LEU   242      72.597  45.751  21.670  0.00  0.00
ATOM   4076  HG  LEU   242      72.330  46.576  21.876  0.00  0.00
ATOM   4077  CD1 LEU   242      72.199  45.458  20.465  0.00  0.00
ATOM   4078 1HD1 LEU   242      72.060  45.264  20.179  0.00  0.00
ATOM   4079 2HD1 LEU   242      71.959  45.421  20.167  0.00  0.00
ATOM   4080 3HD1 LEU   242      72.285  45.487  20.170  0.00  0.00
ATOM   4081  CD2 LEU   242      71.885  44.857  22.320  0.00  0.00
ATOM   4082 1HD2 LEU   242      71.814  44.632  22.621  0.00  0.00
ATOM   4083 2HD2 LEU   242      71.546  44.820  22.475  0.00  0.00
ATOM   4084 3HD2 LEU   242      71.740  44.470  22.337  0.00  0.00
ATOM   4085  C   LEU   242      76.010  45.959  23.439  0.00  0.00
ATOM   4086  O   LEU   242      76.341  44.943  24.019  0.00  0.00
ATOM   4087  N   ASN   243      76.911  46.834  23.011  0.00  0.00
ATOM   4088  H   ASN   243      76.573  47.664  22.596  0.00  0.00
ATOM   4089  CA  ASN   243      78.339  46.711  23.239  0.00  0.00
ATOM   4090  HA  ASN   243      78.632  45.690  23.049  0.00  0.00
ATOM   4091  CB  ASN   243      79.058  47.599  22.231  0.00  0.00
ATOM   4092  HB2 ASN   243      78.770  47.334  21.244  0.00  0.00
ATOM   4093  HB3 ASN   243      78.787  48.609  22.371  0.00  0.00
ATOM   4094  CG  ASN   243      80.529  47.491  22.308  0.00  0.00
ATOM   4095  OD1 ASN   243      81.132  47.173  22.576  0.00  0.00
ATOM   4096  ND2 ASN   243      81.144  47.769  22.050  0.00  0.00
ATOM   4097 1HD2 ASN   243      82.104  47.698  22.082  0.00  0.00
ATOM   4098 2HD2 ASN   243      80.650  48.033  21.806  0.00  0.00
ATOM   4099  C   ASN   243      78.733  47.029  24.690  0.00  0.00
ATOM   4100  O   ASN   243      79.585  46.360  25.242  0.00  0.00
ATOM   4101  N   GLN   244      78.076  47.983  25.340  0.00  0.00
ATOM   4102  H   GLN   244      77.400  48.503  24.831  0.00  0.00
ATOM   4103  CA  GLN   244      78.267  48.272  26.765  0.00  0.00
ATOM   4104  HA  GLN   244      79.327  48.401  26.942  0.00  0.00
ATOM   4105  CB  GLN   244      77.555  49.576  27.139  0.00  0.00
ATOM   4106  HB2 GLN   244      76.568  49.531  26.835  0.00  0.00
ATOM   4107  HB3 GLN   244      77.562  49.683  28.172  0.00  0.00
ATOM   4108  CG  GLN   244      78.175  50.793  26.561  0.00  0.00
ATOM   4109  HG2 GLN   244      79.138  50.857  26.907  0.00  0.00
ATOM   4110  HG3 GLN   244      78.219  50.691  25.538  0.00  0.00
ATOM   4111  CD  GLN   244      77.467  52.081  26.887  0.00  0.00
ATOM   4112  OE1 GLN   244      76.507  52.426  26.408  0.00  0.00
ATOM   4113  NE2 GLN   244      77.926  52.852  27.680  0.00  0.00
ATOM   4114 1HE2 GLN   244      77.500  53.721  27.850  0.00  0.00
ATOM   4115 2HE2 GLN   244      78.706  52.581  28.090  0.00  0.00
ATOM   4116  C   GLN   244      77.813  47.116  27.667  0.00  0.00
ATOM   4117  O   GLN   244      78.453  46.828  28.659  0.00  0.00
ATOM   4118  N   LEU   245      76.742  46.412  27.318  0.00  0.00
ATOM   4119  H   LEU   245      76.213  46.728  26.538  0.00  0.00
ATOM   4120  CA  LEU   245      76.296  45.202  28.015  0.00  0.00
ATOM   4121  HA  LEU   245      76.336  45.382  29.081  0.00  0.00
ATOM   4122  CB  LEU   245      74.842  44.894  27.618  0.00  0.00
ATOM   4123  HB2 LEU   245      74.774  44.879  26.547  0.00  0.00
ATOM   4124  HB3 LEU   245      74.588  43.906  27.960  0.00  0.00
ATOM   4125  CG  LEU   245      73.796  45.862  28.166  0.00  0.00
ATOM   4126  HG  LEU   245      74.050  46.854  27.887  0.00  0.00
ATOM   4127  CD1 LEU   245      72.449  45.559  27.596  0.00  0.00
ATOM   4128 1HD1 LEU   245      72.034  45.300  27.674  0.00  0.00
ATOM   4129 2HD1 LEU   245      72.056  45.796  27.468  0.00  0.00
ATOM   4130 3HD1 LEU   245      72.278  45.383  27.202  0.00  0.00
ATOM   4131  CD2 LEU   245      73.684  45.829  29.650  0.00  0.00
ATOM   4132 1HD2 LEU   245      73.516  45.815  29.986  0.00  0.00
ATOM   4133 2HD2 LEU   245      73.743  45.710  30.003  0.00  0.00
ATOM   4134 3HD2 LEU   245      73.714  45.956  30.025  0.00  0.00
ATOM   4135  C   LEU   245      77.206  43.998  27.746  0.00  0.00
ATOM   4136  O   LEU   245      77.385  43.178  28.611  0.00  0.00
ATOM   4137  N   LEU   246      77.826  43.905  26.578  0.00  0.00
ATOM   4138  H   LEU   246      77.601  44.577  25.896  0.00  0.00
ATOM   4139  CA  LEU   246      78.858  42.921  26.282  0.00  0.00
ATOM   4140  HA  LEU   246      78.491  41.957  26.597  0.00  0.00
ATOM   4141  CB  LEU   246      79.076  42.869  24.776  0.00  0.00
ATOM   4142  HB2 LEU   246      78.126  42.745  24.302  0.00  0.00
ATOM   4143  HB3 LEU   246      79.469  43.804  24.450  0.00  0.00
ATOM   4144  CG  LEU   246      79.996  41.771  24.279  0.00  0.00
ATOM   4145  HG  LEU   246      80.944  41.869  24.729  0.00  0.00
ATOM   4146  CD1 LEU   246      79.480  40.415  24.570  0.00  0.00
ATOM   4147 1HD1 LEU   246      79.288  40.077  24.527  0.00  0.00
ATOM   4148 2HD1 LEU   246      79.474  40.038  24.638  0.00  0.00
ATOM   4149 3HD1 LEU   246      79.305  40.150  24.748  0.00  0.00
ATOM   4150  CD2 LEU   246      80.175  41.901  22.804  0.00  0.00
ATOM   4151 1HD2 LEU   246      80.339  41.974  22.419  0.00  0.00
ATOM   4152 2HD2 LEU   246      80.209  41.809  22.440  0.00  0.00
ATOM   4153 3HD2 LEU   246      80.128  41.999  22.468  0.00  0.00
ATOM   4154  C   LEU   246      80.157  43.176  27.057  0.00  0.00
ATOM   4155  O   LEU   246      80.805  42.243  27.470  0.00  0.00
ATOM   4156  N   ASP   247      80.513  44.425  27.308  0.00  0.00
ATOM   4157  H   ASP   247      79.983  45.144  26.874  0.00  0.00
ATOM   4158  CA  ASP   247      81.631  44.818  28.164  0.00  0.00
ATOM   4159  HA  ASP   247      82.498  44.240  27.883  0.00  0.00
ATOM   4160  CB  ASP   247      81.942  46.291  27.914  0.00  0.00
ATOM   4161  HB2 ASP   247      82.129  46.433  26.876  0.00  0.00
ATOM   4162  HB3 ASP   247      81.085  46.869  28.164  0.00  0.00
ATOM   4163  CG  ASP   247      83.127  46.804  28.682  0.00  0.00
ATOM   4164  OD1 ASP   247      82.955  47.601  29.552  0.00  0.00
ATOM   4165  OD2 ASP   247      84.233  46.440  28.398  0.00  0.00
ATOM   4166  C   ASP   247      81.371  44.546  29.655  0.00  0.00
ATOM   4167  O   ASP   247      82.296  44.349  30.416  0.00  0.00
ATOM   4168  N   LEU   248      80.113  44.502  30.081  0.00  0.00
ATOM   4169  H   LEU   248      79.408  44.716  29.416  0.00  0.00
ATOM   4170  CA  LEU   248      79.700  44.174  31.445  0.00  0.00
ATOM   4171  HA  LEU   248      80.392  44.644  32.131  0.00  0.00
ATOM   4172  CB  LEU   248      78.312  44.797  31.674  0.00  0.00
ATOM   4173  HB2 LEU   248      78.369  45.843  31.454  0.00  0.00
ATOM   4174  HB3 LEU   248      77.641  44.359  30.965  0.00  0.00
ATOM   4175  CG  LEU   248      77.693  44.628  33.062  0.00  0.00
ATOM   4176  HG  LEU   248      77.593  43.596  33.269  0.00  0.00
ATOM   4177  CD1 LEU   248      78.493  45.270  34.160  0.00  0.00
ATOM   4178 1HD1 LEU   248      78.814  45.240  34.449  0.00  0.00
ATOM   4179 2HD1 LEU   248      78.739  45.583  34.286  0.00  0.00
ATOM   4180 3HD1 LEU   248      78.498  45.443  34.543  0.00  0.00
ATOM   4181  CD2 LEU   248      76.319  45.214  33.084  0.00  0.00
ATOM   4182 1HD2 LEU   248      75.950  45.314  33.022  0.00  0.00
ATOM   4183 2HD2 LEU   248      75.993  45.290  33.162  0.00  0.00
ATOM   4184 3HD2 LEU   248      76.004  45.435  33.100  0.00  0.00
ATOM   4185  C   LEU   248      79.704  42.669  31.740  0.00  0.00
ATOM   4186  O   LEU   248      80.016  42.277  32.848  0.00  0.00
ATOM   4187  N   GLN   249      79.397  41.828  30.763  0.00  0.00
ATOM   4188  H   GLN   249      79.179  42.223  29.879  0.00  0.00
ATOM   4189  CA  GLN   249      79.270  40.379  30.919  0.00  0.00
ATOM   4190  HA  GLN   249      78.470  40.208  31.620  0.00  0.00
ATOM   4191  CB  GLN   249      78.833  39.754  29.596  0.00  0.00
ATOM   4192  HB2 GLN   249      78.927  40.229  28.939  0.00  0.00
ATOM   4193  HB3 GLN   249      79.242  39.092  29.399  0.00  0.00
ATOM   4194  CG  GLN   249      77.693  39.374  29.413  0.00  0.00
ATOM   4195  HG2 GLN   249      77.489  39.058  30.021  0.00  0.00
ATOM   4196  HG3 GLN   249      77.318  39.888  29.394  0.00  0.00
ATOM   4197  CD  GLN   249      77.314  38.731  28.420  0.00  0.00
ATOM   4198  OE1 GLN   249      77.331  38.431  27.989  0.00  0.00
ATOM   4199  NE2 GLN   249      76.967  38.491  28.019  0.00  0.00
ATOM   4200 1HE2 GLN   249      76.718  38.085  27.374  0.00  0.00
ATOM   4201 2HE2 GLN   249      76.963  38.724  28.369  0.00  0.00
ATOM   4202  C   GLN   249      80.483  39.652  31.541  0.00  0.00
ATOM   4203  O   GLN   249      80.252  38.770  32.353  0.00  0.00
ATOM   4204  N   PRO   250      81.750  39.983  31.248  0.00  0.00
ATOM   4205  CD  PRO   250      82.194  40.766  30.120  0.00  0.00
ATOM   4206  HD2 PRO   250      81.989  41.787  30.278  0.00  0.00
ATOM   4207  HD3 PRO   250      81.750  40.443  29.220  0.00  0.00
ATOM   4208  CG  PRO   250      83.664  40.584  30.028  0.00  0.00
ATOM   4209  HG2 PRO   250      84.113  41.422  29.848  0.00  0.00
ATOM   4210  HG3 PRO   250      83.882  39.950  29.329  0.00  0.00
ATOM   4211  CB  PRO   250      84.105  40.051  31.280  0.00  0.00
ATOM   4212  HB2 PRO   250      84.475  40.780  31.817  0.00  0.00
ATOM   4213  HB3 PRO   250      84.812  39.389  31.114  0.00  0.00
ATOM   4214  CA  PRO   250      82.904  39.442  31.961  0.00  0.00
ATOM   4215  HA  PRO   250      82.921  38.382  31.809  0.00  0.00
ATOM   4216  C   PRO   250      82.953  39.679  33.477  0.00  0.00
ATOM   4217  O   PRO   250      83.789  39.130  34.144  0.00  0.00
ATOM   4218  N   SER   251      82.065  40.481  34.030  0.00  0.00
ATOM   4219  H   SER   251      81.436  40.933  33.418  0.00  0.00
ATOM   4220  CA  SER   251      81.968  40.807  35.451  0.00  0.00
ATOM   4221  HA  SER   251      82.596  40.148  36.011  0.00  0.00
ATOM   4222  CB  SER   251      82.480  42.208  35.687  0.00  0.00
ATOM   4223  HB2 SER   251      82.008  42.757  35.571  0.00  0.00
ATOM   4224  HB3 SER   251      82.702  42.374  36.376  0.00  0.00
ATOM   4225  OG  SER   251      83.268  42.593  35.186  0.00  0.00
ATOM   4226  HG  SER   251      83.289  42.650  34.907  0.00  0.00
ATOM   4227  C   SER   251      80.559  40.660  36.013  0.00  0.00
ATOM   4228  O   SER   251      80.287  41.134  37.088  0.00  0.00
ATOM   4229  N   HIE   252      79.636  40.031  35.297  0.00  0.00
ATOM   4230  H   HIE   252      79.906  39.618  34.442  0.00  0.00
ATOM   4231  CA  HIE   252      78.208  39.988  35.624  0.00  0.00
ATOM   4232  HA  HIE   252      78.068  40.066  36.691  0.00  0.00
ATOM   4233  CB  HIE   252      77.541  41.187  34.971  0.00  0.00
ATOM   4234  HB2 HIE   252      78.114  42.066  35.196  0.00  0.00
ATOM   4235  HB3 HIE   252      77.535  41.058  33.906  0.00  0.00
ATOM   4236  CG  HIE   252      76.149  41.446  35.426  0.00  0.00
ATOM   4237  ND1 HIE   252      75.036  40.753  35.024  0.00  0.00
ATOM   4238  CE1 HIE   252      74.014  41.298  35.662  0.00  0.00
ATOM   4239  HE1 HIE   252      73.003  40.989  35.566  0.00  0.00
ATOM   4240  NE2 HIE   252      74.429  42.266  36.452  0.00  0.00
ATOM   4241  HE2 HIE   252      73.863  42.758  37.093  0.00  0.00
ATOM   4242  CD2 HIE   252      75.773  42.393  36.298  0.00  0.00
ATOM   4243  HD2 HIE   252      76.416  43.076  36.793  0.00  0.00
ATOM   4244  C   HIE   252      77.530  38.696  35.171  0.00  0.00
ATOM   4245  O   HIE   252      77.750  38.259  34.072  0.00  0.00
ATOM   4246  N   SER   253      76.677  38.105  35.988  0.00  0.00
ATOM   4247  H   SER   253      76.605  38.488  36.888  0.00  0.00
ATOM   4248  CA  SER   253      75.978  36.846  35.733  0.00  0.00
ATOM   4249  HA  SER   253      75.974  36.658  34.680  0.00  0.00
ATOM   4250  CB  SER   253      76.709  35.701  36.393  0.00  0.00
ATOM   4251  HB2 SER   253      76.769  35.834  37.389  0.00  0.00
ATOM   4252  HB3 SER   253      76.206  34.840  36.238  0.00  0.00
ATOM   4253  OG  SER   253      77.936  35.537  35.945  0.00  0.00
ATOM   4254  HG  SER   253      78.276  35.473  36.093  0.00  0.00
ATOM   4255  C   SER   253      74.521  36.828  36.176  0.00  0.00
ATOM   4256  O   SER   253      73.857  35.845  35.981  0.00  0.00
ATOM   4257  N   SER   254      73.994  37.884  36.757  0.00  0.00
ATOM   4258  H   SER   254      74.575  38.652  36.872  0.00  0.00
ATOM   4259  CA  SER   254      72.600  37.980  37.203  0.00  0.00
ATOM   4260  HA  SER   254      72.399  37.122  37.824  0.00  0.00
ATOM   4261  CB  SER   254      72.423  39.214  38.078  0.00  0.00
ATOM   4262  HB2 SER   254      72.811  39.124  38.900  0.00  0.00
ATOM   4263  HB3 SER   254      72.809  39.956  37.718  0.00  0.00
ATOM   4264  OG  SER   254      71.278  39.571  38.306  0.00  0.00
ATOM   4265  HG  SER   254      71.055  39.355  39.135  0.00  0.00
ATOM   4266  C   SER   254      71.614  38.002  36.023  0.00  0.00
ATOM   4267  O   SER   254      71.862  38.674  35.026  0.00  0.00
ATOM   4268  N   PRO   255      70.469  37.306  36.104  0.00  0.00
ATOM   4269  CD  PRO   255      70.038  36.491  37.206  0.00  0.00
ATOM   4270  HD2 PRO   255      69.853  37.078  38.048  0.00  0.00
ATOM   4271  HD3 PRO   255      70.745  35.758  37.442  0.00  0.00
ATOM   4272  CG  PRO   255      68.788  35.842  36.780  0.00  0.00
ATOM   4273  HG2 PRO   255      68.114  36.067  37.359  0.00  0.00
ATOM   4274  HG3 PRO   255      68.886  34.925  36.758  0.00  0.00
ATOM   4275  CB  PRO   255      68.425  36.261  35.497  0.00  0.00
ATOM   4276  HB2 PRO   255      67.567  36.679  35.542  0.00  0.00
ATOM   4277  HB3 PRO   255      68.354  35.476  34.949  0.00  0.00
ATOM   4278  CA  PRO   255      69.507  37.189  35.008  0.00  0.00
ATOM   4279  HA  PRO   255      70.005  36.732  34.175  0.00  0.00
ATOM   4280  C   PRO   255      68.895  38.500  34.504  0.00  0.00
ATOM   4281  O   PRO   255      68.400  38.543  33.393  0.00  0.00
ATOM   4282  N   TYR   256      68.956  39.584  35.268  0.00  0.00
ATOM   4283  H   TYR   256      69.340  39.506  36.181  0.00  0.00
ATOM   4284  CA  TYR   256      68.467  40.898  34.839  0.00  0.00
ATOM   4285  HA  TYR   256      67.409  40.824  34.635  0.00  0.00
ATOM   4286  CB  TYR   256      68.646  41.914  35.957  0.00  0.00
ATOM   4287  HB2 TYR   256      69.685  41.929  36.239  0.00  0.00
ATOM   4288  HB3 TYR   256      68.408  42.889  35.570  0.00  0.00
ATOM   4289  CG  TYR   256      67.793  41.701  37.178  0.00  0.00
ATOM   4290  CD1 TYR   256      66.457  41.673  37.099  0.00  0.00
ATOM   4291  HD1 TYR   256      66.036  41.788  36.173  0.00  0.00
ATOM   4292  CE1 TYR   256      65.661  41.453  38.221  0.00  0.00
ATOM   4293  HE1 TYR   256      64.643  41.428  38.149  0.00  0.00
ATOM   4294  CZ  TYR   256      66.194  41.275  39.440  0.00  0.00
ATOM   4295  OH  TYR   256      65.435  41.061  40.523  0.00  0.00
ATOM   4296  HH  TYR   256      64.541  41.102  40.341  0.00  0.00
ATOM   4297  CE2 TYR   256      67.531  41.340  39.524  0.00  0.00
ATOM   4298  HE2 TYR   256      67.934  41.218  40.458  0.00  0.00
ATOM   4299  CD2 TYR   256      68.328  41.548  38.401  0.00  0.00
ATOM   4300  HD2 TYR   256      69.349  41.603  38.480  0.00  0.00
ATOM   4301  C   TYR   256      69.121  41.414  33.549  0.00  0.00
ATOM   4302  O   TYR   256      68.470  42.115  32.791  0.00  0.00
ATOM   4303  N   LEU   257      70.371  41.041  33.252  0.00  0.00
ATOM   4304  H   LEU   257      70.858  40.438  33.885  0.00  0.00
ATOM   4305  CA  LEU   257      71.037  41.411  32.004  0.00  0.00
ATOM   4306  HA  LEU   257      70.935  42.481  31.890  0.00  0.00
ATOM   4307  CB  LEU   257      72.530  41.068  32.118  0.00  0.00
ATOM   4308  HB2 LEU   257      72.879  41.496  33.035  0.00  0.00
ATOM   4309  HB3 LEU   257      72.656  40.008  32.194  0.00  0.00
ATOM   4310  CG  LEU   257      73.421  41.605  31.002  0.00  0.00
ATOM   4311  HG  LEU   257      73.066  42.465  30.719  0.00  0.00
ATOM   4312  CD1 LEU   257      74.763  41.839  31.392  0.00  0.00
ATOM   4313 1HD1 LEU   257      75.233  41.472  31.323  0.00  0.00
ATOM   4314 2HD1 LEU   257      75.127  42.269  31.175  0.00  0.00
ATOM   4315 3HD1 LEU   257      74.911  41.949  31.956  0.00  0.00
ATOM   4316  CD2 LEU   257      73.531  40.788  29.880  0.00  0.00
ATOM   4317 1HD2 LEU   257      73.279  40.595  29.580  0.00  0.00
ATOM   4318 2HD2 LEU   257      73.746  40.750  29.434  0.00  0.00
ATOM   4319 3HD2 LEU   257      73.663  40.433  29.769  0.00  0.00
ATOM   4320  C   LEU   257      70.349  40.777  30.790  0.00  0.00
ATOM   4321  O   LEU   257      70.015  41.477  29.854  0.00  0.00
ATOM   4322  N   ILE   258      70.086  39.471  30.817  0.00  0.00
ATOM   4323  H   ILE   258      70.341  38.957  31.624  0.00  0.00
ATOM   4324  CA  ILE   258      69.405  38.783  29.710  0.00  0.00
ATOM   4325  HA  ILE   258      69.829  39.159  28.789  0.00  0.00
ATOM   4326  CB  ILE   258      69.661  37.263  29.712  0.00  0.00
ATOM   4327  HB  ILE   258      69.079  36.870  28.903  0.00  0.00
ATOM   4328  CG2 ILE   258      71.123  36.987  29.398  0.00  0.00
ATOM   4329 1HG2 ILE   258      71.509  36.901  29.431  0.00  0.00
ATOM   4330 2HG2 ILE   258      71.455  36.830  29.233  0.00  0.00
ATOM   4331 3HG2 ILE   258      71.483  37.035  29.269  0.00  0.00
ATOM   4332  CG1 ILE   258      69.203  36.541  30.984  0.00  0.00
ATOM   4333 2HG1 ILE   258      69.829  36.829  31.792  0.00  0.00
ATOM   4334 3HG1 ILE   258      68.205  36.847  31.207  0.00  0.00
ATOM   4335  CD1 ILE   258      69.196  35.032  30.902  0.00  0.00
ATOM   4336 1HD1 ILE   258      69.196  34.689  30.770  0.00  0.00
ATOM   4337 2HD1 ILE   258      69.296  34.650  30.947  0.00  0.00
ATOM   4338 3HD1 ILE   258      69.080  34.671  30.946  0.00  0.00
ATOM   4339  C   ILE   258      67.915  39.124  29.631  0.00  0.00
ATOM   4340  O   ILE   258      67.369  39.188  28.541  0.00  0.00
ATOM   4341  N   ALA   259      67.266  39.449  30.749  0.00  0.00
ATOM   4342  H   ALA   259      67.732  39.335  31.621  0.00  0.00
ATOM   4343  CA  ALA   259      65.924  40.030  30.758  0.00  0.00
ATOM   4344  HA  ALA   259      65.258  39.401  30.185  0.00  0.00
ATOM   4345  CB  ALA   259      65.398  40.047  32.190  0.00  0.00
ATOM   4346  HB1 ALA   259      65.385  39.913  32.556  0.00  0.00
ATOM   4347  HB2 ALA   259      65.333  40.226  32.555  0.00  0.00
ATOM   4348  HB3 ALA   259      65.097  40.027  32.475  0.00  0.00
ATOM   4349  C   ALA   259      65.883  41.425  30.099  0.00  0.00
ATOM   4350  O   ALA   259      64.952  41.730  29.380  0.00  0.00
ATOM   4351  N   PHE   260      66.902  42.252  30.279  0.00  0.00
ATOM   4352  H   PHE   260      67.639  41.982  30.885  0.00  0.00
ATOM   4353  CA  PHE   260      67.045  43.534  29.580  0.00  0.00
ATOM   4354  HA  PHE   260      66.111  44.075  29.668  0.00  0.00
ATOM   4355  CB  PHE   260      68.125  44.377  30.261  0.00  0.00
ATOM   4356  HB2 PHE   260      68.012  44.316  31.313  0.00  0.00
ATOM   4357  HB3 PHE   260      69.089  43.984  30.040  0.00  0.00
ATOM   4358  CG  PHE   260      68.101  45.823  29.887  0.00  0.00
ATOM   4359  CD1 PHE   260      67.459  46.716  30.644  0.00  0.00
ATOM   4360  HD1 PHE   260      66.978  46.384  31.484  0.00  0.00
ATOM   4361  CE1 PHE   260      67.431  48.045  30.306  0.00  0.00
ATOM   4362  HE1 PHE   260      66.938  48.721  30.882  0.00  0.00
ATOM   4363  CZ  PHE   260      68.019  48.484  29.204  0.00  0.00
ATOM   4364  HZ  PHE   260      67.961  49.499  28.946  0.00  0.00
ATOM   4365  CE2 PHE   260      68.657  47.602  28.446  0.00  0.00
ATOM   4366  HE2 PHE   260      69.088  47.941  27.593  0.00  0.00
ATOM   4367  CD2 PHE   260      68.704  46.274  28.782  0.00  0.00
ATOM   4368  HD2 PHE   260      69.187  45.601  28.190  0.00  0.00
ATOM   4369  C   PHE   260      67.317  43.363  28.083  0.00  0.00
ATOM   4370  O   PHE   260      66.792  44.122  27.284  0.00  0.00
ATOM   4371  N   LEU   261      68.092  42.356  27.680  0.00  0.00
ATOM   4372  H   LEU   261      68.565  41.814  28.369  0.00  0.00
ATOM   4373  CA  LEU   261      68.298  42.036  26.267  0.00  0.00
ATOM   4374  HA  LEU   261      68.661  42.929  25.772  0.00  0.00
ATOM   4375  CB  LEU   261      69.349  40.931  26.078  0.00  0.00
ATOM   4376  HB2 LEU   261      69.093  40.088  26.686  0.00  0.00
ATOM   4377  HB3 LEU   261      69.296  40.593  25.060  0.00  0.00
ATOM   4378  CG  LEU   261      70.793  41.319  26.364  0.00  0.00
ATOM   4379  HG  LEU   261      70.866  41.675  27.357  0.00  0.00
ATOM   4380  CD1 LEU   261      71.704  40.127  26.226  0.00  0.00
ATOM   4381 1HD1 LEU   261      72.306  40.127  26.312  0.00  0.00
ATOM   4382 2HD1 LEU   261      71.669  39.620  26.551  0.00  0.00
ATOM   4383 3HD1 LEU   261      71.801  39.781  25.737  0.00  0.00
ATOM   4384  CD2 LEU   261      71.307  42.386  25.450  0.00  0.00
ATOM   4385 1HD2 LEU   261      71.352  42.576  25.080  0.00  0.00
ATOM   4386 2HD2 LEU   261      71.359  42.800  25.342  0.00  0.00
ATOM   4387 3HD2 LEU   261      71.611  42.581  25.288  0.00  0.00
ATOM   4388  C   LEU   261      66.995  41.681  25.541  0.00  0.00
ATOM   4389  O   LEU   261      66.780  42.156  24.441  0.00  0.00
ATOM   4390  N   VAL   262      66.087  40.926  26.163  0.00  0.00
ATOM   4391  H   VAL   262      66.313  40.553  27.060  0.00  0.00
ATOM   4392  CA  VAL   262      64.739  40.682  25.601  0.00  0.00
ATOM   4393  HA  VAL   262      64.857  40.245  24.620  0.00  0.00
ATOM   4394  CB  VAL   262      63.923  39.714  26.472  0.00  0.00
ATOM   4395  HB  VAL   262      63.828  40.071  27.395  0.00  0.00
ATOM   4396  CG1 VAL   262      62.612  39.437  26.005  0.00  0.00
ATOM   4397 1HG1 VAL   262      62.331  39.091  25.914  0.00  0.00
ATOM   4398 2HG1 VAL   262      62.207  39.534  26.123  0.00  0.00
ATOM   4399 3HG1 VAL   262      62.328  39.500  25.655  0.00  0.00
ATOM   4400  CG2 VAL   262      64.519  38.433  26.601  0.00  0.00
ATOM   4401 1HG2 VAL   262      64.516  38.097  26.587  0.00  0.00
ATOM   4402 2HG2 VAL   262      64.755  38.097  26.558  0.00  0.00
ATOM   4403 3HG2 VAL   262      64.727  38.155  26.770  0.00  0.00
ATOM   4404  C   VAL   262      63.968  41.982  25.379  0.00  0.00
ATOM   4405  O   VAL   262      63.273  42.112  24.393  0.00  0.00
ATOM   4406  N   ASP   263      64.099  42.959  26.256  0.00  0.00
ATOM   4407  H   ASP   263      64.711  42.816  27.017  0.00  0.00
ATOM   4408  CA  ASP   263      63.406  44.248  26.166  0.00  0.00
ATOM   4409  HA  ASP   263      62.357  44.046  26.009  0.00  0.00
ATOM   4410  CB  ASP   263      63.558  44.999  27.489  0.00  0.00
ATOM   4411  HB2 ASP   263      63.925  44.408  28.164  0.00  0.00
ATOM   4412  HB3 ASP   263      64.174  45.741  27.415  0.00  0.00
ATOM   4413  CG  ASP   263      62.380  45.542  28.048  0.00  0.00
ATOM   4414  OD1 ASP   263      62.210  45.929  28.438  0.00  0.00
ATOM   4415  OD2 ASP   263      61.623  45.601  28.137  0.00  0.00
ATOM   4416  C   ASP   263      63.873  45.103  24.980  0.00  0.00
ATOM   4417  O   ASP   263      63.052  45.613  24.229  0.00  0.00
ATOM   4418  N   ILE   264      65.177  45.207  24.758  0.00  0.00
ATOM   4419  H   ILE   264      65.795  44.753  25.389  0.00  0.00
ATOM   4420  CA  ILE   264      65.724  45.898  23.584  0.00  0.00
ATOM   4421  HA  ILE   264      65.128  46.795  23.460  0.00  0.00
ATOM   4422  CB  ILE   264      67.171  46.381  23.812  0.00  0.00
ATOM   4423  HB  ILE   264      67.171  46.968  24.707  0.00  0.00
ATOM   4424  CG2 ILE   264      68.148  45.248  24.043  0.00  0.00
ATOM   4425 1HG2 ILE   264      68.347  44.982  24.355  0.00  0.00
ATOM   4426 2HG2 ILE   264      68.251  44.828  23.972  0.00  0.00
ATOM   4427 3HG2 ILE   264      68.547  45.097  24.012  0.00  0.00
ATOM   4428  CG1 ILE   264      67.651  47.277  22.668  0.00  0.00
ATOM   4429 2HG1 ILE   264      67.833  46.688  21.809  0.00  0.00
ATOM   4430 3HG1 ILE   264      66.878  47.958  22.420  0.00  0.00
ATOM   4431  CD1 ILE   264      68.894  48.091  22.956  0.00  0.00
ATOM   4432 1HD1 ILE   264      69.202  48.233  23.105  0.00  0.00
ATOM   4433 2HD1 ILE   264      69.217  48.262  22.927  0.00  0.00
ATOM   4434 3HD1 ILE   264      69.146  48.378  23.037  0.00  0.00
ATOM   4435  C   ILE   264      65.540  45.109  22.281  0.00  0.00
ATOM   4436  O   ILE   264      65.261  45.713  21.260  0.00  0.00
ATOM   4437  N   TYR   265      65.595  43.781  22.292  0.00  0.00
ATOM   4438  H   TYR   265      65.847  43.311  23.136  0.00  0.00
ATOM   4439  CA  TYR   265      65.302  42.968  21.110  0.00  0.00
ATOM   4440  HA  TYR   265      65.855  43.366  20.269  0.00  0.00
ATOM   4441  CB  TYR   265      65.732  41.511  21.320  0.00  0.00
ATOM   4442  HB2 TYR   265      65.239  41.149  22.209  0.00  0.00
ATOM   4443  HB3 TYR   265      65.352  40.926  20.494  0.00  0.00
ATOM   4444  CG  TYR   265      67.214  41.222  21.425  0.00  0.00
ATOM   4445  CD1 TYR   265      67.635  40.095  22.109  0.00  0.00
ATOM   4446  HD1 TYR   265      66.919  39.478  22.561  0.00  0.00
ATOM   4447  CE1 TYR   265      68.991  39.776  22.222  0.00  0.00
ATOM   4448  HE1 TYR   265      69.310  38.922  22.751  0.00  0.00
ATOM   4449  CZ  TYR   265      69.939  40.581  21.631  0.00  0.00
ATOM   4450  OH  TYR   265      71.241  40.254  21.709  0.00  0.00
ATOM   4451  HH  TYR   265      71.371  39.454  22.172  0.00  0.00
ATOM   4452  CE2 TYR   265      69.523  41.703  20.931  0.00  0.00
ATOM   4453  HE2 TYR   265      70.250  42.311  20.474  0.00  0.00
ATOM   4454  CD2 TYR   265      68.168  42.021  20.835  0.00  0.00
ATOM   4455  HD2 TYR   265      67.879  42.883  20.291  0.00  0.00
ATOM   4456  C   TYR   265      63.823  43.053  20.702  0.00  0.00
ATOM   4457  O   TYR   265      63.529  43.129  19.520  0.00  0.00
ATOM   4458  N   GLU   266      62.879  43.119  21.640  0.00  0.00
ATOM   4459  H   GLU   266      63.148  43.014  22.593  0.00  0.00
ATOM   4460  CA  GLU   266      61.464  43.380  21.345  0.00  0.00
ATOM   4461  HA  GLU   266      61.160  42.700  20.561  0.00  0.00
ATOM   4462  CB  GLU   266      60.622  43.076  22.583  0.00  0.00
ATOM   4463  HB2 GLU   266      60.941  42.123  22.958  0.00  0.00
ATOM   4464  HB3 GLU   266      60.818  43.802  23.347  0.00  0.00
ATOM   4465  CG  GLU   266      59.127  42.955  22.309  0.00  0.00
ATOM   4466  HG2 GLU   266      58.953  42.848  21.360  0.00  0.00
ATOM   4467  HG3 GLU   266      58.785  42.153  22.729  0.00  0.00
ATOM   4468  CD  GLU   266      58.264  43.993  22.751  0.00  0.00
ATOM   4469  OE1 GLU   266      57.305  44.183  22.327  0.00  0.00
ATOM   4470  OE2 GLU   266      58.478  44.620  23.540  0.00  0.00
ATOM   4471  C   GLU   266      61.218  44.800  20.809  0.00  0.00
ATOM   4472  O   GLU   266      60.374  44.984  19.952  0.00  0.00
ATOM   4473  N   ASP   267      61.982  45.798  21.256  0.00  0.00
ATOM   4474  H   ASP   267      62.638  45.591  21.976  0.00  0.00
ATOM   4475  CA  ASP   267      61.956  47.151  20.700  0.00  0.00
ATOM   4476  HA  ASP   267      60.925  47.482  20.681  0.00  0.00
ATOM   4477  CB  ASP   267      62.747  48.102  21.601  0.00  0.00
ATOM   4478  HB2 ASP   267      62.437  47.958  22.618  0.00  0.00
ATOM   4479  HB3 ASP   267      63.797  47.883  21.529  0.00  0.00
ATOM   4480  CG  ASP   267      62.514  49.552  21.243  0.00  0.00
ATOM   4481  OD1 ASP   267      63.238  50.101  20.419  0.00  0.00
ATOM   4482  OD2 ASP   267      61.641  50.166  21.818  0.00  0.00
ATOM   4483  C   ASP   267      62.494  47.191  19.262  0.00  0.00
ATOM   4484  O   ASP   267      61.871  47.793  18.408  0.00  0.00
ATOM   4485  N   MET   268      63.597  46.504  18.981  0.00  0.00
ATOM   4486  H   MET   268      64.060  46.056  19.742  0.00  0.00
ATOM   4487  CA  MET   268      64.196  46.392  17.644  0.00  0.00
ATOM   4488  HA  MET   268      64.314  47.385  17.233  0.00  0.00
ATOM   4489  CB  MET   268      65.583  45.754  17.737  0.00  0.00
ATOM   4490  HB2 MET   268      65.547  44.877  18.358  0.00  0.00
ATOM   4491  HB3 MET   268      65.901  45.450  16.753  0.00  0.00
ATOM   4492  CG  MET   268      66.624  46.709  18.297  0.00  0.00
ATOM   4493  HG2 MET   268      66.684  47.561  17.673  0.00  0.00
ATOM   4494  HG3 MET   268      66.314  47.039  19.250  0.00  0.00
ATOM   4495  SD  MET   268      68.250  46.033  18.467  0.00  0.00
ATOM   4496  CE  MET   268      69.094  47.232  18.510  0.00  0.00
ATOM   4497  HE1 MET   268      69.164  47.528  18.481  0.00  0.00
ATOM   4498  HE2 MET   268      69.253  47.421  18.630  0.00  0.00
ATOM   4499  HE3 MET   268      69.383  47.482  18.432  0.00  0.00
ATOM   4500  C   MET   268      63.315  45.613  16.655  0.00  0.00
ATOM   4501  O   MET   268      63.271  45.947  15.479  0.00  0.00
ATOM   4502  N   LEU   269      62.570  44.623  17.137  0.00  0.00
ATOM   4503  H   LEU   269      62.704  44.370  18.092  0.00  0.00
ATOM   4504  CA  LEU   269      61.555  43.905  16.370  0.00  0.00
ATOM   4505  HA  LEU   269      62.006  43.577  15.444  0.00  0.00
ATOM   4506  CB  LEU   269      61.121  42.680  17.187  0.00  0.00
ATOM   4507  HB2 LEU   269      61.973  42.106  17.439  0.00  0.00
ATOM   4508  HB3 LEU   269      60.701  43.017  18.095  0.00  0.00
ATOM   4509  CG  LEU   269      60.125  41.752  16.541  0.00  0.00
ATOM   4510  HG  LEU   269      59.247  42.286  16.299  0.00  0.00
ATOM   4511  CD1 LEU   269      60.659  41.132  15.300  0.00  0.00
ATOM   4512 1HD1 LEU   269      60.576  40.961  14.932  0.00  0.00
ATOM   4513 2HD1 LEU   269      60.890  41.161  14.946  0.00  0.00
ATOM   4514 3HD1 LEU   269      60.884  40.829  15.112  0.00  0.00
ATOM   4515  CD2 LEU   269      59.757  40.643  17.489  0.00  0.00
ATOM   4516 1HD2 LEU   269      59.954  40.319  17.774  0.00  0.00
ATOM   4517 2HD2 LEU   269      59.515  40.587  17.873  0.00  0.00
ATOM   4518 3HD2 LEU   269      59.512  40.227  17.498  0.00  0.00
ATOM   4519  C   LEU   269      60.372  44.803  15.996  0.00  0.00
ATOM   4520  O   LEU   269      59.895  44.744  14.884  0.00  0.00
ATOM   4521  N   GLU   270      59.919  45.670  16.886  0.00  0.00
ATOM   4522  H   GLU   270      60.336  45.667  17.786  0.00  0.00
ATOM   4523  CA  GLU   270      58.878  46.661  16.607  0.00  0.00
ATOM   4524  HA  GLU   270      58.084  46.169  16.075  0.00  0.00
ATOM   4525  CB  GLU   270      58.308  47.169  17.929  0.00  0.00
ATOM   4526  HB2 GLU   270      58.132  46.352  18.551  0.00  0.00
ATOM   4527  HB3 GLU   270      58.996  47.790  18.404  0.00  0.00
ATOM   4528  CG  GLU   270      57.044  47.921  17.783  0.00  0.00
ATOM   4529  HG2 GLU   270      57.199  48.714  17.554  0.00  0.00
ATOM   4530  HG3 GLU   270      56.576  47.599  17.169  0.00  0.00
ATOM   4531  CD  GLU   270      56.213  48.046  18.777  0.00  0.00
ATOM   4532  OE1 GLU   270      55.979  48.803  18.998  0.00  0.00
ATOM   4533  OE2 GLU   270      55.769  47.382  19.326  0.00  0.00
ATOM   4534  C   GLU   270      59.366  47.814  15.718  0.00  0.00
ATOM   4535  O   GLU   270      58.630  48.308  14.892  0.00  0.00
ATOM   4536  N   ASN   271      60.631  48.190  15.824  0.00  0.00
ATOM   4537  H   ASN   271      61.158  47.786  16.556  0.00  0.00
ATOM   4538  CA  ASN   271      61.308  49.134  14.942  0.00  0.00
ATOM   4539  HA  ASN   271      60.656  49.973  14.764  0.00  0.00
ATOM   4540  CB  ASN   271      62.544  49.646  15.672  0.00  0.00
ATOM   4541  HB2 ASN   271      62.285  49.900  16.671  0.00  0.00
ATOM   4542  HB3 ASN   271      63.278  48.879  15.719  0.00  0.00
ATOM   4543  CG  ASN   271      63.164  50.856  15.036  0.00  0.00
ATOM   4544  OD1 ASN   271      63.163  51.452  14.556  0.00  0.00
ATOM   4545  ND2 ASN   271      63.727  51.253  15.021  0.00  0.00
ATOM   4546 1HD2 ASN   271      64.144  52.033  14.617  0.00  0.00
ATOM   4547 2HD2 ASN   271      63.741  50.766  15.419  0.00  0.00
ATOM   4548  C   ASN   271      61.640  48.533  13.567  0.00  0.00
ATOM   4549  O   ASN   271      62.054  49.243  12.681  0.00  0.00
ATOM   4550  N   GLN   272      61.442  47.236  13.371  0.00  0.00
ATOM   4551  H   GLN   272      61.116  46.729  14.149  0.00  0.00
ATOM   4552  CA  GLN   272      61.732  46.475  12.164  0.00  0.00
ATOM   4553  HA  GLN   272      61.678  45.439  12.441  0.00  0.00
ATOM   4554  CB  GLN   272      60.660  46.701  11.113  0.00  0.00
ATOM   4555  HB2 GLN   272      60.627  47.667  10.832  0.00  0.00
ATOM   4556  HB3 GLN   272      60.871  46.171  10.279  0.00  0.00
ATOM   4557  CG  GLN   272      59.324  46.332  11.519  0.00  0.00
ATOM   4558  HG2 GLN   272      59.356  45.720  12.006  0.00  0.00
ATOM   4559  HG3 GLN   272      58.955  46.877  11.940  0.00  0.00
ATOM   4560  CD  GLN   272      58.419  46.041  10.702  0.00  0.00
ATOM   4561  OE1 GLN   272      58.312  45.786   9.928  0.00  0.00
ATOM   4562  NE2 GLN   272      57.723  46.051  10.847  0.00  0.00
ATOM   4563 1HE2 GLN   272      57.120  45.863  10.317  0.00  0.00
ATOM   4564 2HE2 GLN   272      57.780  46.231  11.495  0.00  0.00
ATOM   4565  C   GLN   272      63.167  46.673  11.653  0.00  0.00
ATOM   4566  O   GLN   272      63.395  46.967  10.495  0.00  0.00
ATOM   4567  N   CYS   273      64.139  46.543  12.542  0.00  0.00
ATOM   4568  H   CYS   273      63.883  46.367  13.487  0.00  0.00
ATOM   4569  CA  CYS   273      65.566  46.585  12.232  0.00  0.00
ATOM   4570  HA  CYS   273      65.796  47.547  11.802  0.00  0.00
ATOM   4571  CB  CYS   273      66.355  46.444  13.525  0.00  0.00
ATOM   4572  HB2 CYS   273      66.045  45.575  14.050  0.00  0.00
ATOM   4573  HB3 CYS   273      67.390  46.341  13.310  0.00  0.00
ATOM   4574  SG  CYS   273      66.139  47.866  14.573  0.00  0.00
ATOM   4575  HG  CYS   273      66.266  48.113  14.486  0.00  0.00
ATOM   4576  C   CYS   273      66.006  45.529  11.210  0.00  0.00
ATOM   4577  O   CYS   273      65.284  44.591  10.912  0.00  0.00
ATOM   4578  N   ASP   274      67.208  45.664  10.684  0.00  0.00
ATOM   4579  H   ASP   274      67.739  46.456  10.949  0.00  0.00
ATOM   4580  CA  ASP   274      67.820  44.725   9.754  0.00  0.00
ATOM   4581  HA  ASP   274      67.214  44.699   8.873  0.00  0.00
ATOM   4582  CB  ASP   274      69.192  45.228   9.373  0.00  0.00
ATOM   4583  HB2 ASP   274      69.162  46.137   9.091  0.00  0.00
ATOM   4584  HB3 ASP   274      69.788  45.205  10.108  0.00  0.00
ATOM   4585  CG  ASP   274      69.800  44.557   8.366  0.00  0.00
ATOM   4586  OD1 ASP   274      70.003  44.435   7.899  0.00  0.00
ATOM   4587  OD2 ASP   274      70.077  44.141   8.024  0.00  0.00
ATOM   4588  C   ASP   274      67.890  43.304  10.319  0.00  0.00
ATOM   4589  O   ASP   274      68.301  43.101  11.439  0.00  0.00
ATOM   4590  N   ASN   275      67.504  42.329   9.521  0.00  0.00
ATOM   4591  H   ASN   275      67.251  42.589   8.601  0.00  0.00
ATOM   4592  CA  ASN   275      67.363  40.928   9.876  0.00  0.00
ATOM   4593  HA  ASN   275      66.778  40.493   9.098  0.00  0.00
ATOM   4594  CB  ASN   275      68.723  40.252   9.836  0.00  0.00
ATOM   4595  HB2 ASN   275      69.241  40.575   9.064  0.00  0.00
ATOM   4596  HB3 ASN   275      69.245  40.463  10.637  0.00  0.00
ATOM   4597  CG  ASN   275      68.713  38.865   9.729  0.00  0.00
ATOM   4598  OD1 ASN   275      67.816  38.250   9.580  0.00  0.00
ATOM   4599  ND2 ASN   275      69.734  38.334   9.785  0.00  0.00
ATOM   4600 1HD2 ASN   275      69.744  37.424   9.723  0.00  0.00
ATOM   4601 2HD2 ASN   275      70.474  38.837   9.908  0.00  0.00
ATOM   4602  C   ASN   275      66.553  40.685  11.160  0.00  0.00
ATOM   4603  O   ASN   275      66.988  40.007  12.073  0.00  0.00
ATOM   4604  N   LYS   276      65.361  41.259  11.244  0.00  0.00
ATOM   4605  H   LYS   276      65.081  41.823  10.478  0.00  0.00
ATOM   4606  CA  LYS   276      64.440  41.135  12.377  0.00  0.00
ATOM   4607  HA  LYS   276      64.954  41.554  13.225  0.00  0.00
ATOM   4608  CB  LYS   276      63.187  41.986  12.161  0.00  0.00
ATOM   4609  HB2 LYS   276      62.670  42.083  13.080  0.00  0.00
ATOM   4610  HB3 LYS   276      63.473  42.961  11.868  0.00  0.00
ATOM   4611  CG  LYS   276      62.219  41.455  11.151  0.00  0.00
ATOM   4612  HG2 LYS   276      62.529  41.493  10.362  0.00  0.00
ATOM   4613  HG3 LYS   276      62.035  40.639  11.281  0.00  0.00
ATOM   4614  CD  LYS   276      61.051  41.996  11.005  0.00  0.00
ATOM   4615  HD2 LYS   276      60.733  41.977  11.748  0.00  0.00
ATOM   4616  HD3 LYS   276      61.203  42.786  10.854  0.00  0.00
ATOM   4617  CE  LYS   276      60.103  41.504  10.036  0.00  0.00
ATOM   4618  HE2 LYS   276      59.882  41.639   9.844  0.00  0.00
ATOM   4619  HE3 LYS   276      60.082  41.337   9.734  0.00  0.00
ATOM   4620  NZ  LYS   276      59.491  41.107   9.764  0.00  0.00
ATOM   4621  HZ1 LYS   276      59.244  40.942   9.579  0.00  0.00
ATOM   4622  HZ2 LYS   276      59.417  41.029   9.683  0.00  0.00
ATOM   4623  HZ3 LYS   276      59.349  41.040   9.823  0.00  0.00
ATOM   4624  C   LYS   276      64.101  39.696  12.781  0.00  0.00
ATOM   4625  O   LYS   276      63.820  39.456  13.934  0.00  0.00
ATOM   4626  N   GLU   277      64.157  38.735  11.874  0.00  0.00
ATOM   4627  H   GLU   277      64.386  39.000  10.950  0.00  0.00
ATOM   4628  CA  GLU   277      63.953  37.318  12.167  0.00  0.00
ATOM   4629  HA  GLU   277      63.023  37.205  12.693  0.00  0.00
ATOM   4630  CB  GLU   277      63.857  36.536  10.865  0.00  0.00
ATOM   4631  HB2 GLU   277      64.546  36.774  10.238  0.00  0.00
ATOM   4632  HB3 GLU   277      63.973  35.596  11.025  0.00  0.00
ATOM   4633  CG  GLU   277      62.663  36.633  10.195  0.00  0.00
ATOM   4634  HG2 GLU   277      62.461  36.492  10.167  0.00  0.00
ATOM   4635  HG3 GLU   277      62.292  36.787  10.148  0.00  0.00
ATOM   4636  CD  GLU   277      62.230  36.676   9.594  0.00  0.00
ATOM   4637  OE1 GLU   277      62.529  36.615   9.229  0.00  0.00
ATOM   4638  OE2 GLU   277      61.582  36.769   9.479  0.00  0.00
ATOM   4639  C   GLU   277      65.037  36.714  13.062  0.00  0.00
ATOM   4640  O   GLU   277      64.746  35.843  13.863  0.00  0.00
ATOM   4641  N   ASP   278      66.273  37.191  12.975  0.00  0.00
ATOM   4642  H   ASP   278      66.454  37.900  12.308  0.00  0.00
ATOM   4643  CA  ASP   278      67.354  36.818  13.886  0.00  0.00
ATOM   4644  HA  ASP   278      67.339  35.748  14.031  0.00  0.00
ATOM   4645  CB  ASP   278      68.689  37.181  13.251  0.00  0.00
ATOM   4646  HB2 ASP   278      68.757  36.672  12.318  0.00  0.00
ATOM   4647  HB3 ASP   278      68.724  38.230  13.063  0.00  0.00
ATOM   4648  CG  ASP   278      69.881  36.788  14.085  0.00  0.00
ATOM   4649  OD1 ASP   278      70.612  37.645  14.529  0.00  0.00
ATOM   4650  OD2 ASP   278      70.124  35.621  14.277  0.00  0.00
ATOM   4651  C   ASP   278      67.196  37.472  15.258  0.00  0.00
ATOM   4652  O   ASP   278      67.417  36.826  16.270  0.00  0.00
ATOM   4653  N   ILE   279      66.725  38.717  15.317  0.00  0.00
ATOM   4654  H   ILE   279      66.528  39.167  14.454  0.00  0.00
ATOM   4655  CA  ILE   279      66.368  39.416  16.565  0.00  0.00
ATOM   4656  HA  ILE   279      67.220  39.384  17.230  0.00  0.00
ATOM   4657  CB  ILE   279      66.034  40.888  16.266  0.00  0.00
ATOM   4658  HB  ILE   279      65.244  40.913  15.558  0.00  0.00
ATOM   4659  CG2 ILE   279      65.544  41.635  17.480  0.00  0.00
ATOM   4660 1HG2 ILE   279      65.981  41.929  17.931  0.00  0.00
ATOM   4661 2HG2 ILE   279      65.122  42.214  17.419  0.00  0.00
ATOM   4662 3HG2 ILE   279      65.151  41.329  17.957  0.00  0.00
ATOM   4663  CG1 ILE   279      67.184  41.665  15.647  0.00  0.00
ATOM   4664 2HG1 ILE   279      67.427  41.226  14.724  0.00  0.00
ATOM   4665 3HG1 ILE   279      66.872  42.654  15.430  0.00  0.00
ATOM   4666  CD1 ILE   279      68.423  41.751  16.449  0.00  0.00
ATOM   4667 1HD1 ILE   279      68.731  41.637  16.671  0.00  0.00
ATOM   4668 2HD1 ILE   279      68.800  41.830  16.508  0.00  0.00
ATOM   4669 3HD1 ILE   279      68.659  41.895  16.714  0.00  0.00
ATOM   4670  C   ILE   279      65.222  38.696  17.301  0.00  0.00
ATOM   4671  O   ILE   279      65.301  38.501  18.503  0.00  0.00
ATOM   4672  N   LEU   280      64.197  38.247  16.578  0.00  0.00
ATOM   4673  H   LEU   280      64.176  38.506  15.615  0.00  0.00
ATOM   4674  CA  LEU   280      63.123  37.397  17.096  0.00  0.00
ATOM   4675  HA  LEU   280      62.642  37.926  17.907  0.00  0.00
ATOM   4676  CB  LEU   280      62.097  37.178  15.973  0.00  0.00
ATOM   4677  HB2 LEU   280      61.685  38.130  15.689  0.00  0.00
ATOM   4678  HB3 LEU   280      62.624  36.789  15.122  0.00  0.00
ATOM   4679  CG  LEU   280      60.944  36.219  16.276  0.00  0.00
ATOM   4680  HG  LEU   280      61.332  35.256  16.505  0.00  0.00
ATOM   4681  CD1 LEU   280      60.091  36.661  17.428  0.00  0.00
ATOM   4682 1HD1 LEU   280      59.641  36.545  17.641  0.00  0.00
ATOM   4683 2HD1 LEU   280      60.118  36.675  17.920  0.00  0.00
ATOM   4684 3HD1 LEU   280      59.889  37.051  17.562  0.00  0.00
ATOM   4685  CD2 LEU   280      60.061  36.095  15.071  0.00  0.00
ATOM   4686 1HD2 LEU   280      60.031  35.894  14.641  0.00  0.00
ATOM   4687 2HD2 LEU   280      59.662  35.944  14.978  0.00  0.00
ATOM   4688 3HD2 LEU   280      59.842  36.336  14.708  0.00  0.00
ATOM   4689  C   LEU   280      63.655  36.080  17.677  0.00  0.00
ATOM   4690  O   LEU   280      63.312  35.725  18.793  0.00  0.00
ATOM   4691  N   ASN   281      64.522  35.373  16.958  0.00  0.00
ATOM   4692  H   ASN   281      64.789  35.717  16.063  0.00  0.00
ATOM   4693  CA  ASN   281      65.140  34.142  17.438  0.00  0.00
ATOM   4694  HA  ASN   281      64.348  33.450  17.683  0.00  0.00
ATOM   4695  CB  ASN   281      65.976  33.532  16.313  0.00  0.00
ATOM   4696  HB2 ASN   281      65.558  33.525  15.507  0.00  0.00
ATOM   4697  HB3 ASN   281      66.749  33.975  16.150  0.00  0.00
ATOM   4698  CG  ASN   281      66.344  32.318  16.466  0.00  0.00
ATOM   4699  OD1 ASN   281      66.350  31.821  16.847  0.00  0.00
ATOM   4700  ND2 ASN   281      66.672  31.816  16.166  0.00  0.00
ATOM   4701 1HD2 ASN   281      66.922  31.027  16.253  0.00  0.00
ATOM   4702 2HD2 ASN   281      66.669  32.220  15.832  0.00  0.00
ATOM   4703  C   ASN   281      65.955  34.358  18.714  0.00  0.00
ATOM   4704  O   ASN   281      65.814  33.597  19.652  0.00  0.00
ATOM   4705  N   LYS   282      66.758  35.415  18.782  0.00  0.00
ATOM   4706  H   LYS   282      66.843  35.981  17.971  0.00  0.00
ATOM   4707  CA  LYS   282      67.540  35.799  19.966  0.00  0.00
ATOM   4708  HA  LYS   282      68.159  34.965  20.260  0.00  0.00
ATOM   4709  CB  LYS   282      68.449  36.977  19.623  0.00  0.00
ATOM   4710  HB2 LYS   282      67.956  37.656  19.035  0.00  0.00
ATOM   4711  HB3 LYS   282      68.718  37.469  20.476  0.00  0.00
ATOM   4712  CG  LYS   282      69.687  36.600  18.947  0.00  0.00
ATOM   4713  HG2 LYS   282      70.255  36.139  19.593  0.00  0.00
ATOM   4714  HG3 LYS   282      69.469  35.965  18.231  0.00  0.00
ATOM   4715  CD  LYS   282      70.449  37.711  18.380  0.00  0.00
ATOM   4716  HD2 LYS   282      69.933  38.100  17.636  0.00  0.00
ATOM   4717  HD3 LYS   282      70.564  38.406  19.060  0.00  0.00
ATOM   4718  CE  LYS   282      71.776  37.362  17.928  0.00  0.00
ATOM   4719  HE2 LYS   282      72.239  37.945  17.898  0.00  0.00
ATOM   4720  HE3 LYS   282      72.139  36.885  18.399  0.00  0.00
ATOM   4721  NZ  LYS   282      72.003  36.905  16.931  0.00  0.00
ATOM   4722  HZ1 LYS   282      72.116  36.724  16.665  0.00  0.00
ATOM   4723  HZ2 LYS   282      71.981  36.804  16.727  0.00  0.00
ATOM   4724  HZ3 LYS   282      72.096  36.837  16.647  0.00  0.00
ATOM   4725  C   LYS   282      66.675  36.131  21.171  0.00  0.00
ATOM   4726  O   LYS   282      67.007  35.740  22.264  0.00  0.00
ATOM   4727  N   ALA   283      65.559  36.814  20.986  0.00  0.00
ATOM   4728  H   ALA   283      65.364  37.146  20.070  0.00  0.00
ATOM   4729  CA  ALA   283      64.607  37.096  22.050  0.00  0.00
ATOM   4730  HA  ALA   283      65.145  37.523  22.884  0.00  0.00
ATOM   4731  CB  ALA   283      63.605  38.127  21.547  0.00  0.00
ATOM   4732  HB1 ALA   283      63.240  38.218  21.296  0.00  0.00
ATOM   4733  HB2 ALA   283      63.300  38.424  21.671  0.00  0.00
ATOM   4734  HB3 ALA   283      63.561  38.502  21.328  0.00  0.00
ATOM   4735  C   ALA   283      63.900  35.828  22.558  0.00  0.00
ATOM   4736  O   ALA   283      63.811  35.636  23.759  0.00  0.00
ATOM   4737  N   LEU   284      63.444  34.949  21.675  0.00  0.00
ATOM   4738  H   LEU   284      63.537  35.167  20.711  0.00  0.00
ATOM   4739  CA  LEU   284      62.800  33.684  22.031  0.00  0.00
ATOM   4740  HA  LEU   284      61.995  33.888  22.727  0.00  0.00
ATOM   4741  CB  LEU   284      62.224  33.022  20.775  0.00  0.00
ATOM   4742  HB2 LEU   284      62.984  33.003  20.017  0.00  0.00
ATOM   4743  HB3 LEU   284      61.992  31.999  21.009  0.00  0.00
ATOM   4744  CG  LEU   284      60.962  33.665  20.201  0.00  0.00
ATOM   4745  HG  LEU   284      61.133  34.705  20.041  0.00  0.00
ATOM   4746  CD1 LEU   284      60.599  33.034  18.875  0.00  0.00
ATOM   4747 1HD1 LEU   284      60.728  32.853  18.524  0.00  0.00
ATOM   4748 2HD1 LEU   284      60.396  32.729  18.651  0.00  0.00
ATOM   4749 3HD1 LEU   284      60.416  33.060  18.482  0.00  0.00
ATOM   4750  CD2 LEU   284      59.787  33.511  21.122  0.00  0.00
ATOM   4751 1HD2 LEU   284      59.488  33.698  21.359  0.00  0.00
ATOM   4752 2HD2 LEU   284      59.392  33.385  21.187  0.00  0.00
ATOM   4753 3HD2 LEU   284      59.619  33.364  21.489  0.00  0.00
ATOM   4754  C   LEU   284      63.731  32.704  22.752  0.00  0.00
ATOM   4755  O   LEU   284      63.304  32.057  23.692  0.00  0.00
ATOM   4756  N   GLU   285      64.996  32.624  22.377  0.00  0.00
ATOM   4757  H   GLU   285      65.276  33.153  21.583  0.00  0.00
ATOM   4758  CA  GLU   285      66.001  31.793  23.046  0.00  0.00
ATOM   4759  HA  GLU   285      65.659  30.771  23.082  0.00  0.00
ATOM   4760  CB  GLU   285      67.304  31.825  22.250  0.00  0.00
ATOM   4761  HB2 GLU   285      67.353  32.224  21.619  0.00  0.00
ATOM   4762  HB3 GLU   285      67.882  32.122  22.591  0.00  0.00
ATOM   4763  CG  GLU   285      67.820  30.961  21.844  0.00  0.00
ATOM   4764  HG2 GLU   285      67.593  31.159  21.891  0.00  0.00
ATOM   4765  HG3 GLU   285      68.083  30.726  21.667  0.00  0.00
ATOM   4766  CD  GLU   285      68.320  30.158  21.599  0.00  0.00
ATOM   4767  OE1 GLU   285      68.631  29.832  21.673  0.00  0.00
ATOM   4768  OE2 GLU   285      68.420  29.845  21.320  0.00  0.00
ATOM   4769  C   GLU   285      66.249  32.218  24.494  0.00  0.00
ATOM   4770  O   GLU   285      66.408  31.374  25.350  0.00  0.00
ATOM   4771  N   LEU   286      66.249  33.513  24.783  0.00  0.00
ATOM   4772  H   LEU   286      66.104  34.148  24.038  0.00  0.00
ATOM   4773  CA  LEU   286      66.413  34.035  26.141  0.00  0.00
ATOM   4774  HA  LEU   286      67.190  33.468  26.636  0.00  0.00
ATOM   4775  CB  LEU   286      66.846  35.502  26.097  0.00  0.00
ATOM   4776  HB2 LEU   286      66.122  36.052  25.527  0.00  0.00
ATOM   4777  HB3 LEU   286      66.845  35.898  27.094  0.00  0.00
ATOM   4778  CG  LEU   286      68.229  35.750  25.498  0.00  0.00
ATOM   4779  HG  LEU   286      68.249  35.389  24.495  0.00  0.00
ATOM   4780  CD1 LEU   286      68.523  37.226  25.460  0.00  0.00
ATOM   4781 1HD1 LEU   286      68.445  37.619  25.443  0.00  0.00
ATOM   4782 2HD1 LEU   286      68.664  37.598  25.582  0.00  0.00
ATOM   4783 3HD1 LEU   286      68.664  37.536  25.314  0.00  0.00
ATOM   4784  CD2 LEU   286      69.332  35.062  26.254  0.00  0.00
ATOM   4785 1HD2 LEU   286      69.530  34.865  26.475  0.00  0.00
ATOM   4786 2HD2 LEU   286      69.637  34.845  26.353  0.00  0.00
ATOM   4787 3HD2 LEU   286      69.649  34.968  26.448  0.00  0.00
ATOM   4788  C   LEU   286      65.151  33.852  26.989  0.00  0.00
ATOM   4789  O   LEU   286      65.245  33.463  28.143  0.00  0.00
ATOM   4790  N   CYS   287      63.965  34.034  26.410  0.00  0.00
ATOM   4791  H   CYS   287      63.946  34.360  25.472  0.00  0.00
ATOM   4792  CA  CYS   287      62.699  33.750  27.083  0.00  0.00
ATOM   4793  HA  CYS   287      62.645  34.336  27.989  0.00  0.00
ATOM   4794  CB  CYS   287      61.521  34.134  26.195  0.00  0.00
ATOM   4795  HB2 CYS   287      61.579  33.642  25.262  0.00  0.00
ATOM   4796  HB3 CYS   287      60.618  33.837  26.673  0.00  0.00
ATOM   4797  SG  CYS   287      61.453  35.884  25.918  0.00  0.00
ATOM   4798  HG  CYS   287      62.417  35.964  25.235  0.00  0.00
ATOM   4799  C   CYS   287      62.574  32.282  27.507  0.00  0.00
ATOM   4800  O   CYS   287      61.998  31.996  28.539  0.00  0.00
ATOM   4801  N   GLU   288      63.131  31.342  26.749  0.00  0.00
ATOM   4802  H   GLU   288      63.573  31.625  25.908  0.00  0.00
ATOM   4803  CA  GLU   288      63.130  29.924  27.088  0.00  0.00
ATOM   4804  HA  GLU   288      62.124  29.645  27.351  0.00  0.00
ATOM   4805  CB  GLU   288      63.551  29.099  25.879  0.00  0.00
ATOM   4806  HB2 GLU   288      63.067  29.433  25.060  0.00  0.00
ATOM   4807  HB3 GLU   288      64.534  29.214  25.695  0.00  0.00
ATOM   4808  CG  GLU   288      63.288  27.686  25.978  0.00  0.00
ATOM   4809  HG2 GLU   288      63.775  27.330  26.158  0.00  0.00
ATOM   4810  HG3 GLU   288      62.857  27.487  26.439  0.00  0.00
ATOM   4811  CD  GLU   288      62.969  27.007  25.220  0.00  0.00
ATOM   4812  OE1 GLU   288      62.758  26.858  24.772  0.00  0.00
ATOM   4813  OE2 GLU   288      62.906  26.605  25.066  0.00  0.00
ATOM   4814  C   GLU   288      63.998  29.616  28.306  0.00  0.00
ATOM   4815  O   GLU   288      63.538  28.952  29.210  0.00  0.00
ATOM   4816  N   ILE   289      65.221  30.128  28.383  0.00  0.00
ATOM   4817  H   ILE   289      65.549  30.693  27.639  0.00  0.00
ATOM   4818  CA  ILE   289      66.127  29.861  29.514  0.00  0.00
ATOM   4819  HA  ILE   289      66.044  28.805  29.720  0.00  0.00
ATOM   4820  CB  ILE   289      67.590  30.116  29.109  0.00  0.00
ATOM   4821  HB  ILE   289      67.693  29.855  28.221  0.00  0.00
ATOM   4822  CG2 ILE   289      68.040  31.399  29.119  0.00  0.00
ATOM   4823 1HG2 ILE   289      68.260  31.593  29.200  0.00  0.00
ATOM   4824 2HG2 ILE   289      68.225  31.707  28.919  0.00  0.00
ATOM   4825 3HG2 ILE   289      67.995  31.826  29.209  0.00  0.00
ATOM   4826  CG1 ILE   289      68.518  29.402  29.789  0.00  0.00
ATOM   4827 2HG1 ILE   289      69.045  29.581  29.672  0.00  0.00
ATOM   4828 3HG1 ILE   289      68.517  29.512  30.345  0.00  0.00
ATOM   4829  CD1 ILE   289      68.786  28.311  29.867  0.00  0.00
ATOM   4830 1HD1 ILE   289      68.832  28.080  29.999  0.00  0.00
ATOM   4831 2HD1 ILE   289      68.865  27.975  29.823  0.00  0.00
ATOM   4832 3HD1 ILE   289      68.894  28.070  29.844  0.00  0.00
ATOM   4833  C   ILE   289      65.700  30.574  30.808  0.00  0.00
ATOM   4834  O   ILE   289      65.859  30.028  31.893  0.00  0.00
ATOM   4835  N   LEU   290      65.088  31.754  30.703  0.00  0.00
ATOM   4836  H   LEU   290      64.992  32.144  29.790  0.00  0.00
ATOM   4837  CA  LEU   290      64.433  32.430  31.820  0.00  0.00
ATOM   4838  HA  LEU   290      65.149  32.546  32.622  0.00  0.00
ATOM   4839  CB  LEU   290      63.973  33.825  31.365  0.00  0.00
ATOM   4840  HB2 LEU   290      63.436  33.724  30.435  0.00  0.00
ATOM   4841  HB3 LEU   290      63.277  34.215  32.092  0.00  0.00
ATOM   4842  CG  LEU   290      65.106  34.845  31.184  0.00  0.00
ATOM   4843  HG  LEU   290      65.935  34.384  30.674  0.00  0.00
ATOM   4844  CD1 LEU   290      64.673  36.046  30.364  0.00  0.00
ATOM   4845 1HD1 LEU   290      64.561  36.449  30.347  0.00  0.00
ATOM   4846 2HD1 LEU   290      64.738  36.336  30.048  0.00  0.00
ATOM   4847 3HD1 LEU   290      64.398  36.242  30.103  0.00  0.00
ATOM   4848  CD2 LEU   290      65.593  35.353  32.528  0.00  0.00
ATOM   4849 1HD2 LEU   290      65.882  35.552  32.756  0.00  0.00
ATOM   4850 2HD2 LEU   290      65.551  35.594  32.858  0.00  0.00
ATOM   4851 3HD2 LEU   290      65.721  35.303  32.929  0.00  0.00
ATOM   4852  C   LEU   290      63.281  31.593  32.396  0.00  0.00
ATOM   4853  O   LEU   290      63.260  31.343  33.589  0.00  0.00
ATOM   4854  N   ALA   291      62.391  31.068  31.561  0.00  0.00
ATOM   4855  H   ALA   291      62.464  31.289  30.593  0.00  0.00
ATOM   4856  CA  ALA   291      61.301  30.195  31.988  0.00  0.00
ATOM   4857  HA  ALA   291      60.783  30.682  32.800  0.00  0.00
ATOM   4858  CB  ALA   291      60.333  30.037  30.824  0.00  0.00
ATOM   4859  HB1 ALA   291      60.171  30.139  30.465  0.00  0.00
ATOM   4860  HB2 ALA   291      60.165  29.832  30.498  0.00  0.00
ATOM   4861  HB3 ALA   291      59.961  30.002  30.660  0.00  0.00
ATOM   4862  C   ALA   291      61.762  28.818  32.502  0.00  0.00
ATOM   4863  O   ALA   291      61.104  28.234  33.310  0.00  0.00
ATOM   4864  N   LYS   292      62.870  28.290  32.038  0.00  0.00
ATOM   4865  H   LYS   292      63.315  28.802  31.348  0.00  0.00
ATOM   4866  CA  LYS   292      63.342  26.923  32.295  0.00  0.00
ATOM   4867  HA  LYS   292      62.504  26.289  32.509  0.00  0.00
ATOM   4868  CB  LYS   292      64.009  26.397  31.048  0.00  0.00
ATOM   4869  HB2 LYS   292      63.508  26.606  30.255  0.00  0.00
ATOM   4870  HB3 LYS   292      64.854  26.808  30.930  0.00  0.00
ATOM   4871  CG  LYS   292      64.201  25.050  30.983  0.00  0.00
ATOM   4872  HG2 LYS   292      64.715  24.821  31.724  0.00  0.00
ATOM   4873  HG3 LYS   292      63.392  24.655  31.109  0.00  0.00
ATOM   4874  CD  LYS   292      64.787  24.525  29.736  0.00  0.00
ATOM   4875  HD2 LYS   292      65.007  24.460  29.516  0.00  0.00
ATOM   4876  HD3 LYS   292      64.875  24.307  29.547  0.00  0.00
ATOM   4877  CE  LYS   292      64.954  24.355  29.069  0.00  0.00
ATOM   4878  HE2 LYS   292      64.733  24.453  29.276  0.00  0.00
ATOM   4879  HE3 LYS   292      64.881  24.539  29.220  0.00  0.00
ATOM   4880  NZ  LYS   292      65.485  23.832  27.964  0.00  0.00
ATOM   4881  HZ1 LYS   292      65.586  23.678  27.677  0.00  0.00
ATOM   4882  HZ2 LYS   292      65.624  23.724  27.640  0.00  0.00
ATOM   4883  HZ3 LYS   292      65.646  23.709  27.758  0.00  0.00
ATOM   4884  C   LYS   292      64.257  26.809  33.492  0.00  0.00
ATOM   4885  O   LYS   292      64.168  25.817  34.184  0.00  0.00
ATOM   4886  N   GLU   293      65.118  27.781  33.745  0.00  0.00
ATOM   4887  H   GLU   293      65.135  28.539  33.108  0.00  0.00
ATOM   4888  CA  GLU   293      66.147  27.682  34.775  0.00  0.00
ATOM   4889  HA  GLU   293      65.809  27.001  35.533  0.00  0.00
ATOM   4890  CB  GLU   293      67.405  27.107  34.162  0.00  0.00
ATOM   4891  HB2 GLU   293      67.265  26.569  33.555  0.00  0.00
ATOM   4892  HB3 GLU   293      67.902  27.663  33.786  0.00  0.00
ATOM   4893  CG  GLU   293      68.213  26.511  34.840  0.00  0.00
ATOM   4894  HG2 GLU   293      68.506  26.808  35.107  0.00  0.00
ATOM   4895  HG3 GLU   293      67.892  26.373  35.201  0.00  0.00
ATOM   4896  CD  GLU   293      69.067  25.696  34.657  0.00  0.00
ATOM   4897  OE1 GLU   293      69.373  25.268  34.703  0.00  0.00
ATOM   4898  OE2 GLU   293      69.447  25.479  34.482  0.00  0.00
ATOM   4899  C   GLU   293      66.476  28.984  35.497  0.00  0.00
ATOM   4900  O   GLU   293      66.745  28.956  36.662  0.00  0.00
ATOM   4901  N   LYS   294      66.470  30.122  34.839  0.00  0.00
ATOM   4902  H   LYS   294      66.213  30.089  33.894  0.00  0.00
ATOM   4903  CA  LYS   294      67.101  31.348  35.354  0.00  0.00
ATOM   4904  HA  LYS   294      67.807  31.074  36.125  0.00  0.00
ATOM   4905  CB  LYS   294      67.902  32.039  34.240  0.00  0.00
ATOM   4906  HB2 LYS   294      67.289  32.181  33.392  0.00  0.00
ATOM   4907  HB3 LYS   294      68.203  32.994  34.579  0.00  0.00
ATOM   4908  CG  LYS   294      69.129  31.289  33.812  0.00  0.00
ATOM   4909  HG2 LYS   294      69.293  30.817  34.142  0.00  0.00
ATOM   4910  HG3 LYS   294      69.142  31.008  33.270  0.00  0.00
ATOM   4911  CD  LYS   294      70.121  31.555  33.668  0.00  0.00
ATOM   4912  HD2 LYS   294      69.824  31.688  33.367  0.00  0.00
ATOM   4913  HD3 LYS   294      70.321  31.864  33.925  0.00  0.00
ATOM   4914  CE  LYS   294      71.247  31.196  33.570  0.00  0.00
ATOM   4915  HE2 LYS   294      71.384  30.904  33.725  0.00  0.00
ATOM   4916  HE3 LYS   294      71.162  31.084  33.204  0.00  0.00
ATOM   4917  NZ  LYS   294      72.273  31.363  33.750  0.00  0.00
ATOM   4918  HZ1 LYS   294      72.550  31.420  33.784  0.00  0.00
ATOM   4919  HZ2 LYS   294      72.541  31.403  33.815  0.00  0.00
ATOM   4920  HZ3 LYS   294      72.498  31.378  33.778  0.00  0.00
ATOM   4921  C   LYS   294      66.163  32.320  36.063  0.00  0.00
ATOM   4922  O   LYS   294      66.636  33.167  36.787  0.00  0.00
ATOM   4923  N   ASP   295      64.856  32.205  35.887  0.00  0.00
ATOM   4924  H   ASP   295      64.533  31.537  35.224  0.00  0.00
ATOM   4925  CA  ASP   295      63.844  33.066  36.519  0.00  0.00
ATOM   4926  HA  ASP   295      64.187  33.301  37.517  0.00  0.00
ATOM   4927  CB  ASP   295      63.748  34.374  35.707  0.00  0.00
ATOM   4928  HB2 ASP   295      64.740  34.716  35.468  0.00  0.00
ATOM   4929  HB3 ASP   295      63.232  34.183  34.779  0.00  0.00
ATOM   4930  CG  ASP   295      63.071  35.515  36.451  0.00  0.00
ATOM   4931  OD1 ASP   295      63.289  35.676  37.655  0.00  0.00
ATOM   4932  OD2 ASP   295      62.385  36.324  35.819  0.00  0.00
ATOM   4933  C   ASP   295      62.488  32.345  36.672  0.00  0.00
ATOM   4934  O   ASP   295      61.433  32.898  36.399  0.00  0.00
ATOM   4935  N   THR   296      62.506  31.071  37.052  0.00  0.00
ATOM   4936  H   THR   296      63.389  30.695  37.313  0.00  0.00
ATOM   4937  CA  THR   296      61.364  30.135  36.992  0.00  0.00
ATOM   4938  HA  THR   296      61.059  30.064  35.958  0.00  0.00
ATOM   4939  CB  THR   296      61.759  28.725  37.437  0.00  0.00
ATOM   4940  HB  THR   296      61.026  28.181  37.577  0.00  0.00
ATOM   4941  CG2 THR   296      62.507  28.018  36.609  0.00  0.00
ATOM   4942 1HG2 THR   296      62.725  27.884  36.468  0.00  0.00
ATOM   4943 2HG2 THR   296      62.645  27.766  36.387  0.00  0.00
ATOM   4944 3HG2 THR   296      62.684  27.897  36.350  0.00  0.00
ATOM   4945  OG1 THR   296      62.379  28.702  38.453  0.00  0.00
ATOM   4946  HG1 THR   296      62.668  28.348  38.569  0.00  0.00
ATOM   4947  C   THR   296      60.107  30.551  37.756  0.00  0.00
ATOM   4948  O   THR   296      59.022  30.148  37.363  0.00  0.00
ATOM   4949  N   ILE   297      60.199  31.419  38.768  0.00  0.00
ATOM   4950  H   ILE   297      61.110  31.699  39.056  0.00  0.00
ATOM   4951  CA  ILE   297      59.049  32.047  39.434  0.00  0.00
ATOM   4952  HA  ILE   297      58.444  31.240  39.815  0.00  0.00
ATOM   4953  CB  ILE   297      59.523  32.890  40.635  0.00  0.00
ATOM   4954  HB  ILE   297      60.308  32.336  41.123  0.00  0.00
ATOM   4955  CG2 ILE   297      60.104  34.231  40.208  0.00  0.00
ATOM   4956 1HG2 ILE   297      60.315  34.397  39.717  0.00  0.00
ATOM   4957 2HG2 ILE   297      59.875  34.755  40.198  0.00  0.00
ATOM   4958 3HG2 ILE   297      60.552  34.536  40.411  0.00  0.00
ATOM   4959  CG1 ILE   297      58.435  33.137  41.677  0.00  0.00
ATOM   4960 2HG1 ILE   297      58.589  33.882  42.133  0.00  0.00
ATOM   4961 3HG1 ILE   297      57.636  33.250  41.309  0.00  0.00
ATOM   4962  CD1 ILE   297      58.210  32.268  42.650  0.00  0.00
ATOM   4963 1HD1 ILE   297      58.237  32.167  42.860  0.00  0.00
ATOM   4964 2HD1 ILE   297      58.017  32.036  42.930  0.00  0.00
ATOM   4965 3HD1 ILE   297      58.207  31.964  42.875  0.00  0.00
ATOM   4966  C   ILE   297      58.157  32.847  38.472  0.00  0.00
ATOM   4967  O   ILE   297      56.992  33.071  38.748  0.00  0.00
ATOM   4968  N   ARG   298      58.692  33.235  37.317  0.00  0.00
ATOM   4969  H   ARG   298      59.659  33.026  37.195  0.00  0.00
ATOM   4970  CA  ARG   298      58.052  33.999  36.243  0.00  0.00
ATOM   4971  HA  ARG   298      57.050  34.271  36.553  0.00  0.00
ATOM   4972  CB  ARG   298      58.859  35.296  36.029  0.00  0.00
ATOM   4973  HB2 ARG   298      59.903  35.108  36.193  0.00  0.00
ATOM   4974  HB3 ARG   298      58.754  35.643  35.020  0.00  0.00
ATOM   4975  CG  ARG   298      58.376  36.423  36.932  0.00  0.00
ATOM   4976  HG2 ARG   298      57.424  36.755  36.572  0.00  0.00
ATOM   4977  HG3 ARG   298      58.255  36.074  37.940  0.00  0.00
ATOM   4978  CD  ARG   298      59.339  37.605  36.920  0.00  0.00
ATOM   4979  HD2 ARG   298      59.622  37.825  35.902  0.00  0.00
ATOM   4980  HD3 ARG   298      58.836  38.482  37.300  0.00  0.00
ATOM   4981  NE  ARG   298      60.545  37.333  37.708  0.00  0.00
ATOM   4982  HE  ARG   298      61.316  36.954  37.200  0.00  0.00
ATOM   4983  CZ  ARG   298      60.734  37.456  38.998  0.00  0.00
ATOM   4984  NH1 ARG   298      59.821  37.882  39.807  0.00  0.00
ATOM   4985 1HH1 ARG   298      58.921  38.114  39.455  0.00  0.00
ATOM   4986 2HH1 ARG   298      59.975  37.878  40.787  0.00  0.00
ATOM   4987  NH2 ARG   298      61.854  37.119  39.509  0.00  0.00
ATOM   4988 1HH2 ARG   298      62.527  36.678  38.917  0.00  0.00
ATOM   4989 2HH2 ARG   298      62.053  37.339  40.456  0.00  0.00
ATOM   4990  C   ARG   298      57.860  33.196  34.953  0.00  0.00
ATOM   4991  O   ARG   298      57.634  33.776  33.909  0.00  0.00
ATOM   4992  N   LYS   299      57.926  31.866  34.995  0.00  0.00
ATOM   4993  H   LYS   299      58.089  31.439  35.880  0.00  0.00
ATOM   4994  CA  LYS   299      57.718  30.994  33.826  0.00  0.00
ATOM   4995  HA  LYS   299      58.496  31.240  33.119  0.00  0.00
ATOM   4996  CB  LYS   299      57.883  29.517  34.192  0.00  0.00
ATOM   4997  HB2 LYS   299      57.945  28.952  33.279  0.00  0.00
ATOM   4998  HB3 LYS   299      58.816  29.381  34.710  0.00  0.00
ATOM   4999  CG  LYS   299      56.762  28.943  35.041  0.00  0.00
ATOM   5000  HG2 LYS   299      56.670  29.470  35.909  0.00  0.00
ATOM   5001  HG3 LYS   299      55.873  29.011  34.536  0.00  0.00
ATOM   5002  CD  LYS   299      56.953  27.534  35.398  0.00  0.00
ATOM   5003  HD2 LYS   299      57.053  26.998  34.596  0.00  0.00
ATOM   5004  HD3 LYS   299      57.791  27.452  35.900  0.00  0.00
ATOM   5005  CE  LYS   299      55.888  26.960  36.194  0.00  0.00
ATOM   5006  HE2 LYS   299      56.178  26.275  36.653  0.00  0.00
ATOM   5007  HE3 LYS   299      55.543  27.543  36.816  0.00  0.00
ATOM   5008  NZ  LYS   299      54.939  26.552  35.564  0.00  0.00
ATOM   5009  HZ1 LYS   299      54.686  26.283  35.491  0.00  0.00
ATOM   5010  HZ2 LYS   299      54.571  26.535  35.483  0.00  0.00
ATOM   5011  HZ3 LYS   299      54.840  26.510  35.249  0.00  0.00
ATOM   5012  C   LYS   299      56.408  31.256  33.077  0.00  0.00
ATOM   5013  O   LYS   299      56.402  31.223  31.862  0.00  0.00
ATOM   5014  N   GLU   300      55.333  31.589  33.774  0.00  0.00
ATOM   5015  H   GLU   300      55.421  31.623  34.766  0.00  0.00
ATOM   5016  CA  GLU   300      54.037  31.925  33.174  0.00  0.00
ATOM   5017  HA  GLU   300      53.775  31.165  32.448  0.00  0.00
ATOM   5018  CB  GLU   300      52.948  31.977  34.243  0.00  0.00
ATOM   5019  HB2 GLU   300      53.178  32.770  34.934  0.00  0.00
ATOM   5020  HB3 GLU   300      52.023  32.237  33.758  0.00  0.00
ATOM   5021  CG  GLU   300      52.726  30.690  35.035  0.00  0.00
ATOM   5022  HG2 GLU   300      53.608  30.444  35.594  0.00  0.00
ATOM   5023  HG3 GLU   300      51.931  30.840  35.742  0.00  0.00
ATOM   5024  CD  GLU   300      52.368  29.516  34.142  0.00  0.00
ATOM   5025  OE1 GLU   300      53.197  28.633  33.927  0.00  0.00
ATOM   5026  OE2 GLU   300      51.272  29.491  33.595  0.00  0.00
ATOM   5027  C   GLU   300      54.066  33.259  32.410  0.00  0.00
ATOM   5028  O   GLU   300      53.475  33.370  31.357  0.00  0.00
ATOM   5029  N   TYR   301      54.789  34.254  32.915  0.00  0.00
ATOM   5030  H   TYR   301      55.247  34.092  33.775  0.00  0.00
ATOM   5031  CA  TYR   301      55.046  35.529  32.245  0.00  0.00
ATOM   5032  HA  TYR   301      54.110  35.916  31.859  0.00  0.00
ATOM   5033  CB  TYR   301      55.587  36.533  33.271  0.00  0.00
ATOM   5034  HB2 TYR   301      54.783  36.795  33.940  0.00  0.00
ATOM   5035  HB3 TYR   301      56.339  36.050  33.877  0.00  0.00
ATOM   5036  CG  TYR   301      56.173  37.809  32.701  0.00  0.00
ATOM   5037  CD1 TYR   301      55.338  38.797  32.184  0.00  0.00
ATOM   5038  HD1 TYR   301      54.287  38.637  32.180  0.00  0.00
ATOM   5039  CE1 TYR   301      55.877  39.971  31.642  0.00  0.00
ATOM   5040  HE1 TYR   301      55.243  40.716  31.224  0.00  0.00
ATOM   5041  CZ  TYR   301      57.252  40.160  31.611  0.00  0.00
ATOM   5042  OH  TYR   301      57.768  41.289  31.083  0.00  0.00
ATOM   5043  HH  TYR   301      57.093  41.864  30.760  0.00  0.00
ATOM   5044  CE2 TYR   301      58.087  39.172  32.133  0.00  0.00
ATOM   5045  HE2 TYR   301      59.138  39.312  32.092  0.00  0.00
ATOM   5046  CD2 TYR   301      57.550  38.002  32.676  0.00  0.00
ATOM   5047  HD2 TYR   301      58.197  37.244  33.052  0.00  0.00
ATOM   5048  C   TYR   301      56.007  35.365  31.063  0.00  0.00
ATOM   5049  O   TYR   301      55.699  35.804  29.962  0.00  0.00
ATOM   5050  N   TRP   302      57.137  34.675  31.231  0.00  0.00
ATOM   5051  H   TRP   302      57.369  34.369  32.152  0.00  0.00
ATOM   5052  CA  TRP   302      58.095  34.443  30.145  0.00  0.00
ATOM   5053  HA  TRP   302      58.329  35.406  29.707  0.00  0.00
ATOM   5054  CB  TRP   302      59.407  33.889  30.710  0.00  0.00
ATOM   5055  HB2 TRP   302      59.200  33.010  31.300  0.00  0.00
ATOM   5056  HB3 TRP   302      60.041  33.593  29.891  0.00  0.00
ATOM   5057  CG  TRP   302      60.171  34.871  31.535  0.00  0.00
ATOM   5058  CD1 TRP   302      60.546  34.709  32.818  0.00  0.00
ATOM   5059  HD1 TRP   302      60.362  33.836  33.404  0.00  0.00
ATOM   5060  NE1 TRP   302      61.210  35.836  33.249  0.00  0.00
ATOM   5061  HE1 TRP   302      61.583  35.937  34.169  0.00  0.00
ATOM   5062  CE2 TRP   302      61.307  36.773  32.260  0.00  0.00
ATOM   5063  CZ2 TRP   302      61.897  38.033  32.211  0.00  0.00
ATOM   5064  HZ2 TRP   302      62.370  38.440  33.079  0.00  0.00
ATOM   5065  CH2 TRP   302      61.864  38.755  31.016  0.00  0.00
ATOM   5066  HH2 TRP   302      62.303  39.726  30.955  0.00  0.00
ATOM   5067  CZ3 TRP   302      61.257  38.194  29.888  0.00  0.00
ATOM   5068  HZ3 TRP   302      61.249  38.740  28.973  0.00  0.00
ATOM   5069  CE3 TRP   302      60.685  36.917  29.945  0.00  0.00
ATOM   5070  HE3 TRP   302      60.248  36.490  29.069  0.00  0.00
ATOM   5071  CD2 TRP   302      60.674  36.182  31.140  0.00  0.00
ATOM   5072  C   TRP   302      57.533  33.605  28.995  0.00  0.00
ATOM   5073  O   TRP   302      57.886  33.845  27.848  0.00  0.00
ATOM   5074  N   ARG   303      56.591  32.691  29.253  0.00  0.00
ATOM   5075  H   ARG   303      56.393  32.483  30.208  0.00  0.00
ATOM   5076  CA  ARG   303      55.812  32.012  28.208  0.00  0.00
ATOM   5077  HA  ARG   303      56.509  31.672  27.451  0.00  0.00
ATOM   5078  CB  ARG   303      55.113  30.777  28.787  0.00  0.00
ATOM   5079  HB2 ARG   303      55.671  30.315  29.387  0.00  0.00
ATOM   5080  HB3 ARG   303      54.340  31.012  29.272  0.00  0.00
ATOM   5081  CG  ARG   303      54.746  29.828  27.871  0.00  0.00
ATOM   5082  HG2 ARG   303      54.179  30.286  27.316  0.00  0.00
ATOM   5083  HG3 ARG   303      55.476  29.635  27.394  0.00  0.00
ATOM   5084  CD  ARG   303      54.159  28.521  28.321  0.00  0.00
ATOM   5085  HD2 ARG   303      53.903  27.968  27.455  0.00  0.00
ATOM   5086  HD3 ARG   303      54.899  27.959  28.845  0.00  0.00
ATOM   5087  NE  ARG   303      52.946  28.694  29.105  0.00  0.00
ATOM   5088  HE  ARG   303      52.125  28.873  28.599  0.00  0.00
ATOM   5089  CZ  ARG   303      52.806  28.718  30.405  0.00  0.00
ATOM   5090  NH1 ARG   303      51.661  28.980  30.899  0.00  0.00
ATOM   5091 1HH1 ARG   303      50.911  29.154  30.300  0.00  0.00
ATOM   5092 2HH1 ARG   303      51.530  29.044  31.877  0.00  0.00
ATOM   5093  NH2 ARG   303      53.750  28.508  31.231  0.00  0.00
ATOM   5094 1HH2 ARG   303      54.643  28.254  30.900  0.00  0.00
ATOM   5095 2HH2 ARG   303      53.555  28.502  32.208  0.00  0.00
ATOM   5096  C   ARG   303      54.836  32.948  27.500  0.00  0.00
ATOM   5097  O   ARG   303      54.748  32.908  26.287  0.00  0.00
ATOM   5098  N   TYR   304      54.145  33.827  28.218  0.00  0.00
ATOM   5099  H   TYR   304      54.238  33.796  29.210  0.00  0.00
ATOM   5100  CA  TYR   304      53.314  34.887  27.628  0.00  0.00
ATOM   5101  HA  TYR   304      52.575  34.432  26.982  0.00  0.00
ATOM   5102  CB  TYR   304      52.562  35.648  28.731  0.00  0.00
ATOM   5103  HB2 TYR   304      51.774  35.021  29.108  0.00  0.00
ATOM   5104  HB3 TYR   304      53.227  35.851  29.551  0.00  0.00
ATOM   5105  CG  TYR   304      51.956  36.953  28.280  0.00  0.00
ATOM   5106  CD1 TYR   304      50.742  36.972  27.597  0.00  0.00
ATOM   5107  HD1 TYR   304      50.228  36.060  27.425  0.00  0.00
ATOM   5108  CE1 TYR   304      50.226  38.175  27.102  0.00  0.00
ATOM   5109  HE1 TYR   304      49.300  38.197  26.576  0.00  0.00
ATOM   5110  CZ  TYR   304      50.919  39.367  27.290  0.00  0.00
ATOM   5111  OH  TYR   304      50.448  40.533  26.811  0.00  0.00
ATOM   5112  HH  TYR   304      49.666  40.434  26.307  0.00  0.00
ATOM   5113  CE2 TYR   304      52.123  39.352  27.993  0.00  0.00
ATOM   5114  HE2 TYR   304      52.655  40.262  28.134  0.00  0.00
ATOM   5115  CD2 TYR   304      52.640  38.149  28.493  0.00  0.00
ATOM   5116  HD2 TYR   304      53.562  38.154  29.029  0.00  0.00
ATOM   5117  C   TYR   304      54.129  35.849  26.743  0.00  0.00
ATOM   5118  O   TYR   304      53.695  36.164  25.645  0.00  0.00
ATOM   5119  N   ILE   305      55.327  36.269  27.159  0.00  0.00
ATOM   5120  H   ILE   305      55.602  36.038  28.089  0.00  0.00
ATOM   5121  CA  ILE   305      56.243  37.067  26.325  0.00  0.00
ATOM   5122  HA  ILE   305      55.702  37.935  25.966  0.00  0.00
ATOM   5123  CB  ILE   305      57.445  37.581  27.148  0.00  0.00
ATOM   5124  HB  ILE   305      57.923  36.726  27.593  0.00  0.00
ATOM   5125  CG2 ILE   305      58.493  38.260  26.269  0.00  0.00
ATOM   5126 1HG2 ILE   305      58.494  38.671  25.944  0.00  0.00
ATOM   5127 2HG2 ILE   305      58.981  38.497  26.361  0.00  0.00
ATOM   5128 3HG2 ILE   305      58.801  38.106  25.875  0.00  0.00
ATOM   5129  CG1 ILE   305      57.048  38.527  28.292  0.00  0.00
ATOM   5130 2HG1 ILE   305      56.425  38.010  28.977  0.00  0.00
ATOM   5131 3HG1 ILE   305      57.929  38.790  28.832  0.00  0.00
ATOM   5132  CD1 ILE   305      56.350  39.804  27.892  0.00  0.00
ATOM   5133 1HD1 ILE   305      56.371  40.231  27.827  0.00  0.00
ATOM   5134 2HD1 ILE   305      56.118  40.028  27.611  0.00  0.00
ATOM   5135 3HD1 ILE   305      56.044  40.111  27.974  0.00  0.00
ATOM   5136  C   ILE   305      56.671  36.290  25.072  0.00  0.00
ATOM   5137  O   ILE   305      56.617  36.827  23.981  0.00  0.00
ATOM   5138  N   GLY   306      56.997  35.004  25.194  0.00  0.00
ATOM   5139  H   GLY   306      57.048  34.621  26.112  0.00  0.00
ATOM   5140  CA  GLY   306      57.282  34.124  24.063  0.00  0.00
ATOM   5141  HA2 GLY   306      58.165  34.477  23.558  0.00  0.00
ATOM   5142  HA3 GLY   306      57.477  33.132  24.426  0.00  0.00
ATOM   5143  C   GLY   306      56.145  34.051  23.049  0.00  0.00
ATOM   5144  O   GLY   306      56.342  34.289  21.871  0.00  0.00
ATOM   5145  N   ARG   307      54.924  33.805  23.507  0.00  0.00
ATOM   5146  H   ARG   307      54.842  33.607  24.476  0.00  0.00
ATOM   5147  CA  ARG   307      53.698  33.819  22.692  0.00  0.00
ATOM   5148  HA  ARG   307      53.854  33.166  21.843  0.00  0.00
ATOM   5149  CB  ARG   307      52.524  33.284  23.519  0.00  0.00
ATOM   5150  HB2 ARG   307      52.636  33.219  24.263  0.00  0.00
ATOM   5151  HB3 ARG   307      51.889  33.717  23.523  0.00  0.00
ATOM   5152  CG  ARG   307      52.005  32.264  23.361  0.00  0.00
ATOM   5153  HG2 ARG   307      52.101  32.504  23.544  0.00  0.00
ATOM   5154  HG3 ARG   307      51.706  31.879  23.159  0.00  0.00
ATOM   5155  CD  ARG   307      51.754  31.433  23.250  0.00  0.00
ATOM   5156  HD2 ARG   307      52.111  31.151  23.054  0.00  0.00
ATOM   5157  HD3 ARG   307      51.844  31.479  23.681  0.00  0.00
ATOM   5158  NE  ARG   307      50.926  30.932  22.844  0.00  0.00
ATOM   5159  HE  ARG   307      50.383  30.972  22.688  0.00  0.00
ATOM   5160  CZ  ARG   307      50.818  30.456  22.694  0.00  0.00
ATOM   5161  NH1 ARG   307      50.048  30.099  22.345  0.00  0.00
ATOM   5162 1HH1 ARG   307      49.535  30.173  22.190  0.00  0.00
ATOM   5163 2HH1 ARG   307      49.970  29.727  22.217  0.00  0.00
ATOM   5164  NH2 ARG   307      51.461  30.311  22.874  0.00  0.00
ATOM   5165 1HH2 ARG   307      52.060  30.537  23.113  0.00  0.00
ATOM   5166 2HH2 ARG   307      51.339  29.961  22.742  0.00  0.00
ATOM   5167  C   ARG   307      53.383  35.192  22.096  0.00  0.00
ATOM   5168  O   ARG   307      52.920  35.273  20.977  0.00  0.00
ATOM   5169  N   SER   308      53.676  36.276  22.800  0.00  0.00
ATOM   5170  H   SER   308      54.027  36.125  23.716  0.00  0.00
ATOM   5171  CA  SER   308      53.526  37.661  22.333  0.00  0.00
ATOM   5172  HA  SER   308      52.527  37.790  21.940  0.00  0.00
ATOM   5173  CB  SER   308      53.680  38.651  23.478  0.00  0.00
ATOM   5174  HB2 SER   308      54.632  38.549  23.931  0.00  0.00
ATOM   5175  HB3 SER   308      53.605  39.635  23.095  0.00  0.00
ATOM   5176  OG  SER   308      52.694  38.478  24.429  0.00  0.00
ATOM   5177  HG  SER   308      52.913  37.741  24.949  0.00  0.00
ATOM   5178  C   SER   308      54.512  38.014  21.223  0.00  0.00
ATOM   5179  O   SER   308      54.112  38.607  20.237  0.00  0.00
ATOM   5180  N   LEU   309      55.774  37.595  21.333  0.00  0.00
ATOM   5181  H   LEU   309      56.040  37.144  22.181  0.00  0.00
ATOM   5182  CA  LEU   309      56.787  37.707  20.280  0.00  0.00
ATOM   5183  HA  LEU   309      56.876  38.743  19.982  0.00  0.00
ATOM   5184  CB  LEU   309      58.140  37.208  20.816  0.00  0.00
ATOM   5185  HB2 LEU   309      57.987  36.273  21.312  0.00  0.00
ATOM   5186  HB3 LEU   309      58.790  37.027  19.991  0.00  0.00
ATOM   5187  CG  LEU   309      58.866  38.140  21.784  0.00  0.00
ATOM   5188  HG  LEU   309      58.195  38.485  22.525  0.00  0.00
ATOM   5189  CD1 LEU   309      59.998  37.441  22.477  0.00  0.00
ATOM   5190 1HD1 LEU   309      60.695  37.102  21.783  0.00  0.00
ATOM   5191 2HD1 LEU   309      60.498  38.080  23.153  0.00  0.00
ATOM   5192 3HD1 LEU   309      59.629  36.627  23.005  0.00  0.00
ATOM   5193  CD2 LEU   309      59.439  39.330  21.099  0.00  0.00
ATOM   5194 1HD2 LEU   309      59.427  39.620  20.873  0.00  0.00
ATOM   5195 2HD2 LEU   309      59.597  39.698  21.076  0.00  0.00
ATOM   5196 3HD2 LEU   309      59.684  39.542  20.869  0.00  0.00
ATOM   5197  C   LEU   309      56.385  36.931  19.021  0.00  0.00
ATOM   5198  O   LEU   309      56.519  37.446  17.931  0.00  0.00
ATOM   5199  N   GLN   310      55.819  35.744  19.171  0.00  0.00
ATOM   5200  H   GLN   310      55.785  35.378  20.091  0.00  0.00
ATOM   5201  CA  GLN   310      55.225  34.952  18.087  0.00  0.00
ATOM   5202  HA  GLN   310      55.898  34.967  17.246  0.00  0.00
ATOM   5203  CB  GLN   310      55.093  33.505  18.548  0.00  0.00
ATOM   5204  HB2 GLN   310      54.557  33.481  19.464  0.00  0.00
ATOM   5205  HB3 GLN   310      54.535  32.946  17.829  0.00  0.00
ATOM   5206  CG  GLN   310      56.422  32.810  18.734  0.00  0.00
ATOM   5207  HG2 GLN   310      56.934  32.788  17.812  0.00  0.00
ATOM   5208  HG3 GLN   310      57.027  33.351  19.413  0.00  0.00
ATOM   5209  CD  GLN   310      56.283  31.418  19.242  0.00  0.00
ATOM   5210  OE1 GLN   310      55.827  31.016  19.834  0.00  0.00
ATOM   5211  NE2 GLN   310      56.668  30.644  19.027  0.00  0.00
ATOM   5212 1HE2 GLN   310      56.595  29.745  19.369  0.00  0.00
ATOM   5213 2HE2 GLN   310      57.041  30.948  18.525  0.00  0.00
ATOM   5214  C   GLN   310      53.889  35.499  17.568  0.00  0.00
ATOM   5215  O   GLN   310      53.323  34.923  16.689  0.00  0.00
ATOM   5216  N   SER   311      53.379  36.593  18.093  0.00  0.00
ATOM   5217  H   SER   311      53.880  37.000  18.825  0.00  0.00
ATOM   5218  CA  SER   311      52.135  37.259  17.687  0.00  0.00
ATOM   5219  HA  SER   311      51.729  36.754  16.827  0.00  0.00
ATOM   5220  CB  SER   311      51.108  37.177  18.797  0.00  0.00
ATOM   5221  HB2 SER   311      51.425  37.734  19.627  0.00  0.00
ATOM   5222  HB3 SER   311      50.190  37.583  18.466  0.00  0.00
ATOM   5223  OG  SER   311      50.882  35.887  19.197  0.00  0.00
ATOM   5224  HG  SER   311      51.564  35.651  19.666  0.00  0.00
ATOM   5225  C   SER   311      52.354  38.712  17.268  0.00  0.00
ATOM   5226  O   SER   311      51.465  39.449  17.174  0.00  0.00
ATOM   5227  N   LYS   312      53.538  39.133  17.015  0.00  0.00
ATOM   5228  H   LYS   312      54.204  38.466  17.088  0.00  0.00
ATOM   5229  CA  LYS   312      53.965  40.491  16.670  0.00  0.00
ATOM   5230  HA  LYS   312      53.188  41.164  16.935  0.00  0.00
ATOM   5231  CB  LYS   312      55.200  40.834  17.467  0.00  0.00
ATOM   5232  HB2 LYS   312      55.098  40.499  18.382  0.00  0.00
ATOM   5233  HB3 LYS   312      55.987  40.379  17.084  0.00  0.00
ATOM   5234  CG  LYS   312      55.531  42.231  17.566  0.00  0.00
ATOM   5235  HG2 LYS   312      55.940  42.504  17.098  0.00  0.00
ATOM   5236  HG3 LYS   312      54.999  42.551  17.483  0.00  0.00
ATOM   5237  CD  LYS   312      56.062  42.817  18.388  0.00  0.00
ATOM   5238  HD2 LYS   312      55.974  42.790  18.869  0.00  0.00
ATOM   5239  HD3 LYS   312      56.357  42.477  18.173  0.00  0.00
ATOM   5240  CE  LYS   312      56.339  43.887  18.846  0.00  0.00
ATOM   5241  HE2 LYS   312      56.975  43.816  19.122  0.00  0.00
ATOM   5242  HE3 LYS   312      56.431  44.219  18.186  0.00  0.00
ATOM   5243  NZ  LYS   312      55.671  44.586  19.780  0.00  0.00
ATOM   5244  HZ1 LYS   312      55.606  44.787  19.909  0.00  0.00
ATOM   5245  HZ2 LYS   312      55.378  44.796  20.047  0.00  0.00
ATOM   5246  HZ3 LYS   312      55.542  44.712  20.085  0.00  0.00
ATOM   5247  C   LYS   312      54.181  40.658  15.214  0.00  0.00
ATOM   5248  O   LYS   312      54.878  39.886  14.628  0.00  0.00
ATOM   5249  OXT LYS   312      53.632  41.552  14.663  0.00  0.00
ATOM   5250  N   LEU   313      55.090  19.966  51.376  0.00  0.00
ATOM   5251  H1  LEU   313      54.846  19.707  51.517  0.00  0.00
ATOM   5252  H2  LEU   313      55.084  19.601  51.411  0.00  0.00
ATOM   5253  H3  LEU   313      54.868  19.668  51.236  0.00  0.00
ATOM   5254  CA  LEU   313      55.725  21.264  51.324  0.00  0.00
ATOM   5255  HA  LEU   313      54.960  21.982  51.137  0.00  0.00
ATOM   5256  CB  LEU   313      56.378  21.606  52.665  0.00  0.00
ATOM   5257  HB2 LEU   313      55.698  21.420  53.435  0.00  0.00
ATOM   5258  HB3 LEU   313      57.187  20.976  52.823  0.00  0.00
ATOM   5259  CG  LEU   313      56.845  22.995  52.841  0.00  0.00
ATOM   5260  HG  LEU   313      57.074  23.130  52.330  0.00  0.00
ATOM   5261  CD1 LEU   313      56.333  23.856  53.103  0.00  0.00
ATOM   5262 1HD1 LEU   313      56.132  24.303  53.258  0.00  0.00
ATOM   5263 2HD1 LEU   313      56.156  23.937  53.169  0.00  0.00
ATOM   5264 3HD1 LEU   313      56.348  23.975  53.067  0.00  0.00
ATOM   5265  CD2 LEU   313      57.533  23.388  53.501  0.00  0.00
ATOM   5266 1HD2 LEU   313      57.652  23.577  53.790  0.00  0.00
ATOM   5267 2HD2 LEU   313      57.579  23.123  53.556  0.00  0.00
ATOM   5268 3HD2 LEU   313      57.871  23.762  53.629  0.00  0.00
ATOM   5269  C   LEU   313      56.664  21.288  50.142  0.00  0.00
ATOM   5270  O   LEU   313      57.822  20.958  50.256  0.00  0.00
ATOM   5271  N   TYR   314      56.162  21.649  48.976  0.00  0.00
ATOM   5272  H   TYR   314      55.251  22.027  48.969  0.00  0.00
ATOM   5273  CA  TYR   314      56.881  21.597  47.703  0.00  0.00
ATOM   5274  HA  TYR   314      57.286  20.608  47.579  0.00  0.00
ATOM   5275  CB  TYR   314      55.869  21.836  46.588  0.00  0.00
ATOM   5276  HB2 TYR   314      55.086  21.119  46.671  0.00  0.00
ATOM   5277  HB3 TYR   314      55.429  22.786  46.742  0.00  0.00
ATOM   5278  CG  TYR   314      56.377  21.764  45.190  0.00  0.00
ATOM   5279  CD1 TYR   314      56.976  20.632  44.724  0.00  0.00
ATOM   5280  HD1 TYR   314      57.102  19.830  45.365  0.00  0.00
ATOM   5281  CE1 TYR   314      57.407  20.552  43.423  0.00  0.00
ATOM   5282  HE1 TYR   314      57.875  19.696  43.064  0.00  0.00
ATOM   5283  CZ  TYR   314      57.217  21.600  42.578  0.00  0.00
ATOM   5284  OH  TYR   314      57.634  21.540  41.325  0.00  0.00
ATOM   5285  HH  TYR   314      58.055  20.760  41.142  0.00  0.00
ATOM   5286  CE2 TYR   314      56.611  22.725  43.036  0.00  0.00
ATOM   5287  HE2 TYR   314      56.477  23.523  42.387  0.00  0.00
ATOM   5288  CD2 TYR   314      56.194  22.803  44.342  0.00  0.00
ATOM   5289  HD2 TYR   314      55.716  23.658  44.688  0.00  0.00
ATOM   5290  C   TYR   314      58.063  22.575  47.634  0.00  0.00
ATOM   5291  O   TYR   314      59.094  22.264  47.059  0.00  0.00
ATOM   5292  N   SER   315      57.961  23.718  48.296  0.00  0.00
ATOM   5293  H   SER   315      57.061  23.954  48.652  0.00  0.00
ATOM   5294  CA  SER   315      59.032  24.706  48.463  0.00  0.00
ATOM   5295  HA  SER   315      59.411  24.956  47.486  0.00  0.00
ATOM   5296  CB  SER   315      58.462  25.979  49.075  0.00  0.00
ATOM   5297  HB2 SER   315      58.241  25.871  49.974  0.00  0.00
ATOM   5298  HB3 SER   315      59.081  26.682  49.043  0.00  0.00
ATOM   5299  OG  SER   315      57.432  26.408  48.537  0.00  0.00
ATOM   5300  HG  SER   315      56.866  26.323  48.672  0.00  0.00
ATOM   5301  C   SER   315      60.242  24.244  49.281  0.00  0.00
ATOM   5302  O   SER   315      61.246  24.922  49.318  0.00  0.00
ATOM   5303  N   LEU   316      60.194  23.099  49.953  0.00  0.00
ATOM   5304  H   LEU   316      59.372  22.544  49.886  0.00  0.00
ATOM   5305  CA  LEU   316      61.308  22.565  50.748  0.00  0.00
ATOM   5306  HA  LEU   316      61.749  23.394  51.279  0.00  0.00
ATOM   5307  CB  LEU   316      60.757  21.565  51.770  0.00  0.00
ATOM   5308  HB2 LEU   316      59.907  21.999  52.233  0.00  0.00
ATOM   5309  HB3 LEU   316      60.415  20.710  51.247  0.00  0.00
ATOM   5310  CG  LEU   316      61.686  21.108  52.886  0.00  0.00
ATOM   5311  HG  LEU   316      62.525  20.644  52.466  0.00  0.00
ATOM   5312  CD1 LEU   316      62.147  22.212  53.745  0.00  0.00
ATOM   5313 1HD1 LEU   316      61.987  22.518  54.066  0.00  0.00
ATOM   5314 2HD1 LEU   316      62.465  22.291  54.099  0.00  0.00
ATOM   5315 3HD1 LEU   316      62.342  22.618  53.700  0.00  0.00
ATOM   5316  CD2 LEU   316      61.013  20.112  53.760  0.00  0.00
ATOM   5317 1HD2 LEU   316      60.722  19.733  53.751  0.00  0.00
ATOM   5318 2HD2 LEU   316      61.105  19.773  54.063  0.00  0.00
ATOM   5319 3HD2 LEU   316      60.725  20.082  54.092  0.00  0.00
ATOM   5320  C   LEU   316      62.419  21.937  49.889  0.00  0.00
ATOM   5321  O   LEU   316      63.511  21.782  50.349  0.00  0.00
ATOM   5322  N   ARG   317      62.152  21.571  48.653  0.00  0.00
ATOM   5323  H   ARG   317      61.235  21.737  48.351  0.00  0.00
ATOM   5324  CA  ARG   317      63.053  20.833  47.763  0.00  0.00
ATOM   5325  HA  ARG   317      63.374  19.954  48.303  0.00  0.00
ATOM   5326  CB  ARG   317      62.261  20.348  46.546  0.00  0.00
ATOM   5327  HB2 ARG   317      62.821  19.589  46.035  0.00  0.00
ATOM   5328  HB3 ARG   317      61.344  19.898  46.890  0.00  0.00
ATOM   5329  CG  ARG   317      61.932  21.430  45.528  0.00  0.00
ATOM   5330  HG2 ARG   317      61.549  22.294  46.037  0.00  0.00
ATOM   5331  HG3 ARG   317      62.837  21.717  45.026  0.00  0.00
ATOM   5332  CD  ARG   317      60.915  20.958  44.495  0.00  0.00
ATOM   5333  HD2 ARG   317      61.244  20.033  44.066  0.00  0.00
ATOM   5334  HD3 ARG   317      59.975  20.782  44.981  0.00  0.00
ATOM   5335  NE  ARG   317      60.753  21.934  43.416  0.00  0.00
ATOM   5336  HE  ARG   317      61.118  21.688  42.528  0.00  0.00
ATOM   5337  CZ  ARG   317      60.142  23.086  43.444  0.00  0.00
ATOM   5338  NH1 ARG   317      59.526  23.535  44.480  0.00  0.00
ATOM   5339 1HH1 ARG   317      59.447  22.960  45.280  0.00  0.00
ATOM   5340 2HH1 ARG   317      59.024  24.387  44.424  0.00  0.00
ATOM   5341  NH2 ARG   317      60.160  23.811  42.388  0.00  0.00
ATOM   5342 1HH2 ARG   317      60.639  23.479  41.584  0.00  0.00
ATOM   5343 2HH2 ARG   317      59.719  24.688  42.394  0.00  0.00
ATOM   5344  C   ARG   317      64.308  21.617  47.352  0.00  0.00
ATOM   5345  O   ARG   317      64.219  22.832  47.208  0.00  0.00
ATOM   5346  N   PRO   318      65.454  20.968  47.076  0.00  0.00
ATOM   5347  CD  PRO   318      65.699  19.566  47.299  0.00  0.00
ATOM   5348  HD2 PRO   318      65.148  18.983  46.613  0.00  0.00
ATOM   5349  HD3 PRO   318      65.447  19.286  48.284  0.00  0.00
ATOM   5350  CG  PRO   318      67.152  19.355  47.086  0.00  0.00
ATOM   5351  HG2 PRO   318      67.300  18.501  46.573  0.00  0.00
ATOM   5352  HG3 PRO   318      67.631  19.321  47.963  0.00  0.00
ATOM   5353  CB  PRO   318      67.651  20.490  46.320  0.00  0.00
ATOM   5354  HB2 PRO   318      67.635  20.245  45.322  0.00  0.00
ATOM   5355  HB3 PRO   318      68.611  20.725  46.605  0.00  0.00
ATOM   5356  CA  PRO   318      66.682  21.616  46.613  0.00  0.00
ATOM   5357  HA  PRO   318      67.074  22.186  47.434  0.00  0.00
ATOM   5358  C   PRO   318      66.540  22.574  45.428  0.00  0.00
ATOM   5359  O   PRO   318      67.162  23.621  45.427  0.00  0.00
ATOM   5360  N   GLU   319      65.683  22.261  44.460  0.00  0.00
ATOM   5361  H   GLU   319      65.275  21.350  44.488  0.00  0.00
ATOM   5362  CA  GLU   319      65.371  23.105  43.300  0.00  0.00
ATOM   5363  HA  GLU   319      66.295  23.299  42.773  0.00  0.00
ATOM   5364  CB  GLU   319      64.448  22.314  42.374  0.00  0.00
ATOM   5365  HB2 GLU   319      64.911  21.389  42.134  0.00  0.00
ATOM   5366  HB3 GLU   319      63.545  22.093  42.891  0.00  0.00
ATOM   5367  CG  GLU   319      64.084  22.974  41.078  0.00  0.00
ATOM   5368  HG2 GLU   319      63.674  23.902  41.269  0.00  0.00
ATOM   5369  HG3 GLU   319      64.939  23.108  40.510  0.00  0.00
ATOM   5370  CD  GLU   319      63.078  22.182  40.301  0.00  0.00
ATOM   5371  OE1 GLU   319      62.943  21.666  39.767  0.00  0.00
ATOM   5372  OE2 GLU   319      62.409  22.069  40.245  0.00  0.00
ATOM   5373  C   GLU   319      64.766  24.470  43.666  0.00  0.00
ATOM   5374  O   GLU   319      64.896  25.413  42.914  0.00  0.00
ATOM   5375  N   HIE   320      64.159  24.603  44.835  0.00  0.00
ATOM   5376  H   HIE   320      64.128  23.805  45.424  0.00  0.00
ATOM   5377  CA  HIE   320      63.646  25.861  45.384  0.00  0.00
ATOM   5378  HA  HIE   320      63.537  26.597  44.605  0.00  0.00
ATOM   5379  CB  HIE   320      62.259  25.618  45.966  0.00  0.00
ATOM   5380  HB2 HIE   320      61.676  25.114  45.227  0.00  0.00
ATOM   5381  HB3 HIE   320      62.342  24.971  46.812  0.00  0.00
ATOM   5382  CG  HIE   320      61.516  26.838  46.375  0.00  0.00
ATOM   5383  ND1 HIE   320      60.515  27.430  45.681  0.00  0.00
ATOM   5384  CE1 HIE   320      60.123  28.468  46.400  0.00  0.00
ATOM   5385  HE1 HIE   320      59.367  29.142  46.143  0.00  0.00
ATOM   5386  NE2 HIE   320      60.824  28.557  47.484  0.00  0.00
ATOM   5387  HE2 HIE   320      60.742  29.268  48.165  0.00  0.00
ATOM   5388  CD2 HIE   320      61.700  27.535  47.493  0.00  0.00
ATOM   5389  HD2 HIE   320      62.407  27.320  48.233  0.00  0.00
ATOM   5390  C   HIE   320      64.605  26.462  46.404  0.00  0.00
ATOM   5391  O   HIE   320      64.801  27.660  46.433  0.00  0.00
ATOM   5392  N   ALA   321      65.277  25.654  47.206  0.00  0.00
ATOM   5393  H   ALA   321      65.064  24.686  47.163  0.00  0.00
ATOM   5394  CA  ALA   321      66.250  26.107  48.187  0.00  0.00
ATOM   5395  HA  ALA   321      65.739  26.757  48.880  0.00  0.00
ATOM   5396  CB  ALA   321      66.762  24.898  48.960  0.00  0.00
ATOM   5397  HB1 ALA   321      66.834  24.555  49.127  0.00  0.00
ATOM   5398  HB2 ALA   321      66.954  24.612  49.124  0.00  0.00
ATOM   5399  HB3 ALA   321      66.873  24.657  49.216  0.00  0.00
ATOM   5400  C   ALA   321      67.416  26.899  47.588  0.00  0.00
ATOM   5401  O   ALA   321      67.899  27.839  48.190  0.00  0.00
ATOM   5402  N   ARG   322      67.845  26.558  46.379  0.00  0.00
ATOM   5403  H   ARG   322      67.447  25.744  45.982  0.00  0.00
ATOM   5404  CA  ARG   322      68.892  27.255  45.628  0.00  0.00
ATOM   5405  HA  ARG   322      69.765  27.326  46.252  0.00  0.00
ATOM   5406  CB  ARG   322      69.276  26.421  44.410  0.00  0.00
ATOM   5407  HB2 ARG   322      70.127  26.731  44.053  0.00  0.00
ATOM   5408  HB3 ARG   322      69.391  25.490  44.678  0.00  0.00
ATOM   5409  CG  ARG   322      68.384  26.414  43.309  0.00  0.00
ATOM   5410  HG2 ARG   322      67.593  26.105  43.666  0.00  0.00
ATOM   5411  HG3 ARG   322      68.260  27.262  42.975  0.00  0.00
ATOM   5412  CD  ARG   322      68.712  25.656  42.151  0.00  0.00
ATOM   5413  HD2 ARG   322      69.491  25.840  41.876  0.00  0.00
ATOM   5414  HD3 ARG   322      68.717  24.845  42.413  0.00  0.00
ATOM   5415  NE  ARG   322      67.984  25.755  41.085  0.00  0.00
ATOM   5416  HE  ARG   322      67.500  26.328  41.155  0.00  0.00
ATOM   5417  CZ  ARG   322      67.894  25.206  40.027  0.00  0.00
ATOM   5418  NH1 ARG   322      67.222  25.427  39.179  0.00  0.00
ATOM   5419 1HH1 ARG   322      66.787  26.036  39.333  0.00  0.00
ATOM   5420 2HH1 ARG   322      67.176  25.026  38.364  0.00  0.00
ATOM   5421  NH2 ARG   322      68.460  24.435  39.776  0.00  0.00
ATOM   5422 1HH2 ARG   322      68.993  24.239  40.386  0.00  0.00
ATOM   5423 2HH2 ARG   322      68.377  24.071  38.953  0.00  0.00
ATOM   5424  C   ARG   322      68.567  28.694  45.235  0.00  0.00
ATOM   5425  O   ARG   322      69.458  29.438  44.889  0.00  0.00
ATOM   5426  N   GLU   323      67.314  29.085  45.264  0.00  0.00
ATOM   5427  H   GLU   323      66.640  28.442  45.599  0.00  0.00
ATOM   5428  CA  GLU   323      66.825  30.367  44.745  0.00  0.00
ATOM   5429  HA  GLU   323      67.358  30.613  43.840  0.00  0.00
ATOM   5430  CB  GLU   323      65.343  30.236  44.386  0.00  0.00
ATOM   5431  HB2 GLU   323      64.792  29.977  45.272  0.00  0.00
ATOM   5432  HB3 GLU   323      64.981  31.198  44.068  0.00  0.00
ATOM   5433  CG  GLU   323      65.030  29.212  43.296  0.00  0.00
ATOM   5434  HG2 GLU   323      65.467  28.268  43.540  0.00  0.00
ATOM   5435  HG3 GLU   323      63.973  29.077  43.259  0.00  0.00
ATOM   5436  CD  GLU   323      65.516  29.660  41.942  0.00  0.00
ATOM   5437  OE1 GLU   323      65.732  29.789  41.410  0.00  0.00
ATOM   5438  OE2 GLU   323      65.677  29.902  41.377  0.00  0.00
ATOM   5439  C   GLU   323      67.035  31.571  45.677  0.00  0.00
ATOM   5440  O   GLU   323      66.731  32.687  45.287  0.00  0.00
ATOM   5441  N   ARG   324      67.545  31.374  46.893  0.00  0.00
ATOM   5442  H   ARG   324      67.764  30.436  47.131  0.00  0.00
ATOM   5443  CA  ARG   324      67.785  32.434  47.878  0.00  0.00
ATOM   5444  HA  ARG   324      66.837  32.904  48.094  0.00  0.00
ATOM   5445  CB  ARG   324      68.301  31.806  49.178  0.00  0.00
ATOM   5446  HB2 ARG   324      67.678  30.971  49.426  0.00  0.00
ATOM   5447  HB3 ARG   324      69.294  31.441  49.023  0.00  0.00
ATOM   5448  CG  ARG   324      68.293  32.758  50.365  0.00  0.00
ATOM   5449  HG2 ARG   324      68.924  33.583  50.157  0.00  0.00
ATOM   5450  HG3 ARG   324      67.308  33.116  50.517  0.00  0.00
ATOM   5451  CD  ARG   324      68.751  32.098  51.645  0.00  0.00
ATOM   5452  HD2 ARG   324      68.060  31.336  51.893  0.00  0.00
ATOM   5453  HD3 ARG   324      69.709  31.667  51.481  0.00  0.00
ATOM   5454  NE  ARG   324      68.827  33.057  52.736  0.00  0.00
ATOM   5455  HE  ARG   324      68.640  33.991  52.499  0.00  0.00
ATOM   5456  CZ  ARG   324      69.119  32.876  53.989  0.00  0.00
ATOM   5457  NH1 ARG   324      69.449  31.760  54.473  0.00  0.00
ATOM   5458 1HH1 ARG   324      69.524  30.987  53.878  0.00  0.00
ATOM   5459 2HH1 ARG   324      69.693  31.723  55.427  0.00  0.00
ATOM   5460  NH2 ARG   324      69.080  33.865  54.800  0.00  0.00
ATOM   5461 1HH2 ARG   324      68.860  34.746  54.437  0.00  0.00
ATOM   5462 2HH2 ARG   324      69.292  33.749  55.763  0.00  0.00
ATOM   5463  C   ARG   324      68.711  33.527  47.352  0.00  0.00
ATOM   5464  O   ARG   324      69.744  33.234  46.782  0.00  0.00
ATOM   5465  N   LEU   325      68.350  34.777  47.575  0.00  0.00
ATOM   5466  H   LEU   325      67.497  34.916  48.068  0.00  0.00
ATOM   5467  CA  LEU   325      69.114  35.967  47.202  0.00  0.00
ATOM   5468  HA  LEU   325      69.288  35.928  46.137  0.00  0.00
ATOM   5469  CB  LEU   325      68.241  37.187  47.524  0.00  0.00
ATOM   5470  HB2 LEU   325      67.343  37.045  47.265  0.00  0.00
ATOM   5471  HB3 LEU   325      68.206  37.309  48.455  0.00  0.00
ATOM   5472  CG  LEU   325      68.526  38.447  47.017  0.00  0.00
ATOM   5473  HG  LEU   325      69.299  38.553  47.359  0.00  0.00
ATOM   5474  CD1 LEU   325      68.523  38.613  45.782  0.00  0.00
ATOM   5475 1HD1 LEU   325      68.467  38.484  45.373  0.00  0.00
ATOM   5476 2HD1 LEU   325      68.380  38.721  45.529  0.00  0.00
ATOM   5477 3HD1 LEU   325      68.735  38.774  45.529  0.00  0.00
ATOM   5478  CD2 LEU   325      67.722  39.452  47.297  0.00  0.00
ATOM   5479 1HD2 LEU   325      67.662  39.820  47.297  0.00  0.00
ATOM   5480 2HD2 LEU   325      67.319  39.574  47.213  0.00  0.00
ATOM   5481 3HD2 LEU   325      67.594  39.693  47.601  0.00  0.00
ATOM   5482  C   LEU   325      70.478  36.016  47.897  0.00  0.00
ATOM   5483  O   LEU   325      70.652  35.463  48.959  0.00  0.00
ATOM   5484  N   GLN   326      71.443  36.703  47.322  0.00  0.00
ATOM   5485  H   GLN   326      71.244  37.131  46.461  0.00  0.00
ATOM   5486  CA  GLN   326      72.772  36.934  47.879  0.00  0.00
ATOM   5487  HA  GLN   326      72.748  36.703  48.925  0.00  0.00
ATOM   5488  CB  GLN   326      73.773  36.001  47.237  0.00  0.00
ATOM   5489  HB2 GLN   326      74.262  36.135  47.030  0.00  0.00
ATOM   5490  HB3 GLN   326      74.003  35.614  47.517  0.00  0.00
ATOM   5491  CG  GLN   326      73.811  35.354  46.536  0.00  0.00
ATOM   5492  HG2 GLN   326      73.909  34.916  46.837  0.00  0.00
ATOM   5493  HG3 GLN   326      73.060  35.317  46.200  0.00  0.00
ATOM   5494  CD  GLN   326      74.738  35.302  45.886  0.00  0.00
ATOM   5495  OE1 GLN   326      75.567  35.352  45.834  0.00  0.00
ATOM   5496  NE2 GLN   326      74.640  35.194  45.378  0.00  0.00
ATOM   5497 1HE2 GLN   326      75.251  35.167  44.951  0.00  0.00
ATOM   5498 2HE2 GLN   326      73.958  35.162  45.427  0.00  0.00
ATOM   5499  C   GLN   326      73.210  38.398  47.760  0.00  0.00
ATOM   5500  O   GLN   326      72.711  39.143  46.953  0.00  0.00
ATOM   5501  N   ASP   327      74.159  38.811  48.575  0.00  0.00
ATOM   5502  H   ASP   327      74.533  38.142  49.189  0.00  0.00
ATOM   5503  CA  ASP   327      74.612  40.189  48.774  0.00  0.00
ATOM   5504  HA  ASP   327      73.741  40.821  48.741  0.00  0.00
ATOM   5505  CB  ASP   327      75.215  40.318  50.171  0.00  0.00
ATOM   5506  HB2 ASP   327      75.364  41.348  50.395  0.00  0.00
ATOM   5507  HB3 ASP   327      74.510  39.938  50.868  0.00  0.00
ATOM   5508  CG  ASP   327      76.523  39.614  50.363  0.00  0.00
ATOM   5509  OD1 ASP   327      77.159  39.596  50.739  0.00  0.00
ATOM   5510  OD2 ASP   327      76.922  39.052  50.171  0.00  0.00
ATOM   5511  C   ASP   327      75.580  40.745  47.723  0.00  0.00
ATOM   5512  O   ASP   327      76.017  41.879  47.847  0.00  0.00
ATOM   5513  N   ASP   328      75.937  39.978  46.695  0.00  0.00
ATOM   5514  H   ASP   328      75.535  39.073  46.647  0.00  0.00
ATOM   5515  CA  ASP   328      76.979  40.295  45.711  0.00  0.00
ATOM   5516  HA  ASP   328      77.185  39.382  45.181  0.00  0.00
ATOM   5517  CB  ASP   328      76.482  41.300  44.673  0.00  0.00
ATOM   5518  HB2 ASP   328      76.204  42.200  45.164  0.00  0.00
ATOM   5519  HB3 ASP   328      77.289  41.543  44.021  0.00  0.00
ATOM   5520  CG  ASP   328      75.344  40.794  43.822  0.00  0.00
ATOM   5521  OD1 ASP   328      74.332  41.450  43.709  0.00  0.00
ATOM   5522  OD2 ASP   328      75.467  39.737  43.254  0.00  0.00
ATOM   5523  C   ASP   328      78.333  40.690  46.324  0.00  0.00
ATOM   5524  O   ASP   328      79.095  41.423  45.722  0.00  0.00
ATOM   5525  N   SER   329      78.635  40.216  47.525  0.00  0.00
ATOM   5526  H   SER   329      77.956  39.629  47.953  0.00  0.00
ATOM   5527  CA  SER   329      79.770  40.615  48.367  0.00  0.00
ATOM   5528  HA  SER   329      79.661  40.083  49.291  0.00  0.00
ATOM   5529  CB  SER   329      81.083  40.154  47.772  0.00  0.00
ATOM   5530  HB2 SER   329      81.252  40.631  46.856  0.00  0.00
ATOM   5531  HB3 SER   329      81.879  40.389  48.423  0.00  0.00
ATOM   5532  OG  SER   329      81.089  38.800  47.551  0.00  0.00
ATOM   5533  HG  SER   329      80.979  38.550  47.280  0.00  0.00
ATOM   5534  C   SER   329      79.806  42.095  48.769  0.00  0.00
ATOM   5535  O   SER   329      80.825  42.583  49.215  0.00  0.00
ATOM   5536  N   VAL   330      78.697  42.810  48.637  0.00  0.00
ATOM   5537  H   VAL   330      77.910  42.332  48.269  0.00  0.00
ATOM   5538  CA  VAL   330      78.505  44.221  48.994  0.00  0.00
ATOM   5539  HA  VAL   330      79.273  44.512  49.693  0.00  0.00
ATOM   5540  CB  VAL   330      78.625  45.143  47.778  0.00  0.00
ATOM   5541  HB  VAL   330      77.809  44.937  47.123  0.00  0.00
ATOM   5542  CG1 VAL   330      78.580  46.606  48.175  0.00  0.00
ATOM   5543 1HG1 VAL   330      78.603  46.989  48.245  0.00  0.00
ATOM   5544 2HG1 VAL   330      78.511  46.976  48.252  0.00  0.00
ATOM   5545 3HG1 VAL   330      78.581  46.946  48.316  0.00  0.00
ATOM   5546  CG2 VAL   330      79.912  44.949  47.001  0.00  0.00
ATOM   5547 1HG2 VAL   330      79.986  44.054  46.589  0.00  0.00
ATOM   5548 2HG2 VAL   330      79.989  45.591  46.249  0.00  0.00
ATOM   5549 3HG2 VAL   330      80.689  45.083  47.573  0.00  0.00
ATOM   5550  C   VAL   330      77.162  44.369  49.707  0.00  0.00
ATOM   5551  O   VAL   330      76.188  44.863  49.178  0.00  0.00
ATOM   5552  N   GLU   331      77.082  43.866  50.919  0.00  0.00
ATOM   5553  H   GLU   331      77.890  43.420  51.261  0.00  0.00
ATOM   5554  CA  GLU   331      75.930  44.003  51.818  0.00  0.00
ATOM   5555  HA  GLU   331      75.062  43.591  51.328  0.00  0.00
ATOM   5556  CB  GLU   331      76.206  43.204  53.085  0.00  0.00
ATOM   5557  HB2 GLU   331      76.502  42.236  52.823  0.00  0.00
ATOM   5558  HB3 GLU   331      76.993  43.643  53.608  0.00  0.00
ATOM   5559  CG  GLU   331      75.050  43.065  54.000  0.00  0.00
ATOM   5560  HG2 GLU   331      74.754  43.997  54.346  0.00  0.00
ATOM   5561  HG3 GLU   331      74.259  42.654  53.474  0.00  0.00
ATOM   5562  CD  GLU   331      75.397  42.192  55.168  0.00  0.00
ATOM   5563  OE1 GLU   331      75.807  42.285  55.867  0.00  0.00
ATOM   5564  OE2 GLU   331      75.305  41.387  55.380  0.00  0.00
ATOM   5565  C   GLU   331      75.652  45.471  52.143  0.00  0.00
ATOM   5566  O   GLU   331      76.563  46.223  52.437  0.00  0.00
ATOM   5567  N   THR   332      74.391  45.875  52.142  0.00  0.00
ATOM   5568  H   THR   332      73.685  45.218  51.903  0.00  0.00
ATOM   5569  CA  THR   332      73.939  47.216  52.544  0.00  0.00
ATOM   5570  HA  THR   332      74.733  47.695  53.104  0.00  0.00
ATOM   5571  CB  THR   332      73.631  48.108  51.341  0.00  0.00
ATOM   5572  HB  THR   332      73.322  49.074  51.721  0.00  0.00
ATOM   5573  CG2 THR   332      74.816  48.361  50.421  0.00  0.00
ATOM   5574 1HG2 THR   332      75.056  48.429  50.161  0.00  0.00
ATOM   5575 2HG2 THR   332      75.128  48.476  50.239  0.00  0.00
ATOM   5576 3HG2 THR   332      75.137  48.375  50.204  0.00  0.00
ATOM   5577  OG1 THR   332      72.583  47.598  50.559  0.00  0.00
ATOM   5578  HG1 THR   332      72.096  48.355  50.277  0.00  0.00
ATOM   5579  C   THR   332      72.718  47.136  53.468  0.00  0.00
ATOM   5580  O   THR   332      72.188  46.054  53.669  0.00  0.00
ATOM   5581  N   VAL   333      72.251  48.246  54.042  0.00  0.00
ATOM   5582  H   VAL   333      72.762  49.090  53.908  0.00  0.00
ATOM   5583  CA  VAL   333      71.094  48.265  54.951  0.00  0.00
ATOM   5584  HA  VAL   333      71.350  47.638  55.788  0.00  0.00
ATOM   5585  CB  VAL   333      70.823  49.655  55.505  0.00  0.00
ATOM   5586  HB  VAL   333      70.488  50.189  54.889  0.00  0.00
ATOM   5587  CG1 VAL   333      70.006  49.716  56.480  0.00  0.00
ATOM   5588 1HG1 VAL   333      69.771  49.597  56.553  0.00  0.00
ATOM   5589 2HG1 VAL   333      69.896  49.785  56.860  0.00  0.00
ATOM   5590 3HG1 VAL   333      69.737  49.828  56.745  0.00  0.00
ATOM   5591  CG2 VAL   333      71.819  50.342  55.976  0.00  0.00
ATOM   5592 1HG2 VAL   333      72.072  50.394  56.191  0.00  0.00
ATOM   5593 2HG2 VAL   333      72.181  50.542  55.928  0.00  0.00
ATOM   5594 3HG2 VAL   333      71.934  50.617  56.153  0.00  0.00
ATOM   5595  C   VAL   333      69.838  47.650  54.345  0.00  0.00
ATOM   5596  O   VAL   333      69.163  46.898  55.026  0.00  0.00
ATOM   5597  N   THR   334      69.574  47.833  53.047  0.00  0.00
ATOM   5598  H   THR   334      70.130  48.497  52.560  0.00  0.00
ATOM   5599  CA  THR   334      68.496  47.144  52.326  0.00  0.00
ATOM   5600  HA  THR   334      67.549  47.435  52.760  0.00  0.00
ATOM   5601  CB  THR   334      68.474  47.556  50.855  0.00  0.00
ATOM   5602  HB  THR   334      69.439  47.352  50.426  0.00  0.00
ATOM   5603  CG2 THR   334      67.428  46.835  50.038  0.00  0.00
ATOM   5604 1HG2 THR   334      67.148  46.711  49.843  0.00  0.00
ATOM   5605 2HG2 THR   334      67.206  46.655  49.780  0.00  0.00
ATOM   5606 3HG2 THR   334      67.172  46.613  49.861  0.00  0.00
ATOM   5607  OG1 THR   334      68.204  48.922  50.711  0.00  0.00
ATOM   5608  HG1 THR   334      68.996  49.391  50.910  0.00  0.00
ATOM   5609  C   THR   334      68.585  45.621  52.433  0.00  0.00
ATOM   5610  O   THR   334      67.578  44.958  52.630  0.00  0.00
ATOM   5611  N   SER   335      69.784  45.049  52.362  0.00  0.00
ATOM   5612  H   SER   335      70.594  45.620  52.263  0.00  0.00
ATOM   5613  CA  SER   335      70.003  43.607  52.526  0.00  0.00
ATOM   5614  HA  SER   335      69.349  43.070  51.855  0.00  0.00
ATOM   5615  CB  SER   335      71.436  43.247  52.176  0.00  0.00
ATOM   5616  HB2 SER   335      72.086  43.602  52.947  0.00  0.00
ATOM   5617  HB3 SER   335      71.536  42.178  52.112  0.00  0.00
ATOM   5618  OG  SER   335      71.833  43.797  50.958  0.00  0.00
ATOM   5619  HG  SER   335      71.367  43.375  50.304  0.00  0.00
ATOM   5620  C   SER   335      69.700  43.129  53.941  0.00  0.00
ATOM   5621  O   SER   335      69.191  42.042  54.117  0.00  0.00
ATOM   5622  N   ILE   336      69.970  43.944  54.952  0.00  0.00
ATOM   5623  H   ILE   336      70.382  44.817  54.732  0.00  0.00
ATOM   5624  CA  ILE   336      69.633  43.667  56.356  0.00  0.00
ATOM   5625  HA  ILE   336      69.913  42.645  56.573  0.00  0.00
ATOM   5626  CB  ILE   336      70.433  44.578  57.300  0.00  0.00
ATOM   5627  HB  ILE   336      70.173  45.577  57.091  0.00  0.00
ATOM   5628  CG2 ILE   336      70.097  44.312  58.737  0.00  0.00
ATOM   5629 1HG2 ILE   336      70.088  44.270  59.100  0.00  0.00
ATOM   5630 2HG2 ILE   336      69.979  44.321  59.087  0.00  0.00
ATOM   5631 3HG2 ILE   336      69.992  44.209  59.077  0.00  0.00
ATOM   5632  CG1 ILE   336      71.928  44.479  57.118  0.00  0.00
ATOM   5633 2HG1 ILE   336      72.183  44.482  56.671  0.00  0.00
ATOM   5634 3HG1 ILE   336      72.286  44.818  57.278  0.00  0.00
ATOM   5635  CD1 ILE   336      72.662  43.960  57.309  0.00  0.00
ATOM   5636 1HD1 ILE   336      72.807  43.791  57.378  0.00  0.00
ATOM   5637 2HD1 ILE   336      72.842  43.876  57.193  0.00  0.00
ATOM   5638 3HD1 ILE   336      72.923  43.850  57.478  0.00  0.00
ATOM   5639  C   ILE   336      68.123  43.756  56.601  0.00  0.00
ATOM   5640  O   ILE   336      67.565  42.906  57.270  0.00  0.00
ATOM   5641  N   GLU   337      67.438  44.723  56.003  0.00  0.00
ATOM   5642  H   GLU   337      67.964  45.392  55.483  0.00  0.00
ATOM   5643  CA  GLU   337      65.976  44.854  56.028  0.00  0.00
ATOM   5644  HA  GLU   337      65.645  44.889  57.058  0.00  0.00
ATOM   5645  CB  GLU   337      65.560  46.155  55.351  0.00  0.00
ATOM   5646  HB2 GLU   337      66.002  46.211  54.418  0.00  0.00
ATOM   5647  HB3 GLU   337      64.532  46.164  55.207  0.00  0.00
ATOM   5648  CG  GLU   337      65.905  47.367  56.119  0.00  0.00
ATOM   5649  HG2 GLU   337      65.396  47.345  56.996  0.00  0.00
ATOM   5650  HG3 GLU   337      66.903  47.332  56.360  0.00  0.00
ATOM   5651  CD  GLU   337      65.591  48.651  55.403  0.00  0.00
ATOM   5652  OE1 GLU   337      65.720  49.033  54.721  0.00  0.00
ATOM   5653  OE2 GLU   337      65.213  49.296  55.518  0.00  0.00
ATOM   5654  C   GLU   337      65.272  43.646  55.396  0.00  0.00
ATOM   5655  O   GLU   337      64.254  43.215  55.905  0.00  0.00
ATOM   5656  N   GLN   338      65.841  43.039  54.353  0.00  0.00
ATOM   5657  H   GLN   338      66.672  43.445  53.983  0.00  0.00
ATOM   5658  CA  GLN   338      65.378  41.763  53.788  0.00  0.00
ATOM   5659  HA  GLN   338      64.302  41.795  53.696  0.00  0.00
ATOM   5660  CB  GLN   338      65.969  41.563  52.385  0.00  0.00
ATOM   5661  HB2 GLN   338      66.968  41.804  52.385  0.00  0.00
ATOM   5662  HB3 GLN   338      65.885  40.574  52.118  0.00  0.00
ATOM   5663  CG  GLN   338      65.319  42.344  51.325  0.00  0.00
ATOM   5664  HG2 GLN   338      64.356  42.044  51.285  0.00  0.00
ATOM   5665  HG3 GLN   338      65.321  43.320  51.606  0.00  0.00
ATOM   5666  CD  GLN   338      65.934  42.226  49.948  0.00  0.00
ATOM   5667  OE1 GLN   338      67.044  42.260  49.758  0.00  0.00
ATOM   5668  NE2 GLN   338      65.229  42.113  48.950  0.00  0.00
ATOM   5669 1HE2 GLN   338      65.616  42.034  48.048  0.00  0.00
ATOM   5670 2HE2 GLN   338      64.315  42.053  49.100  0.00  0.00
ATOM   5671  C   GLN   338      65.696  40.570  54.700  0.00  0.00
ATOM   5672  O   GLN   338      64.836  39.727  54.919  0.00  0.00
ATOM   5673  N   ALA   339      66.896  40.504  55.270  0.00  0.00
ATOM   5674  H   ALA   339      67.558  41.217  55.047  0.00  0.00
ATOM   5675  CA  ALA   339      67.324  39.439  56.171  0.00  0.00
ATOM   5676  HA  ALA   339      67.295  38.516  55.614  0.00  0.00
ATOM   5677  CB  ALA   339      68.765  39.685  56.584  0.00  0.00
ATOM   5678  HB1 ALA   339      69.140  39.905  56.578  0.00  0.00
ATOM   5679  HB2 ALA   339      69.045  39.762  56.880  0.00  0.00
ATOM   5680  HB3 ALA   339      69.161  39.551  56.621  0.00  0.00
ATOM   5681  C   ALA   339      66.419  39.266  57.392  0.00  0.00
ATOM   5682  O   ALA   339      66.213  38.155  57.829  0.00  0.00
ATOM   5683  N   LYS   340      65.825  40.340  57.905  0.00  0.00
ATOM   5684  H   LYS   340      66.078  41.219  57.512  0.00  0.00
ATOM   5685  CA  LYS   340      64.843  40.342  58.992  0.00  0.00
ATOM   5686  HA  LYS   340      65.285  39.849  59.842  0.00  0.00
ATOM   5687  CB  LYS   340      64.515  41.776  59.390  0.00  0.00
ATOM   5688  HB2 LYS   340      64.342  42.305  58.619  0.00  0.00
ATOM   5689  HB3 LYS   340      63.718  41.823  59.930  0.00  0.00
ATOM   5690  CG  LYS   340      65.461  42.445  60.120  0.00  0.00
ATOM   5691  HG2 LYS   340      65.593  42.125  60.500  0.00  0.00
ATOM   5692  HG3 LYS   340      65.979  42.566  59.908  0.00  0.00
ATOM   5693  CD  LYS   340      65.514  43.402  60.629  0.00  0.00
ATOM   5694  HD2 LYS   340      65.496  43.689  60.410  0.00  0.00
ATOM   5695  HD3 LYS   340      65.113  43.352  60.676  0.00  0.00
ATOM   5696  CE  LYS   340      66.161  44.039  61.372  0.00  0.00
ATOM   5697  HE2 LYS   340      66.279  43.784  61.517  0.00  0.00
ATOM   5698  HE3 LYS   340      66.453  44.166  61.265  0.00  0.00
ATOM   5699  NZ  LYS   340      66.268  44.809  62.030  0.00  0.00
ATOM   5700  HZ1 LYS   340      66.308  45.020  62.340  0.00  0.00
ATOM   5701  HZ2 LYS   340      66.356  44.991  62.140  0.00  0.00
ATOM   5702  HZ3 LYS   340      66.225  44.984  62.093  0.00  0.00
ATOM   5703  C   LYS   340      63.564  39.553  58.716  0.00  0.00
ATOM   5704  O   LYS   340      62.821  39.293  59.638  0.00  0.00
ATOM   5705  N   VAL   341      63.316  39.130  57.482  0.00  0.00
ATOM   5706  H   VAL   341      63.967  39.394  56.794  0.00  0.00
ATOM   5707  CA  VAL   341      62.200  38.262  57.080  0.00  0.00
ATOM   5708  HA  VAL   341      61.687  37.896  57.960  0.00  0.00
ATOM   5709  CB  VAL   341      61.179  39.039  56.240  0.00  0.00
ATOM   5710  HB  VAL   341      61.671  39.432  55.385  0.00  0.00
ATOM   5711  CG1 VAL   341      60.030  38.196  55.765  0.00  0.00
ATOM   5712 1HG1 VAL   341      59.696  37.889  55.931  0.00  0.00
ATOM   5713 2HG1 VAL   341      59.604  38.241  55.542  0.00  0.00
ATOM   5714 3HG1 VAL   341      59.933  37.851  55.456  0.00  0.00
ATOM   5715  CG2 VAL   341      60.595  40.189  57.009  0.00  0.00
ATOM   5716 1HG2 VAL   341      60.552  40.287  57.607  0.00  0.00
ATOM   5717 2HG2 VAL   341      60.759  40.750  56.990  0.00  0.00
ATOM   5718 3HG2 VAL   341      60.054  40.413  56.989  0.00  0.00
ATOM   5719  C   VAL   341      62.694  37.015  56.351  0.00  0.00
ATOM   5720  O   VAL   341      62.245  35.924  56.670  0.00  0.00
ATOM   5721  N   GLU   342      63.678  37.123  55.467  0.00  0.00
ATOM   5722  H   GLU   342      63.999  38.039  55.231  0.00  0.00
ATOM   5723  CA  GLU   342      64.263  35.992  54.734  0.00  0.00
ATOM   5724  HA  GLU   342      63.493  35.538  54.124  0.00  0.00
ATOM   5725  CB  GLU   342      65.352  36.520  53.805  0.00  0.00
ATOM   5726  HB2 GLU   342      64.950  37.338  53.236  0.00  0.00
ATOM   5727  HB3 GLU   342      66.159  36.902  54.399  0.00  0.00
ATOM   5728  CG  GLU   342      65.891  35.486  52.832  0.00  0.00
ATOM   5729  HG2 GLU   342      66.128  34.594  53.357  0.00  0.00
ATOM   5730  HG3 GLU   342      65.146  35.246  52.112  0.00  0.00
ATOM   5731  CD  GLU   342      67.131  35.993  52.148  0.00  0.00
ATOM   5732  OE1 GLU   342      67.038  36.598  51.104  0.00  0.00
ATOM   5733  OE2 GLU   342      68.212  35.787  52.669  0.00  0.00
ATOM   5734  C   GLU   342      64.812  34.912  55.671  0.00  0.00
ATOM   5735  O   GLU   342      64.556  33.736  55.468  0.00  0.00
ATOM   5736  N   GLU   343      65.527  35.289  56.734  0.00  0.00
ATOM   5737  H   GLU   343      65.709  36.261  56.869  0.00  0.00
ATOM   5738  CA  GLU   343      66.073  34.354  57.715  0.00  0.00
ATOM   5739  HA  GLU   343      66.580  33.571  57.172  0.00  0.00
ATOM   5740  CB  GLU   343      67.087  35.093  58.582  0.00  0.00
ATOM   5741  HB2 GLU   343      67.654  35.772  57.972  0.00  0.00
ATOM   5742  HB3 GLU   343      66.556  35.683  59.298  0.00  0.00
ATOM   5743  CG  GLU   343      68.071  34.201  59.324  0.00  0.00
ATOM   5744  HG2 GLU   343      68.653  34.805  59.976  0.00  0.00
ATOM   5745  HG3 GLU   343      67.531  33.530  59.948  0.00  0.00
ATOM   5746  CD  GLU   343      68.987  33.431  58.419  0.00  0.00
ATOM   5747  OE1 GLU   343      69.167  32.684  58.231  0.00  0.00
ATOM   5748  OE2 GLU   343      69.537  33.569  57.881  0.00  0.00
ATOM   5749  C   GLU   343      64.984  33.684  58.563  0.00  0.00
ATOM   5750  O   GLU   343      65.166  32.574  59.020  0.00  0.00
ATOM   5751  N   LYS   344      63.827  34.323  58.734  0.00  0.00
ATOM   5752  H   LYS   344      63.727  35.201  58.286  0.00  0.00
ATOM   5753  CA  LYS   344      62.663  33.758  59.425  0.00  0.00
ATOM   5754  HA  LYS   344      63.006  33.199  60.284  0.00  0.00
ATOM   5755  CB  LYS   344      61.709  34.862  59.898  0.00  0.00
ATOM   5756  HB2 LYS   344      61.324  35.396  59.056  0.00  0.00
ATOM   5757  HB3 LYS   344      60.874  34.402  60.386  0.00  0.00
ATOM   5758  CG  LYS   344      62.335  35.854  60.858  0.00  0.00
ATOM   5759  HG2 LYS   344      62.970  35.881  60.928  0.00  0.00
ATOM   5760  HG3 LYS   344      62.249  36.502  60.759  0.00  0.00
ATOM   5761  CD  LYS   344      62.179  35.967  61.838  0.00  0.00
ATOM   5762  HD2 LYS   344      61.973  35.878  61.574  0.00  0.00
ATOM   5763  HD3 LYS   344      62.194  35.763  62.166  0.00  0.00
ATOM   5764  CE  LYS   344      62.299  36.504  62.753  0.00  0.00
ATOM   5765  HE2 LYS   344      62.453  36.814  62.845  0.00  0.00
ATOM   5766  HE3 LYS   344      62.075  36.645  62.603  0.00  0.00
ATOM   5767  NZ  LYS   344      62.514  36.444  63.694  0.00  0.00
ATOM   5768  HZ1 LYS   344      62.578  36.426  63.796  0.00  0.00
ATOM   5769  HZ2 LYS   344      62.512  36.408  64.031  0.00  0.00
ATOM   5770  HZ3 LYS   344      62.617  36.454  63.952  0.00  0.00
ATOM   5771  C   LYS   344      61.920  32.749  58.554  0.00  0.00
ATOM   5772  O   LYS   344      61.452  31.767  59.084  0.00  0.00
ATOM   5773  N   ILE   345      61.882  32.932  57.240  0.00  0.00
ATOM   5774  H   ILE   345      62.266  33.780  56.892  0.00  0.00
ATOM   5775  CA  ILE   345      61.393  31.939  56.280  0.00  0.00
ATOM   5776  HA  ILE   345      60.435  31.575  56.625  0.00  0.00
ATOM   5777  CB  ILE   345      61.183  32.593  54.902  0.00  0.00
ATOM   5778  HB  ILE   345      62.074  33.074  54.613  0.00  0.00
ATOM   5779  CG2 ILE   345      60.860  31.585  53.845  0.00  0.00
ATOM   5780 1HG2 ILE   345      60.985  31.307  53.596  0.00  0.00
ATOM   5781 2HG2 ILE   345      60.660  31.221  53.694  0.00  0.00
ATOM   5782 3HG2 ILE   345      60.711  31.485  53.443  0.00  0.00
ATOM   5783  CG1 ILE   345      60.099  33.622  54.933  0.00  0.00
ATOM   5784 2HG1 ILE   345      59.518  33.410  55.058  0.00  0.00
ATOM   5785 3HG1 ILE   345      60.151  34.072  55.381  0.00  0.00
ATOM   5786  CD1 ILE   345      59.673  34.386  54.220  0.00  0.00
ATOM   5787 1HD1 ILE   345      59.592  34.636  54.093  0.00  0.00
ATOM   5788 2HD1 ILE   345      59.656  34.470  54.031  0.00  0.00
ATOM   5789 3HD1 ILE   345      59.466  34.611  54.031  0.00  0.00
ATOM   5790  C   ILE   345      62.340  30.727  56.226  0.00  0.00
ATOM   5791  O   ILE   345      61.887  29.595  56.327  0.00  0.00
ATOM   5792  N   GLN   346      63.650  30.960  56.183  0.00  0.00
ATOM   5793  H   GLN   346      63.959  31.902  56.079  0.00  0.00
ATOM   5794  CA  GLN   346      64.665  29.916  56.300  0.00  0.00
ATOM   5795  HA  GLN   346      64.501  29.215  55.495  0.00  0.00
ATOM   5796  CB  GLN   346      66.056  30.524  56.116  0.00  0.00
ATOM   5797  HB2 GLN   346      66.109  30.994  55.157  0.00  0.00
ATOM   5798  HB3 GLN   346      66.218  31.276  56.855  0.00  0.00
ATOM   5799  CG  GLN   346      67.203  29.534  56.221  0.00  0.00
ATOM   5800  HG2 GLN   346      68.122  30.061  56.164  0.00  0.00
ATOM   5801  HG3 GLN   346      67.180  29.062  57.164  0.00  0.00
ATOM   5802  CD  GLN   346      67.218  28.499  55.169  0.00  0.00
ATOM   5803  OE1 GLN   346      67.175  28.533  54.189  0.00  0.00
ATOM   5804  NE2 GLN   346      67.282  27.534  55.332  0.00  0.00
ATOM   5805 1HE2 GLN   346      67.328  26.863  54.643  0.00  0.00
ATOM   5806 2HE2 GLN   346      67.330  27.460  56.141  0.00  0.00
ATOM   5807  C   GLN   346      64.547  29.122  57.606  0.00  0.00
ATOM   5808  O   GLN   346      64.732  27.916  57.597  0.00  0.00
ATOM   5809  N   GLU   347      64.209  29.755  58.721  0.00  0.00
ATOM   5810  H   GLU   347      64.119  30.745  58.696  0.00  0.00
ATOM   5811  CA  GLU   347      63.994  29.072  60.006  0.00  0.00
ATOM   5812  HA  GLU   347      64.879  28.500  60.243  0.00  0.00
ATOM   5813  CB  GLU   347      63.805  30.113  61.106  0.00  0.00
ATOM   5814  HB2 GLU   347      64.568  30.824  61.039  0.00  0.00
ATOM   5815  HB3 GLU   347      62.897  30.607  60.960  0.00  0.00
ATOM   5816  CG  GLU   347      63.802  29.559  62.489  0.00  0.00
ATOM   5817  HG2 GLU   347      63.040  28.935  62.610  0.00  0.00
ATOM   5818  HG3 GLU   347      64.626  29.027  62.634  0.00  0.00
ATOM   5819  CD  GLU   347      63.698  30.582  63.504  0.00  0.00
ATOM   5820  OE1 GLU   347      63.876  30.972  63.910  0.00  0.00
ATOM   5821  OE2 GLU   347      63.414  31.003  63.888  0.00  0.00
ATOM   5822  C   GLU   347      62.823  28.082  59.960  0.00  0.00
ATOM   5823  O   GLU   347      62.928  27.009  60.532  0.00  0.00
ATOM   5824  N   VAL   348      61.745  28.385  59.240  0.00  0.00
ATOM   5825  H   VAL   348      61.711  29.270  58.787  0.00  0.00
ATOM   5826  CA  VAL   348      60.637  27.440  59.027  0.00  0.00
ATOM   5827  HA  VAL   348      60.371  27.017  59.985  0.00  0.00
ATOM   5828  CB  VAL   348      59.379  28.112  58.455  0.00  0.00
ATOM   5829  HB  VAL   348      59.536  28.409  57.503  0.00  0.00
ATOM   5830  CG1 VAL   348      58.269  27.206  58.452  0.00  0.00
ATOM   5831 1HG1 VAL   348      58.042  26.966  58.599  0.00  0.00
ATOM   5832 2HG1 VAL   348      57.869  27.128  58.393  0.00  0.00
ATOM   5833 3HG1 VAL   348      58.075  26.857  58.368  0.00  0.00
ATOM   5834  CG2 VAL   348      58.934  29.274  59.190  0.00  0.00
ATOM   5835 1HG2 VAL   348      58.767  29.573  59.375  0.00  0.00
ATOM   5836 2HG2 VAL   348      58.871  29.579  59.387  0.00  0.00
ATOM   5837 3HG2 VAL   348      58.842  29.530  59.323  0.00  0.00
ATOM   5838  C   VAL   348      61.076  26.270  58.147  0.00  0.00
ATOM   5839  O   VAL   348      60.784  25.145  58.489  0.00  0.00
ATOM   5840  N   PHE   349      61.821  26.503  57.073  0.00  0.00
ATOM   5841  H   PHE   349      62.021  27.443  56.824  0.00  0.00
ATOM   5842  CA  PHE   349      62.396  25.412  56.282  0.00  0.00
ATOM   5843  HA  PHE   349      61.587  24.764  55.975  0.00  0.00
ATOM   5844  CB  PHE   349      63.112  25.954  55.034  0.00  0.00
ATOM   5845  HB2 PHE   349      63.857  26.664  55.343  0.00  0.00
ATOM   5846  HB3 PHE   349      63.635  25.129  54.584  0.00  0.00
ATOM   5847  CG  PHE   349      62.263  26.586  53.951  0.00  0.00
ATOM   5848  CD1 PHE   349      61.099  25.981  53.505  0.00  0.00
ATOM   5849  HD1 PHE   349      60.754  25.091  53.961  0.00  0.00
ATOM   5850  CE1 PHE   349      60.372  26.523  52.450  0.00  0.00
ATOM   5851  HE1 PHE   349      59.476  26.066  52.139  0.00  0.00
ATOM   5852  CZ  PHE   349      60.800  27.679  51.827  0.00  0.00
ATOM   5853  HZ  PHE   349      60.233  28.107  51.030  0.00  0.00
ATOM   5854  CE2 PHE   349      61.947  28.293  52.258  0.00  0.00
ATOM   5855  HE2 PHE   349      62.263  29.179  51.775  0.00  0.00
ATOM   5856  CD2 PHE   349      62.674  27.750  53.320  0.00  0.00
ATOM   5857  HD2 PHE   349      63.561  28.221  53.640  0.00  0.00
ATOM   5858  C   PHE   349      63.341  24.532  57.112  0.00  0.00
ATOM   5859  O   PHE   349      63.247  23.321  57.059  0.00  0.00
ATOM   5860  N   SER   350      64.210  25.118  57.931  0.00  0.00
ATOM   5861  H   SER   350      64.294  26.110  57.892  0.00  0.00
ATOM   5862  CA  SER   350      65.109  24.392  58.840  0.00  0.00
ATOM   5863  HA  SER   350      65.699  23.706  58.251  0.00  0.00
ATOM   5864  CB  SER   350      66.060  25.352  59.529  0.00  0.00
ATOM   5865  HB2 SER   350      65.534  26.098  60.032  0.00  0.00
ATOM   5866  HB3 SER   350      66.637  24.842  60.232  0.00  0.00
ATOM   5867  OG  SER   350      66.885  25.946  58.633  0.00  0.00
ATOM   5868  HG  SER   350      67.123  26.622  58.882  0.00  0.00
ATOM   5869  C   SER   350      64.368  23.560  59.885  0.00  0.00
ATOM   5870  O   SER   350      64.780  22.452  60.190  0.00  0.00
ATOM   5871  N   SER   351      63.224  24.042  60.362  0.00  0.00
ATOM   5872  H   SER   351      62.955  24.956  60.076  0.00  0.00
ATOM   5873  CA  SER   351      62.329  23.326  61.281  0.00  0.00
ATOM   5874  HA  SER   351      62.906  23.034  62.141  0.00  0.00
ATOM   5875  CB  SER   351      61.219  24.238  61.767  0.00  0.00
ATOM   5876  HB2 SER   351      60.654  24.589  61.001  0.00  0.00
ATOM   5877  HB3 SER   351      60.607  23.714  62.380  0.00  0.00
ATOM   5878  OG  SER   351      61.678  25.280  62.455  0.00  0.00
ATOM   5879  HG  SER   351      61.921  25.754  62.032  0.00  0.00
ATOM   5880  C   SER   351      61.719  22.049  60.708  0.00  0.00
ATOM   5881  O   SER   351      61.148  21.277  61.458  0.00  0.00
ATOM   5882  N   TYR   352      61.901  21.791  59.421  0.00  0.00
ATOM   5883  H   TYR   352      62.309  22.512  58.866  0.00  0.00
ATOM   5884  CA  TYR   352      61.472  20.574  58.728  0.00  0.00
ATOM   5885  HA  TYR   352      61.125  19.847  59.450  0.00  0.00
ATOM   5886  CB  TYR   352      60.300  20.924  57.815  0.00  0.00
ATOM   5887  HB2 TYR   352      60.640  21.652  57.103  0.00  0.00
ATOM   5888  HB3 TYR   352      60.015  20.047  57.264  0.00  0.00
ATOM   5889  CG  TYR   352      59.065  21.439  58.511  0.00  0.00
ATOM   5890  CD1 TYR   352      58.598  22.721  58.252  0.00  0.00
ATOM   5891  HD1 TYR   352      59.122  23.332  57.557  0.00  0.00
ATOM   5892  CE1 TYR   352      57.483  23.219  58.919  0.00  0.00
ATOM   5893  HE1 TYR   352      57.144  24.207  58.728  0.00  0.00
ATOM   5894  CZ  TYR   352      56.818  22.422  59.847  0.00  0.00
ATOM   5895  OH  TYR   352      55.759  22.886  60.527  0.00  0.00
ATOM   5896  HH  TYR   352      55.607  23.797  60.364  0.00  0.00
ATOM   5897  CE2 TYR   352      57.268  21.128  60.084  0.00  0.00
ATOM   5898  HE2 TYR   352      56.757  20.529  60.796  0.00  0.00
ATOM   5899  CD2 TYR   352      58.395  20.641  59.423  0.00  0.00
ATOM   5900  HD2 TYR   352      58.747  19.660  59.624  0.00  0.00
ATOM   5901  C   TYR   352      62.606  19.877  57.968  0.00  0.00
ATOM   5902  O   TYR   352      62.358  18.967  57.220  0.00  0.00
ATOM   5903  N   LYS   353      63.853  20.269  58.185  0.00  0.00
ATOM   5904  H   LYS   353      63.953  21.036  58.796  0.00  0.00
ATOM   5905  CA  LYS   353      65.053  19.692  57.562  0.00  0.00
ATOM   5906  HA  LYS   353      64.777  18.784  57.052  0.00  0.00
ATOM   5907  CB  LYS   353      65.559  20.665  56.511  0.00  0.00
ATOM   5908  HB2 LYS   353      65.017  21.115  56.252  0.00  0.00
ATOM   5909  HB3 LYS   353      66.082  21.152  56.756  0.00  0.00
ATOM   5910  CG  LYS   353      66.063  20.374  55.465  0.00  0.00
ATOM   5911  HG2 LYS   353      66.668  19.973  55.679  0.00  0.00
ATOM   5912  HG3 LYS   353      65.533  19.829  55.231  0.00  0.00
ATOM   5913  CD  LYS   353      66.469  21.350  54.428  0.00  0.00
ATOM   5914  HD2 LYS   353      65.994  21.473  53.907  0.00  0.00
ATOM   5915  HD3 LYS   353      66.593  22.006  54.660  0.00  0.00
ATOM   5916  CE  LYS   353      67.363  21.228  53.801  0.00  0.00
ATOM   5917  HE2 LYS   353      67.768  21.168  54.172  0.00  0.00
ATOM   5918  HE3 LYS   353      67.323  20.655  53.700  0.00  0.00
ATOM   5919  NZ  LYS   353      67.738  21.911  52.867  0.00  0.00
ATOM   5920  HZ1 LYS   353      67.882  22.119  52.777  0.00  0.00
ATOM   5921  HZ2 LYS   353      67.885  21.987  52.553  0.00  0.00
ATOM   5922  HZ3 LYS   353      67.722  22.132  52.575  0.00  0.00
ATOM   5923  C   LYS   353      66.160  19.302  58.534  0.00  0.00
ATOM   5924  O   LYS   353      66.916  18.406  58.243  0.00  0.00
ATOM   5925  N   PHE   354      66.231  19.921  59.699  0.00  0.00
ATOM   5926  H   PHE   354      65.595  20.667  59.847  0.00  0.00
ATOM   5927  CA  PHE   354      67.291  19.741  60.701  0.00  0.00
ATOM   5928  HA  PHE   354      67.827  18.830  60.485  0.00  0.00
ATOM   5929  CB  PHE   354      68.281  20.907  60.614  0.00  0.00
ATOM   5930  HB2 PHE   354      67.787  21.797  60.926  0.00  0.00
ATOM   5931  HB3 PHE   354      69.083  20.730  61.296  0.00  0.00
ATOM   5932  CG  PHE   354      68.891  21.161  59.270  0.00  0.00
ATOM   5933  CD1 PHE   354      69.722  20.243  58.699  0.00  0.00
ATOM   5934  HD1 PHE   354      69.937  19.355  59.209  0.00  0.00
ATOM   5935  CE1 PHE   354      70.273  20.494  57.460  0.00  0.00
ATOM   5936  HE1 PHE   354      70.909  19.792  57.026  0.00  0.00
ATOM   5937  CZ  PHE   354      70.006  21.651  56.796  0.00  0.00
ATOM   5938  HZ  PHE   354      70.447  21.836  55.860  0.00  0.00
ATOM   5939  CE2 PHE   354      69.197  22.579  57.366  0.00  0.00
ATOM   5940  HE2 PHE   354      69.011  23.472  56.863  0.00  0.00
ATOM   5941  CD2 PHE   354      68.638  22.329  58.602  0.00  0.00
ATOM   5942  HD2 PHE   354      68.043  23.048  59.048  0.00  0.00
ATOM   5943  C   PHE   354      66.725  19.570  62.113  0.00  0.00
ATOM   5944  O   PHE   354      67.321  19.972  63.074  0.00  0.00
ATOM   5945  N   ASN   355      65.528  19.028  62.246  0.00  0.00
ATOM   5946  H   ASN   355      65.107  18.684  61.422  0.00  0.00
ATOM   5947  CA  ASN   355      64.707  19.067  63.451  0.00  0.00
ATOM   5948  HA  ASN   355      65.330  19.285  64.304  0.00  0.00
ATOM   5949  CB  ASN   355      63.724  20.227  63.244  0.00  0.00
ATOM   5950  HB2 ASN   355      64.259  21.091  62.908  0.00  0.00
ATOM   5951  HB3 ASN   355      63.032  19.945  62.480  0.00  0.00
ATOM   5952  CG  ASN   355      62.956  20.641  64.468  0.00  0.00
ATOM   5953  OD1 ASN   355      63.450  20.670  65.557  0.00  0.00
ATOM   5954  ND2 ASN   355      61.740  21.013  64.317  0.00  0.00
ATOM   5955 1HD2 ASN   355      61.235  21.291  65.116  0.00  0.00
ATOM   5956 2HD2 ASN   355      61.345  21.011  63.414  0.00  0.00
ATOM   5957  C   ASN   355      63.997  17.739  63.774  0.00  0.00
ATOM   5958  O   ASN   355      63.173  17.691  64.664  0.00  0.00
ATOM   5959  N   HIE   356      64.308  16.658  63.063  0.00  0.00
ATOM   5960  H   HIE   356      65.025  16.757  62.391  0.00  0.00
ATOM   5961  CA  HIE   356      63.642  15.354  63.133  0.00  0.00
ATOM   5962  HA  HIE   356      63.940  14.812  62.255  0.00  0.00
ATOM   5963  CB  HIE   356      64.177  14.566  64.324  0.00  0.00
ATOM   5964  HB2 HIE   356      64.450  14.929  64.879  0.00  0.00
ATOM   5965  HB3 HIE   356      63.733  14.148  64.712  0.00  0.00
ATOM   5966  CG  HIE   356      64.958  13.836  64.291  0.00  0.00
ATOM   5967  ND1 HIE   356      65.439  13.392  63.825  0.00  0.00
ATOM   5968  CE1 HIE   356      66.062  12.812  63.974  0.00  0.00
ATOM   5969  HE1 HIE   356      66.535  12.361  63.716  0.00  0.00
[truncated: 11,269,448 more chars]
